# Supplementary material
Source: PubMed Central journal article supplement (PMC4177450)
Supplement: NIHMS621016-supplement-Supp_FigureS1-S2___TableS1-S4.pdf [file NIHMS621016-supplement-Supp_FigureS1-S2___TableS1-S4.pdf]

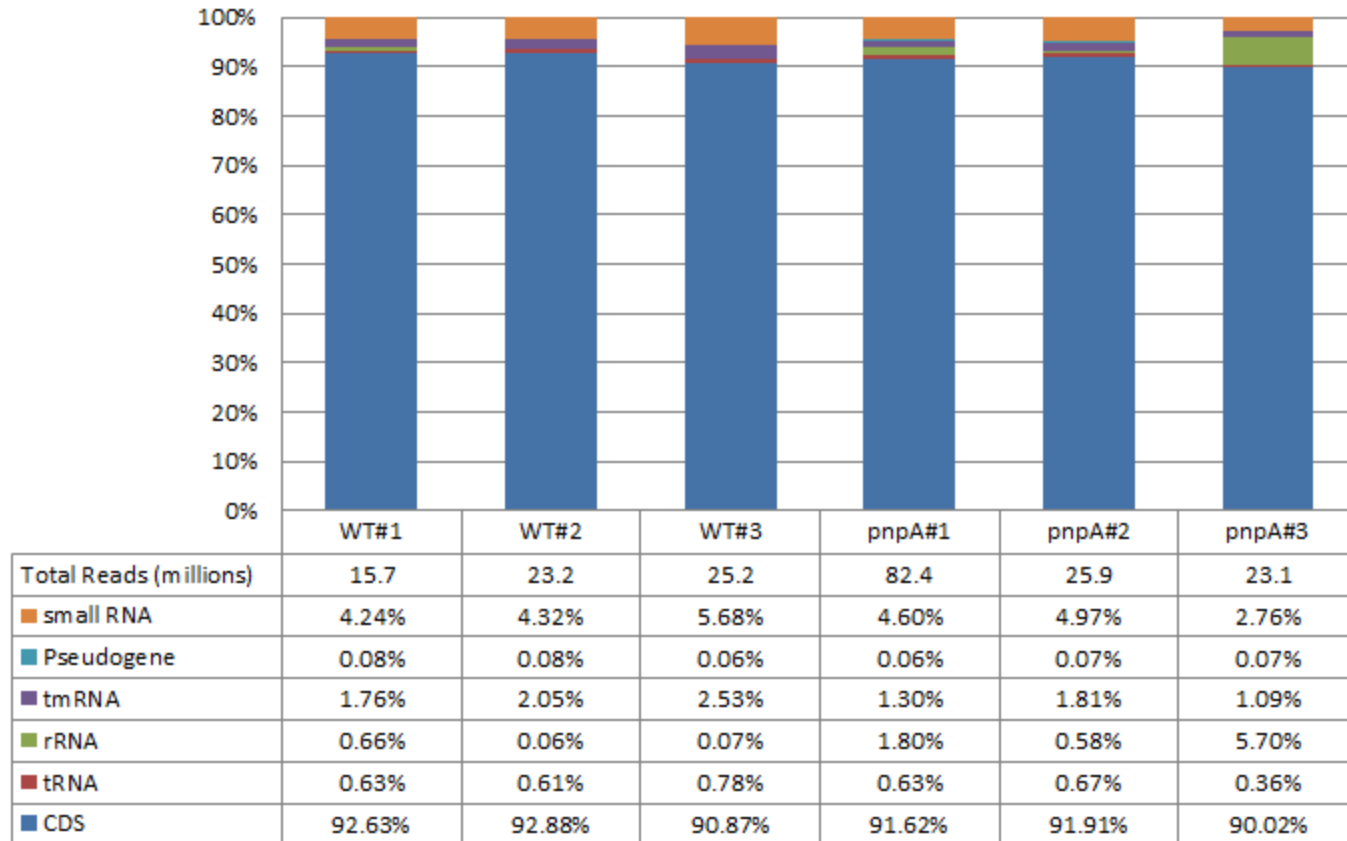

Figure S1. Mapping of RNA-Seq reads to genomic elements. Total reads for each RNA sample (three for wild type, three for *pnpA* mutant) are shown below the bar graphs, followed by percent of reads in six categories of RNAs listed in the NCBI annotation file.

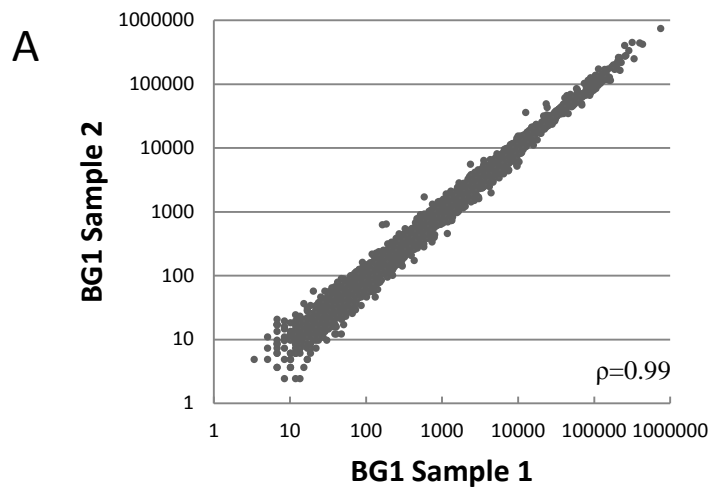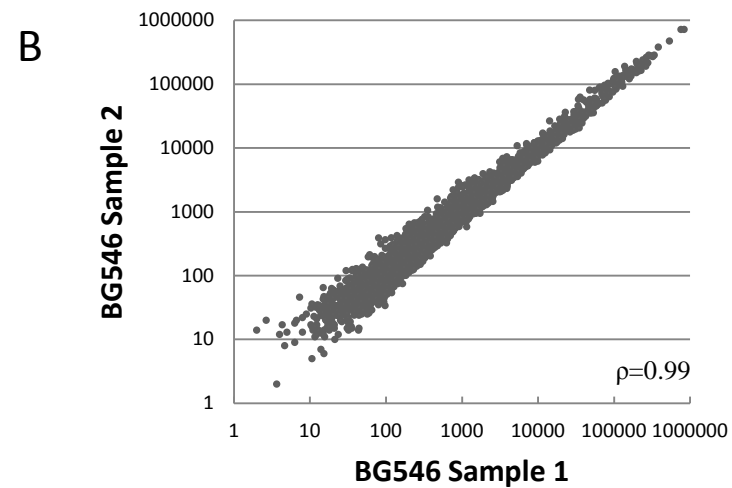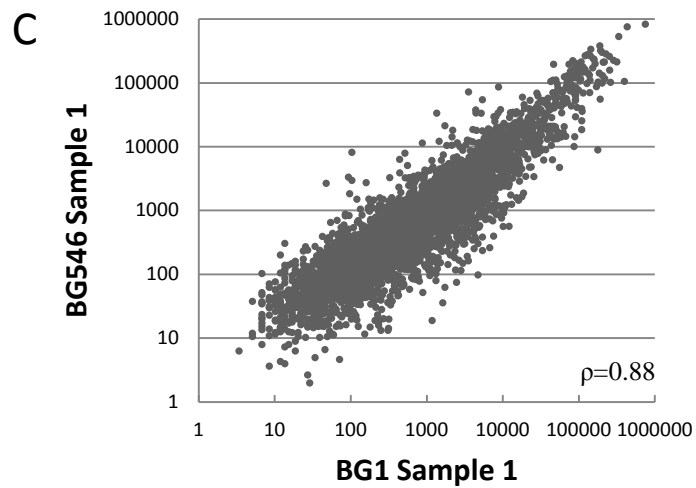

Figure S2. Pearson correlation analysis between biological replicates of same strain (A and B) and between different strains (C).

**Table S1. Read abundance (reads/base) in wild-type and *pnpA* strains for genes above cutoff**

| Accession number | Gene Name    | wild-type | <i>pnpA</i> mutant | <i>pnpA</i> /WT | <i>P</i> -value |
|------------------|--------------|-----------|--------------------|-----------------|-----------------|
| BSU00010         | <i>dnaA</i>  | 2.61      | 2.68               | 1.03            | 0.85            |
| BSU00020         | <i>dnaN</i>  | 5.10      | 3.62               | 0.71            | 0.03            |
| BSU00030         | <i>yaaA</i>  | 2.24      | 3.66               | 1.63            | 0.02            |
| BSU00040         | <i>recF</i>  | 8.12      | 8.65               | 1.07            | 0.19            |
| BSU00050         | <i>yaaB</i>  | 7.29      | 8.73               | 1.20            | 0.14            |
| BSU00060         | <i>gyrB</i>  | 10.42     | 11.01              | 1.06            | 0.56            |
| BSU00070         | <i>gyrA</i>  | 9.18      | 9.73               | 1.06            | 0.33            |
| BSU00090         | <i>guaB</i>  | 16.20     | 7.74               | 0.48            | 0.00            |
| BSU00100         | <i>dacA</i>  | 4.30      | 3.04               | 0.71            | 0.03            |
| BSU00110         | <i>yaaD</i>  | 11.94     | 5.05               | 0.42            | 0.00            |
| BSU00120         | <i>yaaE</i>  | 20.23     | 7.27               | 0.36            | 0.00            |
| BSU00130         | <i>serS</i>  | 22.29     | 11.64              | 0.52            | 0.01            |
| BSU00140         | <i>dck</i>   | 5.27      | 4.97               | 0.94            | 0.74            |
| BSU00150         | <i>dgk</i>   | 3.41      | 5.41               | 1.59            | 0.06            |
| BSU00180         | <i>tadA</i>  | 0.41      | 1.90               | 4.66            | 0.00            |
| BSU00190         | <i>dnaX</i>  | 1.75      | 1.92               | 1.10            | 0.46            |
| BSU00200         | <i>yaaK</i>  | 5.44      | 6.37               | 1.17            | 0.29            |
| BSU00210         | <i>recR</i>  | 2.81      | 3.64               | 1.30            | 0.03            |
| BSU00220         | <i>yaaL</i>  | 4.20      | 3.49               | 0.83            | 0.36            |
| BSU00230         | <i>bofA</i>  | 0.76      | 1.93               | 2.54            | 0.04            |
| BSU00250         | <i>xpaC</i>  | 4.21      | 1.32               | 0.31            | 0.01            |
| BSU00260         | <i>yaaN</i>  | 5.26      | 2.94               | 0.56            | 0.01            |
| BSU00270         | <i>yaaO</i>  | 2.81      | 1.97               | 0.70            | 0.00            |
| BSU00280         | <i>tmk</i>   | 3.67      | 2.66               | 0.72            | 0.01            |
| BSU00290         | <i>yaaQ</i>  | 8.23      | 6.76               | 0.82            | 0.02            |
| BSU00300         | <i>yaaR</i>  | 7.37      | 4.66               | 0.63            | 0.03            |
| BSU00310         | <i>holB</i>  | 6.82      | 5.22               | 0.77            | 0.02            |
| BSU00320         | <i>yaaT</i>  | 10.51     | 7.34               | 0.70            | 0.00            |
| BSU00330         | <i>yabA</i>  | 13.51     | 7.98               | 0.59            | 0.00            |
| BSU00340         | <i>yabB</i>  | 1.69      | 2.34               | 1.38            | 0.00            |
| BSU00350         | <i>yazA</i>  | 1.84      | 2.36               | 1.29            | 0.15            |
| BSU00360         | <i>yabC</i>  | 2.01      | 2.89               | 1.44            | 0.00            |
| BSU00370         | <i>abrB</i>  | 51.41     | 30.96              | 0.60            | 0.03            |
| BSU00380         | <i>metS</i>  | 5.78      | 2.87               | 0.50            | 0.00            |
| BSU00390         | <i>yabD</i>  | 1.66      | 1.04               | 0.62            | 0.01            |
| BSU00400         | <i>yabE</i>  | 2.06      | 2.87               | 1.39            | 0.03            |
| BSU00420         | <i>ksgA</i>  | 1.33      | 1.86               | 1.40            | 0.00            |
| BSU00440         | <i>veg</i>   | 169.77    | 130.19             | 0.77            | 0.47            |
| BSU00450         | <i>sspF</i>  | 2.41      | 2.04               | 0.85            | 0.54            |
| BSU00460         | <i>ipk</i>   | 1.14      | 2.50               | 2.19            | 0.00            |
| BSU00470         | <i>purR</i>  | 7.31      | 6.66               | 0.91            | 0.25            |
| BSU00480         | <i>yabJ</i>  | 15.43     | 9.03               | 0.59            | 0.01            |
| BSU00490         | <i>spoVG</i> | 78.28     | 5.91               | 0.08            | 0.00            |
| BSU00500         | <i>glmU</i>  | 4.18      | 3.08               | 0.74            | 0.00            |
| BSU00510         | <i>prs</i>   | 12.64     | 5.48               | 0.43            | 0.00            |

|          |              |        |        |      |      |
|----------|--------------|--------|--------|------|------|
| BSU00520 | <i>ctc</i>   | 126.84 | 107.56 | 0.85 | 0.33 |
| BSU00530 | <i>pth</i>   | 8.70   | 14.82  | 1.70 | 0.00 |
| BSU00540 | <i>yabK</i>  | 9.45   | 16.74  | 1.77 | 0.00 |
| BSU00550 | <i>mfd</i>   | 4.44   | 6.57   | 1.48 | 0.00 |
| BSU00560 | <i>spoVT</i> | 6.65   | 7.97   | 1.20 | 0.10 |
| BSU00570 | <i>yabM</i>  | 0.57   | 1.55   | 2.73 | 0.00 |
| BSU00580 | <i>yabN</i>  | 2.63   | 3.38   | 1.28 | 0.01 |
| BSU00590 | <i>yabO</i>  | 5.77   | 5.42   | 0.94 | 0.35 |
| BSU00600 | <i>yabP</i>  | 8.29   | 5.54   | 0.67 | 0.08 |
| BSU00610 | <i>yabQ</i>  | 6.33   | 5.14   | 0.81 | 0.20 |
| BSU00620 | <i>divIC</i> | 12.91  | 10.63  | 0.82 | 0.08 |
| BSU00630 | <i>yabR</i>  | 14.52  | 10.36  | 0.71 | 0.08 |
| BSU00650 | <i>yabS</i>  | 0.52   | 1.03   | 1.97 | 0.01 |
| BSU00670 | <i>tilS</i>  | 3.17   | 5.06   | 1.60 | 0.00 |
| BSU00680 | <i>hprT</i>  | 7.27   | 11.63  | 1.60 | 0.01 |
| BSU00690 | <i>ftsH</i>  | 42.17  | 38.63  | 0.92 | 0.15 |
| BSU00700 | <i>coaX</i>  | 2.75   | 2.90   | 1.05 | 0.45 |
| BSU00710 | <i>hslO</i>  | 8.08   | 5.56   | 0.69 | 0.00 |
| BSU00720 | <i>yacD</i>  | 1.56   | 1.08   | 0.69 | 0.04 |
| BSU00730 | <i>cysK</i>  | 10.59  | 2.94   | 0.28 | 0.00 |
| BSU00740 | <i>pabB</i>  | 1.48   | 4.49   | 3.04 | 0.00 |
| BSU00750 | <i>pabA</i>  | 4.45   | 4.51   | 1.01 | 0.84 |
| BSU00760 | <i>pabC</i>  | 2.51   | 2.85   | 1.14 | 0.01 |
| BSU00770 | <i>sul</i>   | 4.07   | 4.48   | 1.10 | 0.44 |
| BSU00780 | <i>folB</i>  | 5.71   | 6.80   | 1.19 | 0.11 |
| BSU00790 | <i>folK</i>  | 5.70   | 7.86   | 1.38 | 0.00 |
| BSU00800 | <i>yazB</i>  | 7.19   | 9.94   | 1.38 | 0.08 |
| BSU00810 | <i>dusB</i>  | 6.66   | 11.96  | 1.80 | 0.01 |
| BSU00820 | <i>lysS</i>  | 9.96   | 12.77  | 1.28 | 0.00 |
| BSU00830 | <i>ctsR</i>  | 8.58   | 8.76   | 1.02 | 0.94 |
| BSU00840 | <i>mcsA</i>  | 10.56  | 10.64  | 1.01 | 0.97 |
| BSU00850 | <i>mcsB</i>  | 13.58  | 11.74  | 0.86 | 0.21 |
| BSU00860 | <i>clpC</i>  | 34.22  | 16.77  | 0.49 | 0.00 |
| BSU00870 | <i>radA</i>  | 3.63   | 5.18   | 1.43 | 0.01 |
| BSU00880 | <i>yacK</i>  | 3.97   | 4.71   | 1.19 | 0.31 |
| BSU00890 | <i>yacL</i>  | 6.48   | 6.21   | 0.96 | 0.80 |
| BSU00900 | <i>ispD</i>  | 7.83   | 7.26   | 0.93 | 0.52 |
| BSU00910 | <i>ispF</i>  | 2.39   | 4.51   | 1.89 | 0.01 |
| BSU00920 | <i>gltX</i>  | 12.96  | 11.20  | 0.86 | 0.02 |
| BSU00930 | <i>cysE</i>  | 2.21   | 2.33   | 1.05 | 0.35 |
| BSU00940 | <i>cysS</i>  | 4.42   | 3.29   | 0.75 | 0.00 |
| BSU00950 | <i>mrnC</i>  | 5.15   | 4.24   | 0.82 | 0.00 |
| BSU00960 | <i>rlmB</i>  | 4.98   | 5.16   | 1.04 | 0.60 |
| BSU00970 | <i>yacP</i>  | 4.71   | 5.20   | 1.10 | 0.41 |
| BSU00980 | <i>sigH</i>  | 6.54   | 7.87   | 1.20 | 0.28 |
| BSU00990 | <i>rpmG</i>  | 20.40  | 12.48  | 0.61 | 0.05 |
| BSU01000 | <i>secE</i>  | 20.15  | 12.31  | 0.61 | 0.06 |
| BSU01010 | <i>nusG</i>  | 2.62   | 2.77   | 1.06 | 0.67 |
| BSU01020 | <i>rplK</i>  | 219.37 | 177.23 | 0.81 | 0.07 |
| BSU01030 | <i>rplA</i>  | 104.26 | 129.98 | 1.25 | 0.02 |

|          |             |        |        |      |      |
|----------|-------------|--------|--------|------|------|
| BSU01040 | <i>rplJ</i> | 384.16 | 318.39 | 0.83 | 0.13 |
| BSU01050 | <i>rplL</i> | 539.33 | 347.31 | 0.64 | 0.02 |
| BSU01060 | <i>ybxB</i> | 4.16   | 25.96  | 6.24 | 0.00 |
| BSU01070 | <i>rpoB</i> | 29.11  | 38.42  | 1.32 | 0.18 |
| BSU01080 | <i>rpoC</i> | 62.80  | 76.41  | 1.22 | 0.26 |
| BSU01090 | <i>ybxF</i> | 108.35 | 266.44 | 2.46 | 0.00 |
| BSU01100 | <i>rpsL</i> | 125.20 | 243.64 | 1.95 | 0.00 |
| BSU01110 | <i>rpsG</i> | 159.22 | 273.53 | 1.72 | 0.00 |
| BSU01120 | <i>fusA</i> | 224.29 | 338.43 | 1.51 | 0.01 |
| BSU01130 | <i>tufA</i> | 675.14 | 615.72 | 0.91 | 0.42 |
| BSU01140 | <i>ybaC</i> | 0.57   | 2.23   | 3.90 | 0.01 |
| BSU01150 | <i>rpsJ</i> | 138.59 | 335.35 | 2.42 | 0.00 |
| BSU01160 | <i>rplC</i> | 144.86 | 213.82 | 1.48 | 0.00 |
| BSU01170 | <i>rplD</i> | 194.93 | 254.43 | 1.31 | 0.00 |
| BSU01180 | <i>rplW</i> | 258.54 | 310.07 | 1.20 | 0.13 |
| BSU01190 | <i>rplB</i> | 271.19 | 323.23 | 1.19 | 0.06 |
| BSU01200 | <i>rpsS</i> | 287.69 | 428.14 | 1.49 | 0.00 |
| BSU01210 | <i>rplV</i> | 267.56 | 453.78 | 1.70 | 0.00 |
| BSU01220 | <i>rpsC</i> | 243.14 | 441.98 | 1.82 | 0.01 |
| BSU01230 | <i>rplP</i> | 261.82 | 462.17 | 1.77 | 0.00 |
| BSU01240 | <i>rpmC</i> | 350.42 | 567.60 | 1.62 | 0.00 |
| BSU01250 | <i>rpsQ</i> | 356.79 | 577.52 | 1.62 | 0.00 |
| BSU01260 | <i>rplN</i> | 320.33 | 461.39 | 1.44 | 0.01 |
| BSU01270 | <i>rplX</i> | 322.50 | 402.91 | 1.25 | 0.05 |
| BSU01280 | <i>rplE</i> | 288.00 | 391.31 | 1.36 | 0.04 |
| BSU01290 | <i>rpsN</i> | 339.16 | 461.59 | 1.36 | 0.05 |
| BSU01300 | <i>rpsH</i> | 286.03 | 376.32 | 1.32 | 0.03 |
| BSU01310 | <i>rplF</i> | 261.44 | 425.42 | 1.63 | 0.05 |
| BSU01320 | <i>rplR</i> | 283.48 | 478.72 | 1.69 | 0.01 |
| BSU01330 | <i>rpsE</i> | 262.01 | 453.40 | 1.73 | 0.03 |
| BSU01340 | <i>rpmD</i> | 361.58 | 537.09 | 1.49 | 0.03 |
| BSU01350 | <i>rplO</i> | 343.17 | 465.77 | 1.36 | 0.04 |
| BSU01360 | <i>secY</i> | 252.47 | 379.44 | 1.50 | 0.03 |
| BSU01370 | <i>adk</i>  | 228.95 | 370.68 | 1.62 | 0.01 |
| BSU01380 | <i>mapA</i> | 201.00 | 345.36 | 1.72 | 0.01 |
| BSU01389 | <i>ybzG</i> | 258.85 | 434.76 | 1.68 | 0.02 |
| BSU01390 | <i>infA</i> | 261.30 | 457.40 | 1.75 | 0.01 |
| BSU01400 | <i>rpmJ</i> | 390.06 | 640.50 | 1.64 | 0.01 |
| BSU01410 | <i>rpsM</i> | 224.78 | 407.65 | 1.81 | 0.00 |
| BSU01420 | <i>rpsK</i> | 253.65 | 451.94 | 1.78 | 0.01 |
| BSU01430 | <i>rpoA</i> | 225.67 | 399.21 | 1.77 | 0.00 |
| BSU01440 | <i>rplQ</i> | 231.02 | 339.64 | 1.47 | 0.07 |
| BSU01450 | <i>cbiO</i> | 10.26  | 21.98  | 2.14 | 0.00 |
| BSU01460 | <i>cbiO</i> | 10.69  | 15.14  | 1.42 | 0.02 |
| BSU01470 | <i>ybaF</i> | 9.39   | 13.49  | 1.44 | 0.02 |
| BSU01480 | <i>truA</i> | 11.99  | 43.14  | 3.60 | 0.00 |
| BSU01490 | <i>rplM</i> | 67.24  | 112.47 | 1.67 | 0.00 |
| BSU01500 | <i>rpsI</i> | 88.71  | 117.95 | 1.33 | 0.05 |
| BSU01510 | <i>ybaJ</i> | 2.95   | 1.42   | 0.48 | 0.00 |
| BSU01540 | <i>salA</i> | 44.45  | 21.75  | 0.49 | 0.00 |

|          |              |       |       |      |      |
|----------|--------------|-------|-------|------|------|
| BSU01550 | <i>gerD</i>  | 1.92  | 5.75  | 3.00 | 0.03 |
| BSU01560 | <i>kbaA</i>  | 1.33  | 1.78  | 1.34 | 0.33 |
| BSU01570 | <i>ybaN</i>  | 0.92  | 1.59  | 1.73 | 0.01 |
| BSU01580 | <i>ybaR</i>  | 1.02  | 1.60  | 1.57 | 0.00 |
| BSU01590 | <i>ybaS</i>  | 1.38  | 1.40  | 1.01 | 0.90 |
| BSU01600 | <i>ybbA</i>  | 3.64  | 1.15  | 0.31 | 0.00 |
| BSU01610 | <i>feuC</i>  | 5.63  | 1.53  | 0.27 | 0.00 |
| BSU01620 | <i>feuB</i>  | 8.13  | 1.62  | 0.20 | 0.00 |
| BSU01630 | <i>feuA</i>  | 17.88 | 1.98  | 0.11 | 0.00 |
| BSU01640 | <i>ybbB</i>  | 1.51  | 0.56  | 0.37 | 0.00 |
| BSU01700 | <i>murQ</i>  | 1.07  | 0.37  | 0.35 | 0.00 |
| BSU01730 | <i>sigW</i>  | 35.17 | 33.48 | 0.95 | 0.66 |
| BSU01740 | <i>rsiW</i>  | 35.97 | 27.87 | 0.77 | 0.00 |
| BSU01750 | <i>ybbP</i>  | 2.72  | 2.64  | 0.97 | 0.76 |
| BSU01760 | <i>ybbR</i>  | 3.93  | 3.83  | 0.97 | 0.81 |
| BSU01770 | <i>glmM</i>  | 9.66  | 6.77  | 0.70 | 0.05 |
| BSU01780 | <i>glmS</i>  | 22.19 | 5.66  | 0.26 | 0.02 |
| BSU01910 | <i>skfA</i>  | 2.65  | 1.13  | 0.43 | 0.04 |
| BSU02019 | <i>ybzI</i>  | 7.83  | 8.07  | 1.03 | 0.87 |
| BSU02060 | <i>ybxG</i>  | 1.70  | 1.16  | 0.68 | 0.01 |
| BSU02100 | <i>cypC</i>  | 0.95  | 1.35  | 1.42 | 0.13 |
| BSU02110 | <i>ybyB</i>  | 16.62 | 11.81 | 0.71 | 0.02 |
| BSU02120 | <i>ybeC</i>  | 11.38 | 6.15  | 0.54 | 0.00 |
| BSU02130 | <i>glpQ</i>  | 30.70 | 12.68 | 0.41 | 0.00 |
| BSU02140 | <i>glpT</i>  | 20.51 | 12.39 | 0.60 | 0.01 |
| BSU02180 | <i>ybfE</i>  | 1.39  | 0.51  | 0.37 | 0.04 |
| BSU02190 | <i>ybfF</i>  | 1.43  | 0.93  | 0.66 | 0.39 |
| BSU02200 | <i>ybfG</i>  | 2.45  | 1.28  | 0.52 | 0.00 |
| BSU02230 | <i>purT</i>  | 3.48  | 1.18  | 0.34 | 0.00 |
| BSU02260 | <i>ybfK</i>  | 1.41  | 1.77  | 1.25 | 0.02 |
| BSU02270 | <i>pssA</i>  | 5.60  | 6.00  | 1.07 | 0.13 |
| BSU02280 | <i>ybfM</i>  | 6.59  | 5.74  | 0.87 | 0.27 |
| BSU02290 | <i>psd</i>   | 6.25  | 5.51  | 0.88 | 0.31 |
| BSU02300 | <i>ybfN</i>  | 1.30  | 1.70  | 1.31 | 0.01 |
| BSU02310 | <i>ybfO</i>  | 1.57  | 0.58  | 0.37 | 0.00 |
| BSU02330 | <i>ybfQ</i>  | 7.32  | 6.03  | 0.82 | 0.05 |
| BSU02350 | <i>nagP</i>  | 4.48  | 2.04  | 0.46 | 0.00 |
| BSU02360 | <i>nagBB</i> | 5.90  | 3.95  | 0.67 | 0.03 |
| BSU02380 | <i>ybgB</i>  | 1.22  | 1.13  | 0.92 | 0.52 |
| BSU02500 | <i>ycbG</i>  | 0.97  | 1.32  | 1.36 | 0.00 |
| BSU02520 | <i>ycbJ</i>  | 1.47  | 0.91  | 0.62 | 0.01 |
| BSU02530 | <i>rtpA</i>  | 0.69  | 1.12  | 1.62 | 0.02 |
| BSU02590 | <i>ycbP</i>  | 2.29  | 2.60  | 1.13 | 0.22 |
| BSU02670 | <i>lmrB</i>  | 0.48  | 1.08  | 2.25 | 0.00 |
| BSU02720 | <i>yccF</i>  | 2.58  | 5.32  | 2.06 | 0.00 |
| BSU02770 | <i>yccK</i>  | 1.24  | 0.28  | 0.22 | 0.00 |
| BSU02820 | <i>rapJ</i>  | 1.31  | 0.89  | 0.68 | 0.04 |
| BSU02830 | <i>ycdF</i>  | 0.76  | 2.31  | 3.03 | 0.01 |
| BSU02840 | <i>ycdG</i>  | 1.06  | 2.47  | 2.34 | 0.01 |
| BSU02850 | <i>adcA</i>  | 0.32  | 1.30  | 4.00 | 0.00 |

|          |              |        |        |      |      |
|----------|--------------|--------|--------|------|------|
| BSU02890 | <i>yceC</i>  | 48.41  | 36.95  | 0.76 | 0.03 |
| BSU02900 | <i>yceD</i>  | 47.63  | 42.73  | 0.90 | 0.46 |
| BSU02910 | <i>yceE</i>  | 49.89  | 42.76  | 0.86 | 0.26 |
| BSU02920 | <i>yceF</i>  | 53.25  | 37.01  | 0.70 | 0.01 |
| BSU02930 | <i>yceG</i>  | 8.27   | 7.10   | 0.86 | 0.09 |
| BSU02940 | <i>yceH</i>  | 8.56   | 6.56   | 0.77 | 0.06 |
| BSU02950 | <i>yceI</i>  | 1.01   | 0.98   | 0.97 | 0.87 |
| BSU02980 | <i>opuAA</i> | 1.70   | 3.73   | 2.19 | 0.00 |
| BSU02990 | <i>opuAB</i> | 3.58   | 5.42   | 1.51 | 0.00 |
| BSU03000 | <i>opuAC</i> | 5.49   | 7.15   | 1.30 | 0.04 |
| BSU03040 | <i>amyE</i>  | 2.16   | 1.93   | 0.89 | 0.54 |
| BSU03050 | <i>ldh</i>   | 458.71 | 195.15 | 0.43 | 0.02 |
| BSU03060 | <i>lctP</i>  | 243.59 | 134.80 | 0.55 | 0.10 |
| BSU03070 | <i>mdr</i>   | 1.13   | 3.65   | 3.22 | 0.00 |
| BSU03130 | <i>nadE</i>  | 21.95  | 11.36  | 0.52 | 0.00 |
| BSU03150 | <i>aroK</i>  | 1.84   | 0.49   | 0.27 | 0.00 |
| BSU03220 | <i>ycgO</i>  | 1.35   | 3.60   | 2.66 | 0.00 |
| BSU03240 | <i>ycgQ</i>  | 2.33   | 1.12   | 0.48 | 0.00 |
| BSU03270 | <i>ycgT</i>  | 3.36   | 2.33   | 0.69 | 0.01 |
| BSU03280 | <i>nasF</i>  | 5.27   | 3.17   | 0.60 | 0.00 |
| BSU03290 | <i>nasE</i>  | 3.33   | 2.45   | 0.73 | 0.14 |
| BSU03300 | <i>nasD</i>  | 1.28   | 0.67   | 0.52 | 0.02 |
| BSU03370 | <i>yckA</i>  | 3.97   | 4.08   | 1.03 | 0.54 |
| BSU03380 | <i>yckB</i>  | 2.41   | 3.57   | 1.48 | 0.01 |
| BSU03420 | <i>nin</i>   | 5.97   | 1.04   | 0.17 | 0.00 |
| BSU03430 | <i>nucA</i>  | 4.88   | 1.45   | 0.30 | 0.00 |
| BSU03450 | <i>hxlB</i>  | 1.24   | 0.97   | 0.78 | 0.17 |
| BSU03460 | <i>hxlA</i>  | 1.24   | 1.04   | 0.84 | 0.13 |
| BSU03480 | <i>srfAA</i> | 24.15  | 9.57   | 0.40 | 0.03 |
| BSU03490 | <i>srfAB</i> | 35.01  | 17.22  | 0.49 | 0.05 |
| BSU03500 | <i>comS</i>  | 56.24  | 31.34  | 0.56 | 0.04 |
| BSU03510 | <i>srfAC</i> | 32.05  | 16.62  | 0.52 | 0.04 |
| BSU03520 | <i>srfAD</i> | 38.01  | 17.12  | 0.45 | 0.01 |
| BSU03580 | <i>yczE</i>  | 0.86   | 1.10   | 1.28 | 0.31 |
| BSU03590 | <i>tcyC</i>  | 5.94   | 4.94   | 0.83 | 0.26 |
| BSU03600 | <i>tcyB</i>  | 5.56   | 5.17   | 0.93 | 0.07 |
| BSU03610 | <i>tcyA</i>  | 12.76  | 7.44   | 0.58 | 0.00 |
| BSU03670 | <i>dtpT</i>  | 3.28   | 3.18   | 0.97 | 0.70 |
| BSU03760 | <i>yclK</i>  | 1.33   | 1.13   | 0.85 | 0.05 |
| BSU03770 | <i>rapC</i>  | 3.99   | 2.57   | 0.64 | 0.07 |
| BSU03780 | <i>phrC</i>  | 22.37  | 3.48   | 0.16 | 0.02 |
| BSU03789 | <i>yczN</i>  | 38.52  | 3.15   | 0.08 | 0.00 |
| BSU03800 | <i>yclN</i>  | 8.79   | 14.35  | 1.63 | 0.01 |
| BSU03810 | <i>yclO</i>  | 11.45  | 12.41  | 1.08 | 0.06 |
| BSU03820 | <i>yclP</i>  | 16.04  | 18.27  | 1.14 | 0.10 |
| BSU03830 | <i>yclQ</i>  | 24.90  | 13.12  | 0.53 | 0.00 |
| BSU03840 | <i>ycnB</i>  | 0.94   | 1.91   | 2.03 | 0.02 |
| BSU03850 | <i>ycnC</i>  | 0.52   | 1.19   | 2.30 | 0.00 |
| BSU03860 | <i>ycnD</i>  | 4.44   | 1.82   | 0.41 | 0.00 |
| BSU03870 | <i>ycnE</i>  | 4.50   | 1.81   | 0.40 | 0.00 |

|          |             |       |       |      |      |
|----------|-------------|-------|-------|------|------|
| BSU03880 | <i>yczG</i> | 2.14  | 1.38  | 0.64 | 0.01 |
| BSU03910 | <i>gabD</i> | 4.57  | 3.02  | 0.66 | 0.04 |
| BSU03940 | <i>ycnI</i> | 2.77  | 3.89  | 1.40 | 0.14 |
| BSU03950 | <i>ycnJ</i> | 1.48  | 2.51  | 1.70 | 0.03 |
| BSU03960 | <i>ycnK</i> | 1.00  | 3.39  | 3.38 | 0.00 |
| BSU03970 | <i>ycnL</i> | 1.23  | 1.50  | 1.22 | 0.20 |
| BSU03981 | <i>mtIA</i> | 16.34 | 31.01 | 1.90 | 0.01 |
| BSU03982 | <i>mtIF</i> | 20.95 | 44.61 | 2.13 | 0.00 |
| BSU03990 | <i>mtID</i> | 17.90 | 37.28 | 2.08 | 0.00 |
| BSU04000 | <i>ycsA</i> | 7.77  | 6.27  | 0.81 | 0.08 |
| BSU04010 | <i>sipU</i> | 3.27  | 3.96  | 1.21 | 0.32 |
| BSU04020 | <i>yczH</i> | 2.61  | 3.05  | 1.17 | 0.12 |
| BSU04030 | <i>ycsD</i> | 2.80  | 2.60  | 0.93 | 0.32 |
| BSU04039 | <i>yczO</i> | 1.39  | 2.86  | 2.05 | 0.04 |
| BSU04040 | <i>ycsE</i> | 3.05  | 1.53  | 0.50 | 0.01 |
| BSU04050 | <i>ycsF</i> | 1.07  | 3.39  | 3.15 | 0.01 |
| BSU04060 | <i>ycsG</i> | 0.88  | 2.77  | 3.16 | 0.00 |
| BSU04070 | <i>ycsI</i> | 1.10  | 3.37  | 3.06 | 0.01 |
| BSU04080 | <i>kipI</i> | 1.15  | 2.97  | 2.59 | 0.00 |
| BSU04090 | <i>kipA</i> | 1.02  | 2.68  | 2.63 | 0.02 |
| BSU04100 | <i>kipR</i> | 1.14  | 2.52  | 2.22 | 0.02 |
| BSU04110 | <i>lipC</i> | 0.46  | 1.46  | 3.17 | 0.00 |
| BSU04120 | <i>yczI</i> | 3.90  | 10.33 | 2.65 | 0.05 |
| BSU04130 | <i>yczJ</i> | 1.54  | 2.32  | 1.51 | 0.00 |
| BSU04140 | <i>pbpC</i> | 6.30  | 4.48  | 0.71 | 0.02 |
| BSU04150 | <i>ycsN</i> | 11.42 | 5.17  | 0.45 | 0.01 |
| BSU04160 | <i>mtIR</i> | 2.83  | 3.18  | 1.12 | 0.09 |
| BSU04190 | <i>ydaD</i> | 0.66  | 1.43  | 2.18 | 0.02 |
| BSU04200 | <i>ydaE</i> | 1.06  | 1.83  | 1.73 | 0.01 |
| BSU04220 | <i>ydaG</i> | 12.91 | 14.00 | 1.08 | 0.74 |
| BSU04240 | <i>ydzA</i> | 4.50  | 2.19  | 0.49 | 0.01 |
| BSU04260 | <i>topB</i> | 2.98  | 3.44  | 1.16 | 0.34 |
| BSU04270 | <i>ydaJ</i> | 0.43  | 1.09  | 2.53 | 0.00 |
| BSU04320 | <i>ydaO</i> | 1.55  | 0.66  | 0.42 | 0.00 |
| BSU04340 | <i>ydaP</i> | 1.79  | 2.60  | 1.45 | 0.06 |
| BSU04359 | <i>ydzK</i> | 7.07  | 3.14  | 0.44 | 0.00 |
| BSU04360 | <i>mntH</i> | 27.83 | 5.57  | 0.20 | 0.00 |
| BSU04370 | <i>ydaS</i> | 4.43  | 3.74  | 0.85 | 0.32 |
| BSU04400 | <i>gsiB</i> | 5.31  | 11.81 | 2.23 | 0.01 |
| BSU04430 | <i>ydbD</i> | 1.34  | 1.52  | 1.14 | 0.26 |
| BSU04440 | <i>dctB</i> | 0.98  | 1.64  | 1.67 | 0.00 |
| BSU04470 | <i>dctP</i> | 5.73  | 6.36  | 1.11 | 0.61 |
| BSU04480 | <i>ydbI</i> | 3.06  | 2.78  | 0.91 | 0.25 |
| BSU04490 | <i>ydbJ</i> | 2.44  | 4.05  | 1.66 | 0.00 |
| BSU04500 | <i>ydbK</i> | 3.68  | 4.67  | 1.27 | 0.03 |
| BSU04510 | <i>ydbL</i> | 14.39 | 6.44  | 0.45 | 0.00 |
| BSU04520 | <i>ydbM</i> | 1.94  | 1.96  | 1.01 | 0.93 |
| BSU04530 | <i>ydbN</i> | 23.88 | 8.18  | 0.34 | 0.00 |
| BSU04540 | <i>ydbO</i> | 5.51  | 6.58  | 1.19 | 0.10 |
| BSU04550 | <i>ydbP</i> | 50.03 | 15.73 | 0.31 | 0.00 |



|          |              |        |        |      |      |
|----------|--------------|--------|--------|------|------|
| BSU04560 | <i>ddl</i>   | 11.50  | 6.03   | 0.52 | 0.00 |
| BSU04570 | <i>murF</i>  | 4.39   | 2.81   | 0.64 | 0.00 |
| BSU04580 | <i>cshA</i>  | 17.71  | 21.90  | 1.24 | 0.05 |
| BSU04590 | <i>ydbS</i>  | 16.61  | 14.35  | 0.86 | 0.03 |
| BSU04600 | <i>ydbT</i>  | 13.61  | 10.56  | 0.78 | 0.00 |
| BSU04610 | <i>ydcA</i>  | 1.61   | 1.94   | 1.20 | 0.00 |
| BSU04620 | <i>acpS</i>  | 1.86   | 2.27   | 1.22 | 0.05 |
| BSU04630 | <i>ydcC</i>  | 1.46   | 1.50   | 1.03 | 0.74 |
| BSU04640 | <i>alrA</i>  | 4.09   | 3.24   | 0.79 | 0.02 |
| BSU04650 | <i>endB</i>  | 29.97  | 48.69  | 1.62 | 0.03 |
| BSU04660 | <i>ndoA</i>  | 32.61  | 35.63  | 1.09 | 0.17 |
| BSU04670 | <i>rsbRA</i> | 3.37   | 3.30   | 0.98 | 0.76 |
| BSU04680 | <i>rsbS</i>  | 5.24   | 5.12   | 0.98 | 0.63 |
| BSU04690 | <i>rsbT</i>  | 5.24   | 5.20   | 0.99 | 0.93 |
| BSU04700 | <i>rsbU</i>  | 6.31   | 6.08   | 0.96 | 0.62 |
| BSU04710 | <i>rsbV</i>  | 34.31  | 45.86  | 1.34 | 0.01 |
| BSU04720 | <i>rsbW</i>  | 42.94  | 69.77  | 1.62 | 0.01 |
| BSU04730 | <i>sigB</i>  | 35.74  | 72.67  | 2.03 | 0.00 |
| BSU04740 | <i>rsbX</i>  | 25.62  | 60.40  | 2.36 | 0.00 |
| BSU04780 | <i>ydcl</i>  | 2.44   | 1.41   | 0.58 | 0.04 |
| BSU04790 | <i>ydcK</i>  | 0.54   | 2.29   | 4.26 | 0.01 |
| BSU05000 | <i>yddK</i>  | 5.25   | 0.80   | 0.15 | 0.01 |
| BSU05020 | <i>phrI</i>  | 1.55   | 0.31   | 0.20 | 0.00 |
| BSU05070 | <i>yddQ</i>  | 1.00   | 0.30   | 0.30 | 0.00 |
| BSU05099 | <i>ydzM</i>  | 1.03   | 0.49   | 0.48 | 0.02 |
| BSU05120 | <i>cspC</i>  | 117.01 | 134.30 | 1.15 | 0.68 |
| BSU05130 | <i>ydeB</i>  | 0.81   | 4.56   | 5.63 | 0.02 |
| BSU05260 | <i>ydeN</i>  | 1.14   | 0.76   | 0.67 | 0.02 |
| BSU05270 | <i>ydzF</i>  | 1.24   | 0.90   | 0.73 | 0.03 |
| BSU05280 | <i>ydeO</i>  | 2.19   | 1.57   | 0.71 | 0.02 |
| BSU05320 | <i>ydeS</i>  | 1.10   | 1.16   | 1.05 | 0.57 |
| BSU05329 | <i>ydzO</i>  | 1.57   | 1.32   | 0.84 | 0.43 |
| BSU05340 | <i>ydfA</i>  | 0.75   | 1.04   | 1.38 | 0.01 |
| BSU05400 | <i>ydfG</i>  | 7.40   | 1.29   | 0.17 | 0.00 |
| BSU05440 | <i>nap</i>   | 2.27   | 0.95   | 0.42 | 0.00 |
| BSU05529 | <i>ydzR</i>  | 1.40   | 0.17   | 0.12 | 0.00 |
| BSU05580 | <i>ydgC</i>  | 3.10   | 4.43   | 1.43 | 0.04 |
| BSU05590 | <i>ydgD</i>  | 2.80   | 6.00   | 2.14 | 0.00 |
| BSU05600 | <i>ydgE</i>  | 1.27   | 1.51   | 1.20 | 0.01 |
| BSU05620 | <i>ydgF</i>  | 2.75   | 2.12   | 0.77 | 0.01 |
| BSU05630 | <i>dinB</i>  | 1.25   | 0.89   | 0.71 | 0.05 |
| BSU05660 | <i>ydgI</i>  | 1.80   | 1.24   | 0.69 | 0.02 |
| BSU05670 | <i>ydgJ</i>  | 1.40   | 1.92   | 1.37 | 0.05 |
| BSU05680 | <i>ydgK</i>  | 0.89   | 1.26   | 1.41 | 0.00 |
| BSU05700 | <i>ydhC</i>  | 1.52   | 0.62   | 0.41 | 0.00 |
| BSU05720 | <i>ydhE</i>  | 2.06   | 0.92   | 0.45 | 0.00 |
| BSU05750 | <i>ydhG</i>  | 3.41   | 2.49   | 0.73 | 0.04 |
| BSU05790 | <i>ydhK</i>  | 2.33   | 2.64   | 1.13 | 0.16 |
| BSU05800 | <i>pbuE</i>  | 3.78   | 2.99   | 0.79 | 0.01 |
| BSU05810 | <i>gmuB</i>  | 2.51   | 1.89   | 0.75 | 0.05 |

|          |              |        |        |      |      |
|----------|--------------|--------|--------|------|------|
| BSU05820 | <i>gmuA</i>  | 3.54   | 2.09   | 0.59 | 0.06 |
| BSU05830 | <i>gmuC</i>  | 2.41   | 1.34   | 0.56 | 0.00 |
| BSU05840 | <i>gmuD</i>  | 2.51   | 1.10   | 0.44 | 0.00 |
| BSU05850 | <i>gmuR</i>  | 3.21   | 1.19   | 0.37 | 0.00 |
| BSU05860 | <i>gmuE</i>  | 2.80   | 1.03   | 0.37 | 0.00 |
| BSU05870 | <i>gmuF</i>  | 2.83   | 0.72   | 0.26 | 0.00 |
| BSU05880 | <i>gmuG</i>  | 3.60   | 0.59   | 0.17 | 0.00 |
| BSU05900 | <i>thiL</i>  | 0.92   | 2.13   | 2.31 | 0.00 |
| BSU05910 | <i>ydiB</i>  | 1.37   | 2.81   | 2.04 | 0.00 |
| BSU05920 | <i>ydiC</i>  | 1.72   | 3.39   | 1.97 | 0.00 |
| BSU05930 | <i>rimI</i>  | 2.32   | 4.73   | 2.04 | 0.01 |
| BSU05940 | <i>gcp</i>   | 2.49   | 4.59   | 1.85 | 0.02 |
| BSU05950 | <i>ydiF</i>  | 2.00   | 1.39   | 0.69 | 0.05 |
| BSU05960 | <i>moaC</i>  | 2.49   | 4.92   | 1.97 | 0.00 |
| BSU05970 | <i>ydiH</i>  | 4.72   | 5.46   | 1.16 | 0.25 |
| BSU05980 | <i>tatAY</i> | 15.64  | 12.26  | 0.78 | 0.01 |
| BSU05990 | <i>tatCY</i> | 9.88   | 6.62   | 0.67 | 0.00 |
| BSU06000 | <i>ydiK</i>  | 4.17   | 2.31   | 0.55 | 0.02 |
| BSU06010 | <i>ydiL</i>  | 3.52   | 2.41   | 0.68 | 0.01 |
| BSU06020 | <i>groES</i> | 300.72 | 121.40 | 0.40 | 0.00 |
| BSU06030 | <i>groEL</i> | 267.50 | 55.82  | 0.21 | 0.00 |
| BSU06040 | <i>ydiM</i>  | 1.09   | 1.29   | 1.19 | 0.39 |
| BSU06060 | <i>ydiO</i>  | 2.46   | 2.08   | 0.85 | 0.53 |
| BSU06070 | <i>ydiP</i>  | 6.41   | 3.95   | 0.62 | 0.01 |
| BSU06090 | <i>ydiR</i>  | 3.76   | 1.49   | 0.39 | 0.00 |
| BSU06100 | <i>ydiS</i>  | 6.36   | 2.45   | 0.39 | 0.01 |
| BSU06110 | <i>ydjA</i>  | 6.36   | 2.43   | 0.38 | 0.04 |
| BSU06170 | <i>ydjE</i>  | 5.57   | 1.08   | 0.19 | 0.00 |
| BSU06180 | <i>pspA</i>  | 5.85   | 5.13   | 0.88 | 0.23 |
| BSU06190 | <i>ydjG</i>  | 5.74   | 5.71   | 1.00 | 0.95 |
| BSU06200 | <i>ydjH</i>  | 5.32   | 5.89   | 1.11 | 0.23 |
| BSU06210 | <i>ydjI</i>  | 6.68   | 5.41   | 0.81 | 0.07 |
| BSU06240 | <i>bdhA</i>  | 43.68  | 11.02  | 0.25 | 0.00 |
| BSU06250 | <i>ydjM</i>  | 1.12   | 1.43   | 1.27 | 0.11 |
| BSU06270 | <i>ydjO</i>  | 13.32  | 18.36  | 1.38 | 0.02 |
| BSU06280 | <i>ydjP</i>  | 7.62   | 6.74   | 0.88 | 0.13 |
| BSU06290 | <i>yeaA</i>  | 7.39   | 3.89   | 0.53 | 0.02 |
| BSU06340 | <i>yeaD</i>  | 0.98   | 1.50   | 1.54 | 0.03 |
| BSU06350 | <i>yebA</i>  | 1.49   | 1.44   | 0.97 | 0.63 |
| BSU06360 | <i>guaA</i>  | 9.93   | 5.73   | 0.58 | 0.03 |
| BSU06370 | <i>pbuG</i>  | 2.60   | 2.70   | 1.04 | 0.83 |
| BSU06380 | <i>yebC</i>  | 1.43   | 1.43   | 1.00 | 0.97 |
| BSU06390 | <i>yebD</i>  | 1.12   | 0.19   | 0.17 | 0.00 |
| BSU06400 | <i>yebE</i>  | 1.46   | 1.61   | 1.10 | 0.24 |
| BSU06410 | <i>yebG</i>  | 2.62   | 2.36   | 0.90 | 0.45 |
| BSU06420 | <i>purE</i>  | 1.26   | 1.00   | 0.79 | 0.28 |
| BSU06430 | <i>purK</i>  | 1.64   | 1.08   | 0.66 | 0.07 |
| BSU06440 | <i>purB</i>  | 3.31   | 2.03   | 0.61 | 0.04 |
| BSU06450 | <i>purC</i>  | 1.79   | 0.94   | 0.52 | 0.02 |
| BSU06460 | <i>purS</i>  | 2.34   | 1.33   | 0.57 | 0.07 |

|          |              |       |       |      |      |
|----------|--------------|-------|-------|------|------|
| BSU06470 | <i>purQ</i>  | 1.72  | 1.09  | 0.63 | 0.13 |
| BSU06480 | <i>purL</i>  | 1.33  | 0.65  | 0.49 | 0.11 |
| BSU06490 | <i>purF</i>  | 1.56  | 0.65  | 0.41 | 0.09 |
| BSU06510 | <i>purN</i>  | 1.10  | 0.59  | 0.54 | 0.10 |
| BSU06560 | <i>yerA</i>  | 2.90  | 9.66  | 3.33 | 0.00 |
| BSU06570 | <i>yerB</i>  | 10.10 | 36.80 | 3.64 | 0.00 |
| BSU06580 | <i>yerC</i>  | 13.73 | 21.82 | 1.59 | 0.04 |
| BSU06590 | <i>yerD</i>  | 0.69  | 1.11  | 1.60 | 0.00 |
| BSU06610 | <i>pcrA</i>  | 2.01  | 2.50  | 1.24 | 0.12 |
| BSU06620 | <i>ligA</i>  | 4.05  | 5.40  | 1.33 | 0.08 |
| BSU06630 | <i>yerH</i>  | 7.70  | 6.71  | 0.87 | 0.06 |
| BSU06640 | <i>yerI</i>  | 3.16  | 1.82  | 0.58 | 0.00 |
| BSU06660 | <i>opuE</i>  | 1.86  | 7.37  | 3.96 | 0.00 |
| BSU06670 | <i>gatC</i>  | 9.19  | 15.67 | 1.70 | 0.00 |
| BSU06680 | <i>gatA</i>  | 15.10 | 20.10 | 1.33 | 0.08 |
| BSU06690 | <i>gatB</i>  | 29.98 | 26.62 | 0.89 | 0.17 |
| BSU06710 | <i>swrC</i>  | 5.55  | 5.53  | 1.00 | 0.97 |
| BSU06720 | <i>yerQ</i>  | 3.84  | 3.80  | 0.99 | 0.91 |
| BSU06730 | <i>yefA</i>  | 1.29  | 1.99  | 1.54 | 0.08 |
| BSU06770 | <i>yeeB</i>  | 1.42  | 1.80  | 1.27 | 0.26 |
| BSU06780 | <i>yeeC</i>  | 1.35  | 1.73  | 1.28 | 0.35 |
| BSU06790 | <i>yeeD</i>  | 0.93  | 1.73  | 1.85 | 0.04 |
| BSU06800 | <i>yezA</i>  | 1.26  | 1.67  | 1.33 | 0.48 |
| BSU06811 | <i>yezG</i>  | 1.49  | 0.90  | 0.60 | 0.12 |
| BSU06840 | <i>yeel</i>  | 7.80  | 4.39  | 0.56 | 0.00 |
| BSU06860 | <i>yezE</i>  | 2.92  | 8.40  | 2.88 | 0.00 |
| BSU06920 | <i>yesJ</i>  | 2.93  | 3.78  | 1.29 | 0.16 |
| BSU06930 | <i>yesK</i>  | 0.25  | 1.07  | 4.30 | 0.00 |
| BSU07150 | <i>yetG</i>  | 25.79 | 13.57 | 0.53 | 0.00 |
| BSU07160 | <i>yetH</i>  | 2.40  | 1.00  | 0.42 | 0.00 |
| BSU07200 | <i>yetI</i>  | 8.64  | 12.78 | 1.48 | 0.02 |
| BSU07210 | <i>yetK</i>  | 1.08  | 1.34  | 1.24 | 0.24 |
| BSU07260 | <i>ltaSA</i> | 11.98 | 5.37  | 0.45 | 0.00 |
| BSU07320 | <i>yfnC</i>  | 1.44  | 0.81  | 0.56 | 0.04 |
| BSU07350 | <i>yfmT</i>  | 4.21  | 0.31  | 0.07 | 0.00 |
| BSU07360 | <i>yfmS</i>  | 4.92  | 0.36  | 0.07 | 0.00 |
| BSU07370 | <i>yfmR</i>  | 2.47  | 2.24  | 0.91 | 0.34 |
| BSU07380 | <i>yfmQ</i>  | 21.76 | 16.00 | 0.74 | 0.02 |
| BSU07390 | <i>yfmP</i>  | 0.71  | 1.28  | 1.80 | 0.01 |
| BSU07420 | <i>yfmM</i>  | 1.31  | 1.32  | 1.00 | 0.99 |
| BSU07430 | <i>yfmL</i>  | 0.90  | 1.17  | 1.29 | 0.05 |
| BSU07450 | <i>yfmJ</i>  | 5.27  | 1.57  | 0.30 | 0.00 |
| BSU07490 | <i>yfmF</i>  | 4.79  | 2.86  | 0.60 | 0.00 |
| BSU07500 | <i>yfmE</i>  | 1.91  | 4.25  | 2.23 | 0.00 |
| BSU07510 | <i>yfmD</i>  | 1.12  | 1.29  | 1.15 | 0.21 |
| BSU07520 | <i>yfmC</i>  | 18.84 | 5.96  | 0.32 | 0.00 |
| BSU07550 | <i>yfIT</i>  | 5.42  | 6.77  | 1.25 | 0.02 |
| BSU07560 | <i>pel</i>   | 13.61 | 3.01  | 0.22 | 0.00 |
| BSU07640 | <i>yfIL</i>  | 0.95  | 1.03  | 1.08 | 0.50 |
| BSU07650 | <i>yfIK</i>  | 1.07  | 0.89  | 0.83 | 0.20 |

|          |             |       |       |      |      |
|----------|-------------|-------|-------|------|------|
| BSU07660 | <i>yflJ</i> | 2.56  | 2.61  | 1.02 | 0.85 |
| BSU07670 | <i>yflI</i> | 3.15  | 3.02  | 0.96 | 0.80 |
| BSU07680 | <i>yflH</i> | 7.28  | 4.49  | 0.62 | 0.01 |
| BSU07690 | <i>yflG</i> | 5.08  | 3.94  | 0.78 | 0.10 |
| BSU07700 | <i>nagP</i> | 5.29  | 3.57  | 0.68 | 0.00 |
| BSU07710 | <i>yflE</i> | 9.36  | 8.26  | 0.88 | 0.08 |
| BSU07750 | <i>yflA</i> | 0.61  | 1.90  | 3.11 | 0.00 |
| BSU07760 | <i>yfkT</i> | 0.57  | 1.64  | 2.89 | 0.00 |
| BSU07770 | <i>yfkS</i> | 0.35  | 1.76  | 5.07 | 0.00 |
| BSU07800 | <i>treP</i> | 23.61 | 30.51 | 1.29 | 0.13 |
| BSU07810 | <i>treA</i> | 20.13 | 29.02 | 1.44 | 0.02 |
| BSU07820 | <i>treR</i> | 33.93 | 35.28 | 1.04 | 0.70 |
| BSU07830 | <i>yfkO</i> | 10.43 | 11.45 | 1.10 | 0.07 |
| BSU07850 | <i>yfkM</i> | 7.36  | 5.78  | 0.78 | 0.08 |
| BSU07870 | <i>yfkK</i> | 1.29  | 0.88  | 0.68 | 0.03 |
| BSU07880 | <i>yfkJ</i> | 3.22  | 5.89  | 1.83 | 0.00 |
| BSU07890 | <i>yfkI</i> | 4.85  | 8.14  | 1.68 | 0.01 |
| BSU07900 | <i>yfkH</i> | 3.79  | 5.66  | 1.49 | 0.02 |
| BSU07920 | <i>yfkE</i> | 1.56  | 2.69  | 1.72 | 0.03 |
| BSU07930 | <i>yfkD</i> | 1.66  | 2.72  | 1.64 | 0.01 |
| BSU07940 | <i>yfkC</i> | 3.48  | 2.49  | 0.72 | 0.02 |
| BSU07955 | <i>yfkA</i> | 1.38  | 1.77  | 1.28 | 0.03 |
| BSU08000 | <i>yfiQ</i> | 1.07  | 2.02  | 1.89 | 0.00 |
| BSU08020 | <i>yfiO</i> | 1.94  | 1.78  | 0.92 | 0.52 |
| BSU08030 | <i>dusC</i> | 0.71  | 1.15  | 1.61 | 0.00 |
| BSU08120 | <i>yfiF</i> | 0.96  | 1.02  | 1.07 | 0.77 |
| BSU08180 | <i>malA</i> | 1.15  | 0.31  | 0.27 | 0.00 |
| BSU08220 | <i>yfiC</i> | 2.41  | 1.78  | 0.74 | 0.04 |
| BSU08340 | <i>padR</i> | 1.03  | 0.84  | 0.81 | 0.05 |
| BSU08350 | <i>estB</i> | 1.33  | 0.70  | 0.52 | 0.01 |
| BSU08390 | <i>yfiT</i> | 2.72  | 1.46  | 0.54 | 0.00 |
| BSU08425 | <i>mprF</i> | 2.11  | 2.40  | 1.14 | 0.14 |
| BSU08440 | <i>yfiY</i> | 17.12 | 5.22  | 0.31 | 0.00 |
| BSU08450 | <i>yfiZ</i> | 3.18  | 2.86  | 0.90 | 0.20 |
| BSU08460 | <i>yfhA</i> | 4.95  | 4.04  | 0.82 | 0.19 |
| BSU08470 | <i>yfhB</i> | 1.21  | 0.34  | 0.28 | 0.00 |
| BSU08480 | <i>yfhC</i> | 27.20 | 7.82  | 0.29 | 0.00 |
| BSU08490 | <i>yfhD</i> | 1.55  | 1.94  | 1.25 | 0.41 |
| BSU08500 | <i>yfhE</i> | 1.36  | 1.56  | 1.14 | 0.61 |
| BSU08510 | <i>yfhF</i> | 0.84  | 1.13  | 1.34 | 0.03 |
| BSU08520 | <i>recX</i> | 1.22  | 1.52  | 1.25 | 0.03 |
| BSU08530 | <i>yfhH</i> | 2.14  | 2.00  | 0.93 | 0.61 |
| BSU08560 | <i>yfhJ</i> | 2.08  | 2.17  | 1.04 | 0.73 |
| BSU08570 | <i>yfhK</i> | 4.00  | 4.26  | 1.07 | 0.37 |
| BSU08580 | <i>yfhL</i> | 8.55  | 7.38  | 0.86 | 0.35 |
| BSU08590 | <i>yfhM</i> | 4.34  | 4.88  | 1.12 | 0.30 |
| BSU08600 | <i>csbB</i> | 10.81 | 7.80  | 0.72 | 0.09 |
| BSU08610 | <i>yfhO</i> | 4.72  | 3.33  | 0.71 | 0.00 |
| BSU08620 | <i>yfhP</i> | 1.24  | 1.28  | 1.03 | 0.59 |
| BSU08630 | <i>yfhQ</i> | 2.29  | 3.61  | 1.57 | 0.00 |

|          |              |         |        |       |      |
|----------|--------------|---------|--------|-------|------|
| BSU08640 | <i>yfhS</i>  | 5.95    | 15.89  | 2.67  | 0.00 |
| BSU08650 | <i>fabL</i>  | 6.15    | 6.92   | 1.13  | 0.13 |
| BSU08660 | <i>sspE</i>  | 12.27   | 11.84  | 0.97  | 0.78 |
| BSU08680 | <i>ygaC</i>  | 3.68    | 3.83   | 1.04  | 0.45 |
| BSU08690 | <i>ygaD</i>  | 1.60    | 2.46   | 1.54  | 0.00 |
| BSU08700 | <i>ygaE</i>  | 1.12    | 3.41   | 3.05  | 0.00 |
| BSU08710 | <i>gsaB</i>  | 5.15    | 4.44   | 0.86  | 0.01 |
| BSU08720 | <i>ygaF</i>  | 1.46    | 0.81   | 0.55  | 0.02 |
| BSU08730 | <i>perR</i>  | 22.23   | 13.43  | 0.60  | 0.03 |
| BSU08740 | <i>ygzB</i>  | 2.67    | 2.09   | 0.78  | 0.11 |
| BSU08750 | <i>ygxA</i>  | 3.61    | 1.26   | 0.35  | 0.00 |
| BSU08760 | <i>spo0M</i> | 37.75   | 13.31  | 0.35  | 0.00 |
| BSU08820 | <i>katA</i>  | 4.88    | 0.94   | 0.19  | 0.00 |
| BSU08890 | <i>ygaO</i>  | 0.95    | 1.43   | 1.50  | 0.01 |
| BSU08899 | <i>ygzD</i>  | 1.11    | 1.62   | 1.46  | 0.01 |
| BSU08900 | <i>yhxB</i>  | 0.87    | 1.49   | 1.71  | 0.01 |
| BSU08930 | <i>cspR</i>  | 5.70    | 3.02   | 0.53  | 0.00 |
| BSU08990 | <i>yhbl</i>  | 0.73    | 7.72   | 10.51 | 0.00 |
| BSU09000 | <i>yhbJ</i>  | 0.93    | 5.76   | 6.19  | 0.00 |
| BSU09010 | <i>yhcA</i>  | 1.40    | 6.65   | 4.76  | 0.00 |
| BSU09020 | <i>yhcB</i>  | 2.63    | 9.89   | 3.76  | 0.00 |
| BSU09030 | <i>yhcC</i>  | 2.83    | 8.47   | 2.99  | 0.00 |
| BSU09080 | <i>yhcH</i>  | 1.15    | 1.45   | 1.26  | 0.06 |
| BSU09090 | <i>yhcl</i>  | 2.19    | 1.96   | 0.90  | 0.15 |
| BSU09100 | <i>cspB</i>  | 1037.55 | 637.01 | 0.61  | 0.04 |
| BSU09110 | <i>yhcl</i>  | 2.12    | 2.46   | 1.16  | 0.12 |
| BSU09120 | <i>yhcK</i>  | 0.83    | 1.14   | 1.37  | 0.06 |
| BSU09230 | <i>yhcV</i>  | 1.00    | 1.28   | 1.27  | 0.16 |
| BSU09240 | <i>yhcW</i>  | 2.05    | 1.69   | 0.82  | 0.08 |
| BSU09250 | <i>yhcX</i>  | 4.61    | 2.98   | 0.65  | 0.00 |
| BSU09260 | <i>yhxA</i>  | 1.24    | 1.07   | 0.87  | 0.30 |
| BSU09270 | <i>glpP</i>  | 2.44    | 1.55   | 0.64  | 0.00 |
| BSU09280 | <i>glpF</i>  | 1.74    | 38.12  | 21.87 | 0.00 |
| BSU09290 | <i>glpK</i>  | 5.65    | 52.14  | 9.23  | 0.00 |
| BSU09300 | <i>glpD</i>  | 3.59    | 42.04  | 11.70 | 0.00 |
| BSU09310 | <i>pgcA</i>  | 16.64   | 22.47  | 1.35  | 0.01 |
| BSU09370 | <i>lytF</i>  | 3.42    | 0.38   | 0.11  | 0.00 |
| BSU09380 | <i>nsrR</i>  | 1.48    | 1.02   | 0.69  | 0.02 |
| BSU09420 | <i>lytE</i>  | 3.12    | 0.98   | 0.32  | 0.00 |
| BSU09450 | <i>yhdF</i>  | 1.15    | 1.11   | 0.97  | 0.78 |
| BSU09470 | <i>yhdH</i>  | 1.46    | 2.50   | 1.71  | 0.01 |
| BSU09500 | <i>yhdK</i>  | 5.40    | 2.13   | 0.39  | 0.00 |
| BSU09510 | <i>yhdL</i>  | 2.98    | 1.75   | 0.59  | 0.00 |
| BSU09520 | <i>sigM</i>  | 1.77    | 1.39   | 0.79  | 0.06 |
| BSU09530 | <i>yhdN</i>  | 4.99    | 6.62   | 1.33  | 0.02 |
| BSU09540 | <i>plsC</i>  | 7.49    | 4.29   | 0.57  | 0.00 |
| BSU09550 | <i>yhdP</i>  | 3.11    | 2.55   | 0.82  | 0.01 |
| BSU09560 | <i>cueR</i>  | 2.01    | 1.91   | 0.95  | 0.35 |
| BSU09570 | <i>yhdR</i>  | 1.05    | 0.43   | 0.41  | 0.00 |
| BSU09590 | <i>yhdT</i>  | 1.64    | 1.49   | 0.91  | 0.45 |

|          |              |       |       |      |      |
|----------|--------------|-------|-------|------|------|
| BSU09640 | <i>yhdY</i>  | 1.05  | 1.48  | 1.41 | 0.00 |
| BSU09650 | <i>yhdZ</i>  | 1.06  | 0.78  | 0.73 | 0.03 |
| BSU09660 | <i>yheN</i>  | 2.66  | 3.25  | 1.22 | 0.01 |
| BSU09670 | <i>dat</i>   | 1.98  | 1.39  | 0.70 | 0.05 |
| BSU09680 | <i>nhaC</i>  | 0.50  | 1.36  | 2.73 | 0.00 |
| BSU09690 | <i>nhaX</i>  | 5.20  | 5.04  | 0.97 | 0.86 |
| BSU09730 | <i>yheG</i>  | 2.06  | 3.33  | 1.61 | 0.00 |
| BSU09750 | <i>sspB</i>  | 2.67  | 2.70  | 1.01 | 0.94 |
| BSU09790 | <i>yheB</i>  | 2.18  | 1.53  | 0.70 | 0.00 |
| BSU09800 | <i>yheA</i>  | 34.73 | 10.95 | 0.32 | 0.00 |
| BSU09850 | <i>yhaU</i>  | 0.53  | 1.12  | 2.13 | 0.00 |
| BSU09860 | <i>khtT</i>  | 0.45  | 1.08  | 2.40 | 0.00 |
| BSU09870 | <i>khtS</i>  | 1.53  | 8.30  | 5.43 | 0.00 |
| BSU09880 | <i>yhaR</i>  | 1.58  | 0.11  | 0.07 | 0.00 |
| BSU09890 | <i>natA</i>  | 1.32  | 1.33  | 1.00 | 0.97 |
| BSU09900 | <i>natB</i>  | 2.10  | 1.62  | 0.77 | 0.05 |
| BSU09910 | <i>yhaO</i>  | 0.74  | 1.32  | 1.78 | 0.01 |
| BSU09920 | <i>yhaN</i>  | 1.54  | 1.67  | 1.09 | 0.28 |
| BSU09930 | <i>yhaM</i>  | 5.23  | 3.26  | 0.62 | 0.00 |
| BSU09950 | <i>prsA</i>  | 14.51 | 10.80 | 0.74 | 0.08 |
| BSU09958 | <i>yhze</i>  | 6.86  | 5.04  | 0.74 | 0.28 |
| BSU09980 | <i>yhal</i>  | 5.38  | 3.25  | 0.61 | 0.02 |
| BSU09990 | <i>hpr</i>   | 5.35  | 2.87  | 0.54 | 0.00 |
| BSU10000 | <i>yhaH</i>  | 2.70  | 2.31  | 0.85 | 0.09 |
| BSU10010 | <i>trpP</i>  | 12.81 | 7.77  | 0.61 | 0.02 |
| BSU10020 | <i>serC</i>  | 4.94  | 1.70  | 0.35 | 0.00 |
| BSU10030 | <i>hinT</i>  | 19.55 | 5.63  | 0.29 | 0.00 |
| BSU10050 | <i>ecsB</i>  | 2.64  | 2.56  | 0.97 | 0.63 |
| BSU10060 | <i>ecsC</i>  | 4.81  | 3.12  | 0.65 | 0.00 |
| BSU10100 | <i>yhgC</i>  | 12.31 | 5.46  | 0.44 | 0.00 |
| BSU10120 | <i>hemE</i>  | 5.13  | 4.19  | 0.82 | 0.14 |
| BSU10130 | <i>hemH</i>  | 12.51 | 7.94  | 0.64 | 0.01 |
| BSU10140 | <i>hemY</i>  | 9.81  | 6.69  | 0.68 | 0.09 |
| BSU10150 | <i>yhgD</i>  | 1.02  | 1.55  | 1.51 | 0.00 |
| BSU10160 | <i>yhgE</i>  | 1.15  | 1.17  | 1.02 | 0.59 |
| BSU10170 | <i>fabHB</i> | 1.94  | 4.33  | 2.23 | 0.01 |
| BSU10200 | <i>yhfE</i>  | 5.46  | 2.17  | 0.40 | 0.00 |
| BSU10210 | <i>yhfF</i>  | 7.24  | 2.61  | 0.36 | 0.00 |
| BSU10220 | <i>gltT</i>  | 11.59 | 9.83  | 0.85 | 0.01 |
| BSU10240 | <i>yhfl</i>  | 5.48  | 4.46  | 0.81 | 0.09 |
| BSU10250 | <i>yhfJ</i>  | 8.74  | 5.50  | 0.63 | 0.00 |
| BSU10260 | <i>yhfK</i>  | 14.86 | 7.32  | 0.49 | 0.00 |
| BSU10310 | <i>yhfO</i>  | 1.08  | 0.68  | 0.63 | 0.01 |
| BSU10320 | <i>yhfP</i>  | 5.12  | 3.11  | 0.61 | 0.02 |
| BSU10330 | <i>yhfQ</i>  | 8.60  | 6.52  | 0.76 | 0.04 |
| BSU10340 | <i>phoE</i>  | 1.46  | 1.15  | 0.79 | 0.08 |
| BSU10380 | <i>hemAT</i> | 1.33  | 0.12  | 0.09 | 0.00 |
| BSU10410 | <i>yhzc</i>  | 1.59  | 0.48  | 0.30 | 0.00 |
| BSU10440 | <i>yhjA</i>  | 36.75 | 4.66  | 0.13 | 0.00 |
| BSU10480 | <i>yhjE</i>  | 1.66  | 5.55  | 3.34 | 0.00 |

|          |              |       |       |      |      |
|----------|--------------|-------|-------|------|------|
| BSU10490 | <i>sipV</i>  | 2.11  | 4.02  | 1.90 | 0.00 |
| BSU10620 | <i>addB</i>  | 1.54  | 1.75  | 1.14 | 0.31 |
| BSU10630 | <i>addA</i>  | 3.22  | 3.19  | 0.99 | 0.94 |
| BSU10640 | <i>sbcD</i>  | 1.97  | 2.32  | 1.18 | 0.42 |
| BSU10650 | <i>sbcC</i>  | 2.51  | 2.58  | 1.03 | 0.84 |
| BSU10660 | <i>yisB</i>  | 4.01  | 3.23  | 0.81 | 0.13 |
| BSU10730 | <i>yisI</i>  | 0.40  | 1.82  | 4.54 | 0.04 |
| BSU10750 | <i>yisK</i>  | 3.62  | 0.75  | 0.21 | 0.00 |
| BSU10760 | <i>yisL</i>  | 8.48  | 3.15  | 0.37 | 0.00 |
| BSU10770 | <i>wprA</i>  | 18.85 | 4.97  | 0.26 | 0.00 |
| BSU10860 | <i>yisT</i>  | 2.59  | 0.25  | 0.09 | 0.00 |
| BSU10990 | <i>yitH</i>  | 1.55  | 0.82  | 0.53 | 0.00 |
| BSU11020 | <i>yitK</i>  | 1.49  | 0.65  | 0.44 | 0.00 |
| BSU11030 | <i>yitL</i>  | 1.29  | 1.83  | 1.43 | 0.02 |
| BSU11110 | <i>yitS</i>  | 1.34  | 1.21  | 0.91 | 0.07 |
| BSU11120 | <i>yitT</i>  | 2.48  | 2.42  | 0.97 | 0.75 |
| BSU11130 | <i>ipi</i>   | 3.72  | 1.95  | 0.52 | 0.00 |
| BSU11139 | <i>yizC</i>  | 2.83  | 2.01  | 0.71 | 0.02 |
| BSU11140 | <i>yitU</i>  | 1.40  | 0.85  | 0.61 | 0.01 |
| BSU11150 | <i>yitV</i>  | 1.65  | 1.80  | 1.09 | 0.46 |
| BSU11160 | <i>yitW</i>  | 6.65  | 5.36  | 0.81 | 0.21 |
| BSU11170 | <i>yitY</i>  | 1.04  | 1.30  | 1.24 | 0.02 |
| BSU11180 | <i>yitZ</i>  | 1.60  | 1.15  | 0.72 | 0.01 |
| BSU11270 | <i>yjzD</i>  | 7.40  | 3.72  | 0.50 | 0.25 |
| BSU11300 | <i>med</i>   | 4.97  | 5.20  | 1.05 | 0.65 |
| BSU11310 | <i>comZ</i>  | 12.33 | 9.23  | 0.75 | 0.01 |
| BSU11320 | <i>yjzB</i>  | 0.63  | 2.46  | 3.91 | 0.00 |
| BSU11330 | <i>fabHA</i> | 4.63  | 8.19  | 1.77 | 0.00 |
| BSU11340 | <i>fabF</i>  | 11.96 | 17.36 | 1.45 | 0.00 |
| BSU11420 | <i>trpS</i>  | 5.93  | 2.64  | 0.45 | 0.00 |
| BSU11430 | <i>oppA</i>  | 7.60  | 1.65  | 0.22 | 0.00 |
| BSU11440 | <i>oppB</i>  | 1.53  | 0.80  | 0.52 | 0.01 |
| BSU11450 | <i>oppC</i>  | 1.68  | 0.91  | 0.54 | 0.02 |
| BSU11460 | <i>oppD</i>  | 1.93  | 0.91  | 0.47 | 0.02 |
| BSU11470 | <i>oppF</i>  | 2.34  | 0.92  | 0.39 | 0.03 |
| BSU11490 | <i>yjbC</i>  | 23.23 | 17.34 | 0.75 | 0.15 |
| BSU11500 | <i>spxA</i>  | 71.03 | 28.22 | 0.40 | 0.00 |
| BSU11520 | <i>mecA</i>  | 11.15 | 9.30  | 0.83 | 0.02 |
| BSU11540 | <i>pepF</i>  | 9.42  | 5.31  | 0.56 | 0.00 |
| BSU11550 | <i>yjbH</i>  | 3.64  | 2.62  | 0.72 | 0.05 |
| BSU11560 | <i>yjbI</i>  | 2.05  | 1.75  | 0.85 | 0.06 |
| BSU11570 | <i>yjbJ</i>  | 4.81  | 0.71  | 0.15 | 0.00 |
| BSU11590 | <i>yjbL</i>  | 4.58  | 2.77  | 0.61 | 0.01 |
| BSU11600 | <i>yjbM</i>  | 6.05  | 3.80  | 0.63 | 0.00 |
| BSU11610 | <i>ppnKA</i> | 7.09  | 4.01  | 0.57 | 0.00 |
| BSU11620 | <i>yjbO</i>  | 8.73  | 4.63  | 0.53 | 0.00 |
| BSU11680 | <i>thiS</i>  | 0.33  | 1.21  | 3.69 | 0.00 |
| BSU11690 | <i>thiG</i>  | 0.30  | 1.05  | 3.50 | 0.00 |
| BSU11700 | <i>thiF</i>  | 0.30  | 1.23  | 4.11 | 0.00 |
| BSU11710 | <i>yjbV</i>  | 0.36  | 1.62  | 4.48 | 0.00 |

|          |               |       |       |       |      |
|----------|---------------|-------|-------|-------|------|
| BSU11720 | <i>fabI</i>   | 20.59 | 20.04 | 0.97  | 0.83 |
| BSU11740 | <i>cotZ</i>   | 0.20  | 1.88  | 9.20  | 0.00 |
| BSU11750 | <i>cotY</i>   | 0.36  | 2.25  | 6.24  | 0.00 |
| BSU11760 | <i>cotX</i>   | 3.90  | 4.00  | 1.03  | 0.78 |
| BSU11770 | <i>cotW</i>   | 1.36  | 2.44  | 1.79  | 0.08 |
| BSU11780 | <i>cotV</i>   | 3.50  | 2.73  | 0.78  | 0.04 |
| BSU11809 | <i>yjcZ</i>   | 6.20  | 1.78  | 0.29  | 0.01 |
| BSU11810 | <i>spoVIF</i> | 10.49 | 2.66  | 0.25  | 0.00 |
| BSU11839 | <i>yjzE</i>   | 3.50  | 13.20 | 3.78  | 0.00 |
| BSU11840 | <i>yjcF</i>   | 8.13  | 5.49  | 0.68  | 0.05 |
| BSU11850 | <i>yjcG</i>   | 6.58  | 3.80  | 0.58  | 0.00 |
| BSU11860 | <i>yjcH</i>   | 2.72  | 2.31  | 0.85  | 0.03 |
| BSU11910 | <i>yjcM</i>   | 5.36  | 1.00  | 0.19  | 0.00 |
| BSU11920 | <i>yjcN</i>   | 6.37  | 1.64  | 0.26  | 0.00 |
| BSU11950 | <i>yjcQ</i>   | 1.04  | 0.09  | 0.09  | 0.00 |
| BSU11970 | <i>yjcS</i>   | 3.69  | 1.89  | 0.51  | 0.09 |
| BSU11980 | <i>yjdA</i>   | 3.87  | 1.81  | 0.47  | 0.01 |
| BSU12000 | <i>manR</i>   | 0.66  | 12.03 | 18.17 | 0.00 |
| BSU12010 | <i>manP</i>   | 2.69  | 25.89 | 9.64  | 0.00 |
| BSU12020 | <i>manA</i>   | 4.59  | 35.04 | 7.64  | 0.00 |
| BSU12030 | <i>yjdF</i>   | 4.80  | 30.48 | 6.35  | 0.00 |
| BSU12040 | <i>yjdG</i>   | 0.71  | 3.77  | 5.31  | 0.01 |
| BSU12050 | <i>yjdH</i>   | 0.88  | 2.30  | 2.61  | 0.00 |
| BSU12060 | <i>yjdI</i>   | 2.34  | 3.74  | 1.60  | 0.03 |
| BSU12069 | <i>yjzH</i>   | 9.48  | 7.40  | 0.78  | 0.28 |
| BSU12100 | <i>yjeA</i>   | 1.95  | 0.87  | 0.45  | 0.00 |
| BSU12120 | <i>yjfB</i>   | 2.52  | 0.22  | 0.09  | 0.03 |
| BSU12160 | <i>yjgC</i>   | 0.33  | 1.10  | 3.38  | 0.01 |
| BSU12170 | <i>yjgD</i>   | 0.41  | 1.29  | 3.15  | 0.01 |
| BSU12230 | <i>hemD</i>   | 1.20  | 0.71  | 0.59  | 0.00 |
| BSU12270 | <i>yjIB</i>   | 0.79  | 1.48  | 1.87  | 0.00 |
| BSU12280 | <i>rex</i>    | 56.65 | 33.68 | 0.59  | 0.00 |
| BSU12290 | <i>ndh</i>    | 53.78 | 33.80 | 0.63  | 0.01 |
| BSU12300 | <i>uxaC</i>   | 1.10  | 0.36  | 0.32  | 0.00 |
| BSU12410 | <i>yjoA</i>   | 51.43 | 14.35 | 0.28  | 0.00 |
| BSU12420 | <i>yjoB</i>   | 6.36  | 4.00  | 0.63  | 0.01 |
| BSU12430 | <i>rapA</i>   | 1.81  | 16.08 | 8.87  | 0.00 |
| BSU12440 | <i>phrA</i>   | 1.23  | 1.07  | 0.87  | 0.48 |
| BSU12470 | <i>yjqA</i>   | 5.25  | 2.01  | 0.38  | 0.01 |
| BSU12490 | <i>yjqC</i>   | 0.80  | 1.04  | 1.29  | 0.06 |
| BSU12570 | <i>xtmA</i>   | 1.46  | 1.00  | 0.69  | 0.01 |
| BSU12580 | <i>xtmB</i>   | 1.53  | 1.18  | 0.77  | 0.00 |
| BSU12590 | <i>xkdE</i>   | 1.51  | 1.24  | 0.83  | 0.01 |
| BSU12600 | <i>xkdF</i>   | 3.02  | 2.57  | 0.85  | 0.03 |
| BSU12610 | <i>xkdG</i>   | 3.60  | 2.87  | 0.80  | 0.10 |
| BSU12619 | <i>yzkL</i>   | 5.46  | 4.17  | 0.76  | 0.03 |
| BSU12620 | <i>xkdH</i>   | 4.76  | 3.35  | 0.71  | 0.00 |
| BSU12630 | <i>xkdI</i>   | 3.71  | 3.03  | 0.82  | 0.10 |
| BSU12640 | <i>xkdJ</i>   | 3.86  | 2.63  | 0.68  | 0.01 |
| BSU12649 | <i>yzkM</i>   | 5.56  | 3.49  | 0.63  | 0.01 |



|          |                |       |       |      |      |
|----------|----------------|-------|-------|------|------|
| BSU12650 | <i>xkdK</i>    | 4.56  | 2.82  | 0.62 | 0.00 |
| BSU12660 | <i>xkdM</i>    | 5.89  | 2.96  | 0.50 | 0.00 |
| BSU12671 | <i>xkdN</i>    | 2.98  | 1.31  | 0.44 | 0.00 |
| BSU12672 | <i>xkzB</i>    | 2.43  | 1.47  | 0.61 | 0.08 |
| BSU12680 | <i>xkdO</i>    | 1.56  | 1.10  | 0.70 | 0.02 |
| BSU12690 | <i>xkdP</i>    | 1.54  | 1.14  | 0.74 | 0.01 |
| BSU12700 | <i>xkdQ</i>    | 1.39  | 1.23  | 0.88 | 0.17 |
| BSU12710 | <i>xkdR</i>    | 1.89  | 1.31  | 0.69 | 0.00 |
| BSU12720 | <i>xkdS</i>    | 1.30  | 1.26  | 0.97 | 0.51 |
| BSU12730 | <i>xkdT</i>    | 1.29  | 1.23  | 0.95 | 0.54 |
| BSU12740 | <i>xkdU</i>    | 1.45  | 1.27  | 0.88 | 0.06 |
| BSU12749 | <i>xkzA</i>    | 1.34  | 1.51  | 1.13 | 0.37 |
| BSU12750 | <i>xkdV</i>    | 1.24  | 0.92  | 0.74 | 0.11 |
| BSU12760 | <i>xkdW</i>    | 1.96  | 1.55  | 0.79 | 0.08 |
| BSU12770 | <i>xkdX</i>    | 2.13  | 1.45  | 0.68 | 0.00 |
| BSU12780 | <i>xepA</i>    | 1.53  | 1.15  | 0.75 | 0.00 |
| BSU12790 | <i>xhIA</i>    | 2.16  | 1.89  | 0.88 | 0.14 |
| BSU12800 | <i>xhIB</i>    | 2.43  | 1.66  | 0.68 | 0.01 |
| BSU12810 | <i>xlyA</i>    | 2.27  | 1.23  | 0.54 | 0.00 |
| BSU12820 | <i>spolISB</i> | 2.09  | 1.91  | 0.92 | 0.31 |
| BSU12830 | <i>spolISA</i> | 0.97  | 1.20  | 1.24 | 0.00 |
| BSU12840 | <i>pit</i>     | 9.17  | 6.96  | 0.76 | 0.01 |
| BSU12850 | <i>ykaA</i>    | 5.65  | 6.79  | 1.20 | 0.32 |
| BSU12860 | <i>ykbA</i>    | 1.34  | 1.09  | 0.82 | 0.12 |
| BSU13010 | <i>ykgB</i>    | 12.81 | 8.66  | 0.68 | 0.00 |
| BSU13020 | <i>ykgA</i>    | 1.63  | 2.52  | 1.54 | 0.02 |
| BSU13030 | <i>ykhA</i>    | 2.23  | 1.42  | 0.64 | 0.00 |
| BSU13110 | <i>purU</i>    | 2.64  | 3.22  | 1.22 | 0.15 |
| BSU13120 | <i>proB</i>    | 1.29  | 1.33  | 1.03 | 0.71 |
| BSU13130 | <i>proA</i>    | 4.36  | 2.60  | 0.60 | 0.00 |
| BSU13140 | <i>ohrA</i>    | 1.77  | 0.55  | 0.31 | 0.00 |
| BSU13150 | <i>ohrR</i>    | 1.68  | 0.88  | 0.53 | 0.01 |
| BSU13160 | <i>ohrB</i>    | 6.84  | 8.64  | 1.26 | 0.12 |
| BSU13169 | <i>ykzN</i>    | 0.80  | 1.35  | 1.70 | 0.05 |
| BSU13200 | <i>rsbRB</i>   | 14.83 | 8.67  | 0.58 | 0.07 |
| BSU13280 | <i>ykoJ</i>    | 0.61  | 1.15  | 1.90 | 0.01 |
| BSU13300 | <i>mgtE</i>    | 4.02  | 2.32  | 0.58 | 0.00 |
| BSU13340 | <i>ykoM</i>    | 7.16  | 2.63  | 0.37 | 0.00 |
| BSU13430 | <i>ykoX</i>    | 1.13  | 0.91  | 0.80 | 0.13 |
| BSU13480 | <i>ykrK</i>    | 1.59  | 1.43  | 0.89 | 0.57 |
| BSU13490 | <i>ykrL</i>    | 19.53 | 16.45 | 0.84 | 0.09 |
| BSU13540 | <i>ogt</i>     | 1.71  | 0.78  | 0.46 | 0.00 |
| BSU13620 | <i>mtnD</i>    | 1.17  | 1.40  | 1.19 | 0.40 |
| BSU13630 | <i>ykvA</i>    | 2.90  | 2.50  | 0.86 | 0.18 |
| BSU13640 | <i>spoOE</i>   | 1.99  | 1.82  | 0.91 | 0.74 |
| BSU13660 | <i>kinD</i>    | 1.38  | 1.11  | 0.80 | 0.06 |
| BSU13670 | <i>mhqR</i>    | 3.65  | 4.03  | 1.11 | 0.51 |
| BSU13680 | <i>motB</i>    | 6.11  | 0.61  | 0.10 | 0.00 |
| BSU13690 | <i>motA</i>    | 3.99  | 0.32  | 0.08 | 0.00 |
| BSU13700 | <i>clpE</i>    | 2.71  | 1.72  | 0.63 | 0.03 |

|          |             |        |       |      |      |
|----------|-------------|--------|-------|------|------|
| BSU13720 | <i>queC</i> | 0.35   | 1.47  | 4.17 | 0.00 |
| BSU13730 | <i>queD</i> | 0.69   | 2.33  | 3.37 | 0.00 |
| BSU13740 | <i>queE</i> | 1.31   | 3.47  | 2.65 | 0.00 |
| BSU13750 | <i>ykvM</i> | 3.28   | 5.61  | 1.71 | 0.00 |
| BSU13810 | <i>ykvS</i> | 2.50   | 1.66  | 0.66 | 0.09 |
| BSU13819 | <i>ykzS</i> | 2.30   | 1.51  | 0.66 | 0.17 |
| BSU13860 | <i>ykvY</i> | 7.91   | 4.35  | 0.55 | 0.00 |
| BSU13870 | <i>ykvZ</i> | 1.79   | 1.08  | 0.60 | 0.00 |
| BSU13880 | <i>glcT</i> | 9.05   | 2.49  | 0.28 | 0.00 |
| BSU13890 | <i>ptsG</i> | 59.34  | 11.47 | 0.19 | 0.00 |
| BSU13900 | <i>ptsH</i> | 196.04 | 76.40 | 0.39 | 0.00 |
| BSU13910 | <i>ptsI</i> | 165.84 | 78.58 | 0.47 | 0.00 |
| BSU13920 | <i>splA</i> | 1.15   | 1.11  | 0.97 | 0.69 |
| BSU13930 | <i>splB</i> | 1.06   | 0.91  | 0.86 | 0.09 |
| BSU13950 | <i>mcpC</i> | 2.14   | 0.26  | 0.12 | 0.00 |
| BSU13960 | <i>ykwC</i> | 6.98   | 2.05  | 0.29 | 0.00 |
| BSU13980 | <i>pbpH</i> | 1.01   | 0.72  | 0.71 | 0.05 |
| BSU14000 | <i>patA</i> | 3.80   | 2.57  | 0.68 | 0.00 |
| BSU14009 | <i>ykzT</i> | 1.54   | 1.36  | 0.89 | 0.66 |
| BSU14010 | <i>cheV</i> | 1.80   | 0.28  | 0.16 | 0.00 |
| BSU14020 | <i>ykyB</i> | 1.10   | 1.45  | 1.33 | 0.11 |
| BSU14030 | <i>ykuC</i> | 1.45   | 2.06  | 1.42 | 0.00 |
| BSU14071 | <i>fadG</i> | 2.55   | 1.46  | 0.57 | 0.10 |
| BSU14072 | <i>ykzU</i> | 3.82   | 1.30  | 0.34 | 0.01 |
| BSU14080 | <i>ykuH</i> | 0.60   | 1.47  | 2.44 | 0.06 |
| BSU14090 | <i>ykuI</i> | 1.98   | 1.56  | 0.79 | 0.10 |
| BSU14100 | <i>ykuJ</i> | 22.56  | 15.06 | 0.67 | 0.09 |
| BSU14110 | <i>ykuK</i> | 14.40  | 14.68 | 1.02 | 0.79 |
| BSU14120 | <i>ykzF</i> | 5.30   | 14.38 | 2.71 | 0.00 |
| BSU14130 | <i>ykuL</i> | 1.88   | 7.00  | 3.72 | 0.00 |
| BSU14140 | <i>ccpC</i> | 2.12   | 4.08  | 1.92 | 0.02 |
| BSU14150 | <i>ykuN</i> | 8.11   | 3.97  | 0.49 | 0.10 |
| BSU14160 | <i>ykuO</i> | 9.51   | 5.91  | 0.62 | 0.07 |
| BSU14170 | <i>ykuP</i> | 12.20  | 6.67  | 0.55 | 0.02 |
| BSU14180 | <i>dapH</i> | 22.65  | 16.31 | 0.72 | 0.04 |
| BSU14190 | <i>dapL</i> | 3.58   | 3.32  | 0.93 | 0.19 |
| BSU14200 | <i>ykuS</i> | 5.26   | 3.76  | 0.71 | 0.05 |
| BSU14210 | <i>ykuT</i> | 1.11   | 2.27  | 2.05 | 0.00 |
| BSU14240 | <i>rok</i>  | 7.66   | 3.71  | 0.48 | 0.03 |
| BSU14260 | <i>mobA</i> | 1.14   | 1.97  | 1.74 | 0.00 |
| BSU14270 | <i>moeB</i> | 1.48   | 2.36  | 1.59 | 0.01 |
| BSU14280 | <i>moeA</i> | 2.87   | 3.28  | 1.14 | 0.36 |
| BSU14290 | <i>mobB</i> | 4.51   | 4.05  | 0.90 | 0.29 |
| BSU14300 | <i>moaE</i> | 5.42   | 4.77  | 0.88 | 0.35 |
| BSU14310 | <i>moaD</i> | 4.04   | 3.62  | 0.90 | 0.46 |
| BSU14340 | <i>yknW</i> | 7.71   | 5.68  | 0.74 | 0.02 |
| BSU14350 | <i>yknX</i> | 6.94   | 6.24  | 0.90 | 0.27 |
| BSU14360 | <i>yknY</i> | 7.54   | 6.79  | 0.90 | 0.51 |
| BSU14370 | <i>yknZ</i> | 8.57   | 6.70  | 0.78 | 0.12 |
| BSU14380 | <i>fruR</i> | 1.65   | 5.69  | 3.44 | 0.00 |

|          |              |        |        |       |      |
|----------|--------------|--------|--------|-------|------|
| BSU14390 | <i>fruK</i>  | 2.06   | 5.66   | 2.74  | 0.00 |
| BSU14400 | <i>fruA</i>  | 2.96   | 7.71   | 2.60  | 0.00 |
| BSU14410 | <i>sipT</i>  | 3.27   | 2.40   | 0.73  | 0.03 |
| BSU14420 | <i>ykoA</i>  | 4.04   | 2.61   | 0.64  | 0.10 |
| BSU14430 | <i>ykpA</i>  | 9.72   | 9.21   | 0.95  | 0.31 |
| BSU14440 | <i>ykpB</i>  | 3.26   | 2.44   | 0.75  | 0.03 |
| BSU14450 | <i>ampS</i>  | 2.69   | 1.71   | 0.64  | 0.00 |
| BSU14460 | <i>ykpC</i>  | 3.04   | 0.47   | 0.15  | 0.00 |
| BSU14470 | <i>mreBH</i> | 2.13   | 0.44   | 0.21  | 0.00 |
| BSU14480 | <i>abh</i>   | 53.75  | 9.84   | 0.18  | 0.00 |
| BSU14490 | <i>kinC</i>  | 2.93   | 1.66   | 0.57  | 0.01 |
| BSU14500 | <i>ykqA</i>  | 3.92   | 2.20   | 0.56  | 0.00 |
| BSU14510 | <i>ktrC</i>  | 5.01   | 3.15   | 0.63  | 0.00 |
| BSU14520 | <i>adeC</i>  | 1.30   | 1.44   | 1.11  | 0.02 |
| BSU14530 | <i>rnjA</i>  | 13.95  | 15.91  | 1.14  | 0.06 |
| BSU14540 | <i>yzkG</i>  | 9.15   | 8.27   | 0.90  | 0.67 |
| BSU14550 | <i>ykrA</i>  | 4.00   | 1.18   | 0.30  | 0.01 |
| BSU14560 | <i>def</i>   | 2.43   | 2.38   | 0.98  | 0.58 |
| BSU14569 | <i>yzkV</i>  | 0.60   | 2.22   | 3.71  | 0.02 |
| BSU14580 | <i>pdhA</i>  | 57.75  | 108.13 | 1.87  | 0.00 |
| BSU14590 | <i>pdhB</i>  | 103.44 | 116.68 | 1.13  | 0.27 |
| BSU14600 | <i>pdhC</i>  | 134.78 | 121.74 | 0.90  | 0.40 |
| BSU14610 | <i>pdhD</i>  | 184.42 | 130.05 | 0.71  | 0.06 |
| BSU14640 | <i>yktA</i>  | 2.17   | 1.63   | 0.75  | 0.04 |
| BSU14650 | <i>yktB</i>  | 3.74   | 2.28   | 0.61  | 0.01 |
| BSU14660 | <i>yzkI</i>  | 1.15   | 1.38   | 1.20  | 0.41 |
| BSU14670 | <i>suhB</i>  | 1.58   | 1.53   | 0.97  | 0.72 |
| BSU14680 | <i>yzkC</i>  | 2.53   | 2.21   | 0.88  | 0.13 |
| BSU14760 | <i>ylaF</i>  | 3.50   | 2.03   | 0.58  | 0.10 |
| BSU14770 | <i>bipA</i>  | 8.64   | 16.13  | 1.87  | 0.00 |
| BSU14780 | <i>ylaH</i>  | 16.95  | 17.95  | 1.06  | 0.57 |
| BSU14790 | <i>ylal</i>  | 2.01   | 1.42   | 0.70  | 0.21 |
| BSU14810 | <i>ylaK</i>  | 1.76   | 0.55   | 0.31  | 0.00 |
| BSU14820 | <i>ylaL</i>  | 14.49  | 3.99   | 0.28  | 0.00 |
| BSU14840 | <i>ylaN</i>  | 11.41  | 8.07   | 0.71  | 0.06 |
| BSU14850 | <i>ftsW</i>  | 1.69   | 2.18   | 1.29  | 0.16 |
| BSU14860 | <i>pycA</i>  | 11.56  | 7.05   | 0.61  | 0.00 |
| BSU14870 | <i>ctaA</i>  | 16.59  | 6.19   | 0.37  | 0.00 |
| BSU14880 | <i>ctaB</i>  | 13.41  | 16.94  | 1.26  | 0.02 |
| BSU14920 | <i>ctaF</i>  | 1.11   | 0.67   | 0.60  | 0.01 |
| BSU14940 | <i>ylbA</i>  | 4.67   | 0.83   | 0.18  | 0.00 |
| BSU14950 | <i>ylbB</i>  | 0.22   | 4.34   | 19.81 | 0.00 |
| BSU14990 | <i>ylbF</i>  | 4.71   | 6.89   | 1.46  | 0.04 |
| BSU15000 | <i>ylbG</i>  | 4.10   | 3.73   | 0.91  | 0.39 |
| BSU15010 | <i>ylbH</i>  | 2.80   | 3.64   | 1.30  | 0.04 |
| BSU15020 | <i>coaD</i>  | 3.74   | 3.81   | 1.02  | 0.84 |
| BSU15040 | <i>ylbK</i>  | 1.01   | 1.98   | 1.97  | 0.00 |
| BSU15050 | <i>ylbL</i>  | 1.42   | 1.69   | 1.19  | 0.19 |
| BSU15069 | <i>ylzH</i>  | 2.42   | 2.07   | 0.86  | 0.52 |
| BSU15070 | <i>ylbN</i>  | 48.58  | 97.88  | 2.01  | 0.03 |

|          |               |        |        |      |      |
|----------|---------------|--------|--------|------|------|
| BSU15080 | <i>rpmF</i>   | 148.50 | 125.83 | 0.85 | 0.40 |
| BSU15100 | <i>ylbP</i>   | 1.28   | 0.71   | 0.56 | 0.01 |
| BSU15110 | <i>ylbQ</i>   | 0.46   | 1.10   | 2.36 | 0.00 |
| BSU15120 | <i>yllA</i>   | 2.93   | 2.63   | 0.90 | 0.32 |
| BSU15130 | <i>yllB</i>   | 15.82  | 59.71  | 3.78 | 0.00 |
| BSU15140 | <i>mraW</i>   | 12.60  | 11.94  | 0.95 | 0.37 |
| BSU15150 | <i>ftsL</i>   | 22.94  | 14.61  | 0.64 | 0.00 |
| BSU15160 | <i>pbpB</i>   | 4.23   | 4.58   | 1.08 | 0.44 |
| BSU15180 | <i>murE</i>   | 1.89   | 2.82   | 1.49 | 0.02 |
| BSU15190 | <i>mraY</i>   | 4.26   | 4.85   | 1.14 | 0.05 |
| BSU15200 | <i>murD</i>   | 6.71   | 7.62   | 1.14 | 0.20 |
| BSU15210 | <i>spoVE</i>  | 5.00   | 6.08   | 1.22 | 0.15 |
| BSU15220 | <i>murG</i>   | 4.13   | 4.63   | 1.12 | 0.27 |
| BSU15230 | <i>murB</i>   | 6.51   | 5.52   | 0.85 | 0.01 |
| BSU15240 | <i>divIB</i>  | 2.22   | 2.76   | 1.24 | 0.03 |
| BSU15250 | <i>ylxW</i>   | 2.66   | 2.97   | 1.12 | 0.03 |
| BSU15260 | <i>ylxX</i>   | 3.74   | 3.45   | 0.92 | 0.31 |
| BSU15270 | <i>sbp</i>    | 3.32   | 3.26   | 0.98 | 0.88 |
| BSU15280 | <i>ftsA</i>   | 7.84   | 8.02   | 1.02 | 0.83 |
| BSU15290 | <i>ftsZ</i>   | 22.51  | 14.24  | 0.63 | 0.01 |
| BSU15370 | <i>ylmD</i>   | 3.86   | 6.47   | 1.68 | 0.00 |
| BSU15380 | <i>ylmE</i>   | 6.44   | 7.53   | 1.17 | 0.10 |
| BSU15390 | <i>sepF</i>   | 12.37  | 13.13  | 1.06 | 0.36 |
| BSU15400 | <i>ylmG</i>   | 14.08  | 10.81  | 0.77 | 0.06 |
| BSU15410 | <i>ylmH</i>   | 4.17   | 3.96   | 0.95 | 0.29 |
| BSU15420 | <i>divIVA</i> | 13.86  | 7.43   | 0.54 | 0.00 |
| BSU15430 | <i>ileS</i>   | 7.34   | 7.64   | 1.04 | 0.61 |
| BSU15450 | <i>lspA</i>   | 1.11   | 1.70   | 1.54 | 0.06 |
| BSU15460 | <i>rluD</i>   | 2.99   | 2.90   | 0.97 | 0.68 |
| BSU15470 | <i>pyrR</i>   | 4.95   | 3.68   | 0.74 | 0.07 |
| BSU15480 | <i>pyrP</i>   | 9.93   | 2.62   | 0.26 | 0.00 |
| BSU15490 | <i>pyrB</i>   | 6.41   | 1.24   | 0.19 | 0.00 |
| BSU15500 | <i>pyrC</i>   | 10.06  | 1.31   | 0.13 | 0.00 |
| BSU15510 | <i>pyrAA</i>  | 16.77  | 1.54   | 0.09 | 0.01 |
| BSU15520 | <i>carB</i>   | 21.35  | 1.38   | 0.06 | 0.02 |
| BSU15530 | <i>pyrK</i>   | 22.26  | 1.50   | 0.07 | 0.03 |
| BSU15540 | <i>pyrD</i>   | 21.92  | 1.47   | 0.07 | 0.03 |
| BSU15550 | <i>pyrF</i>   | 20.54  | 1.33   | 0.06 | 0.04 |
| BSU15560 | <i>pyrE</i>   | 22.38  | 1.30   | 0.06 | 0.04 |
| BSU15570 | <i>cysH</i>   | 1.58   | 0.71   | 0.45 | 0.02 |
| BSU15630 | <i>sirC</i>   | 1.45   | 0.92   | 0.63 | 0.01 |
| BSU15640 | <i>yloA</i>   | 1.49   | 1.51   | 1.01 | 0.93 |
| BSU15660 | <i>yloC</i>   | 4.84   | 11.78  | 2.43 | 0.00 |
| BSU15670 | <i>ylzA</i>   | 9.95   | 16.47  | 1.66 | 0.00 |
| BSU15680 | <i>gmk</i>    | 10.78  | 11.38  | 1.06 | 0.50 |
| BSU15690 | <i>rpoZ</i>   | 14.47  | 10.96  | 0.76 | 0.10 |
| BSU15700 | <i>coaBC</i>  | 1.34   | 2.66   | 1.99 | 0.00 |
| BSU15710 | <i>priA</i>   | 1.22   | 2.67   | 2.20 | 0.00 |
| BSU15720 | <i>def</i>    | 1.22   | 2.46   | 2.02 | 0.01 |
| BSU15730 | <i>fmt</i>    | 2.47   | 4.35   | 1.76 | 0.01 |

|          |              |        |        |      |      |
|----------|--------------|--------|--------|------|------|
| BSU15740 | <i>rsmB</i>  | 3.92   | 6.03   | 1.54 | 0.00 |
| BSU15750 | <i>yloN</i>  | 4.83   | 6.88   | 1.42 | 0.00 |
| BSU15760 | <i>prpC</i>  | 5.38   | 8.24   | 1.53 | 0.01 |
| BSU15770 | <i>prkC</i>  | 5.30   | 7.50   | 1.41 | 0.01 |
| BSU15780 | <i>yloQ</i>  | 7.11   | 7.88   | 1.11 | 0.01 |
| BSU15790 | <i>rpe</i>   | 9.18   | 8.68   | 0.95 | 0.59 |
| BSU15800 | <i>thiN</i>  | 2.09   | 2.53   | 1.21 | 0.15 |
| BSU15810 | <i>spoVM</i> | 3.09   | 3.52   | 1.14 | 0.57 |
| BSU15820 | <i>rpmB</i>  | 384.59 | 230.92 | 0.60 | 0.05 |
| BSU15830 | <i>yloU</i>  | 5.52   | 5.53   | 1.00 | 0.99 |
| BSU15840 | <i>yloV</i>  | 7.12   | 6.17   | 0.87 | 0.12 |
| BSU15850 | <i>sdaAB</i> | 1.63   | 2.22   | 1.36 | 0.02 |
| BSU15860 | <i>sdaAA</i> | 2.58   | 2.89   | 1.12 | 0.30 |
| BSU15870 | <i>recG</i>  | 1.30   | 2.32   | 1.78 | 0.00 |
| BSU15880 | <i>ylpC</i>  | 5.99   | 7.72   | 1.29 | 0.03 |
| BSU15890 | <i>plsX</i>  | 7.43   | 9.86   | 1.33 | 0.01 |
| BSU15900 | <i>fabD</i>  | 10.90  | 18.55  | 1.70 | 0.00 |
| BSU15910 | <i>fabG</i>  | 16.42  | 26.97  | 1.64 | 0.00 |
| BSU15920 | <i>acpP</i>  | 364.40 | 204.78 | 0.56 | 0.10 |
| BSU15930 | <i>rnc</i>   | 9.92   | 22.42  | 2.26 | 0.01 |
| BSU15940 | <i>smc</i>   | 2.68   | 3.62   | 1.35 | 0.03 |
| BSU15950 | <i>ftsY</i>  | 6.08   | 5.55   | 0.91 | 0.17 |
| BSU15970 | <i>ylxM</i>  | 16.13  | 42.55  | 2.64 | 0.00 |
| BSU15980 | <i>ffh</i>   | 16.17  | 39.83  | 2.46 | 0.00 |
| BSU15990 | <i>rpsP</i>  | 139.42 | 141.73 | 1.02 | 0.88 |
| BSU16000 | <i>ylqC</i>  | 107.85 | 112.28 | 1.04 | 0.74 |
| BSU16010 | <i>ylqD</i>  | 1.77   | 9.11   | 5.15 | 0.00 |
| BSU16020 | <i>rimM</i>  | 2.46   | 9.51   | 3.87 | 0.00 |
| BSU16030 | <i>trmD</i>  | 2.53   | 9.40   | 3.71 | 0.00 |
| BSU16040 | <i>rplS</i>  | 667.03 | 733.15 | 1.10 | 0.60 |
| BSU16050 | <i>rbgA</i>  | 3.25   | 4.45   | 1.37 | 0.00 |
| BSU16060 | <i>rnhB</i>  | 0.63   | 1.65   | 2.62 | 0.00 |
| BSU16070 | <i>ylqG</i>  | 0.75   | 1.54   | 2.05 | 0.00 |
| BSU16080 | <i>ylqH</i>  | 0.63   | 1.27   | 2.02 | 0.01 |
| BSU16090 | <i>sucC</i>  | 34.60  | 15.88  | 0.46 | 0.00 |
| BSU16100 | <i>sucD</i>  | 34.79  | 14.08  | 0.40 | 0.00 |
| BSU16110 | <i>dprA</i>  | 0.18   | 1.47   | 8.06 | 0.00 |
| BSU16120 | <i>topA</i>  | 3.93   | 4.17   | 1.06 | 0.50 |
| BSU16130 | <i>gid</i>   | 3.39   | 4.28   | 1.26 | 0.01 |
| BSU16140 | <i>xerC</i>  | 6.46   | 13.52  | 2.09 | 0.00 |
| BSU16150 | <i>clpQ</i>  | 8.48   | 19.32  | 2.28 | 0.00 |
| BSU16160 | <i>hslU</i>  | 12.72  | 16.88  | 1.33 | 0.00 |
| BSU16170 | <i>codY</i>  | 25.36  | 21.56  | 0.85 | 0.09 |
| BSU16180 | <i>flgB</i>  | 2.07   | 1.39   | 0.67 | 0.04 |
| BSU16190 | <i>flgC</i>  | 2.61   | 2.10   | 0.80 | 0.02 |
| BSU16200 | <i>fliE</i>  | 3.39   | 1.61   | 0.47 | 0.00 |
| BSU16210 | <i>fliF</i>  | 3.51   | 1.58   | 0.45 | 0.00 |
| BSU16220 | <i>fliG</i>  | 4.75   | 1.98   | 0.42 | 0.00 |
| BSU16230 | <i>fliH</i>  | 5.52   | 2.24   | 0.40 | 0.00 |
| BSU16240 | <i>fliI</i>  | 4.26   | 1.85   | 0.43 | 0.00 |

|          |             |        |        |      |      |
|----------|-------------|--------|--------|------|------|
| BSU16250 | <i>fliJ</i> | 4.43   | 1.23   | 0.28 | 0.00 |
| BSU16260 | <i>ylxF</i> | 4.44   | 1.35   | 0.31 | 0.00 |
| BSU16270 | <i>fliK</i> | 4.74   | 1.25   | 0.26 | 0.00 |
| BSU16280 | <i>flgD</i> | 5.65   | 1.39   | 0.25 | 0.00 |
| BSU16290 | <i>flgG</i> | 6.94   | 1.64   | 0.24 | 0.00 |
| BSU16299 | <i>ylzI</i> | 6.15   | 1.57   | 0.26 | 0.00 |
| BSU16300 | <i>fliL</i> | 5.83   | 1.41   | 0.24 | 0.00 |
| BSU16310 | <i>fliM</i> | 6.81   | 1.61   | 0.24 | 0.00 |
| BSU16320 | <i>fliY</i> | 7.55   | 1.78   | 0.24 | 0.00 |
| BSU16330 | <i>cheY</i> | 11.73  | 2.13   | 0.18 | 0.00 |
| BSU16340 | <i>fliZ</i> | 7.02   | 1.61   | 0.23 | 0.00 |
| BSU16350 | <i>fliP</i> | 4.15   | 1.33   | 0.32 | 0.00 |
| BSU16360 | <i>fliQ</i> | 4.53   | 1.37   | 0.30 | 0.00 |
| BSU16370 | <i>fliR</i> | 3.71   | 1.07   | 0.29 | 0.00 |
| BSU16380 | <i>flhB</i> | 3.80   | 1.05   | 0.28 | 0.00 |
| BSU16390 | <i>flhA</i> | 3.44   | 1.05   | 0.30 | 0.00 |
| BSU16400 | <i>flhF</i> | 3.27   | 0.84   | 0.26 | 0.00 |
| BSU16410 | <i>ylxH</i> | 3.09   | 0.93   | 0.30 | 0.00 |
| BSU16420 | <i>cheB</i> | 3.16   | 0.86   | 0.27 | 0.00 |
| BSU16430 | <i>cheA</i> | 4.33   | 1.16   | 0.27 | 0.00 |
| BSU16440 | <i>cheW</i> | 5.25   | 1.39   | 0.27 | 0.00 |
| BSU16450 | <i>cheC</i> | 4.56   | 1.13   | 0.25 | 0.00 |
| BSU16460 | <i>cheD</i> | 4.39   | 1.18   | 0.27 | 0.00 |
| BSU16470 | <i>sigD</i> | 4.69   | 1.28   | 0.27 | 0.00 |
| BSU16480 | <i>ylxL</i> | 5.19   | 1.37   | 0.27 | 0.00 |
| BSU16490 | <i>rpsB</i> | 131.22 | 225.17 | 1.72 | 0.01 |
| BSU16500 | <i>tsf</i>  | 75.60  | 87.91  | 1.16 | 0.05 |
| BSU16510 | <i>pyrH</i> | 15.75  | 18.06  | 1.15 | 0.09 |
| BSU16520 | <i>frr</i>  | 19.53  | 15.19  | 0.78 | 0.00 |
| BSU16530 | <i>uppS</i> | 3.07   | 6.92   | 2.25 | 0.00 |
| BSU16540 | <i>cdsA</i> | 3.78   | 7.38   | 1.95 | 0.02 |
| BSU16550 | <i>dxr</i>  | 6.13   | 10.43  | 1.70 | 0.00 |
| BSU16560 | <i>rseP</i> | 10.26  | 13.44  | 1.31 | 0.00 |
| BSU16570 | <i>proS</i> | 15.82  | 16.74  | 1.06 | 0.38 |
| BSU16580 | <i>polC</i> | 2.29   | 4.10   | 1.79 | 0.00 |
| BSU16590 | <i>ylxS</i> | 5.43   | 13.73  | 2.53 | 0.00 |
| BSU16600 | <i>nusA</i> | 8.42   | 13.69  | 1.63 | 0.00 |
| BSU16610 | <i>ylxR</i> | 11.29  | 18.25  | 1.62 | 0.01 |
| BSU16620 | <i>ylxQ</i> | 11.06  | 19.47  | 1.76 | 0.00 |
| BSU16630 | <i>infB</i> | 17.58  | 22.00  | 1.25 | 0.06 |
| BSU16640 | <i>ylxP</i> | 34.88  | 35.74  | 1.02 | 0.68 |
| BSU16650 | <i>rbfA</i> | 25.95  | 26.52  | 1.02 | 0.83 |
| BSU16660 | <i>truB</i> | 2.05   | 3.61   | 1.76 | 0.00 |
| BSU16670 | <i>ribC</i> | 4.58   | 4.40   | 0.96 | 0.50 |
| BSU16680 | <i>rpsO</i> | 558.32 | 368.51 | 0.66 | 0.05 |
| BSU16690 | <i>pnpA</i> | 22.90  | 3.16   | 0.14 | 0.00 |
| BSU16700 | <i>ylxY</i> | 1.72   | 0.06   | 0.03 | 0.00 |
| BSU16710 | <i>mlpA</i> | 2.21   | 0.13   | 0.06 | 0.00 |
| BSU16750 | <i>asd</i>  | 11.76  | 5.72   | 0.49 | 0.00 |
| BSU16760 | <i>dapG</i> | 7.42   | 5.59   | 0.75 | 0.05 |

|          |                |       |       |      |      |
|----------|----------------|-------|-------|------|------|
| BSU16770 | <i>dapA</i>    | 18.56 | 12.49 | 0.67 | 0.00 |
| BSU16780 | <i>rnjB</i>    | 11.76 | 14.79 | 1.26 | 0.00 |
| BSU16800 | <i>spolIIE</i> | 1.04  | 2.08  | 2.00 | 0.00 |
| BSU16810 | <i>ymfC</i>    | 2.31  | 5.44  | 2.35 | 0.00 |
| BSU16845 | <i>ymfF</i>    | 5.68  | 8.11  | 1.43 | 0.00 |
| BSU16860 | <i>ymfH</i>    | 11.96 | 11.52 | 0.96 | 0.27 |
| BSU16870 | <i>fabG</i>    | 2.29  | 2.74  | 1.20 | 0.09 |
| BSU16880 | <i>ymfJ</i>    | 3.50  | 3.76  | 1.07 | 0.44 |
| BSU16910 | <i>ymfM</i>    | 4.92  | 3.84  | 0.78 | 0.19 |
| BSU16920 | <i>pgsA</i>    | 3.06  | 3.43  | 1.12 | 0.17 |
| BSU16930 | <i>cinA</i>    | 5.01  | 4.88  | 0.97 | 0.69 |
| BSU16940 | <i>recA</i>    | 15.12 | 14.36 | 0.95 | 0.64 |
| BSU16950 | <i>pbpX</i>    | 2.88  | 1.63  | 0.57 | 0.01 |
| BSU16960 | <i>ymdA</i>    | 33.33 | 32.16 | 0.96 | 0.74 |
| BSU16970 | <i>ymdB</i>    | 1.90  | 3.50  | 1.84 | 0.02 |
| BSU16980 | <i>spoVS</i>   | 9.04  | 6.08  | 0.67 | 0.03 |
| BSU16990 | <i>tdh</i>     | 1.64  | 1.05  | 0.64 | 0.00 |
| BSU17000 | <i>kbl</i>     | 1.79  | 0.52  | 0.29 | 0.00 |
| BSU17010 | <i>ymcB</i>    | 6.18  | 5.84  | 0.95 | 0.52 |
| BSU17020 | <i>ymcA</i>    | 14.79 | 7.51  | 0.51 | 0.01 |
| BSU17040 | <i>mutS</i>    | 0.87  | 1.18  | 1.36 | 0.00 |
| BSU17050 | <i>mutL</i>    | 1.97  | 2.30  | 1.17 | 0.15 |
| BSU17230 | <i>pksS</i>    | 1.43  | 0.53  | 0.37 | 0.00 |
| BSU17280 | <i>ymaD</i>    | 3.98  | 1.54  | 0.39 | 0.00 |
| BSU17340 | <i>hfq</i>     | 15.69 | 1.83  | 0.12 | 0.00 |
| BSU17360 | <i>ymzA</i>    | 1.45  | 0.77  | 0.53 | 0.01 |
| BSU17370 | <i>nrdI</i>    | 1.09  | 2.67  | 2.44 | 0.00 |
| BSU17380 | <i>nrdE</i>    | 2.98  | 3.99  | 1.34 | 0.00 |
| BSU17390 | <i>nrdF</i>    | 7.39  | 6.38  | 0.86 | 0.09 |
| BSU17400 | <i>ymaB</i>    | 2.05  | 2.60  | 1.27 | 0.13 |
| BSU17430 | <i>ynbA</i>    | 0.61  | 2.10  | 3.47 | 0.00 |
| BSU17440 | <i>ynbB</i>    | 1.18  | 3.06  | 2.59 | 0.00 |
| BSU17450 | <i>glnR</i>    | 8.81  | 24.43 | 2.77 | 0.00 |
| BSU17460 | <i>glnA</i>    | 35.75 | 39.16 | 1.10 | 0.48 |
| BSU17500 | <i>ynaB</i>    | 1.87  | 0.78  | 0.41 | 0.03 |
| BSU17510 | <i>ynaC</i>    | 1.34  | 0.50  | 0.37 | 0.03 |
| BSU17590 | <i>xylR</i>    | 1.08  | 0.55  | 0.51 | 0.03 |
| BSU17600 | <i>xylA</i>    | 8.28  | 0.46  | 0.06 | 0.00 |
| BSU17610 | <i>xylB</i>    | 4.22  | 0.33  | 0.08 | 0.00 |
| BSU17670 | <i>cotU</i>    | 2.01  | 0.53  | 0.26 | 0.06 |
| BSU17690 | <i>yncM</i>    | 2.58  | 0.52  | 0.20 | 0.00 |
| BSU17700 | <i>cotC</i>    | 4.02  | 0.17  | 0.04 | 0.02 |
| BSU17710 | <i>tatAC</i>   | 1.12  | 0.28  | 0.25 | 0.00 |
| BSU17730 | <i>yndB</i>    | 5.05  | 2.31  | 0.46 | 0.00 |
| BSU17840 | <i>yndN</i>    | 4.16  | 1.87  | 0.45 | 0.09 |
| BSU17850 | <i>lexA</i>    | 5.02  | 4.89  | 0.97 | 0.78 |
| BSU17880 | <i>ynzC</i>    | 1.23  | 1.54  | 1.25 | 0.42 |
| BSU17890 | <i>tkl</i>     | 46.19 | 33.19 | 0.72 | 0.00 |
| BSU17910 | <i>yneF</i>    | 32.19 | 19.80 | 0.62 | 0.15 |
| BSU17950 | <i>yneJ</i>    | 5.79  | 3.54  | 0.61 | 0.14 |

|          |             |       |       |      |      |
|----------|-------------|-------|-------|------|------|
| BSU17960 | <i>yneK</i> | 1.25  | 1.44  | 1.15 | 0.26 |
| BSU18000 | <i>citB</i> | 6.80  | 3.93  | 0.58 | 0.04 |
| BSU18010 | <i>yneN</i> | 1.26  | 1.04  | 0.83 | 0.26 |
| BSU18060 | <i>yneR</i> | 5.34  | 3.73  | 0.70 | 0.00 |
| BSU18070 | <i>yneS</i> | 2.49  | 3.17  | 1.27 | 0.07 |
| BSU18080 | <i>yneT</i> | 3.06  | 1.64  | 0.53 | 0.03 |
| BSU18090 | <i>parE</i> | 1.87  | 1.71  | 0.91 | 0.14 |
| BSU18100 | <i>parC</i> | 5.83  | 4.23  | 0.73 | 0.00 |
| BSU18110 | <i>ynfC</i> | 7.48  | 11.19 | 1.50 | 0.04 |
| BSU18120 | <i>alsT</i> | 3.09  | 8.82  | 2.85 | 0.00 |
| BSU18190 | <i>yngC</i> | 1.49  | 1.57  | 1.05 | 0.65 |
| BSU18350 | <i>dacC</i> | 1.04  | 0.21  | 0.20 | 0.00 |
| BSU18370 | <i>yoeA</i> | 1.38  | 0.52  | 0.38 | 0.00 |
| BSU18380 | <i>iseA</i> | 59.07 | 18.89 | 0.32 | 0.00 |
| BSU18500 | <i>fabG</i> | 31.70 | 16.37 | 0.52 | 0.00 |
| BSU18510 | <i>yoxC</i> | 0.84  | 1.39  | 1.66 | 0.04 |
| BSU18580 | <i>yoaF</i> | 6.36  | 4.94  | 0.78 | 0.27 |
| BSU18590 | <i>yoaG</i> | 5.27  | 2.88  | 0.55 | 0.07 |
| BSU18630 | <i>exlX</i> | 1.43  | 1.01  | 0.70 | 0.00 |
| BSU18660 | <i>yoaM</i> | 1.37  | 0.51  | 0.37 | 0.00 |
| BSU18669 | <i>yoZS</i> | 1.50  | 1.27  | 0.84 | 0.35 |
| BSU18800 | <i>penP</i> | 1.23  | 1.00  | 0.81 | 0.00 |
| BSU18840 | <i>xynA</i> | 15.35 | 4.69  | 0.31 | 0.00 |
| BSU18849 | <i>yoZV</i> | 2.25  | 0.65  | 0.29 | 0.01 |
| BSU18910 | <i>rapK</i> | 3.82  | 0.21  | 0.05 | 0.00 |
| BSU18920 | <i>phrK</i> | 22.38 | 0.97  | 0.04 | 0.00 |
| BSU18970 | <i>yobI</i> | 1.20  | 0.67  | 0.55 | 0.16 |
| BSU18980 | <i>yobJ</i> | 8.16  | 3.43  | 0.42 | 0.13 |
| BSU19130 | <i>yocA</i> | 4.27  | 8.65  | 2.03 | 0.02 |
| BSU19140 | <i>yoZB</i> | 6.55  | 3.33  | 0.51 | 0.05 |
| BSU19210 | <i>yocH</i> | 17.14 | 31.25 | 1.82 | 0.01 |
| BSU19230 | <i>yocI</i> | 12.96 | 4.93  | 0.38 | 0.00 |
| BSU19240 | <i>yocK</i> | 1.71  | 3.56  | 2.08 | 0.00 |
| BSU19250 | <i>yocL</i> | 0.72  | 1.48  | 2.06 | 0.00 |
| BSU19259 | <i>yoyB</i> | 0.68  | 1.60  | 2.36 | 0.00 |
| BSU19260 | <i>yocM</i> | 0.63  | 1.33  | 2.12 | 0.00 |
| BSU19270 | <i>yoZN</i> | 0.82  | 1.46  | 1.79 | 0.07 |
| BSU19280 | <i>yocN</i> | 0.74  | 1.46  | 1.97 | 0.01 |
| BSU19290 | <i>yoZO</i> | 9.87  | 3.74  | 0.38 | 0.01 |
| BSU19300 | <i>yoZC</i> | 5.35  | 2.01  | 0.38 | 0.00 |
| BSU19310 | <i>dhaS</i> | 1.35  | 2.04  | 1.51 | 0.01 |
| BSU19340 | <i>yocR</i> | 0.60  | 1.28  | 2.15 | 0.00 |
| BSU19360 | <i>odhB</i> | 83.15 | 30.26 | 0.36 | 0.00 |
| BSU19370 | <i>sucA</i> | 63.83 | 30.10 | 0.47 | 0.00 |
| BSU19380 | <i>yojO</i> | 2.84  | 2.31  | 0.81 | 0.05 |
| BSU19390 | <i>yojN</i> | 1.72  | 1.61  | 0.93 | 0.40 |
| BSU19460 | <i>yojG</i> | 5.43  | 8.96  | 1.65 | 0.00 |
| BSU19470 | <i>yojF</i> | 4.72  | 11.20 | 2.37 | 0.00 |
| BSU19479 | <i>yoyC</i> | 3.62  | 10.68 | 2.95 | 0.00 |
| BSU19480 | <i>yojE</i> | 1.77  | 4.67  | 2.64 | 0.00 |



|          |             |       |      |      |      |
|----------|-------------|-------|------|------|------|
| BSU19540 | <i>yodB</i> | 1.00  | 0.61 | 0.61 | 0.00 |
| BSU19550 | <i>yodC</i> | 10.27 | 6.29 | 0.61 | 0.00 |
| BSU19590 | <i>ctpA</i> | 2.36  | 3.18 | 1.35 | 0.00 |
| BSU19610 | <i>yodI</i> | 1.22  | 0.42 | 0.34 | 0.05 |
| BSU19620 | <i>yodJ</i> | 6.16  | 4.27 | 0.69 | 0.00 |
| BSU19630 | <i>deoD</i> | 17.69 | 8.81 | 0.50 | 0.00 |
| BSU19650 | <i>yodM</i> | 0.31  | 1.16 | 3.73 | 0.00 |
| BSU19770 | <i>cgeC</i> | 1.74  | 0.34 | 0.20 | 0.02 |
| BSU19780 | <i>cgeA</i> | 4.55  | 1.74 | 0.38 | 0.00 |
| BSU19790 | <i>cgeB</i> | 3.00  | 1.28 | 0.43 | 0.00 |
| BSU19840 | <i>yotL</i> | 0.14  | 1.31 | 9.51 | 0.02 |
| BSU20190 | <i>yosA</i> | 7.81  | 0.90 | 0.12 | 0.06 |
| BSU20420 | <i>yorD</i> | 10.57 | 2.95 | 0.28 | 0.00 |
| BSU20440 | <i>yorB</i> | 2.24  | 0.92 | 0.41 | 0.01 |
| BSU20760 | <i>yopU</i> | 1.08  | 0.30 | 0.28 | 0.01 |
| BSU20770 | <i>yopT</i> | 1.29  | 0.39 | 0.30 | 0.01 |
| BSU20780 | <i>yopS</i> | 4.61  | 3.29 | 0.71 | 0.15 |
| BSU20790 | <i>yopR</i> | 2.80  | 1.59 | 0.57 | 0.08 |
| BSU20800 | <i>yopQ</i> | 1.56  | 1.18 | 0.75 | 0.35 |
| BSU20820 | <i>yopO</i> | 0.84  | 1.09 | 1.29 | 0.22 |
| BSU20850 | <i>yopL</i> | 20.69 | 6.47 | 0.31 | 0.13 |
| BSU20860 | <i>yopK</i> | 1.69  | 1.12 | 0.67 | 0.18 |
| BSU20929 | <i>yoyI</i> | 2.26  | 1.35 | 0.60 | 0.02 |
| BSU20930 | <i>yopD</i> | 1.77  | 1.24 | 0.70 | 0.09 |
| BSU20940 | <i>yopC</i> | 1.07  | 0.73 | 0.68 | 0.29 |
| BSU20960 | <i>yopA</i> | 1.23  | 0.48 | 0.39 | 0.02 |
| BSU20990 | <i>yonU</i> | 6.91  | 5.11 | 0.74 | 0.23 |
| BSU20999 | <i>yoyJ</i> | 4.96  | 4.19 | 0.84 | 0.43 |
| BSU21000 | <i>yonT</i> | 1.25  | 2.12 | 1.70 | 0.12 |
| BSU21020 | <i>yonR</i> | 0.23  | 1.53 | 6.54 | 0.03 |
| BSU21050 | <i>yonN</i> | 1.11  | 0.85 | 0.76 | 0.11 |
| BSU21080 | <i>yonI</i> | 2.02  | 0.87 | 0.43 | 0.09 |
| BSU21140 | <i>yonC</i> | 1.44  | 1.48 | 1.03 | 0.89 |
| BSU21150 | <i>yonB</i> | 1.29  | 1.39 | 1.08 | 0.60 |
| BSU21160 | <i>yonA</i> | 1.48  | 1.39 | 0.94 | 0.78 |
| BSU21170 | <i>yomZ</i> | 1.06  | 1.28 | 1.21 | 0.41 |
| BSU21180 | <i>yomY</i> | 1.33  | 1.62 | 1.22 | 0.40 |
| BSU21220 | <i>yomU</i> | 1.12  | 0.99 | 0.88 | 0.50 |
| BSU21229 | <i>youA</i> | 1.40  | 1.01 | 0.72 | 0.15 |
| BSU21230 | <i>yomT</i> | 1.64  | 1.03 | 0.63 | 0.03 |
| BSU21320 | <i>yomL</i> | 1.61  | 0.41 | 0.26 | 0.00 |
| BSU21329 | <i>youB</i> | 1.81  | 0.80 | 0.44 | 0.02 |
| BSU21340 | <i>yomJ</i> | 1.14  | 0.32 | 0.28 | 0.01 |
| BSU21440 | <i>bdbB</i> | 6.18  | 0.78 | 0.13 | 0.00 |
| BSU21450 | <i>yolJ</i> | 4.17  | 0.54 | 0.13 | 0.00 |
| BSU21460 | <i>bdbA</i> | 3.22  | 0.36 | 0.11 | 0.01 |
| BSU21470 | <i>sunT</i> | 2.39  | 1.20 | 0.50 | 0.18 |
| BSU21480 | <i>sunA</i> | 63.24 | 9.37 | 0.15 | 0.01 |
| BSU21490 | <i>sunI</i> | 9.21  | 2.44 | 0.26 | 0.04 |
| BSU21530 | <i>yolB</i> | 9.45  | 0.75 | 0.08 | 0.00 |

|          |             |        |        |      |      |
|----------|-------------|--------|--------|------|------|
| BSU21540 | <i>yolA</i> | 12.31  | 1.22   | 0.10 | 0.00 |
| BSU21550 | <i>yokL</i> | 1.93   | 0.94   | 0.49 | 0.03 |
| BSU21560 | <i>yokK</i> | 1.36   | 0.83   | 0.61 | 0.10 |
| BSU21590 | <i>yokH</i> | 1.57   | 0.46   | 0.29 | 0.01 |
| BSU21600 | <i>yokG</i> | 1.24   | 0.58   | 0.47 | 0.01 |
| BSU21610 | <i>yokF</i> | 1.80   | 0.80   | 0.44 | 0.00 |
| BSU21620 | <i>yokE</i> | 3.43   | 0.72   | 0.21 | 0.00 |
| BSU21680 | <i>yppQ</i> | 3.36   | 2.02   | 0.60 | 0.04 |
| BSU21690 | <i>msrA</i> | 2.47   | 1.93   | 0.78 | 0.04 |
| BSU21700 | <i>yppP</i> | 4.09   | 1.66   | 0.41 | 0.01 |
| BSU21720 | <i>yppM</i> | 2.47   | 1.26   | 0.51 | 0.00 |
| BSU21730 | <i>yppS</i> | 2.33   | 1.53   | 0.65 | 0.02 |
| BSU21740 | <i>yppR</i> | 1.34   | 1.17   | 0.87 | 0.31 |
| BSU21760 | <i>yppP</i> | 5.96   | 3.71   | 0.62 | 0.02 |
| BSU21770 | <i>ilvA</i> | 1.05   | 0.50   | 0.47 | 0.00 |
| BSU21780 | <i>yplP</i> | 1.07   | 1.15   | 1.07 | 0.53 |
| BSU21790 | <i>yplQ</i> | 1.65   | 1.80   | 1.09 | 0.46 |
| BSU21800 | <i>ypkP</i> | 4.53   | 2.74   | 0.61 | 0.00 |
| BSU21810 | <i>dfrA</i> | 2.77   | 1.93   | 0.70 | 0.02 |
| BSU21820 | <i>thyA</i> | 1.64   | 1.43   | 0.87 | 0.01 |
| BSU21830 | <i>ypjQ</i> | 6.71   | 3.25   | 0.48 | 0.00 |
| BSU21840 | <i>ypjP</i> | 2.77   | 2.31   | 0.83 | 0.04 |
| BSU21850 | <i>ypiP</i> | 1.06   | 1.12   | 1.06 | 0.20 |
| BSU21860 | <i>yphP</i> | 8.39   | 4.63   | 0.55 | 0.01 |
| BSU21880 | <i>yppR</i> | 3.32   | 1.98   | 0.60 | 0.00 |
| BSU21920 | <i>ugtP</i> | 3.70   | 2.47   | 0.67 | 0.01 |
| BSU21930 | <i>cspD</i> | 494.68 | 366.30 | 0.74 | 0.07 |
| BSU21940 | <i>degR</i> | 6.00   | 6.75   | 1.12 | 0.74 |
| BSU22000 | <i>sspL</i> | 1.19   | 1.26   | 1.06 | 0.72 |
| BSU22010 | <i>exoA</i> | 1.31   | 1.85   | 1.41 | 0.00 |
| BSU22019 | <i>ypzF</i> | 2.40   | 1.57   | 0.65 | 0.09 |
| BSU22020 | <i>yphS</i> | 2.45   | 1.47   | 0.60 | 0.00 |
| BSU22060 | <i>pbuX</i> | 1.12   | 0.76   | 0.68 | 0.14 |
| BSU22080 | <i>ypwA</i> | 10.12  | 4.44   | 0.44 | 0.00 |
| BSU22130 | <i>kduL</i> | 1.03   | 0.90   | 0.87 | 0.02 |
| BSU22150 | <i>ypvA</i> | 1.17   | 2.55   | 2.19 | 0.00 |
| BSU22160 | <i>yptA</i> | 0.84   | 1.20   | 1.43 | 0.08 |
| BSU22169 | <i>ypzG</i> | 1.67   | 2.75   | 1.64 | 0.02 |
| BSU22170 | <i>yphC</i> | 1.78   | 1.87   | 1.05 | 0.56 |
| BSU22180 | <i>yphB</i> | 30.03  | 8.43   | 0.28 | 0.01 |
| BSU22190 | <i>yphA</i> | 1.76   | 1.93   | 1.09 | 0.56 |
| BSU22200 | <i>cotD</i> | 6.02   | 8.28   | 1.37 | 0.03 |
| BSU22210 | <i>yprB</i> | 1.38   | 1.89   | 1.37 | 0.00 |
| BSU22220 | <i>yprA</i> | 0.83   | 1.11   | 1.34 | 0.01 |
| BSU22230 | <i>ypqE</i> | 4.81   | 1.96   | 0.41 | 0.00 |
| BSU22260 | <i>yppF</i> | 9.84   | 0.80   | 0.08 | 0.01 |
| BSU22270 | <i>yppE</i> | 1.66   | 1.50   | 0.91 | 0.46 |
| BSU22300 | <i>yppC</i> | 0.92   | 2.49   | 2.71 | 0.00 |
| BSU22310 | <i>recU</i> | 2.19   | 3.43   | 1.57 | 0.10 |
| BSU22320 | <i>ponA</i> | 6.31   | 5.04   | 0.80 | 0.09 |

|          |             |        |        |       |      |
|----------|-------------|--------|--------|-------|------|
| BSU22330 | <i>ypoC</i> | 4.60   | 5.05   | 1.10  | 0.21 |
| BSU22340 | <i>nth</i>  | 4.30   | 5.01   | 1.17  | 0.01 |
| BSU22350 | <i>dnaD</i> | 3.32   | 4.01   | 1.21  | 0.27 |
| BSU22360 | <i>asnC</i> | 27.53  | 18.96  | 0.69  | 0.00 |
| BSU22370 | <i>aspB</i> | 17.50  | 8.89   | 0.51  | 0.00 |
| BSU22380 | <i>ypmB</i> | 9.78   | 7.52   | 0.77  | 0.09 |
| BSU22390 | <i>ypmA</i> | 4.45   | 4.89   | 1.10  | 0.48 |
| BSU22400 | <i>dinG</i> | 1.97   | 2.65   | 1.34  | 0.00 |
| BSU22410 | <i>panD</i> | 13.01  | 8.59   | 0.66  | 0.00 |
| BSU22420 | <i>panC</i> | 12.19  | 9.40   | 0.77  | 0.00 |
| BSU22430 | <i>panB</i> | 9.78   | 9.62   | 0.98  | 0.87 |
| BSU22440 | <i>birA</i> | 5.12   | 5.35   | 1.04  | 0.33 |
| BSU22450 | <i>cca</i>  | 6.63   | 5.60   | 0.84  | 0.01 |
| BSU22460 | <i>ypjH</i> | 6.63   | 5.03   | 0.76  | 0.00 |
| BSU22470 | <i>ypjG</i> | 5.90   | 4.55   | 0.77  | 0.01 |
| BSU22480 | <i>mgsA</i> | 5.05   | 4.07   | 0.81  | 0.04 |
| BSU22490 | <i>dapB</i> | 2.53   | 2.67   | 1.05  | 0.51 |
| BSU22500 | <i>ypjD</i> | 1.22   | 1.92   | 1.57  | 0.06 |
| BSU22510 | <i>ypjC</i> | 1.17   | 1.31   | 1.12  | 0.32 |
| BSU22540 | <i>qcrC</i> | 3.03   | 1.60   | 0.53  | 0.00 |
| BSU22550 | <i>qcrB</i> | 2.57   | 1.93   | 0.75  | 0.01 |
| BSU22560 | <i>qcrA</i> | 2.52   | 1.48   | 0.59  | 0.00 |
| BSU22570 | <i>ypiF</i> | 1.05   | 0.75   | 0.71  | 0.11 |
| BSU22580 | <i>ypiB</i> | 16.45  | 3.08   | 0.19  | 0.00 |
| BSU22590 | <i>ypiA</i> | 1.58   | 1.91   | 1.21  | 0.17 |
| BSU22600 | <i>aroE</i> | 5.71   | 11.25  | 1.97  | 0.00 |
| BSU22610 | <i>tyrA</i> | 2.82   | 8.69   | 3.08  | 0.00 |
| BSU22620 | <i>hisC</i> | 2.34   | 9.32   | 3.98  | 0.00 |
| BSU22630 | <i>trpA</i> | 0.76   | 8.43   | 11.06 | 0.00 |
| BSU22640 | <i>trpB</i> | 0.12   | 5.94   | 48.13 | 0.00 |
| BSU22650 | <i>trpF</i> | 0.10   | 4.33   | 42.84 | 0.00 |
| BSU22660 | <i>trpC</i> | 0.13   | 3.85   | 29.40 | 0.00 |
| BSU22670 | <i>trpD</i> | 0.11   | 2.99   | 27.02 | 0.00 |
| BSU22680 | <i>trpE</i> | 0.11   | 1.65   | 14.46 | 0.00 |
| BSU22690 | <i>aroH</i> | 7.06   | 4.91   | 0.69  | 0.01 |
| BSU22700 | <i>aroB</i> | 4.45   | 3.67   | 0.83  | 0.03 |
| BSU22710 | <i>aroF</i> | 2.74   | 2.75   | 1.00  | 0.97 |
| BSU22730 | <i>ndk</i>  | 78.85  | 41.75  | 0.53  | 0.00 |
| BSU22740 | <i>hepT</i> | 8.18   | 10.34  | 1.26  | 0.09 |
| BSU22750 | <i>ubiE</i> | 5.98   | 9.93   | 1.66  | 0.00 |
| BSU22760 | <i>hepS</i> | 4.28   | 6.65   | 1.55  | 0.15 |
| BSU22770 | <i>mtrB</i> | 9.42   | 13.93  | 1.48  | 0.00 |
| BSU22780 | <i>folE</i> | 6.98   | 12.12  | 1.74  | 0.00 |
| BSU22790 | <i>hbs</i>  | 698.93 | 398.61 | 0.57  | 0.00 |
| BSU22810 | <i>yphF</i> | 0.70   | 1.25   | 1.80  | 0.00 |
| BSU22820 | <i>yphE</i> | 0.74   | 1.44   | 1.94  | 0.00 |
| BSU22830 | <i>gpsA</i> | 8.99   | 9.80   | 1.09  | 0.06 |
| BSU22840 | <i>engA</i> | 4.91   | 6.31   | 1.29  | 0.00 |
| BSU22870 | <i>fni</i>  | 10.40  | 5.68   | 0.55  | 0.00 |
| BSU22880 | <i>rpsA</i> | 43.30  | 17.15  | 0.40  | 0.00 |

|          |             |       |       |      |      |
|----------|-------------|-------|-------|------|------|
| BSU22890 | <i>cmk</i>  | 2.73  | 3.61  | 1.32 | 0.02 |
| BSU22900 | <i>ypfB</i> | 1.43  | 1.25  | 0.87 | 0.57 |
| BSU22940 | <i>prsW</i> | 1.93  | 1.61  | 0.83 | 0.25 |
| BSU22950 | <i>ypdA</i> | 4.33  | 2.90  | 0.67 | 0.01 |
| BSU22960 | <i>gudB</i> | 38.82 | 14.58 | 0.38 | 0.00 |
| BSU22970 | <i>ypbH</i> | 4.56  | 1.88  | 0.41 | 0.00 |
| BSU22980 | <i>ypbG</i> | 1.14  | 0.40  | 0.35 | 0.00 |
| BSU23000 | <i>ypbE</i> | 1.62  | 1.55  | 0.96 | 0.76 |
| BSU23010 | <i>ypbD</i> | 2.01  | 1.79  | 0.89 | 0.19 |
| BSU23020 | <i>recQ</i> | 1.10  | 1.23  | 1.12 | 0.07 |
| BSU23040 | <i>fer</i>  | 34.53 | 26.80 | 0.78 | 0.15 |
| BSU23050 | <i>fmnP</i> | 1.21  | 1.44  | 1.19 | 0.45 |
| BSU23060 | <i>ypzE</i> | 1.01  | 4.68  | 4.65 | 0.01 |
| BSU23070 | <i>serA</i> | 4.80  | 2.20  | 0.46 | 0.00 |
| BSU23090 | <i>rsiX</i> | 4.23  | 2.73  | 0.65 | 0.02 |
| BSU23100 | <i>sigX</i> | 3.44  | 4.47  | 1.30 | 0.10 |
| BSU23110 | <i>resE</i> | 8.39  | 11.39 | 1.36 | 0.01 |
| BSU23120 | <i>resD</i> | 9.17  | 12.97 | 1.41 | 0.01 |
| BSU23130 | <i>resC</i> | 6.54  | 10.74 | 1.64 | 0.00 |
| BSU23140 | <i>resB</i> | 6.19  | 9.93  | 1.60 | 0.00 |
| BSU23150 | <i>resA</i> | 7.21  | 13.14 | 1.82 | 0.00 |
| BSU23160 | <i>rluB</i> | 4.04  | 6.15  | 1.52 | 0.00 |
| BSU23200 | <i>ypul</i> | 1.36  | 2.61  | 1.91 | 0.00 |
| BSU23210 | <i>spcB</i> | 0.97  | 2.33  | 2.41 | 0.00 |
| BSU23220 | <i>scpA</i> | 0.63  | 2.15  | 3.42 | 0.00 |
| BSU23240 | <i>ypzK</i> | 5.58  | 6.38  | 1.14 | 0.22 |
| BSU23250 | <i>ribH</i> | 3.42  | 6.29  | 1.84 | 0.00 |
| BSU23260 | <i>ribA</i> | 1.99  | 5.06  | 2.55 | 0.00 |
| BSU23270 | <i>ribE</i> | 1.27  | 3.83  | 3.02 | 0.00 |
| BSU23280 | <i>ribD</i> | 1.39  | 9.76  | 7.00 | 0.00 |
| BSU23300 | <i>ypuD</i> | 1.14  | 0.82  | 0.72 | 0.09 |
| BSU23310 | <i>sipS</i> | 3.00  | 3.96  | 1.32 | 0.05 |
| BSU23350 | <i>ypzD</i> | 1.05  | 0.13  | 0.13 | 0.00 |
| BSU23360 | <i>ppiB</i> | 36.51 | 22.34 | 0.61 | 0.01 |
| BSU23370 | <i>ypuA</i> | 21.13 | 4.72  | 0.22 | 0.00 |
| BSU23380 | <i>lysA</i> | 1.89  | 1.48  | 0.78 | 0.06 |
| BSU23490 | <i>pupG</i> | 33.28 | 17.11 | 0.51 | 0.00 |
| BSU23500 | <i>drm</i>  | 17.57 | 12.96 | 0.74 | 0.00 |
| BSU23510 | <i>xerD</i> | 1.57  | 1.21  | 0.77 | 0.00 |
| BSU23520 | <i>fur</i>  | 4.75  | 4.32  | 0.91 | 0.39 |
| BSU23550 | <i>mleA</i> | 37.45 | 19.51 | 0.52 | 0.00 |
| BSU23560 | <i>mleN</i> | 21.85 | 13.14 | 0.60 | 0.00 |
| BSU23570 | <i>aspA</i> | 22.12 | 8.23  | 0.37 | 0.00 |
| BSU23580 | <i>ansA</i> | 6.60  | 4.46  | 0.68 | 0.00 |
| BSU23590 | <i>ansR</i> | 2.32  | 2.83  | 1.22 | 0.06 |
| BSU23600 | <i>yqxK</i> | 2.79  | 2.56  | 0.92 | 0.27 |
| BSU23610 | <i>nudF</i> | 2.93  | 3.26  | 1.11 | 0.26 |
| BSU23620 | <i>yqkF</i> | 1.95  | 1.20  | 0.61 | 0.00 |
| BSU23650 | <i>yqkC</i> | 5.57  | 6.92  | 1.24 | 0.07 |
| BSU23660 | <i>yqkB</i> | 2.84  | 3.29  | 1.16 | 0.23 |

|          |              |       |       |      |      |
|----------|--------------|-------|-------|------|------|
| BSU23720 | <i>yqzH</i>  | 0.54  | 1.21  | 2.23 | 0.01 |
| BSU23740 | <i>yqjU</i>  | 4.19  | 2.97  | 0.71 | 0.00 |
| BSU23750 | <i>yqjT</i>  | 4.35  | 3.40  | 0.78 | 0.07 |
| BSU23760 | <i>coaA</i>  | 1.93  | 1.63  | 0.84 | 0.03 |
| BSU23820 | <i>yqjM</i>  | 4.92  | 4.62  | 0.94 | 0.15 |
| BSU23830 | <i>yqjL</i>  | 4.97  | 0.45  | 0.09 | 0.00 |
| BSU23850 | <i>zwf</i>   | 11.35 | 8.73  | 0.77 | 0.02 |
| BSU23860 | <i>yqjI</i>  | 34.25 | 14.21 | 0.41 | 0.00 |
| BSU23880 | <i>yqzJ</i>  | 4.60  | 2.74  | 0.60 | 0.00 |
| BSU23890 | <i>yqjG</i>  | 5.75  | 3.41  | 0.59 | 0.00 |
| BSU23900 | <i>yqjF</i>  | 0.62  | 1.53  | 2.49 | 0.00 |
| BSU23910 | <i>yqjE</i>  | 5.42  | 9.29  | 1.71 | 0.01 |
| BSU23920 | <i>yqjD</i>  | 2.25  | 6.26  | 2.79 | 0.00 |
| BSU23950 | <i>yqjA</i>  | 0.65  | 1.12  | 1.74 | 0.00 |
| BSU23990 | <i>yqiW</i>  | 12.13 | 4.96  | 0.41 | 0.00 |
| BSU24000 | <i>bmrU</i>  | 2.34  | 2.56  | 1.10 | 0.32 |
| BSU24010 | <i>bmr</i>   | 2.49  | 3.74  | 1.50 | 0.00 |
| BSU24030 | <i>bkdB</i>  | 10.81 | 7.18  | 0.66 | 0.01 |
| BSU24040 | <i>bkdAB</i> | 8.55  | 7.91  | 0.93 | 0.69 |
| BSU24050 | <i>bkdAA</i> | 7.83  | 7.03  | 0.90 | 0.45 |
| BSU24060 | <i>lpdV</i>  | 6.34  | 5.04  | 0.79 | 0.16 |
| BSU24070 | <i>buk</i>   | 5.58  | 4.66  | 0.83 | 0.18 |
| BSU24080 | <i>bcd</i>   | 5.44  | 5.07  | 0.93 | 0.67 |
| BSU24090 | <i>ptb</i>   | 3.85  | 3.19  | 0.83 | 0.12 |
| BSU24100 | <i>bkdR</i>  | 1.45  | 2.31  | 1.59 | 0.00 |
| BSU24110 | <i>yqzF</i>  | 1.01  | 0.30  | 0.30 | 0.06 |
| BSU24210 | <i>yqiG</i>  | 6.52  | 2.85  | 0.44 | 0.00 |
| BSU24220 | <i>spo0A</i> | 4.96  | 1.95  | 0.39 | 0.00 |
| BSU24240 | <i>recN</i>  | 2.54  | 3.55  | 1.39 | 0.00 |
| BSU24250 | <i>ahrC</i>  | 1.84  | 3.44  | 1.87 | 0.00 |
| BSU24260 | <i>yqxC</i>  | 6.96  | 11.47 | 1.65 | 0.00 |
| BSU24270 | <i>dxs</i>   | 4.14  | 7.60  | 1.84 | 0.00 |
| BSU24280 | <i>ispA</i>  | 1.31  | 4.01  | 3.06 | 0.00 |
| BSU24290 | <i>xseB</i>  | 1.04  | 2.98  | 2.86 | 0.00 |
| BSU24300 | <i>xseA</i>  | 0.74  | 2.40  | 3.24 | 0.00 |
| BSU24310 | <i>folD</i>  | 11.51 | 9.21  | 0.80 | 0.02 |
| BSU24320 | <i>nusB</i>  | 9.31  | 11.68 | 1.26 | 0.06 |
| BSU24330 | <i>yqhY</i>  | 33.52 | 20.26 | 0.60 | 0.03 |
| BSU24340 | <i>accC</i>  | 14.20 | 11.52 | 0.81 | 0.01 |
| BSU24350 | <i>accB</i>  | 4.58  | 4.68  | 1.02 | 0.84 |
| BSU24450 | <i>efp</i>   | 29.96 | 18.43 | 0.62 | 0.01 |
| BSU24460 | <i>yqhT</i>  | 19.88 | 32.85 | 1.65 | 0.01 |
| BSU24470 | <i>yqhS</i>  | 11.10 | 6.30  | 0.57 | 0.00 |
| BSU24490 | <i>yqhQ</i>  | 2.96  | 3.16  | 1.07 | 0.21 |
| BSU24500 | <i>yqhP</i>  | 6.74  | 4.81  | 0.71 | 0.03 |
| BSU24520 | <i>mntR</i>  | 5.50  | 4.12  | 0.75 | 0.13 |
| BSU24530 | <i>yqhM</i>  | 2.51  | 1.87  | 0.74 | 0.09 |
| BSU24540 | <i>yqhL</i>  | 2.56  | 1.87  | 0.73 | 0.05 |
| BSU24550 | <i>gcvPB</i> | 1.80  | 0.76  | 0.42 | 0.01 |
| BSU24560 | <i>gcvPA</i> | 1.57  | 0.73  | 0.47 | 0.03 |

|          |              |        |       |      |      |
|----------|--------------|--------|-------|------|------|
| BSU24570 | <i>gcvT</i>  | 1.28   | 0.88  | 0.68 | 0.01 |
| BSU24600 | <i>sinI</i>  | 1.36   | 0.66  | 0.49 | 0.00 |
| BSU24610 | <i>sinR</i>  | 8.18   | 3.84  | 0.47 | 0.00 |
| BSU24620 | <i>tasA</i>  | 0.79   | 1.01  | 1.28 | 0.16 |
| BSU24760 | <i>rsbRD</i> | 2.45   | 2.45  | 1.00 | 1.00 |
| BSU24770 | <i>mgsR</i>  | 14.64  | 13.30 | 0.91 | 0.66 |
| BSU24780 | <i>yqgY</i>  | 1.47   | 1.08  | 0.74 | 0.33 |
| BSU24790 | <i>yqgX</i>  | 14.82  | 8.45  | 0.57 | 0.00 |
| BSU24800 | <i>yqgW</i>  | 3.63   | 2.08  | 0.57 | 0.14 |
| BSU24810 | <i>yqgV</i>  | 2.89   | 2.37  | 0.82 | 0.07 |
| BSU24820 | <i>yqgU</i>  | 2.02   | 2.69  | 1.33 | 0.01 |
| BSU24840 | <i>yqgS</i>  | 2.68   | 2.70  | 1.01 | 0.96 |
| BSU24850 | <i>glcK</i>  | 1.52   | 2.41  | 1.58 | 0.00 |
| BSU24860 | <i>yqgQ</i>  | 1.28   | 1.76  | 1.37 | 0.21 |
| BSU24880 | <i>yqgO</i>  | 3.18   | 1.30  | 0.41 | 0.00 |
| BSU24890 | <i>yqgN</i>  | 3.83   | 1.84  | 0.48 | 0.00 |
| BSU24900 | <i>rpmG</i>  | 65.51  | 27.56 | 0.42 | 0.11 |
| BSU24930 | <i>yqzD</i>  | 12.35  | 5.57  | 0.45 | 0.00 |
| BSU24940 | <i>yqzC</i>  | 16.35  | 6.01  | 0.37 | 0.00 |
| BSU24990 | <i>pstS</i>  | 3.72   | 0.17  | 0.04 | 0.00 |
| BSU25000 | <i>pbpA</i>  | 5.45   | 7.48  | 1.37 | 0.02 |
| BSU25020 | <i>sodA</i>  | 191.18 | 83.28 | 0.44 | 0.01 |
| BSU25030 | <i>yqgC</i>  | 3.04   | 2.97  | 0.98 | 0.92 |
| BSU25040 | <i>yqgB</i>  | 4.39   | 3.39  | 0.77 | 0.21 |
| BSU25050 | <i>yqgA</i>  | 145.82 | 54.52 | 0.37 | 0.00 |
| BSU25070 | <i>ispG</i>  | 4.16   | 2.97  | 0.71 | 0.07 |
| BSU25080 | <i>yqfX</i>  | 0.54   | 1.12  | 2.06 | 0.00 |
| BSU25090 | <i>yqfW</i>  | 1.89   | 1.48  | 0.79 | 0.21 |
| BSU25100 | <i>zur</i>   | 6.63   | 2.82  | 0.43 | 0.00 |
| BSU25110 | <i>yqfU</i>  | 1.31   | 1.10  | 0.84 | 0.17 |
| BSU25130 | <i>yqfS</i>  | 7.35   | 7.69  | 1.05 | 0.59 |
| BSU25140 | <i>cshB</i>  | 4.37   | 5.61  | 1.28 | 0.02 |
| BSU25160 | <i>ispH</i>  | 1.07   | 1.40  | 1.31 | 0.02 |
| BSU25170 | <i>yqfO</i>  | 5.12   | 3.53  | 0.69 | 0.00 |
| BSU25180 | <i>trmK</i>  | 2.76   | 2.59  | 0.94 | 0.18 |
| BSU25190 | <i>cccA</i>  | 0.55   | 1.55  | 2.82 | 0.00 |
| BSU25200 | <i>sigA</i>  | 18.66  | 12.84 | 0.69 | 0.00 |
| BSU25210 | <i>dnaG</i>  | 8.65   | 5.09  | 0.59 | 0.00 |
| BSU25220 | <i>antE</i>  | 13.98  | 6.62  | 0.47 | 0.00 |
| BSU25230 | <i>yqxD</i>  | 5.56   | 5.13  | 0.92 | 0.37 |
| BSU25240 | <i>yqfL</i>  | 5.21   | 5.39  | 1.04 | 0.59 |
| BSU25250 | <i>ccpN</i>  | 3.70   | 6.90  | 1.87 | 0.00 |
| BSU25260 | <i>glyS</i>  | 9.17   | 9.41  | 1.03 | 0.76 |
| BSU25270 | <i>glyQ</i>  | 3.96   | 5.83  | 1.47 | 0.00 |
| BSU25280 | <i>recO</i>  | 6.34   | 7.44  | 1.17 | 0.30 |
| BSU25289 | <i>yqzL</i>  | 10.81  | 10.44 | 0.97 | 0.88 |
| BSU25290 | <i>era</i>   | 5.39   | 6.59  | 1.22 | 0.01 |
| BSU25300 | <i>cdd</i>   | 4.62   | 5.89  | 1.28 | 0.04 |
| BSU25310 | <i>dgkA</i>  | 3.93   | 3.19  | 0.81 | 0.01 |
| BSU25320 | <i>yqfG</i>  | 5.15   | 3.64  | 0.71 | 0.00 |

|          |              |        |        |      |      |
|----------|--------------|--------|--------|------|------|
| BSU25330 | <i>yqfF</i>  | 2.54   | 2.19   | 0.86 | 0.11 |
| BSU25340 | <i>phoH</i>  | 9.08   | 3.60   | 0.40 | 0.00 |
| BSU25370 | <i>yqfB</i>  | 14.95  | 16.94  | 1.13 | 0.25 |
| BSU25380 | <i>yqfA</i>  | 16.25  | 19.93  | 1.23 | 0.13 |
| BSU25390 | <i>yqeZ</i>  | 12.91  | 14.13  | 1.09 | 0.19 |
| BSU25400 | <i>yqeY</i>  | 413.95 | 166.13 | 0.40 | 0.00 |
| BSU25410 | <i>rpsU</i>  | 659.19 | 289.91 | 0.44 | 0.00 |
| BSU25430 | <i>rimO</i>  | 9.71   | 8.46   | 0.87 | 0.04 |
| BSU25440 | <i>yqeU</i>  | 4.54   | 5.11   | 1.12 | 0.21 |
| BSU25450 | <i>prmA</i>  | 6.12   | 11.17  | 1.82 | 0.00 |
| BSU25460 | <i>dnaJ</i>  | 8.82   | 10.91  | 1.24 | 0.11 |
| BSU25470 | <i>dnaK</i>  | 63.43  | 50.04  | 0.79 | 0.14 |
| BSU25480 | <i>grpE</i>  | 46.63  | 38.40  | 0.82 | 0.13 |
| BSU25490 | <i>hrcA</i>  | 14.87  | 8.39   | 0.56 | 0.01 |
| BSU25500 | <i>hemN</i>  | 1.85   | 2.34   | 1.26 | 0.00 |
| BSU25510 | <i>lepA</i>  | 3.75   | 4.19   | 1.12 | 0.33 |
| BSU25550 | <i>rpsT</i>  | 575.67 | 259.51 | 0.45 | 0.00 |
| BSU25560 | <i>holA</i>  | 1.57   | 1.54   | 0.98 | 0.87 |
| BSU25569 | <i>yqzM</i>  | 2.16   | 2.71   | 1.25 | 0.51 |
| BSU25580 | <i>comEB</i> | 0.67   | 1.13   | 1.69 | 0.00 |
| BSU25610 | <i>yqeM</i>  | 9.76   | 10.63  | 1.09 | 0.09 |
| BSU25620 | <i>yqeL</i>  | 10.89  | 12.72  | 1.17 | 0.00 |
| BSU25630 | <i>yqeK</i>  | 6.02   | 7.82   | 1.30 | 0.09 |
| BSU25640 | <i>nadD</i>  | 5.63   | 8.29   | 1.47 | 0.01 |
| BSU25650 | <i>yqel</i>  | 6.80   | 9.22   | 1.36 | 0.03 |
| BSU25660 | <i>aroE</i>  | 5.16   | 6.93   | 1.34 | 0.01 |
| BSU25670 | <i>yqeH</i>  | 2.44   | 3.86   | 1.58 | 0.00 |
| BSU25680 | <i>yqeG</i>  | 0.77   | 1.78   | 2.30 | 0.00 |
| BSU25690 | <i>sda</i>   | 1.04   | 1.86   | 1.79 | 0.17 |
| BSU25700 | <i>yqeF</i>  | 0.72   | 1.09   | 1.51 | 0.01 |
| BSU25720 | <i>yqeD</i>  | 0.31   | 1.12   | 3.61 | 0.00 |
| BSU25740 | <i>yqeB</i>  | 1.09   | 0.38   | 0.35 | 0.00 |
| BSU25840 | <i>phrE</i>  | 8.06   | 2.24   | 0.28 | 0.01 |
| BSU25870 | <i>yqcF</i>  | 2.02   | 0.85   | 0.42 | 0.00 |
| BSU26050 | <i>yqdB</i>  | 3.33   | 2.17   | 0.65 | 0.37 |
| BSU26230 | <i>yqaP</i>  | 5.69   | 1.71   | 0.30 | 0.00 |
| BSU26610 | <i>yrkA</i>  | 2.53   | 2.08   | 0.82 | 0.26 |
| BSU26640 | <i>yrdP</i>  | 3.09   | 0.19   | 0.06 | 0.00 |
| BSU26650 | <i>czcD</i>  | 1.86   | 0.18   | 0.10 | 0.01 |
| BSU26680 | <i>yrdK</i>  | 1.31   | 0.67   | 0.51 | 0.00 |
| BSU26760 | <i>yrdC</i>  | 1.23   | 0.55   | 0.45 | 0.01 |
| BSU26820 | <i>yrdD</i>  | 11.96  | 2.20   | 0.18 | 0.00 |
| BSU26890 | <i>csn</i>   | 1.02   | 0.36   | 0.36 | 0.00 |
| BSU26900 | <i>yraL</i>  | 2.38   | 0.91   | 0.38 | 0.01 |
| BSU27020 | <i>yraA</i>  | 11.22  | 5.19   | 0.46 | 0.00 |
| BSU27100 | <i>yrhP</i>  | 1.00   | 2.15   | 2.14 | 0.03 |
| BSU27150 | <i>yrhK</i>  | 1.02   | 0.41   | 0.40 | 0.00 |
| BSU27160 | <i>cypB</i>  | 1.40   | 0.44   | 0.32 | 0.00 |
| BSU27180 | <i>yrhH</i>  | 1.12   | 0.37   | 0.33 | 0.01 |
| BSU27190 | <i>yrzI</i>  | 4.12   | 4.22   | 1.02 | 0.92 |

|          |              |       |       |      |      |
|----------|--------------|-------|-------|------|------|
| BSU27200 | <i>yrhG</i>  | 7.27  | 9.03  | 1.24 | 0.01 |
| BSU27210 | <i>yrhF</i>  | 2.73  | 2.53  | 0.92 | 0.71 |
| BSU27220 | <i>yrhE</i>  | 3.85  | 2.74  | 0.71 | 0.02 |
| BSU27230 | <i>yrhD</i>  | 7.95  | 4.16  | 0.52 | 0.02 |
| BSU27270 | <i>mtn</i>   | 4.52  | 4.36  | 0.96 | 0.73 |
| BSU27280 | <i>yrrT</i>  | 1.28  | 3.62  | 2.83 | 0.01 |
| BSU27290 | <i>yrzA</i>  | 1.64  | 0.67  | 0.41 | 0.02 |
| BSU27300 | <i>yrrS</i>  | 1.45  | 2.12  | 1.46 | 0.00 |
| BSU27320 | <i>greA</i>  | 17.21 | 14.19 | 0.82 | 0.07 |
| BSU27330 | <i>udk</i>   | 14.74 | 8.75  | 0.59 | 0.00 |
| BSU27340 | <i>yrrO</i>  | 7.33  | 6.82  | 0.93 | 0.35 |
| BSU27350 | <i>yrrN</i>  | 3.31  | 4.13  | 1.25 | 0.00 |
| BSU27360 | <i>yrrM</i>  | 2.39  | 4.29  | 1.79 | 0.00 |
| BSU27370 | <i>yrrL</i>  | 2.99  | 2.80  | 0.94 | 0.70 |
| BSU27380 | <i>yrzB</i>  | 50.05 | 21.75 | 0.43 | 0.00 |
| BSU27390 | <i>yrrK</i>  | 22.41 | 12.44 | 0.55 | 0.00 |
| BSU27400 | <i>yrzL</i>  | 12.02 | 8.68  | 0.72 | 0.00 |
| BSU27410 | <i>alaS</i>  | 4.54  | 4.12  | 0.91 | 0.36 |
| BSU27468 | <i>yrzQ</i>  | 0.43  | 1.19  | 2.80 | 0.02 |
| BSU27469 | <i>yrzR</i>  | 0.61  | 2.00  | 3.30 | 0.00 |
| BSU27470 | <i>yrrD</i>  | 0.35  | 1.04  | 3.00 | 0.00 |
| BSU27480 | <i>yrrC</i>  | 2.96  | 3.42  | 1.15 | 0.06 |
| BSU27490 | <i>yrrB</i>  | 1.99  | 3.40  | 1.71 | 0.01 |
| BSU27500 | <i>mnmA</i>  | 7.47  | 8.76  | 1.17 | 0.19 |
| BSU27510 | <i>iscS</i>  | 3.78  | 6.50  | 1.72 | 0.01 |
| BSU27520 | <i>cymR</i>  | 1.04  | 1.34  | 1.29 | 0.02 |
| BSU27540 | <i>yrvM</i>  | 2.87  | 3.40  | 1.18 | 0.04 |
| BSU27550 | <i>aspS</i>  | 8.32  | 6.76  | 0.81 | 0.14 |
| BSU27560 | <i>hisS</i>  | 2.52  | 2.36  | 0.94 | 0.23 |
| BSU27570 | <i>yrzK</i>  | 0.34  | 1.89  | 5.62 | 0.00 |
| BSU27580 | <i>yrvJ</i>  | 2.08  | 2.54  | 1.22 | 0.16 |
| BSU27590 | <i>yrvI</i>  | 6.88  | 6.25  | 0.91 | 0.47 |
| BSU27600 | <i>relA</i>  | 3.68  | 4.15  | 1.13 | 0.10 |
| BSU27610 | <i>apt</i>   | 11.42 | 18.84 | 1.65 | 0.01 |
| BSU27620 | <i>recJ</i>  | 3.61  | 12.69 | 3.51 | 0.00 |
| BSU27630 | <i>yrvD</i>  | 4.07  | 3.90  | 0.96 | 0.84 |
| BSU27640 | <i>yrvC</i>  | 2.68  | 3.50  | 1.31 | 0.01 |
| BSU27650 | <i>secDF</i> | 19.13 | 19.66 | 1.03 | 0.72 |
| BSU27660 | <i>comN</i>  | 6.80  | 9.06  | 1.33 | 0.10 |
| BSU27700 | <i>yajC</i>  | 61.89 | 38.52 | 0.62 | 0.05 |
| BSU27710 | <i>tgt</i>   | 9.32  | 9.06  | 0.97 | 0.62 |
| BSU27720 | <i>queA</i>  | 4.41  | 5.00  | 1.13 | 0.03 |
| BSU27729 | <i>yrzS</i>  | 2.87  | 3.71  | 1.29 | 0.05 |
| BSU27730 | <i>ruvB</i>  | 1.55  | 2.61  | 1.69 | 0.03 |
| BSU27740 | <i>ruvA</i>  | 0.99  | 1.37  | 1.38 | 0.03 |
| BSU27750 | <i>bofC</i>  | 0.75  | 1.96  | 2.60 | 0.00 |
| BSU27760 | <i>csbX</i>  | 1.27  | 2.58  | 2.03 | 0.00 |
| BSU27770 | <i>yrbE</i>  | 1.71  | 1.49  | 0.87 | 0.11 |
| BSU27785 | <i>yrzF</i>  | 1.45  | 1.90  | 1.31 | 0.21 |
| BSU27820 | <i>yrbC</i>  | 0.70  | 1.19  | 1.69 | 0.01 |



|          |              |        |        |      |      |
|----------|--------------|--------|--------|------|------|
| BSU27840 | <i>safA</i>  | 0.18   | 1.20   | 6.65 | 0.00 |
| BSU27890 | <i>nadR</i>  | 1.09   | 1.69   | 1.55 | 0.00 |
| BSU27900 | <i>pheA</i>  | 2.92   | 7.57   | 2.59 | 0.00 |
| BSU27910 | <i>pheB</i>  | 3.50   | 11.34  | 3.24 | 0.00 |
| BSU27920 | <i>obgE</i>  | 3.42   | 12.81  | 3.74 | 0.00 |
| BSU27930 | <i>spo0B</i> | 2.09   | 9.01   | 4.31 | 0.00 |
| BSU27940 | <i>rpmA</i>  | 243.03 | 192.94 | 0.79 | 0.13 |
| BSU27950 | <i>ysxB</i>  | 248.22 | 230.09 | 0.93 | 0.35 |
| BSU27960 | <i>rplU</i>  | 251.17 | 223.03 | 0.89 | 0.21 |
| BSU27990 | <i>minD</i>  | 16.52  | 8.79   | 0.53 | 0.00 |
| BSU28000 | <i>minC</i>  | 13.60  | 8.69   | 0.64 | 0.00 |
| BSU28010 | <i>mreD</i>  | 11.03  | 8.27   | 0.75 | 0.01 |
| BSU28020 | <i>mreC</i>  | 11.52  | 9.20   | 0.80 | 0.00 |
| BSU28030 | <i>mreB</i>  | 6.44   | 6.55   | 1.02 | 0.83 |
| BSU28040 | <i>radC</i>  | 2.21   | 4.03   | 1.82 | 0.00 |
| BSU28050 | <i>maf</i>   | 2.33   | 4.33   | 1.86 | 0.00 |
| BSU28080 | <i>folC</i>  | 5.16   | 5.16   | 1.00 | 0.95 |
| BSU28090 | <i>valS</i>  | 5.04   | 6.56   | 1.30 | 0.02 |
| BSU28120 | <i>hemL</i>  | 11.20  | 9.09   | 0.81 | 0.21 |
| BSU28130 | <i>hemB</i>  | 6.37   | 6.32   | 0.99 | 0.97 |
| BSU28140 | <i>hemD</i>  | 5.22   | 5.14   | 0.98 | 0.93 |
| BSU28150 | <i>hemC</i>  | 5.87   | 4.96   | 0.85 | 0.31 |
| BSU28160 | <i>hemX</i>  | 8.01   | 4.76   | 0.59 | 0.01 |
| BSU28170 | <i>hemA</i>  | 16.79  | 9.75   | 0.58 | 0.02 |
| BSU28190 | <i>engB</i>  | 10.27  | 6.54   | 0.64 | 0.00 |
| BSU28200 | <i>lonA</i>  | 4.98   | 3.69   | 0.74 | 0.01 |
| BSU28220 | <i>clpX</i>  | 27.25  | 27.97  | 1.03 | 0.73 |
| BSU28230 | <i>tig</i>   | 47.01  | 58.05  | 1.23 | 0.02 |
| BSU28280 | <i>leuA</i>  | 1.11   | 0.59   | 0.53 | 0.02 |
| BSU28290 | <i>ilvC</i>  | 1.41   | 0.43   | 0.30 | 0.00 |
| BSU28300 | <i>ilvH</i>  | 1.17   | 0.24   | 0.21 | 0.00 |
| BSU28310 | <i>ilvB</i>  | 1.01   | 0.23   | 0.23 | 0.00 |
| BSU28350 | <i>ysnB</i>  | 5.26   | 3.17   | 0.60 | 0.00 |
| BSU28360 | <i>ysnA</i>  | 3.85   | 4.08   | 1.06 | 0.66 |
| BSU28370 | <i>rph</i>   | 2.89   | 4.57   | 1.58 | 0.01 |
| BSU28390 | <i>racE</i>  | 3.54   | 2.72   | 0.77 | 0.01 |
| BSU28400 | <i>ysmB</i>  | 2.70   | 2.58   | 0.95 | 0.45 |
| BSU28410 | <i>gerE</i>  | 12.29  | 6.45   | 0.53 | 0.03 |
| BSU28420 | <i>ysmA</i>  | 2.65   | 2.58   | 0.97 | 0.72 |
| BSU28430 | <i>sdhB</i>  | 50.98  | 25.86  | 0.51 | 0.00 |
| BSU28440 | <i>sdhA</i>  | 27.95  | 20.94  | 0.75 | 0.03 |
| BSU28450 | <i>sdhC</i>  | 18.65  | 15.80  | 0.85 | 0.07 |
| BSU28460 | <i>yslB</i>  | 22.98  | 6.90   | 0.30 | 0.00 |
| BSU28490 | <i>uvrC</i>  | 1.04   | 1.07   | 1.03 | 0.70 |
| BSU28500 | <i>trxA</i>  | 43.91  | 20.37  | 0.46 | 0.00 |
| BSU28520 | <i>etfA</i>  | 3.41   | 2.66   | 0.78 | 0.04 |
| BSU28530 | <i>etfB</i>  | 3.34   | 3.13   | 0.94 | 0.36 |
| BSU28540 | <i>ysiB</i>  | 2.63   | 2.84   | 1.08 | 0.52 |
| BSU28550 | <i>fadR</i>  | 2.27   | 2.19   | 0.96 | 0.67 |
| BSU28560 | <i>lcfA</i>  | 0.98   | 2.36   | 2.41 | 0.00 |

|          |              |        |        |      |      |
|----------|--------------|--------|--------|------|------|
| BSU28570 | <i>yshE</i>  | 4.19   | 3.74   | 0.89 | 0.29 |
| BSU28580 | <i>mutSB</i> | 3.17   | 3.31   | 1.04 | 0.68 |
| BSU28590 | <i>yshC</i>  | 1.82   | 2.33   | 1.28 | 0.11 |
| BSU28600 | <i>yshB</i>  | 1.45   | 2.00   | 1.37 | 0.18 |
| BSU28610 | <i>yshA</i>  | 1.43   | 3.58   | 2.51 | 0.01 |
| BSU28620 | <i>rnhC</i>  | 0.91   | 1.85   | 2.03 | 0.00 |
| BSU28630 | <i>pheT</i>  | 6.62   | 7.19   | 1.09 | 0.46 |
| BSU28640 | <i>pheS</i>  | 1.81   | 3.45   | 1.91 | 0.00 |
| BSU28650 | <i>ysgA</i>  | 1.16   | 1.30   | 1.12 | 0.39 |
| BSU28700 | <i>ysfE</i>  | 3.85   | 1.61   | 0.42 | 0.00 |
| BSU28710 | <i>cstA</i>  | 1.51   | 1.04   | 0.69 | 0.03 |
| BSU28820 | <i>ysdC</i>  | 11.32  | 7.26   | 0.64 | 0.01 |
| BSU28830 | <i>ysdB</i>  | 10.07  | 5.71   | 0.57 | 0.02 |
| BSU28840 | <i>ysdA</i>  | 2.68   | 4.53   | 1.69 | 0.01 |
| BSU28850 | <i>rplT</i>  | 163.38 | 148.16 | 0.91 | 0.45 |
| BSU28860 | <i>rpml</i>  | 141.73 | 166.11 | 1.17 | 0.08 |
| BSU28870 | <i>infC</i>  | 81.03  | 113.54 | 1.40 | 0.01 |
| BSU28900 | <i>ysbB</i>  | 63.18  | 16.58  | 0.26 | 0.00 |
| BSU28910 | <i>ysbA</i>  | 46.83  | 14.11  | 0.30 | 0.01 |
| BSU28920 | <i>lytT</i>  | 1.89   | 1.19   | 0.63 | 0.01 |
| BSU28940 | <i>ysaA</i>  | 4.72   | 1.39   | 0.29 | 0.00 |
| BSU28950 | <i>thrS</i>  | 9.93   | 6.96   | 0.70 | 0.03 |
| BSU28960 | <i>ytxC</i>  | 2.49   | 1.79   | 0.72 | 0.00 |
| BSU28970 | <i>ytxB</i>  | 2.57   | 2.01   | 0.78 | 0.02 |
| BSU28980 | <i>dnal</i>  | 1.61   | 1.15   | 0.71 | 0.00 |
| BSU29000 | <i>nrdR</i>  | 1.59   | 1.00   | 0.63 | 0.00 |
| BSU29010 | <i>speD</i>  | 14.89  | 24.06  | 1.62 | 0.04 |
| BSU29060 | <i>coaE</i>  | 4.64   | 3.57   | 0.77 | 0.00 |
| BSU29070 | <i>ytaF</i>  | 4.07   | 3.61   | 0.89 | 0.04 |
| BSU29080 | <i>mutM</i>  | 4.07   | 3.41   | 0.84 | 0.02 |
| BSU29090 | <i>polA</i>  | 1.83   | 1.95   | 1.07 | 0.11 |
| BSU29100 | <i>phoR</i>  | 2.01   | 1.05   | 0.52 | 0.00 |
| BSU29110 | <i>phoP</i>  | 1.08   | 0.61   | 0.56 | 0.00 |
| BSU29120 | <i>mdh</i>   | 39.51  | 17.61  | 0.45 | 0.00 |
| BSU29130 | <i>icd</i>   | 33.11  | 17.41  | 0.53 | 0.00 |
| BSU29140 | <i>citZ</i>  | 9.76   | 10.72  | 1.10 | 0.17 |
| BSU29150 | <i>ytwI</i>  | 1.16   | 2.19   | 1.89 | 0.01 |
| BSU29160 | <i>ytvI</i>  | 1.68   | 2.61   | 1.56 | 0.00 |
| BSU29170 | <i>fxsA</i>  | 13.76  | 13.00  | 0.94 | 0.56 |
| BSU29180 | <i>pyk</i>   | 33.99  | 30.26  | 0.89 | 0.28 |
| BSU29190 | <i>pfkA</i>  | 11.59  | 21.26  | 1.83 | 0.00 |
| BSU29200 | <i>accA</i>  | 13.00  | 10.23  | 0.79 | 0.01 |
| BSU29210 | <i>accD</i>  | 12.16  | 9.24   | 0.76 | 0.01 |
| BSU29220 | <i>ytsJ</i>  | 11.64  | 10.73  | 0.92 | 0.48 |
| BSU29230 | <i>dnaE</i>  | 3.71   | 4.40   | 1.18 | 0.02 |
| BSU29249 | <i>ytzJ</i>  | 1.78   | 3.19   | 1.79 | 0.05 |
| BSU29250 | <i>nrrA</i>  | 3.91   | 2.44   | 0.62 | 0.00 |
| BSU29260 | <i>ytpl</i>  | 1.73   | 1.43   | 0.82 | 0.03 |
| BSU29270 | <i>ytoi</i>  | 1.05   | 0.77   | 0.73 | 0.01 |
| BSU29410 | <i>ytkL</i>  | 8.84   | 5.49   | 0.62 | 0.01 |

|          |              |        |        |      |      |
|----------|--------------|--------|--------|------|------|
| BSU29420 | <i>fabG</i>  | 2.98   | 3.00   | 1.01 | 0.97 |
| BSU29460 | <i>moaB</i>  | 1.96   | 1.08   | 0.55 | 0.01 |
| BSU29470 | <i>ackA</i>  | 23.23  | 10.41  | 0.45 | 0.00 |
| BSU29480 | <i>ytxK</i>  | 15.96  | 7.46   | 0.47 | 0.00 |
| BSU29490 | <i>tpx</i>   | 83.52  | 19.58  | 0.23 | 0.00 |
| BSU29520 | <i>yteJ</i>  | 24.18  | 13.44  | 0.56 | 0.00 |
| BSU29530 | <i>sppA</i>  | 21.44  | 13.22  | 0.62 | 0.00 |
| BSU29540 | <i>ppnKB</i> | 4.33   | 1.18   | 0.27 | 0.00 |
| BSU29550 | <i>ytcJ</i>  | 6.24   | 5.71   | 0.92 | 0.56 |
| BSU29560 | <i>ytcI</i>  | 2.68   | 4.04   | 1.51 | 0.00 |
| BSU29570 | <i>sspA</i>  | 9.86   | 12.16  | 1.23 | 0.38 |
| BSU29580 | <i>ytbJ</i>  | 2.25   | 2.09   | 0.93 | 0.15 |
| BSU29590 | <i>iscS</i>  | 0.85   | 1.37   | 1.61 | 0.00 |
| BSU29600 | <i>braB</i>  | 1.01   | 1.20   | 1.19 | 0.05 |
| BSU29610 | <i>ezrA</i>  | 4.99   | 4.10   | 0.82 | 0.09 |
| BSU29620 | <i>hisJ</i>  | 1.02   | 0.98   | 0.96 | 0.68 |
| BSU29630 | <i>yttP</i>  | 1.81   | 2.13   | 1.18 | 0.13 |
| BSU29640 | <i>ytsP</i>  | 4.10   | 3.86   | 0.94 | 0.57 |
| BSU29650 | <i>ytrP</i>  | 1.96   | 1.22   | 0.62 | 0.00 |
| BSU29660 | <i>rpsD</i>  | 157.30 | 180.34 | 1.15 | 0.24 |
| BSU29670 | <i>tyrS</i>  | 3.82   | 2.20   | 0.58 | 0.00 |
| BSU29679 | <i>ytzK</i>  | 5.05   | 9.24   | 1.83 | 0.06 |
| BSU29680 | <i>acsA</i>  | 1.27   | 0.56   | 0.44 | 0.00 |
| BSU29720 | <i>ytxE</i>  | 1.14   | 0.80   | 0.70 | 0.03 |
| BSU29740 | <i>ccpA</i>  | 3.49   | 3.33   | 0.95 | 0.55 |
| BSU29750 | <i>aroA</i>  | 7.75   | 2.54   | 0.33 | 0.00 |
| BSU29760 | <i>ytxJ</i>  | 23.81  | 33.94  | 1.43 | 0.02 |
| BSU29770 | <i>ytxH</i>  | 28.41  | 43.89  | 1.54 | 0.00 |
| BSU29780 | <i>ytxG</i>  | 24.72  | 35.29  | 1.43 | 0.08 |
| BSU29790 | <i>murC</i>  | 10.57  | 8.46   | 0.80 | 0.01 |
| BSU29805 | <i>ytpS</i>  | 2.83   | 2.94   | 1.04 | 0.62 |
| BSU29820 | <i>ytpR</i>  | 19.82  | 10.92  | 0.55 | 0.00 |
| BSU29830 | <i>ytpQ</i>  | 7.59   | 5.84   | 0.77 | 0.01 |
| BSU29840 | <i>ytpP</i>  | 4.44   | 4.09   | 0.92 | 0.40 |
| BSU29850 | <i>ytoQ</i>  | 3.46   | 3.85   | 1.11 | 0.17 |
| BSU29860 | <i>ytoP</i>  | 2.30   | 2.63   | 1.15 | 0.14 |
| BSU29870 | <i>ytzB</i>  | 4.26   | 2.44   | 0.57 | 0.03 |
| BSU29880 | <i>malS</i>  | 3.48   | 3.51   | 1.01 | 0.93 |
| BSU29890 | <i>ytnP</i>  | 2.81   | 4.10   | 1.46 | 0.04 |
| BSU29900 | <i>trmB</i>  | 3.17   | 2.74   | 0.86 | 0.14 |
| BSU29910 | <i>ytzH</i>  | 2.69   | 3.87   | 1.44 | 0.02 |
| BSU29920 | <i>ytmP</i>  | 2.14   | 2.60   | 1.22 | 0.13 |
| BSU29940 | <i>ytlR</i>  | 1.54   | 1.17   | 0.76 | 0.02 |
| BSU29950 | <i>ytlQ</i>  | 1.86   | 1.18   | 0.63 | 0.01 |
| BSU29960 | <i>ytlP</i>  | 1.18   | 1.56   | 1.32 | 0.00 |
| BSU29970 | <i>ytkP</i>  | 3.31   | 2.16   | 0.65 | 0.00 |
| BSU29980 | <i>ytjP</i>  | 3.75   | 3.15   | 0.84 | 0.15 |
| BSU29990 | <i>pbuO</i>  | 1.76   | 2.46   | 1.40 | 0.02 |
| BSU30000 | <i>ythQ</i>  | 8.62   | 5.16   | 0.60 | 0.00 |
| BSU30010 | <i>ythP</i>  | 12.51  | 6.50   | 0.52 | 0.00 |

|          |              |       |       |      |      |
|----------|--------------|-------|-------|------|------|
| BSU30020 | <i>ytzE</i>  | 3.43  | 2.96  | 0.86 | 0.48 |
| BSU30035 | <i>ytzG</i>  | 1.37  | 1.47  | 1.07 | 0.20 |
| BSU30050 | <i>ytgP</i>  | 2.24  | 2.93  | 1.31 | 0.00 |
| BSU30060 | <i>ytfP</i>  | 1.51  | 1.59  | 1.05 | 0.28 |
| BSU30070 | <i>opuD</i>  | 2.64  | 2.49  | 0.94 | 0.22 |
| BSU30310 | <i>ytwF</i>  | 8.76  | 4.78  | 0.55 | 0.01 |
| BSU30320 | <i>leuS</i>  | 12.75 | 13.71 | 1.08 | 0.56 |
| BSU30410 | <i>ytrF</i>  | 1.73  | 2.98  | 1.72 | 0.00 |
| BSU30420 | <i>ytrE</i>  | 1.34  | 2.85  | 2.12 | 0.00 |
| BSU30430 | <i>ytrD</i>  | 0.96  | 1.89  | 1.96 | 0.00 |
| BSU30440 | <i>ytrC</i>  | 0.69  | 1.43  | 2.06 | 0.01 |
| BSU30450 | <i>ytrB</i>  | 0.42  | 1.11  | 2.65 | 0.00 |
| BSU30470 | <i>ytzC</i>  | 2.40  | 1.22  | 0.51 | 0.01 |
| BSU30480 | <i>ytqA</i>  | 0.91  | 1.48  | 1.63 | 0.01 |
| BSU30490 | <i>ytqB</i>  | 2.05  | 2.55  | 1.25 | 0.08 |
| BSU30500 | <i>ytpB</i>  | 5.73  | 7.92  | 1.38 | 0.00 |
| BSU30510 | <i>ytpA</i>  | 4.75  | 8.71  | 1.84 | 0.00 |
| BSU30520 | <i>ytoA</i>  | 4.41  | 7.70  | 1.75 | 0.01 |
| BSU30530 | <i>ytnA</i>  | 5.47  | 4.76  | 0.87 | 0.17 |
| BSU30540 | <i>asnB</i>  | 19.77 | 14.04 | 0.71 | 0.00 |
| BSU30550 | <i>metK</i>  | 8.43  | 14.13 | 1.68 | 0.00 |
| BSU30560 | <i>pckA</i>  | 1.05  | 0.41  | 0.39 | 0.01 |
| BSU30570 | <i>ytmB</i>  | 2.28  | 0.98  | 0.43 | 0.01 |
| BSU30630 | <i>ytkD</i>  | 2.03  | 1.27  | 0.63 | 0.01 |
| BSU30650 | <i>dps</i>   | 58.16 | 62.17 | 1.07 | 0.35 |
| BSU30659 | <i>ytzI</i>  | 4.24  | 3.02  | 0.71 | 0.00 |
| BSU30660 | <i>ytkA</i>  | 2.79  | 2.26  | 0.81 | 0.01 |
| BSU30670 | <i>luxS</i>  | 6.94  | 2.98  | 0.43 | 0.00 |
| BSU30680 | <i>ytjA</i>  | 3.84  | 2.82  | 0.73 | 0.04 |
| BSU30690 | <i>ytiB</i>  | 2.57  | 1.93  | 0.75 | 0.02 |
| BSU30700 | <i>rpmE2</i> | 2.43  | 2.38  | 0.98 | 0.92 |
| BSU30740 | <i>mntD</i>  | 11.62 | 0.84  | 0.07 | 0.01 |
| BSU30750 | <i>mntC</i>  | 10.37 | 0.82  | 0.08 | 0.01 |
| BSU30760 | <i>mntB</i>  | 8.81  | 0.91  | 0.10 | 0.01 |
| BSU30770 | <i>mntA</i>  | 6.64  | 1.66  | 0.25 | 0.00 |
| BSU30780 | <i>menC</i>  | 3.52  | 2.98  | 0.85 | 0.12 |
| BSU30790 | <i>menE</i>  | 2.86  | 2.71  | 0.95 | 0.66 |
| BSU30800 | <i>menB</i>  | 29.68 | 24.13 | 0.81 | 0.11 |
| BSU30810 | <i>ytXM</i>  | 8.12  | 8.62  | 1.06 | 0.55 |
| BSU30820 | <i>menD</i>  | 5.97  | 6.41  | 1.07 | 0.63 |
| BSU30830 | <i>menF</i>  | 3.71  | 5.79  | 1.56 | 0.00 |
| BSU30930 | <i>ytaB</i>  | 1.54  | 2.24  | 1.46 | 0.02 |
| BSU30990 | <i>thiT</i>  | 1.34  | 3.95  | 2.94 | 0.00 |
| BSU31000 | <i>yuaI</i>  | 5.75  | 4.16  | 0.72 | 0.00 |
| BSU31010 | <i>yuaG</i>  | 6.33  | 5.61  | 0.89 | 0.28 |
| BSU31020 | <i>yuaF</i>  | 14.50 | 11.11 | 0.77 | 0.03 |
| BSU31030 | <i>yuaE</i>  | 7.74  | 3.85  | 0.50 | 0.01 |
| BSU31040 | <i>yuaD</i>  | 1.20  | 0.80  | 0.67 | 0.00 |
| BSU31080 | <i>yuaB</i>  | 3.00  | 0.94  | 0.32 | 0.00 |
| BSU31110 | <i>yubF</i>  | 16.82 | 5.18  | 0.31 | 0.00 |

|          |             |       |       |      |      |
|----------|-------------|-------|-------|------|------|
| BSU31150 | <i>yubB</i> | 4.56  | 1.85  | 0.41 | 0.00 |
| BSU31160 | <i>yubA</i> | 2.27  | 1.99  | 0.87 | 0.34 |
| BSU31170 | <i>yulF</i> | 2.31  | 2.02  | 0.87 | 0.04 |
| BSU31210 | <i>yulB</i> | 0.76  | 1.18  | 1.55 | 0.01 |
| BSU31240 | <i>mcpA</i> | 3.32  | 0.35  | 0.10 | 0.00 |
| BSU31260 | <i>mcpB</i> | 1.60  | 0.30  | 0.19 | 0.00 |
| BSU31279 | <i>yuzH</i> | 2.03  | 1.38  | 0.68 | 0.02 |
| BSU31280 | <i>yugU</i> | 2.00  | 1.44  | 0.72 | 0.02 |
| BSU31310 | <i>yugP</i> | 3.19  | 1.72  | 0.54 | 0.00 |
| BSU31330 | <i>yugN</i> | 1.62  | 0.89  | 0.55 | 0.00 |
| BSU31340 | <i>yugM</i> | 1.65  | 1.94  | 1.18 | 0.27 |
| BSU31350 | <i>pgi</i>  | 50.02 | 11.39 | 0.23 | 0.00 |
| BSU31360 | <i>yugK</i> | 3.05  | 3.34  | 1.10 | 0.04 |
| BSU31370 | <i>yugJ</i> | 16.61 | 13.53 | 0.81 | 0.05 |
| BSU31380 | <i>yuzA</i> | 1.18  | 1.30  | 1.10 | 0.21 |
| BSU31390 | <i>yugI</i> | 49.32 | 18.13 | 0.37 | 0.01 |
| BSU31400 | <i>alaT</i> | 5.52  | 3.70  | 0.67 | 0.00 |
| BSU31410 | <i>yugG</i> | 4.34  | 3.13  | 0.72 | 0.04 |
| BSU31430 | <i>yugE</i> | 1.56  | 1.20  | 0.77 | 0.03 |
| BSU31440 | <i>patB</i> | 6.13  | 3.04  | 0.50 | 0.00 |
| BSU31460 | <i>kapB</i> | 5.11  | 3.32  | 0.65 | 0.00 |
| BSU31490 | <i>pbpD</i> | 2.25  | 1.74  | 0.77 | 0.01 |
| BSU31500 | <i>yuxK</i> | 5.82  | 2.88  | 0.50 | 0.00 |
| BSU31510 | <i>yufK</i> | 3.67  | 3.54  | 0.96 | 0.82 |
| BSU31530 | <i>yufM</i> | 2.60  | 1.21  | 0.47 | 0.00 |
| BSU31580 | <i>maeN</i> | 4.92  | 4.58  | 0.93 | 0.57 |
| BSU31600 | <i>mrpA</i> | 3.11  | 4.69  | 1.51 | 0.00 |
| BSU31610 | <i>mrpB</i> | 4.06  | 4.99  | 1.23 | 0.04 |
| BSU31620 | <i>mrpC</i> | 3.66  | 4.97  | 1.36 | 0.04 |
| BSU31630 | <i>mrpD</i> | 3.23  | 4.43  | 1.37 | 0.03 |
| BSU31640 | <i>mrpE</i> | 5.30  | 5.71  | 1.08 | 0.57 |
| BSU31650 | <i>mrpF</i> | 5.96  | 7.13  | 1.20 | 0.16 |
| BSU31660 | <i>mrpG</i> | 4.99  | 5.39  | 1.08 | 0.24 |
| BSU31670 | <i>yuxO</i> | 4.62  | 6.25  | 1.35 | 0.02 |
| BSU31680 | <i>comA</i> | 3.79  | 7.97  | 2.10 | 0.00 |
| BSU31690 | <i>comP</i> | 3.29  | 2.17  | 0.66 | 0.12 |
| BSU31700 | <i>comX</i> | 5.12  | 2.30  | 0.45 | 0.18 |
| BSU31710 | <i>comQ</i> | 2.28  | 2.96  | 1.30 | 0.48 |
| BSU31730 | <i>yuzC</i> | 5.93  | 2.78  | 0.47 | 0.00 |
| BSU31740 | <i>yuxH</i> | 4.58  | 3.03  | 0.66 | 0.02 |
| BSU31750 | <i>yueK</i> | 8.01  | 4.75  | 0.59 | 0.00 |
| BSU31760 | <i>pncA</i> | 6.50  | 5.51  | 0.85 | 0.02 |
| BSU31770 | <i>yuel</i> | 3.53  | 4.27  | 1.21 | 0.01 |
| BSU31780 | <i>yueH</i> | 3.64  | 5.13  | 1.41 | 0.00 |
| BSU31790 | <i>yueG</i> | 4.64  | 4.32  | 0.93 | 0.68 |
| BSU31800 | <i>yueF</i> | 2.43  | 2.20  | 0.91 | 0.18 |
| BSU31820 | <i>yuzF</i> | 0.85  | 1.10  | 1.29 | 0.02 |
| BSU31830 | <i>yueE</i> | 1.08  | 1.84  | 1.70 | 0.01 |
| BSU31840 | <i>yueD</i> | 8.52  | 5.69  | 0.67 | 0.01 |
| BSU31850 | <i>yueC</i> | 3.63  | 3.49  | 0.96 | 0.66 |

|          |              |        |       |      |      |
|----------|--------------|--------|-------|------|------|
| BSU31860 | <i>yueB</i>  | 3.79   | 3.53  | 0.93 | 0.16 |
| BSU31875 | <i>yukB</i>  | 2.51   | 1.88  | 0.75 | 0.05 |
| BSU31890 | <i>yukC</i>  | 1.58   | 1.35  | 0.85 | 0.23 |
| BSU31900 | <i>yukD</i>  | 2.13   | 2.53  | 1.19 | 0.18 |
| BSU31910 | <i>yukE</i>  | 124.11 | 37.19 | 0.30 | 0.00 |
| BSU31930 | <i>ald</i>   | 25.23  | 5.72  | 0.23 | 0.00 |
| BSU31945 | <i>yukJ</i>  | 7.34   | 1.11  | 0.15 | 0.00 |
| BSU31959 | <i>ybdZ</i>  | 25.51  | 1.59  | 0.06 | 0.00 |
| BSU31960 | <i>dhbF</i>  | 19.60  | 2.17  | 0.11 | 0.01 |
| BSU31970 | <i>dhbB</i>  | 29.32  | 3.74  | 0.13 | 0.00 |
| BSU31980 | <i>dhbE</i>  | 25.72  | 3.30  | 0.13 | 0.00 |
| BSU31990 | <i>dhbC</i>  | 24.89  | 3.28  | 0.13 | 0.00 |
| BSU32000 | <i>dhbA</i>  | 18.89  | 2.56  | 0.14 | 0.00 |
| BSU32010 | <i>besA</i>  | 7.48   | 1.98  | 0.27 | 0.00 |
| BSU32030 | <i>bioYB</i> | 0.77   | 1.17  | 1.53 | 0.02 |
| BSU32050 | <i>yuiE</i>  | 3.83   | 2.18  | 0.57 | 0.01 |
| BSU32060 | <i>yuiD</i>  | 1.95   | 1.19  | 0.61 | 0.00 |
| BSU32080 | <i>yuiB</i>  | 1.80   | 2.24  | 1.24 | 0.29 |
| BSU32110 | <i>yumC</i>  | 10.38  | 9.99  | 0.96 | 0.65 |
| BSU32130 | <i>guaC</i>  | 3.09   | 1.35  | 0.44 | 0.00 |
| BSU32160 | <i>yutM</i>  | 10.97  | 6.85  | 0.62 | 0.01 |
| BSU32170 | <i>dapF</i>  | 1.71   | 1.00  | 0.59 | 0.00 |
| BSU32180 | <i>yutK</i>  | 0.80   | 1.28  | 1.60 | 0.01 |
| BSU32190 | <i>yuzB</i>  | 4.23   | 1.79  | 0.42 | 0.02 |
| BSU32200 | <i>yutJ</i>  | 2.31   | 0.99  | 0.43 | 0.00 |
| BSU32220 | <i>yutI</i>  | 34.90  | 15.30 | 0.44 | 0.02 |
| BSU32230 | <i>yuxL</i>  | 1.32   | 0.49  | 0.37 | 0.00 |
| BSU32240 | <i>thrB</i>  | 3.39   | 1.32  | 0.39 | 0.02 |
| BSU32250 | <i>thrC</i>  | 3.53   | 1.40  | 0.40 | 0.01 |
| BSU32260 | <i>hom</i>   | 2.20   | 0.95  | 0.43 | 0.00 |
| BSU32290 | <i>yutF</i>  | 6.87   | 3.89  | 0.57 | 0.00 |
| BSU32300 | <i>yutE</i>  | 5.91   | 3.52  | 0.60 | 0.00 |
| BSU32310 | <i>yutD</i>  | 4.55   | 3.22  | 0.71 | 0.06 |
| BSU32330 | <i>lipA</i>  | 7.70   | 2.41  | 0.31 | 0.01 |
| BSU32350 | <i>yunB</i>  | 0.91   | 1.18  | 1.29 | 0.00 |
| BSU32360 | <i>yunC</i>  | 5.82   | 5.23  | 0.90 | 0.44 |
| BSU32370 | <i>yunD</i>  | 4.11   | 4.30  | 1.05 | 0.73 |
| BSU32380 | <i>yunE</i>  | 2.58   | 3.40  | 1.32 | 0.02 |
| BSU32390 | <i>yunF</i>  | 1.91   | 2.91  | 1.53 | 0.00 |
| BSU32400 | <i>yunG</i>  | 0.71   | 1.15  | 1.61 | 0.00 |
| BSU32560 | <i>friR</i>  | 1.49   | 1.64  | 1.10 | 0.14 |
| BSU32620 | <i>yurQ</i>  | 4.05   | 4.30  | 1.06 | 0.28 |
| BSU32630 | <i>yurR</i>  | 1.63   | 2.93  | 1.80 | 0.03 |
| BSU32640 | <i>sspG</i>  | 4.11   | 3.08  | 0.75 | 0.19 |
| BSU32650 | <i>yurS</i>  | 4.13   | 2.09  | 0.51 | 0.00 |
| BSU32660 | <i>yurT</i>  | 2.94   | 5.10  | 1.73 | 0.01 |
| BSU32669 | <i>yuzN</i>  | 2.12   | 5.27  | 2.48 | 0.00 |
| BSU32670 | <i>sufB</i>  | 74.88  | 36.83 | 0.49 | 0.00 |
| BSU32680 | <i>iscU</i>  | 57.08  | 32.23 | 0.56 | 0.00 |
| BSU32690 | <i>sufS</i>  | 47.57  | 30.10 | 0.63 | 0.04 |

|          |             |        |        |      |      |
|----------|-------------|--------|--------|------|------|
| BSU32700 | <i>sufD</i> | 43.31  | 26.80  | 0.62 | 0.05 |
| BSU32710 | <i>sufC</i> | 30.65  | 18.26  | 0.60 | 0.01 |
| BSU32719 | <i>yuzK</i> | 2.02   | 0.61   | 0.30 | 0.03 |
| BSU32730 | <i>metN</i> | 13.05  | 7.20   | 0.55 | 0.01 |
| BSU32740 | <i>metP</i> | 5.90   | 5.45   | 0.92 | 0.31 |
| BSU32750 | <i>metQ</i> | 3.42   | 3.87   | 1.13 | 0.09 |
| BSU32770 | <i>yusE</i> | 0.75   | 2.21   | 2.96 | 0.00 |
| BSU32780 | <i>yusF</i> | 1.55   | 6.31   | 4.08 | 0.00 |
| BSU32790 | <i>yusG</i> | 47.21  | 12.98  | 0.27 | 0.00 |
| BSU32800 | <i>yusH</i> | 68.99  | 21.22  | 0.31 | 0.00 |
| BSU32810 | <i>yusI</i> | 14.27  | 7.23   | 0.51 | 0.02 |
| BSU32870 | <i>yusO</i> | 1.01   | 2.13   | 2.12 | 0.00 |
| BSU32880 | <i>yusP</i> | 1.62   | 2.93   | 1.81 | 0.00 |
| BSU32930 | <i>yusU</i> | 2.49   | 1.94   | 0.78 | 0.09 |
| BSU32940 | <i>yusV</i> | 6.77   | 5.13   | 0.76 | 0.11 |
| BSU32990 | <i>mrgA</i> | 192.39 | 102.94 | 0.54 | 0.09 |
| BSU33000 | <i>htrB</i> | 1.22   | 2.09   | 1.71 | 0.01 |
| BSU33010 | <i>cssR</i> | 1.73   | 1.23   | 0.71 | 0.03 |
| BSU33020 | <i>cssS</i> | 2.64   | 2.42   | 0.92 | 0.36 |
| BSU33029 | <i>yuzO</i> | 1.91   | 9.29   | 4.87 | 0.01 |
| BSU33030 | <i>yuxN</i> | 1.71   | 1.88   | 1.10 | 0.36 |
| BSU33040 | <i>fumC</i> | 42.26  | 8.64   | 0.20 | 0.00 |
| BSU33049 | <i>yvzF</i> | 5.51   | 4.11   | 0.75 | 0.28 |
| BSU33080 | <i>liaR</i> | 1.07   | 1.82   | 1.70 | 0.00 |
| BSU33090 | <i>liaS</i> | 1.06   | 1.52   | 1.44 | 0.09 |
| BSU33100 | <i>liaF</i> | 0.78   | 1.14   | 1.46 | 0.00 |
| BSU33110 | <i>liaG</i> | 0.79   | 1.28   | 1.62 | 0.01 |
| BSU33120 | <i>liaH</i> | 1.11   | 1.02   | 0.91 | 0.53 |
| BSU33130 | <i>liaI</i> | 1.16   | 1.09   | 0.93 | 0.61 |
| BSU33150 | <i>yvqK</i> | 1.35   | 1.46   | 1.08 | 0.52 |
| BSU33160 | <i>yvrA</i> | 1.07   | 1.37   | 1.29 | 0.10 |
| BSU33170 | <i>yvrB</i> | 1.56   | 1.50   | 0.96 | 0.80 |
| BSU33180 | <i>yvrC</i> | 2.87   | 2.84   | 0.99 | 0.84 |
| BSU33190 | <i>yvrD</i> | 4.37   | 2.39   | 0.55 | 0.00 |
| BSU33200 | <i>yvrE</i> | 4.61   | 4.80   | 1.04 | 0.67 |
| BSU33210 | <i>yvrG</i> | 1.24   | 1.06   | 0.85 | 0.10 |
| BSU33240 | <i>oxdC</i> | 1.02   | 0.15   | 0.15 | 0.00 |
| BSU33260 | <i>yvrN</i> | 2.35   | 1.00   | 0.42 | 0.00 |
| BSU33270 | <i>yvrO</i> | 1.27   | 0.68   | 0.53 | 0.01 |
| BSU33290 | <i>fhuC</i> | 8.00   | 5.11   | 0.64 | 0.00 |
| BSU33300 | <i>fhuG</i> | 3.68   | 3.54   | 0.96 | 0.61 |
| BSU33310 | <i>fhuB</i> | 1.47   | 2.38   | 1.62 | 0.08 |
| BSU33320 | <i>fhuD</i> | 11.76  | 6.08   | 0.52 | 0.01 |
| BSU33350 | <i>yvsG</i> | 0.27   | 1.17   | 4.27 | 0.00 |
| BSU33370 | <i>yvgK</i> | 4.32   | 2.97   | 0.69 | 0.00 |
| BSU33380 | <i>yvgL</i> | 1.29   | 0.94   | 0.73 | 0.00 |
| BSU33390 | <i>yvgM</i> | 1.33   | 1.14   | 0.86 | 0.17 |
| BSU33400 | <i>yvgN</i> | 57.05  | 17.18  | 0.30 | 0.00 |
| BSU33420 | <i>nhaK</i> | 2.76   | 2.65   | 0.96 | 0.71 |
| BSU33430 | <i>yvgQ</i> | 1.35   | 0.83   | 0.61 | 0.05 |

|          |              |        |        |      |      |
|----------|--------------|--------|--------|------|------|
| BSU33460 | <i>yvgT</i>  | 0.84   | 1.02   | 1.21 | 0.34 |
| BSU33470 | <i>bdbC</i>  | 11.87  | 6.10   | 0.51 | 0.00 |
| BSU33480 | <i>bdbD</i>  | 10.97  | 7.87   | 0.72 | 0.00 |
| BSU33490 | <i>copB</i>  | 11.02  | 1.21   | 0.11 | 0.01 |
| BSU33500 | <i>copA</i>  | 1.23   | 1.06   | 0.87 | 0.30 |
| BSU33510 | <i>copZ</i>  | 3.27   | 1.70   | 0.52 | 0.00 |
| BSU33520 | <i>csoR</i>  | 1.60   | 1.94   | 1.21 | 0.23 |
| BSU33530 | <i>yvaA</i>  | 16.47  | 13.05  | 0.79 | 0.06 |
| BSU33540 | <i>yvaB</i>  | 1.30   | 1.20   | 0.92 | 0.21 |
| BSU33590 | <i>yvaG</i>  | 1.06   | 0.56   | 0.52 | 0.00 |
| BSU33600 | <i>smpB</i>  | 3.36   | 9.80   | 2.91 | 0.00 |
| BSU33610 | <i>rnr</i>   | 5.34   | 7.52   | 1.41 | 0.05 |
| BSU33620 | <i>yvaK</i>  | 3.09   | 4.54   | 1.47 | 0.01 |
| BSU33630 | <i>secG</i>  | 32.86  | 17.81  | 0.54 | 0.09 |
| BSU33660 | <i>rghRA</i> | 0.69   | 1.07   | 1.56 | 0.00 |
| BSU33670 | <i>rghRB</i> | 0.55   | 1.29   | 2.34 | 0.01 |
| BSU33680 | <i>yvaP</i>  | 6.44   | 4.09   | 0.64 | 0.00 |
| BSU33700 | <i>opuBD</i> | 0.59   | 1.78   | 3.02 | 0.01 |
| BSU33710 | <i>opuBC</i> | 0.65   | 1.78   | 2.72 | 0.00 |
| BSU33740 | <i>yvaV</i>  | 0.77   | 1.39   | 1.79 | 0.00 |
| BSU33780 | <i>sdpl</i>  | 1.51   | 0.55   | 0.37 | 0.09 |
| BSU33790 | <i>sdpR</i>  | 1.16   | 0.61   | 0.52 | 0.12 |
| BSU33800 | <i>opuCD</i> | 0.21   | 1.12   | 5.43 | 0.00 |
| BSU33810 | <i>opuCC</i> | 0.17   | 1.13   | 6.78 | 0.00 |
| BSU33820 | <i>opuCB</i> | 0.15   | 1.10   | 7.55 | 0.00 |
| BSU33860 | <i>yvbH</i>  | 2.47   | 1.00   | 0.41 | 0.00 |
| BSU33870 | <i>yvbl</i>  | 1.87   | 1.24   | 0.66 | 0.09 |
| BSU33880 | <i>yvbJ</i>  | 2.27   | 0.72   | 0.32 | 0.00 |
| BSU33900 | <i>eno</i>   | 86.50  | 118.67 | 1.37 | 0.05 |
| BSU33910 | <i>pgm</i>   | 76.81  | 124.74 | 1.62 | 0.05 |
| BSU33920 | <i>tpiA</i>  | 85.15  | 131.02 | 1.54 | 0.05 |
| BSU33930 | <i>pgk</i>   | 85.93  | 138.89 | 1.62 | 0.05 |
| BSU33940 | <i>gapA</i>  | 255.97 | 199.79 | 0.78 | 0.11 |
| BSU33950 | <i>cggR</i>  | 56.49  | 212.11 | 3.75 | 0.00 |
| BSU33970 | <i>araR</i>  | 1.44   | 2.16   | 1.50 | 0.00 |
| BSU34020 | <i>yvbX</i>  | 1.24   | 0.72   | 0.58 | 0.00 |
| BSU34030 | <i>yvbY</i>  | 25.65  | 13.73  | 0.54 | 0.00 |
| BSU34040 | <i>yvfW</i>  | 13.40  | 9.01   | 0.67 | 0.04 |
| BSU34050 | <i>yvfV</i>  | 6.33   | 5.05   | 0.80 | 0.15 |
| BSU34110 | <i>rsbP</i>  | 1.04   | 0.70   | 0.67 | 0.00 |
| BSU34180 | <i>yvfl</i>  | 1.52   | 0.86   | 0.57 | 0.00 |
| BSU34190 | <i>yvfH</i>  | 1.86   | 1.69   | 0.90 | 0.39 |
| BSU34200 | <i>sigL</i>  | 4.27   | 4.24   | 0.99 | 0.90 |
| BSU34210 | <i>yvfG</i>  | 11.48  | 6.25   | 0.54 | 0.01 |
| BSU34430 | <i>racX</i>  | 3.67   | 1.09   | 0.30 | 0.00 |
| BSU34440 | <i>pbpE</i>  | 3.29   | 1.01   | 0.31 | 0.00 |
| BSU34480 | <i>yvdT</i>  | 3.96   | 5.11   | 1.29 | 0.28 |
| BSU34540 | <i>clpP</i>  | 117.67 | 33.12  | 0.28 | 0.00 |
| BSU34640 | <i>yvdD</i>  | 4.96   | 5.45   | 1.10 | 0.30 |
| BSU34650 | <i>yvdC</i>  | 2.46   | 0.79   | 0.32 | 0.00 |



|          |              |        |       |      |      |
|----------|--------------|--------|-------|------|------|
| BSU34680 | <i>yvcT</i>  | 7.86   | 3.08  | 0.39 | 0.00 |
| BSU34690 | <i>yvcS</i>  | 1.78   | 1.10  | 0.61 | 0.00 |
| BSU34700 | <i>yvcR</i>  | 1.68   | 1.22  | 0.73 | 0.01 |
| BSU34710 | <i>yvcQ</i>  | 1.13   | 0.90  | 0.80 | 0.03 |
| BSU34730 | <i>yvcN</i>  | 10.19  | 7.56  | 0.74 | 0.08 |
| BSU34740 | <i>crh</i>   | 13.27  | 11.29 | 0.85 | 0.07 |
| BSU34750 | <i>whiA</i>  | 8.65   | 6.88  | 0.79 | 0.08 |
| BSU34760 | <i>yvcK</i>  | 8.50   | 7.03  | 0.83 | 0.10 |
| BSU34770 | <i>yvcJ</i>  | 6.32   | 5.30  | 0.84 | 0.15 |
| BSU34780 | <i>yvcI</i>  | 3.62   | 4.14  | 1.14 | 0.12 |
| BSU34790 | <i>trxB</i>  | 6.65   | 5.65  | 0.85 | 0.16 |
| BSU34800 | <i>cwlO</i>  | 7.42   | 6.98  | 0.94 | 0.49 |
| BSU34810 | <i>yvcD</i>  | 2.05   | 1.90  | 0.92 | 0.32 |
| BSU34820 | <i>bmrA</i>  | 1.39   | 0.89  | 0.64 | 0.00 |
| BSU34960 | <i>yvoF</i>  | 9.82   | 6.06  | 0.62 | 0.01 |
| BSU34970 | <i>hprP</i>  | 9.32   | 6.64  | 0.71 | 0.02 |
| BSU34980 | <i>yvoD</i>  | 7.07   | 5.61  | 0.79 | 0.15 |
| BSU34990 | <i>lgt</i>   | 4.97   | 3.64  | 0.73 | 0.01 |
| BSU35000 | <i>hprK</i>  | 2.50   | 1.91  | 0.76 | 0.03 |
| BSU35010 | <i>nagA</i>  | 1.99   | 1.15  | 0.58 | 0.04 |
| BSU35020 | <i>nagBA</i> | 3.15   | 1.83  | 0.58 | 0.02 |
| BSU35030 | <i>yvoA</i>  | 2.55   | 1.29  | 0.51 | 0.01 |
| BSU35060 | <i>cypX</i>  | 1.03   | 0.44  | 0.43 | 0.01 |
| BSU35080 | <i>yvmB</i>  | 0.60   | 1.09  | 1.81 | 0.01 |
| BSU35090 | <i>yvmA</i>  | 1.37   | 2.17  | 1.58 | 0.00 |
| BSU35100 | <i>yvlD</i>  | 25.96  | 16.52 | 0.64 | 0.00 |
| BSU35110 | <i>yvlC</i>  | 40.49  | 25.39 | 0.63 | 0.00 |
| BSU35120 | <i>yvlB</i>  | 25.07  | 17.34 | 0.69 | 0.00 |
| BSU35130 | <i>yvlA</i>  | 19.98  | 12.32 | 0.62 | 0.00 |
| BSU35160 | <i>uvrA</i>  | 7.40   | 7.48  | 1.01 | 0.95 |
| BSU35170 | <i>uvrB</i>  | 3.80   | 4.65  | 1.22 | 0.14 |
| BSU35180 | <i>csbA</i>  | 10.68  | 13.14 | 1.23 | 0.42 |
| BSU35220 | <i>minJ</i>  | 4.09   | 1.90  | 0.46 | 0.00 |
| BSU35250 | <i>ftsX</i>  | 7.83   | 5.53  | 0.71 | 0.01 |
| BSU35260 | <i>ftsE</i>  | 3.11   | 3.34  | 1.07 | 0.15 |
| BSU35270 | <i>cccB</i>  | 10.55  | 4.85  | 0.46 | 0.00 |
| BSU35280 | <i>yvjA</i>  | 1.11   | 0.72  | 0.65 | 0.00 |
| BSU35290 | <i>prfB</i>  | 21.54  | 16.98 | 0.79 | 0.04 |
| BSU35300 | <i>secA</i>  | 14.48  | 17.41 | 1.20 | 0.17 |
| BSU35310 | <i>yvyD</i>  | 237.96 | 59.14 | 0.25 | 0.00 |
| BSU35319 | <i>yvzG</i>  | 6.18   | 0.82  | 0.13 | 0.00 |
| BSU35320 | <i>fliT</i>  | 10.35  | 1.09  | 0.11 | 0.00 |
| BSU35330 | <i>fliS</i>  | 7.45   | 0.82  | 0.11 | 0.00 |
| BSU35340 | <i>fliD</i>  | 5.27   | 0.54  | 0.10 | 0.00 |
| BSU35350 | <i>yvyC</i>  | 3.05   | 0.31  | 0.10 | 0.00 |
| BSU35360 | <i>hag</i>   | 205.50 | 11.63 | 0.06 | 0.00 |
| BSU35370 | <i>csrA</i>  | 2.22   | 0.79  | 0.36 | 0.00 |
| BSU35380 | <i>yviF</i>  | 2.16   | 0.83  | 0.38 | 0.00 |
| BSU35400 | <i>flgL</i>  | 8.95   | 1.53  | 0.17 | 0.00 |
| BSU35410 | <i>flgK</i>  | 5.07   | 0.95  | 0.19 | 0.00 |

|          |             |        |       |       |      |
|----------|-------------|--------|-------|-------|------|
| BSU35420 | <i>yvyG</i> | 3.58   | 0.66  | 0.19  | 0.00 |
| BSU35430 | <i>flgM</i> | 3.46   | 0.58  | 0.17  | 0.00 |
| BSU35440 | <i>yvyF</i> | 2.04   | 0.58  | 0.28  | 0.00 |
| BSU35480 | <i>yviA</i> | 3.78   | 2.87  | 0.76  | 0.01 |
| BSU35490 | <i>degU</i> | 7.37   | 5.63  | 0.76  | 0.00 |
| BSU35500 | <i>degS</i> | 2.51   | 2.32  | 0.92  | 0.57 |
| BSU35510 | <i>yvyE</i> | 1.78   | 3.65  | 2.05  | 0.00 |
| BSU35520 | <i>yvhJ</i> | 3.22   | 2.79  | 0.87  | 0.15 |
| BSU35530 | <i>tagO</i> | 8.30   | 8.59  | 1.04  | 0.76 |
| BSU35620 | <i>lytC</i> | 3.56   | 0.89  | 0.25  | 0.00 |
| BSU35630 | <i>lytB</i> | 1.79   | 0.86  | 0.48  | 0.00 |
| BSU35640 | <i>lytA</i> | 2.92   | 1.59  | 0.54  | 0.02 |
| BSU35650 | <i>lytR</i> | 5.72   | 2.57  | 0.45  | 0.00 |
| BSU35660 | <i>mnaA</i> | 2.15   | 1.22  | 0.57  | 0.00 |
| BSU35670 | <i>gtaB</i> | 50.78  | 45.73 | 0.90  | 0.27 |
| BSU35690 | <i>ggaA</i> | 3.17   | 1.87  | 0.59  | 0.30 |
| BSU35700 | <i>tagH</i> | 7.92   | 5.32  | 0.67  | 0.02 |
| BSU35710 | <i>tagG</i> | 3.23   | 4.25  | 1.31  | 0.27 |
| BSU35720 | <i>tagF</i> | 7.67   | 2.70  | 0.35  | 0.01 |
| BSU35730 | <i>tagE</i> | 2.40   | 1.26  | 0.53  | 0.05 |
| BSU35740 | <i>tagD</i> | 8.83   | 2.47  | 0.28  | 0.00 |
| BSU35750 | <i>tagA</i> | 3.39   | 2.40  | 0.71  | 0.10 |
| BSU35760 | <i>tagB</i> | 1.89   | 1.34  | 0.71  | 0.30 |
| BSU35780 | <i>lytD</i> | 1.35   | 0.32  | 0.23  | 0.00 |
| BSU35790 | <i>yvyl</i> | 3.29   | 5.90  | 1.79  | 0.00 |
| BSU35830 | <i>ywtG</i> | 1.38   | 1.92  | 1.39  | 0.10 |
| BSU35840 | <i>ywtF</i> | 3.04   | 1.84  | 0.60  | 0.00 |
| BSU35850 | <i>ywtE</i> | 2.88   | 1.33  | 0.46  | 0.00 |
| BSU35860 | <i>pgdS</i> | 1.10   | 0.19  | 0.17  | 0.00 |
| BSU35910 | <i>rbsR</i> | 14.06  | 14.89 | 1.06  | 0.79 |
| BSU35920 | <i>rbsK</i> | 21.05  | 17.24 | 0.82  | 0.33 |
| BSU35930 | <i>rbsD</i> | 26.17  | 19.01 | 0.73  | 0.28 |
| BSU35940 | <i>rbsA</i> | 33.17  | 13.20 | 0.40  | 0.03 |
| BSU35950 | <i>rbsC</i> | 55.20  | 13.44 | 0.24  | 0.01 |
| BSU35960 | <i>rbsB</i> | 95.97  | 15.27 | 0.16  | 0.00 |
| BSU35970 | <i>ywsB</i> | 152.05 | 23.30 | 0.15  | 0.00 |
| BSU35980 | <i>ywsA</i> | 1.24   | 0.81  | 0.65  | 0.09 |
| BSU35990 | <i>ywrO</i> | 3.20   | 2.46  | 0.77  | 0.01 |
| BSU36000 | <i>alsD</i> | 0.63   | 4.68  | 7.39  | 0.00 |
| BSU36010 | <i>alsS</i> | 0.28   | 3.30  | 11.95 | 0.00 |
| BSU36020 | <i>alsR</i> | 1.77   | 3.54  | 2.01  | 0.00 |
| BSU36070 | <i>cotG</i> | 3.70   | 0.94  | 0.25  | 0.00 |
| BSU36080 | <i>ywrF</i> | 3.09   | 0.66  | 0.21  | 0.00 |
| BSU36090 | <i>ywrE</i> | 2.18   | 1.39  | 0.64  | 0.17 |
| BSU36110 | <i>ywrC</i> | 1.46   | 1.39  | 0.95  | 0.54 |
| BSU36120 | <i>ywrB</i> | 1.91   | 2.05  | 1.07  | 0.18 |
| BSU36130 | <i>ywrA</i> | 1.98   | 2.23  | 1.12  | 0.58 |
| BSU36170 | <i>ywqL</i> | 1.32   | 1.23  | 0.94  | 0.37 |
| BSU36230 | <i>ywqF</i> | 1.06   | 1.14  | 1.08  | 0.25 |
| BSU36250 | <i>ptkA</i> | 1.35   | 0.40  | 0.30  | 0.00 |

|          |              |       |        |      |      |
|----------|--------------|-------|--------|------|------|
| BSU36269 | <i>ywzD</i>  | 2.48  | 0.92   | 0.37 | 0.01 |
| BSU36280 | <i>ywqA</i>  | 1.87  | 1.86   | 1.00 | 0.99 |
| BSU36290 | <i>ywpJ</i>  | 0.83  | 1.29   | 1.55 | 0.03 |
| BSU36330 | <i>ywpF</i>  | 3.55  | 1.62   | 0.46 | 0.00 |
| BSU36360 | <i>mscL</i>  | 1.81  | 1.92   | 1.06 | 0.46 |
| BSU36370 | <i>fabZ</i>  | 3.96  | 3.41   | 0.86 | 0.06 |
| BSU36380 | <i>rapD</i>  | 1.56  | 0.81   | 0.52 | 0.03 |
| BSU36390 | <i>flhP</i>  | 5.77  | 1.32   | 0.23 | 0.00 |
| BSU36400 | <i>flhO</i>  | 2.83  | 0.54   | 0.19 | 0.00 |
| BSU36410 | <i>mbl</i>   | 8.20  | 8.35   | 1.02 | 0.76 |
| BSU36480 | <i>ywoD</i>  | 1.04  | 0.98   | 0.94 | 0.37 |
| BSU36490 | <i>ywoC</i>  | 1.28  | 1.10   | 0.86 | 0.22 |
| BSU36510 | <i>amtB</i>  | 0.68  | 3.90   | 5.74 | 0.00 |
| BSU36520 | <i>glnK</i>  | 3.51  | 6.13   | 1.75 | 0.08 |
| BSU36530 | <i>bcrC</i>  | 3.42  | 2.06   | 0.60 | 0.02 |
| BSU36560 | <i>ywnH</i>  | 1.26  | 1.10   | 0.87 | 0.20 |
| BSU36570 | <i>ywnG</i>  | 4.69  | 2.77   | 0.59 | 0.00 |
| BSU36580 | <i>ywnF</i>  | 2.26  | 1.10   | 0.49 | 0.03 |
| BSU36590 | <i>clsA</i>  | 0.89  | 1.84   | 2.08 | 0.00 |
| BSU36610 | <i>ywnC</i>  | 4.54  | 2.13   | 0.47 | 0.01 |
| BSU36630 | <i>ywnA</i>  | 3.12  | 5.06   | 1.62 | 0.08 |
| BSU36670 | <i>csbD</i>  | 1.09  | 2.72   | 2.50 | 0.01 |
| BSU36690 | <i>rapB</i>  | 1.13  | 0.47   | 0.42 | 0.00 |
| BSU36700 | <i>moaA</i>  | 4.04  | 4.59   | 1.14 | 0.08 |
| BSU36710 | <i>fdhD</i>  | 1.84  | 4.35   | 2.36 | 0.00 |
| BSU36720 | <i>ywmE</i>  | 5.42  | 3.72   | 0.69 | 0.03 |
| BSU36760 | <i>murAA</i> | 18.09 | 11.77  | 0.65 | 0.01 |
| BSU36770 | <i>ywmB</i>  | 2.81  | 5.54   | 1.97 | 0.00 |
| BSU36780 | <i>ywzB</i>  | 2.52  | 8.57   | 3.40 | 0.00 |
| BSU36790 | <i>ywmA</i>  | 0.61  | 2.22   | 3.63 | 0.02 |
| BSU36800 | <i>atpC</i>  | 92.86 | 67.81  | 0.73 | 0.08 |
| BSU36810 | <i>atpD</i>  | 65.87 | 56.18  | 0.85 | 0.33 |
| BSU36820 | <i>atpG</i>  | 43.92 | 38.84  | 0.88 | 0.11 |
| BSU36830 | <i>atpA</i>  | 41.63 | 41.06  | 0.99 | 0.93 |
| BSU36840 | <i>atpH</i>  | 30.88 | 32.70  | 1.06 | 0.38 |
| BSU36850 | <i>atpF</i>  | 29.28 | 29.36  | 1.00 | 0.97 |
| BSU36860 | <i>atpE</i>  | 53.77 | 36.45  | 0.68 | 0.00 |
| BSU36870 | <i>atpB</i>  | 29.56 | 29.40  | 0.99 | 0.93 |
| BSU36880 | <i>atpI</i>  | 12.08 | 110.74 | 9.17 | 0.00 |
| BSU36890 | <i>upp</i>   | 5.96  | 5.04   | 0.85 | 0.03 |
| BSU36900 | <i>glyA</i>  | 27.41 | 8.24   | 0.30 | 0.00 |
| BSU36910 | <i>ywlG</i>  | 7.54  | 4.70   | 0.62 | 0.02 |
| BSU36920 | <i>ywlF</i>  | 5.47  | 4.10   | 0.75 | 0.05 |
| BSU36930 | <i>ywlE</i>  | 1.27  | 1.47   | 1.16 | 0.04 |
| BSU36950 | <i>ywlC</i>  | 1.80  | 1.70   | 0.94 | 0.69 |
| BSU36990 | <i>ywkF</i>  | 2.16  | 2.42   | 1.12 | 0.20 |
| BSU37000 | <i>prmC</i>  | 2.68  | 2.43   | 0.91 | 0.41 |
| BSU37010 | <i>prfA</i>  | 14.85 | 8.75   | 0.59 | 0.02 |
| BSU37020 | <i>ywkD</i>  | 1.60  | 1.18   | 0.74 | 0.00 |
| BSU37030 | <i>racA</i>  | 1.62  | 0.98   | 0.60 | 0.01 |

|          |              |        |        |      |      |
|----------|--------------|--------|--------|------|------|
| BSU37060 | <i>tdk</i>   | 1.75   | 6.25   | 3.57 | 0.00 |
| BSU37070 | <i>rpmE</i>  | 253.67 | 312.74 | 1.23 | 0.32 |
| BSU37080 | <i>rho</i>   | 5.42   | 12.94  | 2.39 | 0.00 |
| BSU37090 | <i>glpX</i>  | 13.64  | 10.22  | 0.75 | 0.14 |
| BSU37100 | <i>murAB</i> | 7.63   | 8.06   | 1.06 | 0.70 |
| BSU37110 | <i>ywjH</i>  | 99.01  | 27.40  | 0.28 | 0.00 |
| BSU37120 | <i>fbaA</i>  | 316.78 | 113.62 | 0.36 | 0.00 |
| BSU37130 | <i>spoOF</i> | 2.24   | 1.01   | 0.45 | 0.00 |
| BSU37140 | <i>ywjG</i>  | 2.47   | 4.05   | 1.64 | 0.00 |
| BSU37150 | <i>pyrG</i>  | 13.26  | 6.03   | 0.45 | 0.00 |
| BSU37160 | <i>rpoE</i>  | 8.40   | 4.74   | 0.56 | 0.00 |
| BSU37210 | <i>ywjC</i>  | 18.46  | 10.53  | 0.57 | 0.04 |
| BSU37220 | <i>ywjB</i>  | 14.12  | 16.02  | 1.13 | 0.30 |
| BSU37230 | <i>ywjA</i>  | 8.19   | 13.49  | 1.65 | 0.04 |
| BSU37240 | <i>ywiE</i>  | 6.98   | 8.33   | 1.19 | 0.08 |
| BSU37250 | <i>narI</i>  | 1.14   | 0.29   | 0.25 | 0.20 |
| BSU37260 | <i>narJ</i>  | 1.19   | 0.29   | 0.25 | 0.17 |
| BSU37270 | <i>narH</i>  | 1.31   | 0.26   | 0.20 | 0.14 |
| BSU37280 | <i>narG</i>  | 1.65   | 0.28   | 0.17 | 0.09 |
| BSU37310 | <i>fnr</i>   | 3.08   | 0.85   | 0.28 | 0.00 |
| BSU37330 | <i>argS</i>  | 7.50   | 5.61   | 0.75 | 0.14 |
| BSU37340 | <i>ywiB</i>  | 2.36   | 3.18   | 1.35 | 0.03 |
| BSU37350 | <i>sboA</i>  | 2.95   | 0.16   | 0.05 | 0.02 |
| BSU37360 | <i>sboX</i>  | 2.17   | 0.13   | 0.06 | 0.01 |
| BSU37370 | <i>albA</i>  | 2.36   | 2.16   | 0.92 | 0.38 |
| BSU37380 | <i>albB</i>  | 3.88   | 3.48   | 0.90 | 0.50 |
| BSU37390 | <i>albC</i>  | 1.43   | 1.30   | 0.91 | 0.62 |
| BSU37460 | <i>rapF</i>  | 3.05   | 2.48   | 0.81 | 0.27 |
| BSU37470 | <i>phrF</i>  | 6.54   | 2.22   | 0.34 | 0.02 |
| BSU37490 | <i>speB</i>  | 3.69   | 3.23   | 0.88 | 0.47 |
| BSU37500 | <i>speE</i>  | 1.65   | 1.76   | 1.07 | 0.22 |
| BSU37520 | <i>ywhD</i>  | 6.14   | 4.50   | 0.73 | 0.01 |
| BSU37530 | <i>ywhC</i>  | 2.60   | 2.73   | 1.05 | 0.57 |
| BSU37540 | <i>ywhB</i>  | 22.12  | 4.71   | 0.21 | 0.00 |
| BSU37550 | <i>ywhA</i>  | 1.40   | 1.37   | 0.98 | 0.90 |
| BSU37590 | <i>ywgA</i>  | 3.21   | 2.25   | 0.70 | 0.00 |
| BSU37600 | <i>ywfO</i>  | 1.55   | 1.74   | 1.12 | 0.16 |
| BSU37640 | <i>ywfL</i>  | 1.50   | 1.10   | 0.74 | 0.05 |
| BSU37660 | <i>eutD</i>  | 53.98  | 19.15  | 0.35 | 0.00 |
| BSU37670 | <i>ywfI</i>  | 14.82  | 4.91   | 0.33 | 0.00 |
| BSU37690 | <i>ywfG</i>  | 1.08   | 0.27   | 0.25 | 0.00 |
| BSU37780 | <i>rocA</i>  | 2.09   | 2.37   | 1.14 | 0.31 |
| BSU37800 | <i>yweA</i>  | 8.91   | 0.97   | 0.11 | 0.00 |
| BSU37930 | <i>ywdK</i>  | 7.64   | 4.48   | 0.59 | 0.00 |
| BSU37940 | <i>ywdJ</i>  | 3.56   | 3.16   | 0.89 | 0.18 |
| BSU37950 | <i>ywdI</i>  | 1.80   | 2.08   | 1.16 | 0.22 |
| BSU37970 | <i>ung</i>   | 3.68   | 2.30   | 0.63 | 0.01 |
| BSU37980 | <i>ywdF</i>  | 2.16   | 1.61   | 0.75 | 0.02 |
| BSU38020 | <i>thiD</i>  | 5.49   | 3.04   | 0.55 | 0.01 |
| BSU38030 | <i>ywdA</i>  | 14.37  | 2.08   | 0.14 | 0.00 |

|          |             |        |       |      |      |
|----------|-------------|--------|-------|------|------|
| BSU38040 | <i>sacA</i> | 8.25   | 2.07  | 0.25 | 0.00 |
| BSU38050 | <i>sacP</i> | 3.10   | 1.33  | 0.43 | 0.00 |
| BSU38060 | <i>ywcJ</i> | 3.90   | 1.35  | 0.35 | 0.00 |
| BSU38070 | <i>sacT</i> | 2.04   | 0.77  | 0.38 | 0.00 |
| BSU38100 | <i>ywcH</i> | 1.31   | 1.51  | 1.16 | 0.31 |
| BSU38110 | <i>nfrA</i> | 20.13  | 6.58  | 0.33 | 0.00 |
| BSU38120 | <i>rodA</i> | 2.51   | 1.33  | 0.53 | 0.04 |
| BSU38140 | <i>qoxD</i> | 132.85 | 91.00 | 0.69 | 0.06 |
| BSU38150 | <i>qoxC</i> | 115.35 | 84.28 | 0.73 | 0.02 |
| BSU38160 | <i>qoxB</i> | 78.86  | 70.12 | 0.89 | 0.36 |
| BSU38170 | <i>qoxA</i> | 72.51  | 55.73 | 0.77 | 0.04 |
| BSU38180 | <i>ywzA</i> | 18.70  | 13.11 | 0.70 | 0.06 |
| BSU38190 | <i>galT</i> | 4.23   | 3.43  | 0.81 | 0.14 |
| BSU38200 | <i>galK</i> | 2.83   | 2.42  | 0.86 | 0.09 |
| BSU38210 | <i>ywcD</i> | 1.40   | 0.82  | 0.58 | 0.02 |
| BSU38229 | <i>slrA</i> | 1.82   | 5.13  | 2.81 | 0.01 |
| BSU38250 | <i>ywbO</i> | 3.85   | 1.21  | 0.32 | 0.00 |
| BSU38260 | <i>efeN</i> | 14.65  | 4.77  | 0.33 | 0.00 |
| BSU38270 | <i>efeM</i> | 8.71   | 3.34  | 0.38 | 0.00 |
| BSU38280 | <i>efeU</i> | 2.50   | 1.18  | 0.47 | 0.00 |
| BSU38290 | <i>thiE</i> | 4.72   | 2.62  | 0.55 | 0.01 |
| BSU38300 | <i>thiM</i> | 2.62   | 2.27  | 0.87 | 0.52 |
| BSU38310 | <i>ywbl</i> | 1.26   | 1.11  | 0.88 | 0.24 |
| BSU38320 | <i>ywbH</i> | 3.68   | 3.31  | 0.90 | 0.16 |
| BSU38330 | <i>lrgB</i> | 4.05   | 3.66  | 0.90 | 0.64 |
| BSU38340 | <i>ywbF</i> | 0.39   | 1.13  | 2.91 | 0.00 |
| BSU38350 | <i>ywbE</i> | 1.15   | 0.74  | 0.64 | 0.08 |
| BSU38360 | <i>ywbD</i> | 1.72   | 1.30  | 0.75 | 0.01 |
| BSU38370 | <i>ywbC</i> | 3.67   | 1.36  | 0.37 | 0.00 |
| BSU38430 | <i>gspA</i> | 11.90  | 10.08 | 0.85 | 0.20 |
| BSU38480 | <i>ywaC</i> | 4.15   | 0.88  | 0.21 | 0.00 |
| BSU38490 | <i>menA</i> | 3.35   | 4.63  | 1.38 | 0.04 |
| BSU38499 | <i>ywzH</i> | 20.24  | 20.46 | 1.01 | 0.95 |
| BSU38500 | <i>dltA</i> | 27.99  | 30.48 | 1.09 | 0.09 |
| BSU38510 | <i>dltB</i> | 29.10  | 30.82 | 1.06 | 0.31 |
| BSU38520 | <i>dltC</i> | 54.43  | 44.36 | 0.81 | 0.25 |
| BSU38530 | <i>dltD</i> | 44.78  | 39.77 | 0.89 | 0.09 |
| BSU38540 | <i>dltE</i> | 61.22  | 48.24 | 0.79 | 0.06 |
| BSU38550 | <i>ywaA</i> | 4.88   | 3.00  | 0.61 | 0.00 |
| BSU38560 | <i>licH</i> | 2.05   | 1.33  | 0.65 | 0.20 |
| BSU38570 | <i>licA</i> | 1.75   | 1.41  | 0.81 | 0.35 |
| BSU38640 | <i>yxIH</i> | 2.50   | 1.18  | 0.47 | 0.01 |
| BSU38650 | <i>yxIG</i> | 2.94   | 1.03  | 0.35 | 0.01 |
| BSU38660 | <i>yxIF</i> | 2.41   | 0.73  | 0.30 | 0.00 |
| BSU38670 | <i>yxIE</i> | 2.90   | 0.97  | 0.33 | 0.00 |
| BSU38680 | <i>yxID</i> | 2.72   | 0.88  | 0.32 | 0.00 |
| BSU38690 | <i>yxIC</i> | 1.94   | 0.63  | 0.32 | 0.00 |
| BSU38700 | <i>sigY</i> | 1.03   | 0.44  | 0.43 | 0.00 |
| BSU38730 | <i>cydD</i> | 18.79  | 15.74 | 0.84 | 0.66 |
| BSU38740 | <i>cydC</i> | 26.53  | 17.73 | 0.67 | 0.27 |

|          |             |       |       |      |      |
|----------|-------------|-------|-------|------|------|
| BSU38750 | <i>cydB</i> | 31.72 | 17.47 | 0.55 | 0.04 |
| BSU38760 | <i>cydA</i> | 22.53 | 10.19 | 0.45 | 0.00 |
| BSU38770 | <i>cimH</i> | 1.27  | 0.75  | 0.59 | 0.06 |
| BSU38790 | <i>yxzE</i> | 4.46  | 1.81  | 0.40 | 0.01 |
| BSU38810 | <i>msmX</i> | 2.43  | 2.42  | 1.00 | 0.99 |
| BSU38850 | <i>yxkC</i> | 15.96 | 1.14  | 0.07 | 0.00 |
| BSU38860 | <i>galE</i> | 6.56  | 4.22  | 0.64 | 0.01 |
| BSU38890 | <i>yxjN</i> | 0.86  | 1.21  | 1.40 | 0.02 |
| BSU38920 | <i>pepT</i> | 5.25  | 2.36  | 0.45 | 0.01 |
| BSU38930 | <i>yxjJ</i> | 1.50  | 0.86  | 0.57 | 0.04 |
| BSU38940 | <i>yxjI</i> | 7.43  | 2.83  | 0.38 | 0.01 |
| BSU38950 | <i>yxjH</i> | 1.04  | 0.52  | 0.50 | 0.00 |
| BSU38960 | <i>yxjG</i> | 1.04  | 0.41  | 0.40 | 0.00 |
| BSU39010 | <i>yxjB</i> | 1.08  | 1.33  | 1.23 | 0.01 |
| BSU39020 | <i>yxjA</i> | 1.93  | 1.22  | 0.63 | 0.04 |
| BSU39040 | <i>yxjS</i> | 4.91  | 7.22  | 1.47 | 0.03 |
| BSU39050 | <i>katE</i> | 3.40  | 5.09  | 1.50 | 0.04 |
| BSU39070 | <i>bglS</i> | 1.06  | 0.55  | 0.52 | 0.00 |
| BSU39080 | <i>licT</i> | 2.00  | 2.34  | 1.17 | 0.10 |
| BSU39110 | <i>deaD</i> | 3.19  | 3.97  | 1.25 | 0.03 |
| BSU39120 | <i>yxjM</i> | 1.48  | 2.96  | 2.00 | 0.00 |
| BSU39139 | <i>yxzJ</i> | 4.15  | 5.99  | 1.44 | 0.06 |
| BSU39140 | <i>yxjK</i> | 3.38  | 4.89  | 1.45 | 0.01 |
| BSU39150 | <i>yxjI</i> | 3.14  | 4.22  | 1.35 | 0.00 |
| BSU39160 | <i>yxjL</i> | 3.01  | 4.54  | 1.51 | 0.01 |
| BSU39170 | <i>yxzG</i> | 3.52  | 5.27  | 1.50 | 0.02 |
| BSU39180 | <i>yxjH</i> | 4.03  | 5.02  | 1.25 | 0.31 |
| BSU39190 | <i>yxjG</i> | 4.44  | 5.74  | 1.29 | 0.42 |
| BSU39200 | <i>yxzC</i> | 4.14  | 5.63  | 1.36 | 0.23 |
| BSU39210 | <i>yxjF</i> | 3.72  | 5.47  | 1.47 | 0.01 |
| BSU39220 | <i>yxjG</i> | 32.43 | 16.16 | 0.50 | 0.05 |
| BSU39230 | <i>wapA</i> | 21.71 | 17.72 | 0.82 | 0.09 |
| BSU39250 | <i>yxjE</i> | 37.49 | 21.32 | 0.57 | 0.00 |
| BSU39260 | <i>bglH</i> | 4.82  | 17.66 | 3.66 | 0.00 |
| BSU39270 | <i>bglP</i> | 2.32  | 16.06 | 6.92 | 0.00 |
| BSU39280 | <i>yxjE</i> | 5.35  | 1.84  | 0.34 | 0.01 |
| BSU39290 | <i>yxjD</i> | 3.59  | 1.33  | 0.37 | 0.10 |
| BSU39400 | <i>pdp</i>  | 19.52 | 9.50  | 0.49 | 0.02 |
| BSU39410 | <i>nupC</i> | 12.60 | 8.28  | 0.66 | 0.02 |
| BSU39420 | <i>deoC</i> | 9.57  | 7.23  | 0.76 | 0.08 |
| BSU39430 | <i>deoR</i> | 0.88  | 1.28  | 1.46 | 0.04 |
| BSU39440 | <i>yxjB</i> | 0.77  | 1.17  | 1.52 | 0.02 |
| BSU39550 | <i>yxjH</i> | 5.54  | 3.34  | 0.60 | 0.00 |
| BSU39560 | <i>yxjG</i> | 0.63  | 1.15  | 1.82 | 0.00 |
| BSU39570 | <i>yxjF</i> | 0.58  | 1.55  | 2.66 | 0.00 |
| BSU39580 | <i>yxjE</i> | 0.60  | 1.61  | 2.71 | 0.00 |
| BSU39600 | <i>yxjC</i> | 7.15  | 4.71  | 0.66 | 0.03 |
| BSU39610 | <i>yxjB</i> | 19.07 | 8.27  | 0.43 | 0.00 |
| BSU39670 | <i>iolJ</i> | 1.59  | 0.92  | 0.58 | 0.05 |
| BSU39680 | <i>iolI</i> | 1.62  | 0.83  | 0.51 | 0.00 |

|          |             |        |       |       |      |
|----------|-------------|--------|-------|-------|------|
| BSU39690 | <i>iolH</i> | 2.45   | 0.93  | 0.38  | 0.00 |
| BSU39700 | <i>iolG</i> | 1.97   | 1.12  | 0.57  | 0.00 |
| BSU39710 | <i>iolF</i> | 1.55   | 1.03  | 0.67  | 0.01 |
| BSU39720 | <i>iolE</i> | 1.51   | 1.09  | 0.72  | 0.04 |
| BSU39730 | <i>iolD</i> | 1.28   | 0.98  | 0.76  | 0.11 |
| BSU39740 | <i>iolC</i> | 1.07   | 0.88  | 0.82  | 0.14 |
| BSU39770 | <i>iolR</i> | 1.14   | 0.87  | 0.77  | 0.04 |
| BSU39780 | <i>iolS</i> | 13.11  | 3.75  | 0.29  | 0.00 |
| BSU39790 | <i>yxcE</i> | 2.61   | 1.67  | 0.64  | 0.01 |
| BSU39800 | <i>yxcD</i> | 3.50   | 2.10  | 0.60  | 0.00 |
| BSU39810 | <i>csbC</i> | 9.54   | 19.04 | 1.99  | 0.04 |
| BSU39820 | <i>htpG</i> | 8.36   | 1.99  | 0.24  | 0.00 |
| BSU39830 | <i>yxcA</i> | 1.29   | 0.92  | 0.71  | 0.14 |
| BSU39840 | <i>yxbG</i> | 1.32   | 1.78  | 1.35  | 0.13 |
| BSU39940 | <i>yxal</i> | 3.37   | 0.56  | 0.17  | 0.00 |
| BSU39960 | <i>yxal</i> | 3.58   | 2.59  | 0.72  | 0.05 |
| BSU39990 | <i>yxaF</i> | 0.93   | 3.84  | 4.11  | 0.00 |
| BSU40000 | <i>yxnA</i> | 1.10   | 1.78  | 1.62  | 0.10 |
| BSU40030 | <i>yxaB</i> | 1.22   | 0.91  | 0.75  | 0.12 |
| BSU40050 | <i>gntR</i> | 0.23   | 2.40  | 10.27 | 0.00 |
| BSU40060 | <i>gntK</i> | 0.60   | 6.17  | 10.24 | 0.00 |
| BSU40070 | <i>gntP</i> | 5.79   | 11.75 | 2.03  | 0.01 |
| BSU40080 | <i>gntZ</i> | 15.58  | 17.73 | 1.14  | 0.13 |
| BSU40090 | <i>ahpC</i> | 84.23  | 27.32 | 0.32  | 0.00 |
| BSU40100 | <i>ahpF</i> | 109.20 | 35.75 | 0.33  | 0.02 |
| BSU40110 | <i>bglA</i> | 2.83   | 1.49  | 0.53  | 0.00 |
| BSU40120 | <i>yyzE</i> | 2.23   | 2.42  | 1.08  | 0.55 |
| BSU40140 | <i>yydJ</i> | 1.20   | 0.62  | 0.51  | 0.14 |
| BSU40190 | <i>fbp</i>  | 2.00   | 1.57  | 0.79  | 0.04 |
| BSU40200 | <i>yydD</i> | 3.96   | 1.45  | 0.37  | 0.08 |
| BSU40210 | <i>yydC</i> | 3.95   | 1.34  | 0.34  | 0.13 |
| BSU40220 | <i>yydB</i> | 3.14   | 1.37  | 0.44  | 0.05 |
| BSU40230 | <i>yydA</i> | 1.71   | 1.10  | 0.64  | 0.00 |
| BSU40300 | <i>rapG</i> | 1.87   | 0.45  | 0.24  | 0.00 |
| BSU40310 | <i>phrG</i> | 6.37   | 0.68  | 0.11  | 0.00 |
| BSU40320 | <i>argI</i> | 3.51   | 1.84  | 0.52  | 0.02 |
| BSU40330 | <i>rocE</i> | 2.47   | 1.41  | 0.57  | 0.02 |
| BSU40340 | <i>rocD</i> | 2.33   | 1.30  | 0.56  | 0.02 |
| BSU40360 | <i>htrC</i> | 6.29   | 4.61  | 0.73  | 0.05 |
| BSU40370 | <i>yycJ</i> | 5.15   | 4.57  | 0.89  | 0.46 |
| BSU40380 | <i>yycI</i> | 4.73   | 4.04  | 0.85  | 0.03 |
| BSU40390 | <i>walH</i> | 4.41   | 4.11  | 0.93  | 0.10 |
| BSU40400 | <i>walK</i> | 2.60   | 3.17  | 1.22  | 0.00 |
| BSU40410 | <i>walR</i> | 2.58   | 2.56  | 1.00  | 0.94 |
| BSU40420 | <i>purA</i> | 15.17  | 6.31  | 0.42  | 0.00 |
| BSU40440 | <i>dnaC</i> | 0.91   | 1.22  | 1.34  | 0.08 |
| BSU40470 | <i>yycC</i> | 5.01   | 7.56  | 1.51  | 0.10 |
| BSU40480 | <i>yycB</i> | 5.14   | 5.49  | 1.07  | 0.64 |
| BSU40500 | <i>rplI</i> | 8.12   | 8.32  | 1.02  | 0.73 |
| BSU40510 | <i>yybT</i> | 2.16   | 3.66  | 1.69  | 0.00 |

|          |                |        |        |      |      |
|----------|----------------|--------|--------|------|------|
| BSU40520 | <i>yybS</i>    | 1.17   | 2.97   | 2.53 | 0.01 |
| BSU40529 | <i>yyzH</i>    | 3.98   | 3.26   | 0.82 | 0.47 |
| BSU40550 | <i>ppaC</i>    | 31.64  | 9.25   | 0.29 | 0.00 |
| BSU40580 | <i>yybN</i>    | 19.63  | 8.68   | 0.44 | 0.00 |
| BSU40590 | <i>yybM</i>    | 1.38   | 1.26   | 0.91 | 0.87 |
| BSU40620 | <i>yybJ</i>    | 3.49   | 1.64   | 0.47 | 0.07 |
| BSU40650 | <i>yybG</i>    | 1.09   | 0.44   | 0.40 | 0.00 |
| BSU40660 | <i>yybF</i>    | 1.16   | 0.35   | 0.30 | 0.01 |
| BSU40750 | <i>yyaQ</i>    | 1.64   | 1.51   | 0.92 | 0.69 |
| BSU40760 | <i>yyaP</i>    | 1.63   | 0.64   | 0.39 | 0.02 |
| BSU40780 | <i>tetL</i>    | 1.20   | 0.90   | 0.75 | 0.18 |
| BSU40820 | <i>yyaL</i>    | 1.26   | 0.94   | 0.74 | 0.05 |
| BSU40830 | <i>yyaK</i>    | 1.16   | 1.35   | 1.16 | 0.30 |
| BSU40880 | <i>exoAA</i>   | 0.74   | 1.30   | 1.77 | 0.00 |
| BSU40890 | <i>rpsR</i>    | 261.95 | 202.07 | 0.77 | 0.06 |
| BSU40900 | <i>ssbA</i>    | 263.43 | 218.43 | 0.83 | 0.00 |
| BSU40910 | <i>rpsF</i>    | 275.73 | 539.72 | 1.96 | 0.01 |
| BSU40920 | <i>yyaF</i>    | 4.39   | 5.14   | 1.17 | 0.02 |
| BSU40930 | <i>yyaE</i>    | 0.81   | 1.34   | 1.66 | 0.00 |
| BSU40939 | <i>yyzM</i>    | 1.65   | 3.08   | 1.87 | 0.04 |
| BSU40960 | <i>parB</i>    | 10.62  | 4.09   | 0.39 | 0.00 |
| BSU40970 | <i>parA</i>    | 6.71   | 3.07   | 0.46 | 0.00 |
| BSU40980 | <i>yyaB</i>    | 2.19   | 0.44   | 0.20 | 0.00 |
| BSU40990 | <i>noc</i>     | 16.40  | 11.54  | 0.70 | 0.03 |
| BSU41000 | <i>gidB</i>    | 13.00  | 9.79   | 0.75 | 0.01 |
| BSU41010 | <i>gidA</i>    | 6.66   | 6.56   | 0.98 | 0.82 |
| BSU41020 | <i>trmE</i>    | 2.06   | 2.93   | 1.42 | 0.02 |
| BSU41030 | <i>jag</i>     | 14.65  | 19.74  | 1.35 | 0.01 |
| BSU41040 | <i>spolIII</i> | 8.93   | 12.86  | 1.44 | 0.05 |
| BSU41050 | <i>rnpA</i>    | 3.74   | 11.68  | 3.12 | 0.00 |
| BSU41060 | <i>rpmH</i>    | 43.32  | 54.96  | 1.27 | 0.58 |



Table S2. Functional categories of genes and differential expression in wild-type and *pnpA* mutant strains

|                                                 | All CDSs | Above cutoff |                      | Differentially expressed (P<0.05) |                      | >1.5 increase in <i>pnpA</i> |                      | >1.5 decrease in <i>pnpA</i> |                      |
|-------------------------------------------------|----------|--------------|----------------------|-----------------------------------|----------------------|------------------------------|----------------------|------------------------------|----------------------|
|                                                 |          | Number       | Percent <sup>a</sup> | Number                            | Percent <sup>b</sup> | Number                       | Percent <sup>b</sup> | Number                       | Percent <sup>b</sup> |
| <b>Total</b>                                    | 4176     | 2276         | 54.5                 | 1501                              | 65.9                 | 412                          | 18.1                 | 720                          | 31.6                 |
| <b>Functional Categories</b>                    |          |              |                      |                                   |                      |                              |                      |                              |                      |
| lifestyles/miscellaneous                        | 9        | 8            | 88.9                 | 4                                 | 50.0                 | 1                            | 12.5                 | 0                            | 0.0                  |
| homeostasis                                     | 94       | 76           | 80.9                 | 53                                | 69.7                 | 13                           | 17.1                 | 34                           | 44.7                 |
| protein synthesis, modification & degradation   | 367      | 279          | 76.0                 | 193                               | 69.2                 | 69                           | 24.7                 | 51                           | 18.3                 |
| electron transport & ATP synthesis              | 98       | 74           | 75.5                 | 45                                | 60.8                 | 10                           | 13.5                 | 24                           | 32.4                 |
| RNA synthesis & degradation                     | 62       | 46           | 74.2                 | 28                                | 60.9                 | 10                           | 21.7                 | 10                           | 21.7                 |
| genetics                                        | 176      | 125          | 71.0                 | 76                                | 60.8                 | 20                           | 16.0                 | 30                           | 24.0                 |
| cell envelope & cell division                   | 186      | 131          | 70.4                 | 84                                | 64.1                 | 5                            | 3.8                  | 47                           | 35.9                 |
| lipid metabolism                                | 89       | 62           | 69.7                 | 38                                | 61.3                 | 15                           | 24.2                 | 10                           | 16.1                 |
| exponential & early post-exponential lifestyles | 172      | 119          | 69.2                 | 84                                | 70.6                 | 8                            | 6.7                  | 81                           | 68.1                 |
| nucleotide metabolism                           | 106      | 73           | 68.9                 | 48                                | 65.8                 | 7                            | 9.6                  | 30                           | 41.1                 |
| coping with stress                              | 580      | 379          | 65.3                 | 246                               | 64.9                 | 65                           | 17.2                 | 123                          | 32.5                 |
| additional metabolic pathways                   | 331      | 208          | 62.8                 | 133                               | 63.9                 | 28                           | 13.5                 | 73                           | 35.1                 |
| carbon metabolism                               | 286      | 156          | 54.5                 | 114                               | 73.1                 | 32                           | 20.5                 | 65                           | 41.7                 |
| regulation of gene expression                   | 426      | 227          | 53.3                 | 154                               | 67.8                 | 48                           | 21.1                 | 76                           | 33.5                 |
| Unknown                                         | 1011     | 536          | 53.0                 | 349                               | 65.1                 | 96                           | 17.9                 | 181                          | 33.8                 |
| transporters                                    | 435      | 220          | 50.6                 | 151                               | 68.6                 | 55                           | 25.0                 | 64                           | 29.1                 |
| amino acid/nitrogen metabolism                  | 254      | 115          | 45.3                 | 84                                | 73.0                 | 21                           | 18.3                 | 49                           | 42.6                 |
| sporulation                                     | 562      | 163          | 29.0                 | 90                                | 55.2                 | 36                           | 22.1                 | 41                           | 25.2                 |
| prophages                                       | 287      | 80           | 27.9                 | 44                                | 55.0                 | 2                            | 2.5                  | 29                           | 36.3                 |
| mobile genetic elements                         | 13       | 3            | 23.1                 | 2                                 | 66.7                 | 1                            | 33.3                 | 1                            | 33.3                 |

<sup>a</sup> percent of all CDSs in the category

<sup>b</sup> percent of CDSs above cutoff in the category

**Table S3. 5' one-third and 3' one-third reads in wild type and *pnpA* strains.**

| <b>Accession number</b> | <b>Gene</b>  | <b>5'/3' Ratio WT</b> | <b>P value WT</b> | <b>5'/3' Ratio <i>pnpA</i></b> | <b>P value <i>pnpA</i></b> |
|-------------------------|--------------|-----------------------|-------------------|--------------------------------|----------------------------|
| BSU00010                | <i>dnaA</i>  | 0.40                  | 0.00              | 0.72                           | 0.12                       |
| BSU00020                | <i>dnaN</i>  | 0.51                  | 0.00              | 0.60                           | 0.05                       |
| BSU00030                | <i>yaaA</i>  | 0.57                  | 0.04              | 0.52                           | 0.04                       |
| BSU00040                | <i>recF</i>  | 0.72                  | 0.00              | 0.56                           | 0.01                       |
| BSU00050                | <i>yaaB</i>  | 1.10                  | 0.31              | 1.70                           | 0.18                       |
| BSU00060                | <i>gyrB</i>  | 0.48                  | 0.00              | 0.72                           | 0.00                       |
| BSU00070                | <i>gyrA</i>  | 0.52                  | 0.00              | 0.57                           | 0.01                       |
| BSU00090                | <i>guaB</i>  | 0.43                  | 0.00              | 0.49                           | 0.00                       |
| BSU00100                | <i>dacA</i>  | 0.33                  | 0.00              | 0.51                           | 0.01                       |
| BSU00110                | <i>yaaD</i>  | 0.65                  | 0.01              | 0.81                           | 0.19                       |
| BSU00120                | <i>yaaE</i>  | 0.72                  | 0.01              | 0.97                           | 0.68                       |
| BSU00130                | <i>serS</i>  | 0.69                  | 0.06              | 0.83                           | 0.16                       |
| BSU00140                | <i>dck</i>   | 1.09                  | 0.58              | 1.18                           | 0.44                       |
| BSU00150                | <i>dgk</i>   | 0.68                  | 0.02              | 1.04                           | 0.80                       |
| BSU00180                | <i>tadA</i>  | 1.72                  | 0.06              | 1.20                           | 0.00                       |
| BSU00190                | <i>dnaX</i>  | 0.75                  | 0.12              | 0.94                           | 0.54                       |
| BSU00200                | <i>yaaK</i>  | 0.52                  | 0.05              | 0.64                           | 0.00                       |
| BSU00210                | <i>recR</i>  | 0.83                  | 0.13              | 0.80                           | 0.12                       |
| BSU00220                | <i>yaaL</i>  | 1.16                  | 0.30              | 1.33                           | 0.30                       |
| BSU00230                | <i>bofA</i>  | 6.35                  | 0.00              | 1.21                           | 0.61                       |
| BSU00250                | <i>xpaC</i>  | 0.61                  | 0.10              | 0.46                           | 0.01                       |
| BSU00260                | <i>yaaN</i>  | 0.90                  | 0.41              | 0.55                           | 0.00                       |
| BSU00270                | <i>yaaO</i>  | 0.90                  | 0.25              | 0.80                           | 0.01                       |
| BSU00280                | <i>tmk</i>   | 0.76                  | 0.00              | 0.64                           | 0.02                       |
| BSU00290                | <i>yaaQ</i>  | 0.91                  | 0.14              | 1.05                           | 0.79                       |
| BSU00300                | <i>yaaR</i>  | 1.18                  | 0.07              | 1.10                           | 0.67                       |
| BSU00310                | <i>holB</i>  | 0.81                  | 0.03              | 0.79                           | 0.22                       |
| BSU00320                | <i>yaaT</i>  | 0.78                  | 0.01              | 0.78                           | 0.02                       |
| BSU00330                | <i>yabA</i>  | 1.61                  | 0.00              | 2.15                           | 0.00                       |
| BSU00340                | <i>yabB</i>  | 0.81                  | 0.07              | 0.83                           | 0.05                       |
| BSU00350                | <i>yazA</i>  | 1.15                  | 0.29              | 1.24                           | 0.34                       |
| BSU00360                | <i>yabC</i>  | 1.03                  | 0.94              | 0.84                           | 0.07                       |
| BSU00370                | <i>abrB</i>  | 1.05                  | 0.12              | 1.27                           | 0.56                       |
| BSU00380                | <i>metS</i>  | 0.29                  | 0.00              | 0.54                           | 0.00                       |
| BSU00390                | <i>yabD</i>  | 0.57                  | 0.01              | 0.99                           | 0.89                       |
| BSU00400                | <i>yabE</i>  | 0.39                  | 0.00              | 2.18                           | 0.01                       |
| BSU00420                | <i>ksgA</i>  | 0.66                  | 0.00              | 0.72                           | 0.04                       |
| BSU00440                | <i>veg</i>   | 1.08                  | 0.88              | 1.36                           | 0.19                       |
| BSU00450                | <i>sspF</i>  | 1.69                  | 0.19              | 1.53                           | 0.10                       |
| BSU00460                | <i>ipk</i>   | 0.41                  | 0.00              | 0.36                           | 0.00                       |
| BSU00470                | <i>purR</i>  | 0.25                  | 0.00              | 0.44                           | 0.01                       |
| BSU00480                | <i>yabJ</i>  | 1.83                  | 0.00              | 1.86                           | 0.06                       |
| BSU00490                | <i>spoVG</i> | 0.96                  | 0.82              | 1.32                           | 0.11                       |

|          |              |      |      |      |      |
|----------|--------------|------|------|------|------|
| BSU00500 | <i>glmU</i>  | 0.52 | 0.00 | 0.87 | 0.19 |
| BSU00510 | <i>prs</i>   | 0.47 | 0.00 | 0.62 | 0.01 |
| BSU00520 | <i>ctc</i>   | 0.72 | 0.13 | 0.72 | 0.10 |
| BSU00530 | <i>pth</i>   | 0.90 | 0.05 | 0.80 | 0.11 |
| BSU00540 | <i>yabK</i>  | 1.50 | 0.02 | 1.61 | 0.00 |
| BSU00550 | <i>mfd</i>   | 0.61 | 0.00 | 0.72 | 0.05 |
| BSU00560 | <i>spoVT</i> | 1.26 | 0.03 | 1.55 | 0.01 |
| BSU00570 | <i>yabM</i>  | 0.51 | 0.00 | 0.73 | 0.09 |
| BSU00580 | <i>yabN</i>  | 0.52 | 0.00 | 0.79 | 0.06 |
| BSU00590 | <i>yabO</i>  | 0.90 | 0.29 | 1.22 | 0.38 |
| BSU00600 | <i>yabP</i>  | 0.86 | 0.40 | 0.92 | 0.62 |
| BSU00610 | <i>yabQ</i>  | 0.84 | 0.16 | 0.81 | 0.39 |
| BSU00620 | <i>divIC</i> | 0.89 | 0.20 | 1.12 | 0.69 |
| BSU00630 | <i>yabR</i>  | 1.43 | 0.09 | 1.73 | 0.02 |
| BSU00650 | <i>yabS</i>  | 0.84 | 0.27 | 0.76 | 0.12 |
| BSU00670 | <i>tilS</i>  | 0.39 | 0.00 | 0.67 | 0.06 |
| BSU00680 | <i>hprT</i>  | 0.50 | 0.00 | 0.45 | 0.00 |
| BSU00690 | <i>ftsH</i>  | 0.36 | 0.00 | 0.64 | 0.00 |
| BSU00700 | <i>coaX</i>  | 0.43 | 0.00 | 0.66 | 0.01 |
| BSU00710 | <i>hslO</i>  | 0.67 | 0.02 | 1.07 | 0.72 |
| BSU00720 | <i>yacD</i>  | 0.63 | 0.04 | 0.70 | 0.00 |
| BSU00730 | <i>cysK</i>  | 0.51 | 0.02 | 0.61 | 0.00 |
| BSU00740 | <i>pabB</i>  | 0.26 | 0.00 | 0.04 | 0.00 |
| BSU00750 | <i>pabA</i>  | 0.90 | 0.28 | 1.00 | 0.97 |
| BSU00760 | <i>pabC</i>  | 1.08 | 0.09 | 0.97 | 0.49 |
| BSU00770 | <i>sul</i>   | 0.58 | 0.01 | 0.77 | 0.07 |
| BSU00780 | <i>folB</i>  | 1.05 | 0.60 | 0.96 | 0.64 |
| BSU00790 | <i>folK</i>  | 0.93 | 0.47 | 0.84 | 0.04 |
| BSU00800 | <i>yazB</i>  | 1.37 | 0.10 | 1.60 | 0.07 |
| BSU00810 | <i>dusB</i>  | 0.90 | 0.42 | 0.78 | 0.04 |
| BSU00820 | <i>lysS</i>  | 0.62 | 0.00 | 1.13 | 0.04 |
| BSU00830 | <i>ctsR</i>  | 0.70 | 0.12 | 0.74 | 0.35 |
| BSU00840 | <i>mcsA</i>  | 0.88 | 0.28 | 0.75 | 0.30 |
| BSU00850 | <i>mcsB</i>  | 0.70 | 0.02 | 0.71 | 0.04 |
| BSU00860 | <i>clpC</i>  | 0.54 | 0.00 | 0.94 | 0.49 |
| BSU00870 | <i>radA</i>  | 0.63 | 0.00 | 0.56 | 0.00 |
| BSU00880 | <i>yacK</i>  | 0.82 | 0.18 | 1.07 | 0.97 |
| BSU00890 | <i>yacL</i>  | 0.72 | 0.16 | 0.82 | 0.34 |
| BSU00900 | <i>ispD</i>  | 6.81 | 0.00 | 2.81 | 0.00 |
| BSU00910 | <i>ispF</i>  | 0.59 | 0.02 | 0.95 | 0.75 |
| BSU00920 | <i>gltX</i>  | 0.40 | 0.00 | 0.59 | 0.00 |
| BSU00930 | <i>cysE</i>  | 0.65 | 0.00 | 0.59 | 0.02 |
| BSU00940 | <i>cysS</i>  | 0.57 | 0.00 | 0.68 | 0.00 |
| BSU00950 | <i>mrnC</i>  | 1.17 | 0.00 | 0.88 | 0.02 |
| BSU00960 | <i>rlmB</i>  | 0.89 | 0.23 | 0.74 | 0.05 |
| BSU00970 | <i>yacP</i>  | 1.28 | 0.01 | 1.21 | 0.24 |
| BSU00980 | <i>sigH</i>  | 0.92 | 0.48 | 1.79 | 0.03 |

|          |             |      |      |      |      |
|----------|-------------|------|------|------|------|
| BSU00990 | <i>rpmG</i> | 0.72 | 0.05 | 0.76 | 0.37 |
| BSU01000 | <i>secE</i> | 1.24 | 0.11 | 1.27 | 0.47 |
| BSU01010 | <i>nusG</i> | 0.61 | 0.00 | 0.69 | 0.10 |
| BSU01020 | <i>rplK</i> | 0.84 | 0.03 | 0.94 | 0.60 |
| BSU01030 | <i>rplA</i> | 0.70 | 0.01 | 0.79 | 0.07 |
| BSU01040 | <i>rplJ</i> | 0.81 | 0.16 | 0.92 | 0.47 |
| BSU01050 | <i>rplL</i> | 1.19 | 0.29 | 1.16 | 0.20 |
| BSU01060 | <i>ybxB</i> | 1.19 | 0.16 | 2.19 | 0.04 |
| BSU01070 | <i>rpoB</i> | 0.51 | 0.03 | 0.37 | 0.01 |
| BSU01080 | <i>rpoC</i> | 0.59 | 0.05 | 0.58 | 0.03 |
| BSU01090 | <i>ybxF</i> | 0.87 | 0.23 | 0.79 | 0.16 |
| BSU01100 | <i>rpsL</i> | 0.70 | 0.03 | 0.69 | 0.02 |
| BSU01110 | <i>rpsG</i> | 0.83 | 0.14 | 0.85 | 0.09 |
| BSU01120 | <i>fusA</i> | 0.71 | 0.06 | 0.74 | 0.04 |
| BSU01130 | <i>tufA</i> | 0.79 | 0.08 | 1.08 | 0.56 |
| BSU01140 | <i>ybaC</i> | 0.91 | 0.34 | 0.93 | 0.85 |
| BSU01150 | <i>rpsJ</i> | 1.05 | 0.60 | 1.48 | 0.04 |
| BSU01160 | <i>rplC</i> | 0.88 | 0.08 | 0.95 | 0.47 |
| BSU01170 | <i>rplD</i> | 0.70 | 0.00 | 0.80 | 0.01 |
| BSU01180 | <i>rplW</i> | 0.89 | 0.11 | 0.90 | 0.39 |
| BSU01190 | <i>rplB</i> | 0.93 | 0.15 | 0.91 | 0.30 |
| BSU01200 | <i>rpsS</i> | 1.08 | 0.19 | 0.95 | 0.40 |
| BSU01210 | <i>rplV</i> | 1.13 | 0.29 | 1.03 | 0.71 |
| BSU01220 | <i>rpsC</i> | 0.89 | 0.40 | 0.84 | 0.23 |
| BSU01230 | <i>rplP</i> | 0.94 | 0.61 | 1.17 | 0.24 |
| BSU01240 | <i>rpmC</i> | 1.03 | 0.82 | 0.95 | 0.50 |
| BSU01250 | <i>rpsQ</i> | 0.99 | 0.88 | 1.15 | 0.03 |
| BSU01260 | <i>rplN</i> | 0.98 | 0.84 | 0.90 | 0.16 |
| BSU01270 | <i>rplX</i> | 1.14 | 0.30 | 1.17 | 0.16 |
| BSU01280 | <i>rplE</i> | 1.07 | 0.69 | 1.00 | 0.96 |
| BSU01290 | <i>rpsN</i> | 1.04 | 0.79 | 1.17 | 0.23 |
| BSU01300 | <i>rpsH</i> | 0.89 | 0.46 | 0.83 | 0.02 |
| BSU01310 | <i>rplF</i> | 1.02 | 0.92 | 0.92 | 0.60 |
| BSU01320 | <i>rplR</i> | 1.15 | 0.50 | 1.04 | 0.66 |
| BSU01330 | <i>rpsE</i> | 0.88 | 0.59 | 1.03 | 0.80 |
| BSU01340 | <i>rpmD</i> | 1.08 | 0.70 | 1.12 | 0.14 |
| BSU01350 | <i>rplO</i> | 0.88 | 0.49 | 1.11 | 0.53 |
| BSU01360 | <i>secY</i> | 1.00 | 0.98 | 1.12 | 0.20 |
| BSU01370 | <i>adk</i>  | 1.08 | 0.70 | 0.92 | 0.03 |
| BSU01380 | <i>mapA</i> | 1.03 | 0.98 | 0.84 | 0.05 |
| BSU01389 | <i>ybzG</i> | 0.86 | 0.51 | 0.90 | 0.35 |
| BSU01390 | <i>infA</i> | 0.98 | 0.93 | 1.05 | 0.31 |
| BSU01400 | <i>rpmJ</i> | 1.07 | 0.71 | 1.03 | 0.43 |
| BSU01410 | <i>rpsM</i> | 0.96 | 0.84 | 0.86 | 0.04 |
| BSU01420 | <i>rpsK</i> | 0.81 | 0.34 | 0.75 | 0.06 |
| BSU01430 | <i>rpoA</i> | 0.92 | 0.66 | 1.01 | 0.99 |
| BSU01440 | <i>rplQ</i> | 1.57 | 0.16 | 1.56 | 0.00 |

|          |              |      |      |      |      |
|----------|--------------|------|------|------|------|
| BSU01450 | <i>cbiO</i>  | 0.91 | 0.54 | 2.15 | 0.00 |
| BSU01460 | <i>cbiO</i>  | 1.08 | 0.70 | 1.03 | 0.91 |
| BSU01470 | <i>ybaF</i>  | 0.99 | 0.94 | 0.90 | 0.14 |
| BSU01480 | <i>truA</i>  | 0.69 | 0.07 | 0.28 | 0.00 |
| BSU01490 | <i>rplM</i>  | 0.87 | 0.12 | 1.17 | 0.05 |
| BSU01500 | <i>rpsI</i>  | 1.65 | 0.01 | 1.92 | 0.00 |
| BSU01510 | <i>ybaJ</i>  | 0.93 | 0.46 | 1.14 | 0.66 |
| BSU01540 | <i>salA</i>  | 0.76 | 0.10 | 0.79 | 0.11 |
| BSU01550 | <i>gerD</i>  | 0.29 | 0.01 | 0.23 | 0.02 |
| BSU01560 | <i>kbaA</i>  | 0.66 | 0.09 | 1.12 | 0.65 |
| BSU01570 | <i>ybaN</i>  | 0.24 | 0.00 | 1.05 | 0.81 |
| BSU01580 | <i>ybaR</i>  | 0.57 | 0.00 | 0.86 | 0.01 |
| BSU01590 | <i>ybaS</i>  | 0.60 | 0.00 | 0.98 | 0.88 |
| BSU01600 | <i>ybbA</i>  | 1.08 | 0.65 | 1.30 | 0.01 |
| BSU01610 | <i>feuC</i>  | 1.11 | 0.50 | 1.18 | 0.06 |
| BSU01620 | <i>feuB</i>  | 1.92 | 0.01 | 1.17 | 0.08 |
| BSU01630 | <i>feuA</i>  | 0.87 | 0.10 | 0.91 | 0.56 |
| BSU01640 | <i>ybbB</i>  | 0.74 | 0.03 | 0.72 | 0.01 |
| BSU01700 | <i>murQ</i>  | 0.98 | 0.61 | 0.75 | 0.12 |
| BSU01730 | <i>sigW</i>  | 0.86 | 0.19 | 1.03 | 0.99 |
| BSU01740 | <i>rsiW</i>  | 1.17 | 0.09 | 1.30 | 0.12 |
| BSU01750 | <i>ybbP</i>  | 0.52 | 0.02 | 0.48 | 0.00 |
| BSU01760 | <i>ybbR</i>  | 1.06 | 0.73 | 1.09 | 0.10 |
| BSU01770 | <i>glmM</i>  | 0.60 | 0.03 | 0.79 | 0.03 |
| BSU01780 | <i>glmS</i>  | 0.43 | 0.07 | 0.33 | 0.01 |
| BSU01910 | <i>skfA</i>  | 1.27 | 0.41 | 1.08 | 0.68 |
| BSU02019 | <i>ybzI</i>  | 1.42 | 0.03 | 1.52 | 0.14 |
| BSU02060 | <i>ybxG</i>  | 0.31 | 0.00 | 0.38 | 0.00 |
| BSU02100 | <i>cypC</i>  | 0.44 | 0.00 | 0.45 | 0.01 |
| BSU02110 | <i>ybyB</i>  | 1.16 | 0.10 | 1.33 | 0.07 |
| BSU02120 | <i>ybeC</i>  | 0.57 | 0.00 | 0.88 | 0.07 |
| BSU02130 | <i>glpQ</i>  | 0.79 | 0.03 | 1.15 | 0.33 |
| BSU02140 | <i>glpT</i>  | 1.12 | 0.30 | 1.15 | 0.35 |
| BSU02180 | <i>ybfE</i>  | 2.28 | 0.11 | 2.20 | 0.21 |
| BSU02190 | <i>ybfF</i>  | 0.95 | 0.75 | 1.69 | 0.52 |
| BSU02200 | <i>ybfG</i>  | 0.86 | 0.03 | 0.92 | 0.30 |
| BSU02230 | <i>purT</i>  | 0.86 | 0.08 | 0.97 | 0.89 |
| BSU02260 | <i>ybfK</i>  | 0.79 | 0.05 | 0.73 | 0.02 |
| BSU02270 | <i>pssA</i>  | 0.66 | 0.00 | 0.82 | 0.11 |
| BSU02280 | <i>ybfM</i>  | 1.16 | 0.12 | 1.15 | 0.40 |
| BSU02290 | <i>psd</i>   | 0.81 | 0.20 | 0.82 | 0.01 |
| BSU02300 | <i>ybfN</i>  | 1.44 | 0.00 | 1.34 | 0.02 |
| BSU02310 | <i>ybfO</i>  | 1.15 | 0.28 | 1.62 | 0.00 |
| BSU02330 | <i>ybfQ</i>  | 0.85 | 0.14 | 0.70 | 0.12 |
| BSU02350 | <i>nagP</i>  | 0.72 | 0.09 | 0.88 | 0.24 |
| BSU02360 | <i>nagBB</i> | 1.18 | 0.50 | 1.29 | 0.02 |
| BSU02380 | <i>ybgB</i>  | 1.48 | 0.03 | 1.54 | 0.04 |

|          |              |      |      |      |      |
|----------|--------------|------|------|------|------|
| BSU02500 | <i>ycbG</i>  | 0.64 | 0.00 | 0.84 | 0.04 |
| BSU02520 | <i>ycbJ</i>  | 0.79 | 0.06 | 0.94 | 0.76 |
| BSU02530 | <i>rtpA</i>  | 0.77 | 0.19 | 0.66 | 0.03 |
| BSU02590 | <i>ycbP</i>  | 0.83 | 0.16 | 0.79 | 0.05 |
| BSU02670 | <i>lmrB</i>  | 0.35 | 0.00 | 0.48 | 0.00 |
| BSU02720 | <i>yccF</i>  | 0.49 | 0.00 | 0.70 | 0.00 |
| BSU02770 | <i>yccK</i>  | 0.55 | 0.00 | 0.83 | 0.30 |
| BSU02820 | <i>rapJ</i>  | 0.71 | 0.14 | 0.73 | 0.07 |
| BSU02830 | <i>ycdF</i>  | 0.91 | 0.53 | 0.87 | 0.47 |
| BSU02840 | <i>ycdG</i>  | 0.65 | 0.00 | 0.94 | 0.68 |
| BSU02850 | <i>adcA</i>  | 0.21 | 0.00 | 0.86 | 0.10 |
| BSU02890 | <i>yceC</i>  | 0.96 | 0.57 | 0.96 | 0.68 |
| BSU02900 | <i>yceD</i>  | 1.00 | 0.98 | 0.97 | 0.89 |
| BSU02910 | <i>yceE</i>  | 1.17 | 0.11 | 1.35 | 0.17 |
| BSU02920 | <i>yceF</i>  | 0.89 | 0.18 | 0.91 | 0.39 |
| BSU02930 | <i>yceG</i>  | 1.01 | 1.00 | 1.10 | 0.22 |
| BSU02940 | <i>yceH</i>  | 1.08 | 0.70 | 1.00 | 0.81 |
| BSU02950 | <i>yceI</i>  | 0.63 | 0.01 | 0.81 | 0.35 |
| BSU02980 | <i>opuAA</i> | 0.48 | 0.00 | 0.97 | 0.77 |
| BSU02990 | <i>opuAB</i> | 0.65 | 0.01 | 0.78 | 0.01 |
| BSU03000 | <i>opuAC</i> | 0.92 | 0.28 | 1.00 | 0.82 |
| BSU03040 | <i>amyE</i>  | 0.23 | 0.01 | 0.57 | 0.01 |
| BSU03050 | <i>ldh</i>   | 0.90 | 0.55 | 0.69 | 0.05 |
| BSU03060 | <i>lctP</i>  | 0.99 | 0.87 | 1.05 | 0.92 |
| BSU03070 | <i>mdr</i>   | 0.54 | 0.00 | 0.74 | 0.02 |
| BSU03130 | <i>nadE</i>  | 0.55 | 0.00 | 0.67 | 0.00 |
| BSU03150 | <i>aroK</i>  | 0.60 | 0.01 | 0.75 | 0.23 |
| BSU03220 | <i>ycgO</i>  | 2.17 | 0.00 | 2.29 | 0.00 |
| BSU03240 | <i>ycgQ</i>  | 0.58 | 0.01 | 1.13 | 0.18 |
| BSU03270 | <i>ycgT</i>  | 0.37 | 0.00 | 0.50 | 0.01 |
| BSU03280 | <i>nasF</i>  | 0.76 | 0.02 | 0.84 | 0.07 |
| BSU03290 | <i>nasE</i>  | 0.55 | 0.04 | 0.43 | 0.00 |
| BSU03300 | <i>nasD</i>  | 0.94 | 0.63 | 0.66 | 0.03 |
| BSU03370 | <i>yckA</i>  | 1.59 | 0.01 | 1.58 | 0.00 |
| BSU03380 | <i>yckB</i>  | 0.46 | 0.00 | 0.72 | 0.04 |
| BSU03420 | <i>nin</i>   | 1.52 | 0.00 | 1.86 | 0.00 |
| BSU03430 | <i>nucA</i>  | 0.92 | 0.23 | 1.13 | 0.05 |
| BSU03450 | <i>hxlB</i>  | 1.20 | 0.37 | 1.42 | 0.06 |
| BSU03460 | <i>hxlA</i>  | 0.81 | 0.15 | 0.86 | 0.06 |
| BSU03480 | <i>srfAA</i> | 0.25 | 0.02 | 0.21 | 0.01 |
| BSU03490 | <i>srfAB</i> | 0.94 | 0.81 | 0.97 | 0.81 |
| BSU03500 | <i>comS</i>  | 1.12 | 0.61 | 1.17 | 0.10 |
| BSU03510 | <i>srfAC</i> | 0.93 | 0.73 | 0.91 | 0.45 |
| BSU03520 | <i>srfAD</i> | 1.16 | 0.43 | 1.27 | 0.12 |
| BSU03580 | <i>yczE</i>  | 0.73 | 0.16 | 0.82 | 0.39 |
| BSU03590 | <i>tcyC</i>  | 1.23 | 0.64 | 1.05 | 0.97 |
| BSU03600 | <i>tcyB</i>  | 1.36 | 0.00 | 1.22 | 0.00 |

|          |             |      |      |      |      |
|----------|-------------|------|------|------|------|
| BSU03610 | <i>tcyA</i> | 0.85 | 0.06 | 0.95 | 0.55 |
| BSU03670 | <i>dtpT</i> | 0.28 | 0.00 | 0.46 | 0.00 |
| BSU03760 | <i>yclK</i> | 0.93 | 0.32 | 0.75 | 0.03 |
| BSU03770 | <i>rapC</i> | 0.29 | 0.00 | 0.82 | 0.47 |
| BSU03780 | <i>phrC</i> | 1.82 | 0.13 | 1.66 | 0.11 |
| BSU03789 | <i>yczN</i> | 0.34 | 0.01 | 0.37 | 0.02 |
| BSU03800 | <i>yclN</i> | 0.72 | 0.02 | 0.78 | 0.09 |
| BSU03810 | <i>yclO</i> | 1.06 | 0.20 | 1.24 | 0.11 |
| BSU03820 | <i>yclP</i> | 0.90 | 0.33 | 1.05 | 0.66 |
| BSU03830 | <i>yclQ</i> | 0.76 | 0.01 | 1.47 | 0.01 |
| BSU03840 | <i>ycnB</i> | 0.63 | 0.16 | 0.61 | 0.08 |
| BSU03850 | <i>ycnC</i> | 1.17 | 0.18 | 1.20 | 0.02 |
| BSU03860 | <i>ycnD</i> | 0.90 | 0.29 | 0.90 | 0.16 |
| BSU03870 | <i>ycnE</i> | 0.81 | 0.10 | 0.66 | 0.01 |
| BSU03880 | <i>yczG</i> | 1.04 | 0.84 | 1.06 | 0.08 |
| BSU03910 | <i>gabD</i> | 0.49 | 0.02 | 0.56 | 0.00 |
| BSU03940 | <i>ycnI</i> | 1.11 | 0.89 | 1.06 | 0.94 |
| BSU03950 | <i>ycnJ</i> | 0.55 | 0.05 | 0.76 | 0.01 |
| BSU03960 | <i>ycnK</i> | 0.98 | 0.85 | 1.51 | 0.02 |
| BSU03970 | <i>ycnL</i> | 1.00 | 1.00 | 0.95 | 0.70 |
| BSU03981 | <i>mtIA</i> | 0.87 | 0.01 | 0.53 | 0.01 |
| BSU03982 | <i>mtIF</i> | 1.05 | 0.34 | 1.11 | 0.33 |
| BSU03990 | <i>mtID</i> | 1.05 | 0.45 | 1.42 | 0.15 |
| BSU04000 | <i>ycsA</i> | 1.02 | 0.88 | 1.16 | 0.17 |
| BSU04010 | <i>sipU</i> | 0.96 | 0.72 | 1.08 | 0.72 |
| BSU04020 | <i>yczH</i> | 1.15 | 0.16 | 1.18 | 0.20 |
| BSU04030 | <i>ycsD</i> | 1.57 | 0.01 | 1.48 | 0.01 |
| BSU04039 | <i>yczO</i> | 1.05 | 0.83 | 1.04 | 0.79 |
| BSU04040 | <i>ycsE</i> | 0.78 | 0.14 | 0.96 | 0.69 |
| BSU04050 | <i>ycsF</i> | 0.99 | 1.00 | 0.64 | 0.06 |
| BSU04060 | <i>ycsG</i> | 0.63 | 0.11 | 0.72 | 0.03 |
| BSU04070 | <i>ycsI</i> | 1.01 | 0.86 | 0.89 | 0.53 |
| BSU04080 | <i>kipI</i> | 0.96 | 0.72 | 1.11 | 0.62 |
| BSU04090 | <i>kipA</i> | 1.06 | 0.86 | 1.04 | 0.81 |
| BSU04100 | <i>kipR</i> | 1.10 | 0.67 | 1.21 | 0.37 |
| BSU04110 | <i>lipC</i> | 1.47 | 0.01 | 2.18 | 0.01 |
| BSU04120 | <i>yczI</i> | 1.04 | 0.65 | 2.24 | 0.09 |
| BSU04130 | <i>yczJ</i> | 0.33 | 0.00 | 0.46 | 0.00 |
| BSU04140 | <i>pbpC</i> | 0.69 | 0.04 | 0.80 | 0.14 |
| BSU04150 | <i>ycsN</i> | 1.14 | 0.50 | 1.17 | 0.24 |
| BSU04160 | <i>mtIR</i> | 0.61 | 0.00 | 0.48 | 0.00 |
| BSU04190 | <i>ydaD</i> | 0.59 | 0.02 | 0.63 | 0.14 |
| BSU04200 | <i>ydaE</i> | 1.14 | 0.09 | 1.52 | 0.15 |
| BSU04220 | <i>ydaG</i> | 0.80 | 0.47 | 0.83 | 0.39 |
| BSU04240 | <i>ydzA</i> | 0.77 | 0.13 | 0.95 | 0.82 |
| BSU04260 | <i>topB</i> | 0.58 | 0.02 | 0.65 | 0.02 |
| BSU04270 | <i>ydaJ</i> | 0.80 | 0.01 | 1.89 | 0.00 |

|          |              |      |      |      |      |
|----------|--------------|------|------|------|------|
| BSU04320 | <i>ydaO</i>  | 0.69 | 0.03 | 0.69 | 0.01 |
| BSU04340 | <i>ydaP</i>  | 0.99 | 0.52 | 1.02 | 0.99 |
| BSU04359 | <i>ydzK</i>  | 0.65 | 0.00 | 0.65 | 0.02 |
| BSU04360 | <i>mntH</i>  | 0.48 | 0.01 | 0.57 | 0.04 |
| BSU04370 | <i>ydaS</i>  | 0.88 | 0.49 | 0.80 | 0.17 |
| BSU04400 | <i>gsiB</i>  | 0.94 | 0.53 | 0.98 | 0.83 |
| BSU04430 | <i>ydbD</i>  | 1.28 | 0.19 | 1.24 | 0.10 |
| BSU04440 | <i>dctB</i>  | 1.85 | 0.00 | 3.64 | 0.00 |
| BSU04470 | <i>dctP</i>  | 0.48 | 0.06 | 0.72 | 0.06 |
| BSU04480 | <i>ydbI</i>  | 0.43 | 0.00 | 0.69 | 0.03 |
| BSU04490 | <i>ydbJ</i>  | 0.66 | 0.00 | 0.75 | 0.01 |
| BSU04500 | <i>ydbK</i>  | 0.80 | 0.02 | 0.83 | 0.22 |
| BSU04510 | <i>ydbL</i>  | 1.12 | 0.36 | 1.62 | 0.00 |
| BSU04520 | <i>ydbM</i>  | 0.61 | 0.04 | 0.41 | 0.02 |
| BSU04530 | <i>ydbN</i>  | 1.67 | 0.02 | 1.71 | 0.00 |
| BSU04540 | <i>ydbO</i>  | 0.06 | 0.00 | 0.07 | 0.00 |
| BSU04550 | <i>ydbP</i>  | 0.85 | 0.02 | 0.78 | 0.31 |
| BSU04560 | <i>ddl</i>   | 0.50 | 0.01 | 0.54 | 0.01 |
| BSU04570 | <i>murF</i>  | 0.62 | 0.00 | 0.78 | 0.01 |
| BSU04580 | <i>cshA</i>  | 0.55 | 0.01 | 0.57 | 0.01 |
| BSU04590 | <i>ydbS</i>  | 0.74 | 0.01 | 0.85 | 0.08 |
| BSU04600 | <i>ydbT</i>  | 1.10 | 0.43 | 1.18 | 0.02 |
| BSU04610 | <i>ydcA</i>  | 0.95 | 0.40 | 1.23 | 0.02 |
| BSU04620 | <i>acpS</i>  | 0.64 | 0.00 | 0.70 | 0.03 |
| BSU04630 | <i>ydcC</i>  | 1.27 | 0.05 | 1.33 | 0.03 |
| BSU04640 | <i>alrA</i>  | 0.61 | 0.00 | 0.50 | 0.00 |
| BSU04650 | <i>endB</i>  | 0.88 | 0.28 | 0.97 | 0.85 |
| BSU04660 | <i>ndoA</i>  | 1.26 | 0.01 | 2.12 | 0.00 |
| BSU04670 | <i>rsbRA</i> | 0.43 | 0.00 | 0.53 | 0.00 |
| BSU04680 | <i>rsbS</i>  | 1.18 | 0.49 | 0.84 | 0.25 |
| BSU04690 | <i>rsbT</i>  | 0.78 | 0.09 | 0.90 | 0.10 |
| BSU04700 | <i>rsbU</i>  | 0.99 | 0.93 | 0.85 | 0.22 |
| BSU04710 | <i>rsbV</i>  | 0.61 | 0.00 | 0.44 | 0.00 |
| BSU04720 | <i>rsbW</i>  | 0.98 | 0.80 | 1.05 | 0.70 |
| BSU04730 | <i>sigB</i>  | 1.20 | 0.02 | 0.74 | 0.04 |
| BSU04740 | <i>rsbX</i>  | 1.63 | 0.02 | 2.29 | 0.00 |
| BSU04780 | <i>ydcl</i>  | 0.31 | 0.01 | 0.45 | 0.00 |
| BSU04790 | <i>ydck</i>  | 2.17 | 0.03 | 1.67 | 0.13 |
| BSU05000 | <i>yddK</i>  | 0.45 | 0.05 | 0.59 | 0.42 |
| BSU05020 | <i>phrI</i>  | 1.56 | 0.03 | 1.29 | 0.54 |
| BSU05070 | <i>yddQ</i>  | 0.79 | 0.09 | 1.21 | 0.41 |
| BSU05099 | <i>ydzM</i>  | 0.68 | 0.05 | 0.62 | 0.23 |
| BSU05120 | <i>cspC</i>  | 3.29 | 0.06 | 3.77 | 0.02 |
| BSU05130 | <i>ydeB</i>  | 1.44 | 0.09 | 1.25 | 0.64 |
| BSU05260 | <i>ydeN</i>  | 1.13 | 0.10 | 1.18 | 0.47 |
| BSU05270 | <i>ydzF</i>  | 0.90 | 0.12 | 1.07 | 0.79 |
| BSU05280 | <i>ydeO</i>  | 0.58 | 0.01 | 0.99 | 0.69 |



|          |              |      |      |      |      |
|----------|--------------|------|------|------|------|
| BSU05320 | <i>ydeS</i>  | 0.64 | 0.02 | 0.71 | 0.05 |
| BSU05329 | <i>ydzO</i>  | 1.73 | 0.12 | 2.17 | 0.01 |
| BSU05340 | <i>ydfA</i>  | 0.45 | 0.00 | 0.73 | 0.00 |
| BSU05400 | <i>ydfG</i>  | 1.30 | 0.07 | 1.57 | 0.01 |
| BSU05440 | <i>nap</i>   | 0.69 | 0.02 | 0.80 | 0.03 |
| BSU05529 | <i>ydzR</i>  | 0.56 | 0.00 | 0.85 | 0.26 |
| BSU05580 | <i>ydgC</i>  | 0.84 | 0.31 | 0.77 | 0.07 |
| BSU05590 | <i>ydgD</i>  | 0.96 | 0.75 | 0.86 | 0.01 |
| BSU05600 | <i>ydgE</i>  | 0.95 | 0.59 | 1.17 | 0.05 |
| BSU05620 | <i>ydgF</i>  | 0.35 | 0.00 | 0.34 | 0.00 |
| BSU05630 | <i>dinB</i>  | 1.68 | 0.01 | 6.18 | 0.01 |
| BSU05660 | <i>ydgl</i>  | 1.62 | 0.03 | 1.44 | 0.02 |
| BSU05670 | <i>ydgl</i>  | 0.68 | 0.02 | 1.29 | 0.11 |
| BSU05680 | <i>ydgK</i>  | 0.35 | 0.00 | 0.71 | 0.02 |
| BSU05700 | <i>ydhC</i>  | 0.45 | 0.00 | 0.69 | 0.04 |
| BSU05720 | <i>ydhE</i>  | 0.70 | 0.00 | 0.80 | 0.12 |
| BSU05750 | <i>ydhG</i>  | 1.39 | 0.03 | 1.23 | 0.27 |
| BSU05790 | <i>ydhK</i>  | 1.01 | 0.94 | 1.42 | 0.03 |
| BSU05800 | <i>pbuE</i>  | 0.35 | 0.00 | 0.46 | 0.00 |
| BSU05810 | <i>gmuB</i>  | 0.52 | 0.00 | 0.54 | 0.02 |
| BSU05820 | <i>gmuA</i>  | 0.83 | 0.38 | 1.14 | 0.66 |
| BSU05830 | <i>gmuC</i>  | 1.12 | 0.21 | 1.17 | 0.19 |
| BSU05840 | <i>gmuD</i>  | 0.91 | 0.37 | 1.12 | 0.31 |
| BSU05850 | <i>gmuR</i>  | 0.97 | 0.50 | 0.80 | 0.24 |
| BSU05860 | <i>gmuE</i>  | 1.17 | 0.07 | 1.47 | 0.03 |
| BSU05870 | <i>gmuF</i>  | 0.81 | 0.06 | 1.20 | 0.21 |
| BSU05880 | <i>gmuG</i>  | 0.76 | 0.00 | 1.04 | 0.78 |
| BSU05900 | <i>thiL</i>  | 0.80 | 0.09 | 0.92 | 0.36 |
| BSU05910 | <i>ydiB</i>  | 0.84 | 0.29 | 0.93 | 0.42 |
| BSU05920 | <i>ydiC</i>  | 0.73 | 0.03 | 0.76 | 0.02 |
| BSU05930 | <i>rimI</i>  | 0.99 | 0.93 | 0.96 | 0.87 |
| BSU05940 | <i>gcp</i>   | 0.88 | 0.18 | 1.13 | 0.43 |
| BSU05950 | <i>ydiF</i>  | 0.40 | 0.01 | 0.69 | 0.02 |
| BSU05960 | <i>moaC</i>  | 0.70 | 0.02 | 0.83 | 0.01 |
| BSU05970 | <i>ydiH</i>  | 0.40 | 0.00 | 0.82 | 0.08 |
| BSU05980 | <i>tatAY</i> | 0.86 | 0.08 | 0.86 | 0.08 |
| BSU05990 | <i>tatCY</i> | 1.35 | 0.10 | 1.54 | 0.01 |
| BSU06000 | <i>ydiK</i>  | 1.77 | 0.03 | 2.25 | 0.00 |
| BSU06010 | <i>ydiL</i>  | 0.56 | 0.00 | 0.92 | 0.37 |
| BSU06020 | <i>groES</i> | 0.75 | 0.00 | 1.68 | 0.01 |
| BSU06030 | <i>groEL</i> | 0.90 | 0.24 | 0.76 | 0.08 |
| BSU06040 | <i>ydiM</i>  | 0.85 | 0.35 | 1.13 | 0.82 |
| BSU06060 | <i>ydiO</i>  | 0.56 | 0.01 | 0.55 | 0.14 |
| BSU06070 | <i>ydiP</i>  | 0.64 | 0.00 | 0.87 | 0.52 |
| BSU06090 | <i>ydiR</i>  | 0.43 | 0.00 | 0.42 | 0.09 |
| BSU06100 | <i>ydiS</i>  | 0.82 | 0.25 | 0.78 | 0.67 |
| BSU06110 | <i>ydjA</i>  | 1.04 | 1.00 | 1.28 | 0.82 |

|          |             |      |      |      |      |
|----------|-------------|------|------|------|------|
| BSU06170 | <i>ydjE</i> | 0.73 | 0.00 | 0.66 | 0.00 |
| BSU06180 | <i>pspA</i> | 0.54 | 0.00 | 0.58 | 0.01 |
| BSU06190 | <i>ydjG</i> | 0.87 | 0.03 | 0.82 | 0.11 |
| BSU06200 | <i>ydjH</i> | 1.12 | 0.20 | 0.98 | 0.87 |
| BSU06210 | <i>ydjI</i> | 0.87 | 0.26 | 1.13 | 0.36 |
| BSU06240 | <i>bdhA</i> | 1.13 | 0.35 | 1.13 | 0.39 |
| BSU06250 | <i>ydjM</i> | 0.61 | 0.00 | 0.57 | 0.06 |
| BSU06270 | <i>ydjO</i> | 0.87 | 0.11 | 1.08 | 0.47 |
| BSU06280 | <i>ydjP</i> | 1.21 | 0.05 | 0.99 | 0.92 |
| BSU06290 | <i>yeaA</i> | 0.62 | 0.06 | 0.46 | 0.01 |
| BSU06340 | <i>yeaD</i> | 0.86 | 0.18 | 0.70 | 0.11 |
| BSU06350 | <i>yebA</i> | 0.63 | 0.00 | 0.88 | 0.03 |
| BSU06360 | <i>guaA</i> | 0.41 | 0.01 | 0.53 | 0.02 |
| BSU06370 | <i>pbuG</i> | 0.47 | 0.06 | 0.68 | 0.05 |
| BSU06380 | <i>yebC</i> | 1.42 | 0.05 | 1.37 | 0.07 |
| BSU06390 | <i>yebD</i> | 1.05 | 0.86 | 1.35 | 0.28 |
| BSU06400 | <i>yebE</i> | 0.77 | 0.06 | 0.86 | 0.06 |
| BSU06410 | <i>yebG</i> | 1.03 | 0.85 | 1.03 | 0.80 |
| BSU06420 | <i>purE</i> | 0.69 | 0.14 | 0.67 | 0.10 |
| BSU06430 | <i>purK</i> | 0.77 | 0.25 | 0.97 | 0.73 |
| BSU06440 | <i>purB</i> | 0.81 | 0.32 | 0.99 | 0.92 |
| BSU06450 | <i>purC</i> | 0.91 | 0.61 | 0.93 | 0.35 |
| BSU06460 | <i>purS</i> | 0.97 | 0.88 | 0.97 | 0.77 |
| BSU06470 | <i>purQ</i> | 1.01 | 0.97 | 0.92 | 0.50 |
| BSU06480 | <i>purL</i> | 1.01 | 0.97 | 1.24 | 0.40 |
| BSU06490 | <i>purF</i> | 0.80 | 0.59 | 0.83 | 0.35 |
| BSU06510 | <i>purN</i> | 1.04 | 0.89 | 0.99 | 0.99 |
| BSU06560 | <i>yerA</i> | 1.09 | 0.67 | 0.69 | 0.01 |
| BSU06570 | <i>yerB</i> | 0.63 | 0.06 | 1.80 | 0.00 |
| BSU06580 | <i>yerC</i> | 1.93 | 0.01 | 2.77 | 0.00 |
| BSU06590 | <i>yerD</i> | 1.12 | 0.69 | 0.63 | 0.00 |
| BSU06610 | <i>pcrA</i> | 0.35 | 0.00 | 0.44 | 0.00 |
| BSU06620 | <i>ligA</i> | 0.70 | 0.03 | 0.77 | 0.12 |
| BSU06630 | <i>yerH</i> | 0.63 | 0.00 | 0.95 | 0.66 |
| BSU06640 | <i>yerI</i> | 0.79 | 0.01 | 0.90 | 0.24 |
| BSU06660 | <i>opuE</i> | 1.25 | 0.34 | 5.36 | 0.00 |
| BSU06670 | <i>gatC</i> | 0.76 | 0.00 | 0.80 | 0.01 |
| BSU06680 | <i>gatA</i> | 0.48 | 0.02 | 0.51 | 0.00 |
| BSU06690 | <i>gatB</i> | 0.77 | 0.07 | 1.08 | 0.35 |
| BSU06710 | <i>swrC</i> | 0.27 | 0.00 | 0.59 | 0.03 |
| BSU06720 | <i>yerQ</i> | 0.70 | 0.03 | 1.09 | 0.50 |
| BSU06730 | <i>yefA</i> | 0.50 | 0.02 | 0.73 | 0.19 |
| BSU06770 | <i>yeeB</i> | 0.97 | 0.75 | 0.78 | 0.41 |
| BSU06780 | <i>yeeC</i> | 1.24 | 0.18 | 1.07 | 0.81 |
| BSU06790 | <i>yeeD</i> | 0.67 | 0.15 | 0.49 | 0.07 |
| BSU06800 | <i>yezA</i> | 0.93 | 0.91 | 1.05 | 0.77 |
| BSU06811 | <i>yezG</i> | 1.42 | 0.16 | 1.05 | 0.98 |

|          |              |      |      |      |      |
|----------|--------------|------|------|------|------|
| BSU06840 | <i>yeel</i>  | 0.57 | 0.00 | 0.67 | 0.04 |
| BSU06860 | <i>yezE</i>  | 1.19 | 0.20 | 1.23 | 0.09 |
| BSU06920 | <i>yesJ</i>  | 1.16 | 0.34 | 1.34 | 0.15 |
| BSU06930 | <i>yesK</i>  | 1.02 | 0.88 | 0.98 | 0.81 |
| BSU07150 | <i>yetG</i>  | 0.67 | 0.01 | 0.52 | 0.01 |
| BSU07160 | <i>yetH</i>  | 0.78 | 0.03 | 0.99 | 0.72 |
| BSU07200 | <i>yetI</i>  | 0.91 | 0.58 | 1.16 | 0.28 |
| BSU07210 | <i>yetK</i>  | 1.18 | 0.57 | 1.25 | 0.09 |
| BSU07260 | <i>ltaSA</i> | 0.31 | 0.00 | 0.71 | 0.04 |
| BSU07320 | <i>yfnC</i>  | 0.71 | 0.14 | 1.20 | 0.34 |
| BSU07350 | <i>yfmT</i>  | 0.93 | 0.62 | 0.61 | 0.04 |
| BSU07360 | <i>yfmS</i>  | 1.01 | 0.93 | 0.96 | 0.52 |
| BSU07370 | <i>yfmR</i>  | 0.24 | 0.00 | 0.35 | 0.00 |
| BSU07380 | <i>yfmQ</i>  | 1.00 | 1.00 | 1.46 | 0.01 |
| BSU07390 | <i>yfmP</i>  | 1.29 | 0.32 | 1.46 | 0.01 |
| BSU07420 | <i>yfmM</i>  | 0.46 | 0.01 | 0.52 | 0.02 |
| BSU07430 | <i>yfmL</i>  | 0.59 | 0.01 | 0.57 | 0.01 |
| BSU07450 | <i>yfmJ</i>  | 0.58 | 0.00 | 0.87 | 0.10 |
| BSU07490 | <i>yfmF</i>  | 0.56 | 0.00 | 0.74 | 0.04 |
| BSU07500 | <i>yfmE</i>  | 0.62 | 0.01 | 0.25 | 0.00 |
| BSU07510 | <i>yfmD</i>  | 0.70 | 0.01 | 0.89 | 0.21 |
| BSU07520 | <i>yfmC</i>  | 0.65 | 0.01 | 1.13 | 0.25 |
| BSU07550 | <i>yfIT</i>  | 1.01 | 0.91 | 1.28 | 0.15 |
| BSU07560 | <i>pel</i>   | 0.72 | 0.00 | 1.10 | 0.32 |
| BSU07640 | <i>yfIL</i>  | 0.71 | 0.05 | 0.81 | 0.08 |
| BSU07650 | <i>yfIK</i>  | 0.64 | 0.03 | 1.11 | 0.41 |
| BSU07660 | <i>yfIJ</i>  | 1.68 | 0.01 | 2.11 | 0.02 |
| BSU07670 | <i>yfII</i>  | 0.53 | 0.02 | 0.58 | 0.04 |
| BSU07680 | <i>yfIH</i>  | 1.74 | 0.01 | 1.81 | 0.03 |
| BSU07690 | <i>yfIG</i>  | 0.42 | 0.00 | 0.42 | 0.01 |
| BSU07700 | <i>nagP</i>  | 0.31 | 0.00 | 0.46 | 0.00 |
| BSU07710 | <i>yfIE</i>  | 0.51 | 0.00 | 0.80 | 0.06 |
| BSU07750 | <i>yfIA</i>  | 0.70 | 0.00 | 0.65 | 0.04 |
| BSU07760 | <i>yfkT</i>  | 0.60 | 0.00 | 0.88 | 0.41 |
| BSU07770 | <i>yfkS</i>  | 0.62 | 0.01 | 0.90 | 0.44 |
| BSU07800 | <i>treP</i>  | 0.54 | 0.03 | 0.77 | 0.14 |
| BSU07810 | <i>treA</i>  | 0.60 | 0.00 | 0.70 | 0.03 |
| BSU07820 | <i>treR</i>  | 1.01 | 0.93 | 1.19 | 0.23 |
| BSU07830 | <i>yfkO</i>  | 0.99 | 0.76 | 1.17 | 0.38 |
| BSU07850 | <i>yfkM</i>  | 1.20 | 0.17 | 1.35 | 0.12 |
| BSU07870 | <i>yfkK</i>  | 1.09 | 0.60 | 0.95 | 0.66 |
| BSU07880 | <i>yfkJ</i>  | 0.76 | 0.01 | 0.77 | 0.10 |
| BSU07890 | <i>yfkI</i>  | 0.86 | 0.16 | 0.98 | 0.86 |
| BSU07900 | <i>yfkH</i>  | 0.99 | 0.84 | 1.11 | 0.39 |
| BSU07920 | <i>yfkE</i>  | 0.51 | 0.00 | 0.42 | 0.03 |
| BSU07930 | <i>yfkD</i>  | 1.04 | 0.63 | 1.09 | 0.47 |
| BSU07940 | <i>yfkC</i>  | 0.58 | 0.01 | 0.81 | 0.13 |

|          |              |      |      |      |      |
|----------|--------------|------|------|------|------|
| BSU07955 | <i>yfkA</i>  | 0.54 | 0.01 | 0.73 | 0.01 |
| BSU08000 | <i>yfjQ</i>  | 1.18 | 0.03 | 1.05 | 0.70 |
| BSU08020 | <i>yfjO</i>  | 0.36 | 0.01 | 0.45 | 0.00 |
| BSU08030 | <i>dusC</i>  | 0.30 | 0.00 | 0.47 | 0.00 |
| BSU08120 | <i>yjfF</i>  | 1.58 | 0.12 | 1.16 | 0.50 |
| BSU08180 | <i>malA</i>  | 0.78 | 0.01 | 0.82 | 0.26 |
| BSU08220 | <i>yfiC</i>  | 0.78 | 0.04 | 1.02 | 0.87 |
| BSU08340 | <i>padR</i>  | 0.65 | 0.03 | 0.76 | 0.05 |
| BSU08350 | <i>estB</i>  | 0.99 | 0.91 | 1.43 | 0.24 |
| BSU08390 | <i>yfiT</i>  | 0.84 | 0.08 | 1.03 | 0.96 |
| BSU08425 | <i>mprF</i>  | 0.43 | 0.00 | 0.70 | 0.01 |
| BSU08440 | <i>yfiY</i>  | 0.66 | 0.01 | 0.86 | 0.28 |
| BSU08450 | <i>yfiZ</i>  | 0.78 | 0.06 | 0.66 | 0.03 |
| BSU08460 | <i>yfhA</i>  | 1.01 | 0.93 | 1.23 | 0.31 |
| BSU08470 | <i>yfhB</i>  | 0.89 | 0.03 | 0.96 | 0.76 |
| BSU08480 | <i>yfhC</i>  | 1.28 | 0.07 | 1.31 | 0.07 |
| BSU08490 | <i>yfhD</i>  | 1.41 | 0.12 | 1.19 | 0.56 |
| BSU08500 | <i>yfhE</i>  | 1.06 | 0.45 | 1.29 | 0.72 |
| BSU08510 | <i>yfhF</i>  | 0.83 | 0.13 | 0.78 | 0.09 |
| BSU08520 | <i>recX</i>  | 0.57 | 0.00 | 0.93 | 0.24 |
| BSU08530 | <i>yfhH</i>  | 1.14 | 0.58 | 1.32 | 0.03 |
| BSU08560 | <i>yfhJ</i>  | 1.14 | 0.09 | 1.03 | 0.82 |
| BSU08570 | <i>yfhK</i>  | 0.99 | 0.90 | 0.97 | 0.55 |
| BSU08580 | <i>yfhL</i>  | 0.91 | 0.48 | 0.88 | 0.40 |
| BSU08590 | <i>yfhM</i>  | 2.35 | 0.00 | 1.99 | 0.00 |
| BSU08600 | <i>csbB</i>  | 0.77 | 0.09 | 0.84 | 0.49 |
| BSU08610 | <i>yfhO</i>  | 0.86 | 0.04 | 0.91 | 0.19 |
| BSU08620 | <i>yfhP</i>  | 0.49 | 0.00 | 0.93 | 0.36 |
| BSU08630 | <i>yfhQ</i>  | 0.47 | 0.00 | 0.37 | 0.00 |
| BSU08640 | <i>yfhS</i>  | 0.81 | 0.11 | 0.66 | 0.03 |
| BSU08650 | <i>fabL</i>  | 0.80 | 0.12 | 0.96 | 0.45 |
| BSU08660 | <i>sspE</i>  | 1.25 | 0.27 | 1.30 | 0.04 |
| BSU08680 | <i>ygaC</i>  | 1.01 | 0.86 | 1.28 | 0.11 |
| BSU08690 | <i>ygaD</i>  | 0.42 | 0.00 | 0.59 | 0.00 |
| BSU08700 | <i>ygaE</i>  | 0.84 | 0.05 | 4.28 | 0.00 |
| BSU08710 | <i>gsaB</i>  | 0.58 | 0.00 | 0.69 | 0.02 |
| BSU08720 | <i>ygaF</i>  | 0.42 | 0.01 | 0.66 | 0.14 |
| BSU08730 | <i>perR</i>  | 0.92 | 0.64 | 0.95 | 0.64 |
| BSU08740 | <i>ygzB</i>  | 0.95 | 0.60 | 1.09 | 0.56 |
| BSU08750 | <i>ygxA</i>  | 0.73 | 0.00 | 0.91 | 0.58 |
| BSU08760 | <i>spo0M</i> | 0.82 | 0.02 | 0.94 | 0.49 |
| BSU08820 | <i>katA</i>  | 0.76 | 0.26 | 0.89 | 0.33 |
| BSU08890 | <i>ygaO</i>  | 1.85 | 0.00 | 1.98 | 0.01 |
| BSU08899 | <i>ygzD</i>  | 0.59 | 0.03 | 0.49 | 0.00 |
| BSU08900 | <i>yhzB</i>  | 0.81 | 0.09 | 0.74 | 0.10 |
| BSU08930 | <i>cspR</i>  | 0.87 | 0.10 | 1.02 | 0.93 |
| BSU08990 | <i>yhbl</i>  | 0.83 | 0.15 | 0.79 | 0.04 |

|          |             |      |      |      |      |
|----------|-------------|------|------|------|------|
| BSU09000 | <i>yhbJ</i> | 0.76 | 0.02 | 1.06 | 0.80 |
| BSU09010 | <i>yhcA</i> | 0.64 | 0.06 | 0.76 | 0.00 |
| BSU09020 | <i>yhcB</i> | 0.93 | 0.67 | 0.93 | 0.54 |
| BSU09030 | <i>yhcC</i> | 1.53 | 0.07 | 1.79 | 0.02 |
| BSU09080 | <i>yhcH</i> | 0.55 | 0.01 | 0.75 | 0.08 |
| BSU09090 | <i>yhcI</i> | 0.98 | 0.73 | 1.05 | 0.78 |
| BSU09100 | <i>cspB</i> | 2.25 | 0.01 | 2.83 | 0.00 |
| BSU09110 | <i>yhcJ</i> | 0.76 | 0.04 | 0.98 | 0.61 |
| BSU09120 | <i>yhcK</i> | 0.87 | 0.08 | 1.88 | 0.03 |
| BSU09230 | <i>yhcV</i> | 1.62 | 0.04 | 1.70 | 0.02 |
| BSU09240 | <i>yhcW</i> | 0.43 | 0.00 | 0.41 | 0.01 |
| BSU09250 | <i>yhcX</i> | 0.53 | 0.00 | 0.94 | 0.55 |
| BSU09260 | <i>yhxA</i> | 0.53 | 0.01 | 0.60 | 0.00 |
| BSU09270 | <i>glpP</i> | 0.69 | 0.01 | 0.82 | 0.09 |
| BSU09280 | <i>glpF</i> | 1.05 | 0.71 | 1.01 | 0.98 |
| BSU09290 | <i>glpK</i> | 0.26 | 0.00 | 0.59 | 0.03 |
| BSU09300 | <i>glpD</i> | 0.65 | 0.30 | 0.62 | 0.00 |
| BSU09310 | <i>pgcA</i> | 0.35 | 0.00 | 0.93 | 0.31 |
| BSU09370 | <i>lytF</i> | 0.65 | 0.01 | 0.82 | 0.01 |
| BSU09380 | <i>nsrR</i> | 0.80 | 0.18 | 1.08 | 0.53 |
| BSU09420 | <i>lytE</i> | 0.26 | 0.00 | 0.42 | 0.00 |
| BSU09450 | <i>yhdF</i> | 1.19 | 0.13 | 1.47 | 0.10 |
| BSU09470 | <i>yhdH</i> | 1.02 | 0.93 | 1.50 | 0.03 |
| BSU09500 | <i>yhdK</i> | 1.69 | 0.01 | 2.48 | 0.00 |
| BSU09510 | <i>yhdL</i> | 0.39 | 0.00 | 0.63 | 0.02 |
| BSU09520 | <i>sigM</i> | 1.87 | 0.01 | 2.74 | 0.01 |
| BSU09530 | <i>yhdN</i> | 0.56 | 0.00 | 0.67 | 0.03 |
| BSU09540 | <i>plsC</i> | 0.66 | 0.01 | 0.88 | 0.21 |
| BSU09550 | <i>yhdP</i> | 0.61 | 0.00 | 0.85 | 0.12 |
| BSU09560 | <i>cueR</i> | 0.69 | 0.04 | 0.84 | 0.13 |
| BSU09570 | <i>yhdR</i> | 0.43 | 0.00 | 0.90 | 0.46 |
| BSU09590 | <i>yhdT</i> | 0.88 | 0.17 | 1.79 | 0.04 |
| BSU09640 | <i>yhdY</i> | 0.47 | 0.00 | 0.85 | 0.21 |
| BSU09650 | <i>yhdZ</i> | 0.81 | 0.06 | 0.72 | 0.05 |
| BSU09660 | <i>yheN</i> | 0.85 | 0.06 | 1.36 | 0.02 |
| BSU09670 | <i>dat</i>  | 0.69 | 0.01 | 1.88 | 0.05 |
| BSU09680 | <i>nhaC</i> | 1.25 | 0.00 | 1.55 | 0.00 |
| BSU09690 | <i>nhaX</i> | 1.06 | 0.74 | 1.43 | 0.03 |
| BSU09730 | <i>yheG</i> | 1.26 | 0.01 | 2.28 | 0.00 |
| BSU09750 | <i>sspB</i> | 1.48 | 0.04 | 1.86 | 0.02 |
| BSU09790 | <i>yheB</i> | 0.34 | 0.00 | 0.41 | 0.00 |
| BSU09800 | <i>yheA</i> | 1.22 | 0.02 | 1.35 | 0.19 |
| BSU09850 | <i>yhaU</i> | 0.88 | 0.25 | 0.99 | 0.77 |
| BSU09860 | <i>khtT</i> | 0.81 | 0.27 | 0.85 | 0.17 |
| BSU09870 | <i>khtS</i> | 0.91 | 0.47 | 1.48 | 0.11 |
| BSU09880 | <i>yhaR</i> | 0.78 | 0.01 | 0.96 | 0.84 |
| BSU09890 | <i>natA</i> | 0.66 | 0.00 | 0.76 | 0.01 |

|          |              |      |      |      |      |
|----------|--------------|------|------|------|------|
| BSU09900 | <i>natB</i>  | 0.73 | 0.02 | 0.80 | 0.10 |
| BSU09910 | <i>yhaO</i>  | 0.98 | 0.87 | 1.00 | 0.99 |
| BSU09920 | <i>yhaN</i>  | 0.60 | 0.00 | 0.80 | 0.01 |
| BSU09930 | <i>yhaM</i>  | 0.65 | 0.00 | 0.94 | 0.49 |
| BSU09950 | <i>prsA</i>  | 0.69 | 0.05 | 0.92 | 0.36 |
| BSU09958 | <i>yhzE</i>  | 0.66 | 0.17 | 0.58 | 0.04 |
| BSU09980 | <i>yhaI</i>  | 0.41 | 0.00 | 0.59 | 0.03 |
| BSU09990 | <i>hpr</i>   | 0.35 | 0.00 | 0.28 | 0.00 |
| BSU10000 | <i>yhaH</i>  | 1.21 | 0.05 | 1.26 | 0.06 |
| BSU10010 | <i>trpP</i>  | 1.05 | 0.77 | 0.94 | 0.43 |
| BSU10020 | <i>serC</i>  | 0.56 | 0.00 | 0.53 | 0.00 |
| BSU10030 | <i>hinT</i>  | 1.02 | 0.91 | 1.08 | 0.54 |
| BSU10050 | <i>ecsB</i>  | 0.50 | 0.00 | 0.76 | 0.05 |
| BSU10060 | <i>ecsC</i>  | 1.29 | 0.02 | 1.56 | 0.00 |
| BSU10100 | <i>yhgC</i>  | 1.43 | 0.00 | 1.36 | 0.08 |
| BSU10120 | <i>hemE</i>  | 0.49 | 0.00 | 0.41 | 0.00 |
| BSU10130 | <i>hemH</i>  | 0.62 | 0.01 | 0.74 | 0.00 |
| BSU10140 | <i>hemY</i>  | 1.05 | 0.97 | 1.10 | 0.46 |
| BSU10150 | <i>yhgD</i>  | 0.83 | 0.04 | 0.88 | 0.13 |
| BSU10160 | <i>yhgE</i>  | 0.39 | 0.00 | 0.44 | 0.01 |
| BSU10170 | <i>fabHB</i> | 1.02 | 0.90 | 0.98 | 0.87 |
| BSU10200 | <i>yhfE</i>  | 0.72 | 0.01 | 0.65 | 0.03 |
| BSU10210 | <i>yhfF</i>  | 1.61 | 0.00 | 1.54 | 0.02 |
| BSU10220 | <i>gltT</i>  | 0.69 | 0.01 | 0.85 | 0.13 |
| BSU10240 | <i>yhfI</i>  | 0.87 | 0.35 | 0.96 | 0.64 |
| BSU10250 | <i>yhfJ</i>  | 0.70 | 0.01 | 0.74 | 0.05 |
| BSU10260 | <i>yhfK</i>  | 1.01 | 0.76 | 1.41 | 0.01 |
| BSU10310 | <i>yhfO</i>  | 0.98 | 0.67 | 0.71 | 0.23 |
| BSU10320 | <i>yhfP</i>  | 0.85 | 0.03 | 0.94 | 0.70 |
| BSU10330 | <i>yhfQ</i>  | 0.83 | 0.25 | 0.86 | 0.12 |
| BSU10340 | <i>phoE</i>  | 0.58 | 0.02 | 0.71 | 0.03 |
| BSU10380 | <i>hemAT</i> | 0.53 | 0.00 | 0.63 | 0.06 |
| BSU10410 | <i>yhzC</i>  | 1.21 | 0.49 | 1.46 | 0.30 |
| BSU10440 | <i>yhjA</i>  | 1.40 | 0.03 | 1.75 | 0.00 |
| BSU10480 | <i>yhjE</i>  | 0.81 | 0.05 | 0.77 | 0.15 |
| BSU10490 | <i>sipV</i>  | 1.48 | 0.01 | 2.10 | 0.01 |
| BSU10620 | <i>addB</i>  | 0.53 | 0.00 | 0.35 | 0.00 |
| BSU10630 | <i>addA</i>  | 0.67 | 0.04 | 0.89 | 0.32 |
| BSU10640 | <i>sbcD</i>  | 0.98 | 0.81 | 1.03 | 0.87 |
| BSU10650 | <i>sbcC</i>  | 0.69 | 0.08 | 0.94 | 0.74 |
| BSU10660 | <i>yisB</i>  | 1.37 | 0.02 | 1.84 | 0.05 |
| BSU10730 | <i>yisI</i>  | 0.90 | 0.72 | 0.90 | 0.61 |
| BSU10750 | <i>yisK</i>  | 0.87 | 0.04 | 1.05 | 0.68 |
| BSU10760 | <i>yisL</i>  | 1.02 | 0.89 | 1.37 | 0.27 |
| BSU10770 | <i>wprA</i>  | 0.70 | 0.10 | 1.13 | 0.55 |
| BSU10860 | <i>yisT</i>  | 1.06 | 0.85 | 1.03 | 0.94 |
| BSU10990 | <i>yitH</i>  | 0.72 | 0.06 | 0.68 | 0.00 |

|          |               |      |      |      |      |
|----------|---------------|------|------|------|------|
| BSU11020 | <i>yitK</i>   | 0.50 | 0.00 | 0.60 | 0.06 |
| BSU11030 | <i>yitL</i>   | 0.29 | 0.00 | 0.47 | 0.00 |
| BSU11110 | <i>yitS</i>   | 0.69 | 0.01 | 1.56 | 0.02 |
| BSU11120 | <i>yitT</i>   | 0.45 | 0.00 | 0.65 | 0.01 |
| BSU11130 | <i>ipi</i>    | 1.88 | 0.00 | 2.69 | 0.00 |
| BSU11139 | <i>yizC</i>   | 2.59 | 0.00 | 2.17 | 0.00 |
| BSU11140 | <i>yitU</i>   | 0.32 | 0.00 | 0.62 | 0.02 |
| BSU11150 | <i>yitV</i>   | 0.42 | 0.00 | 0.52 | 0.00 |
| BSU11160 | <i>yitW</i>   | 1.70 | 0.02 | 1.86 | 0.04 |
| BSU11170 | <i>yitY</i>   | 0.53 | 0.01 | 0.78 | 0.02 |
| BSU11180 | <i>yitZ</i>   | 0.98 | 0.74 | 1.09 | 0.61 |
| BSU11270 | <i>yjzD</i>   | 0.99 | 0.92 | 0.91 | 0.74 |
| BSU11300 | <i>med</i>    | 0.21 | 0.00 | 0.11 | 0.00 |
| BSU11310 | <i>comZ</i>   | 1.87 | 0.00 | 1.95 | 0.01 |
| BSU11320 | <i>yjzB</i>   | 0.89 | 0.35 | 0.50 | 0.03 |
| BSU11330 | <i>fabHA</i>  | 0.73 | 0.01 | 0.47 | 0.00 |
| BSU11340 | <i>fabF</i>   | 0.51 | 0.00 | 0.70 | 0.00 |
| BSU11420 | <i>trpS</i>   | 0.74 | 0.02 | 0.94 | 0.35 |
| BSU11430 | <i>oppA</i>   | 1.07 | 0.19 | 1.36 | 0.05 |
| BSU11440 | <i>oppB</i>   | 1.24 | 0.22 | 0.83 | 0.17 |
| BSU11450 | <i>oppC</i>   | 0.78 | 0.21 | 0.91 | 0.49 |
| BSU11460 | <i>oppD</i>   | 1.03 | 0.89 | 0.89 | 0.42 |
| BSU11470 | <i>oppF</i>   | 1.17 | 0.59 | 1.24 | 0.00 |
| BSU11490 | <i>yjbC</i>   | 0.61 | 0.07 | 0.81 | 0.35 |
| BSU11500 | <i>spxA</i>   | 0.79 | 0.03 | 0.83 | 0.33 |
| BSU11520 | <i>mecA</i>   | 1.21 | 0.01 | 3.33 | 0.00 |
| BSU11540 | <i>pepF</i>   | 0.60 | 0.00 | 0.60 | 0.00 |
| BSU11550 | <i>yjbH</i>   | 1.05 | 0.75 | 1.20 | 0.21 |
| BSU11560 | <i>yjbI</i>   | 0.37 | 0.00 | 0.43 | 0.00 |
| BSU11570 | <i>yjbJ</i>   | 0.69 | 0.19 | 1.06 | 0.58 |
| BSU11590 | <i>yjbL</i>   | 0.60 | 0.01 | 0.85 | 0.29 |
| BSU11600 | <i>yjbM</i>   | 0.97 | 0.47 | 1.07 | 0.59 |
| BSU11610 | <i>ppnK</i>   | 0.86 | 0.04 | 0.87 | 0.31 |
| BSU11620 | <i>yjbO</i>   | 1.20 | 0.04 | 1.14 | 0.58 |
| BSU11680 | <i>thiS</i>   | 0.81 | 0.21 | 0.87 | 0.18 |
| BSU11690 | <i>thiG</i>   | 1.18 | 0.20 | 0.89 | 0.45 |
| BSU11700 | <i>thiF</i>   | 1.25 | 0.12 | 0.81 | 0.12 |
| BSU11710 | <i>yjbV</i>   | 1.03 | 0.91 | 1.21 | 0.40 |
| BSU11720 | <i>fabI</i>   | 0.72 | 0.06 | 0.77 | 0.02 |
| BSU11740 | <i>cotZ</i>   | 0.72 | 0.00 | 1.44 | 0.00 |
| BSU11750 | <i>cotY</i>   | 0.76 | 0.01 | 0.82 | 0.03 |
| BSU11760 | <i>cotX</i>   | 1.17 | 0.27 | 1.47 | 0.01 |
| BSU11770 | <i>cotW</i>   | 0.86 | 0.24 | 0.80 | 0.46 |
| BSU11780 | <i>cotV</i>   | 0.95 | 0.48 | 1.20 | 0.89 |
| BSU11809 | <i>yjcZ</i>   | 0.36 | 0.02 | 0.52 | 0.10 |
| BSU11810 | <i>spoVIF</i> | 1.40 | 0.04 | 1.63 | 0.13 |
| BSU11839 | <i>yjzE</i>   | 0.99 | 0.97 | 1.01 | 0.91 |

|          |             |      |      |       |      |
|----------|-------------|------|------|-------|------|
| BSU11840 | <i>yjcF</i> | 1.35 | 0.08 | 0.90  | 0.37 |
| BSU11850 | <i>yjcG</i> | 0.47 | 0.00 | 0.61  | 0.01 |
| BSU11860 | <i>yjcH</i> | 0.76 | 0.07 | 0.81  | 0.09 |
| BSU11910 | <i>yjcM</i> | 0.46 | 0.00 | 1.25  | 0.50 |
| BSU11920 | <i>yjcN</i> | 0.74 | 0.01 | 0.68  | 0.31 |
| BSU11950 | <i>yjcQ</i> | 1.56 | 0.01 | 1.31  | 0.49 |
| BSU11970 | <i>yjcS</i> | 0.51 | 0.09 | 0.50  | 0.09 |
| BSU11980 | <i>yjdA</i> | 0.79 | 0.16 | 0.84  | 0.52 |
| BSU12000 | <i>manR</i> | 0.39 | 0.03 | 0.79  | 0.13 |
| BSU12010 | <i>manP</i> | 0.52 | 0.01 | 0.41  | 0.00 |
| BSU12020 | <i>manA</i> | 0.89 | 0.41 | 1.10  | 0.45 |
| BSU12030 | <i>yjdF</i> | 1.41 | 0.13 | 1.28  | 0.04 |
| BSU12040 | <i>yjdG</i> | 0.79 | 0.03 | 0.47  | 0.05 |
| BSU12050 | <i>yjdH</i> | 0.54 | 0.01 | 0.95  | 0.73 |
| BSU12060 | <i>yjdI</i> | 0.28 | 0.00 | 0.36  | 0.01 |
| BSU12069 | <i>yjzH</i> | 0.90 | 0.61 | 0.74  | 0.26 |
| BSU12100 | <i>yjeA</i> | 0.23 | 0.00 | 0.26  | 0.00 |
| BSU12120 | <i>yjfB</i> | 0.85 | 0.70 | 0.60  | 0.36 |
| BSU12160 | <i>yjgC</i> | 0.86 | 0.30 | 0.75  | 0.23 |
| BSU12170 | <i>yjgD</i> | 1.03 | 0.98 | 1.13  | 0.67 |
| BSU12230 | <i>hemD</i> | 0.43 | 0.00 | 0.56  | 0.01 |
| BSU12270 | <i>yjIB</i> | 0.91 | 0.50 | 0.81  | 0.07 |
| BSU12280 | <i>rex</i>  | 1.13 | 0.13 | 0.91  | 0.44 |
| BSU12290 | <i>ndh</i>  | 0.92 | 0.44 | 0.95  | 0.44 |
| BSU12300 | <i>uxaC</i> | 0.72 | 0.11 | 1.26  | 0.00 |
| BSU12410 | <i>yjoA</i> | 1.14 | 0.15 | 1.06  | 0.18 |
| BSU12420 | <i>yjoB</i> | 0.82 | 0.16 | 0.88  | 0.33 |
| BSU12430 | <i>rapA</i> | 3.22 | 0.00 | 33.62 | 0.00 |
| BSU12440 | <i>phrA</i> | 2.09 | 0.01 | 2.25  | 0.03 |
| BSU12470 | <i>yjqA</i> | 0.93 | 0.71 | 1.02  | 0.93 |
| BSU12490 | <i>yjqC</i> | 1.08 | 0.71 | 1.14  | 0.20 |
| BSU12570 | <i>xtmA</i> | 0.81 | 0.11 | 0.85  | 0.12 |
| BSU12580 | <i>xtmB</i> | 1.08 | 0.10 | 1.03  | 0.71 |
| BSU12590 | <i>xkdE</i> | 0.98 | 0.63 | 1.07  | 0.15 |
| BSU12600 | <i>xkdF</i> | 0.97 | 0.39 | 0.94  | 0.47 |
| BSU12610 | <i>xkdG</i> | 0.83 | 0.05 | 0.73  | 0.09 |
| BSU12619 | <i>yzL</i>  | 0.95 | 0.34 | 1.08  | 0.59 |
| BSU12620 | <i>xkdH</i> | 1.34 | 0.01 | 1.26  | 0.00 |
| BSU12630 | <i>xkdI</i> | 1.14 | 0.08 | 1.11  | 0.53 |
| BSU12640 | <i>xkdJ</i> | 1.26 | 0.02 | 1.31  | 0.13 |
| BSU12649 | <i>yzM</i>  | 1.06 | 0.62 | 1.18  | 0.37 |
| BSU12650 | <i>xkdK</i> | 1.03 | 0.71 | 1.11  | 0.22 |
| BSU12660 | <i>xkdM</i> | 0.90 | 0.12 | 1.11  | 0.26 |
| BSU12671 | <i>xkdN</i> | 1.04 | 0.72 | 1.21  | 0.39 |
| BSU12672 | <i>xkzB</i> | 1.20 | 0.46 | 1.05  | 0.92 |
| BSU12680 | <i>xkdO</i> | 0.73 | 0.05 | 0.61  | 0.02 |
| BSU12690 | <i>xkdP</i> | 1.42 | 0.01 | 1.07  | 0.43 |



|          |                |      |      |      |      |
|----------|----------------|------|------|------|------|
| BSU12700 | <i>xkdQ</i>    | 0.84 | 0.07 | 1.03 | 0.80 |
| BSU12710 | <i>xkdR</i>    | 1.36 | 0.00 | 1.46 | 0.02 |
| BSU12720 | <i>xkdS</i>    | 1.14 | 0.02 | 0.91 | 0.36 |
| BSU12730 | <i>xkdT</i>    | 0.67 | 0.00 | 1.00 | 0.99 |
| BSU12740 | <i>xkdU</i>    | 1.13 | 0.07 | 0.86 | 0.12 |
| BSU12749 | <i>xkzA</i>    | 1.10 | 0.18 | 1.14 | 0.52 |
| BSU12750 | <i>xkdV</i>    | 0.76 | 0.12 | 1.41 | 0.21 |
| BSU12760 | <i>xkdW</i>    | 0.84 | 0.25 | 0.85 | 0.06 |
| BSU12770 | <i>xkdX</i>    | 1.27 | 0.03 | 1.42 | 0.04 |
| BSU12780 | <i>xepA</i>    | 1.11 | 0.26 | 1.04 | 0.63 |
| BSU12790 | <i>xhIA</i>    | 0.80 | 0.02 | 1.04 | 0.71 |
| BSU12800 | <i>xhIB</i>    | 1.02 | 0.76 | 0.98 | 0.89 |
| BSU12810 | <i>xlyA</i>    | 0.76 | 0.01 | 1.12 | 0.18 |
| BSU12820 | <i>spolISB</i> | 1.32 | 0.01 | 1.51 | 0.02 |
| BSU12830 | <i>spolISA</i> | 0.17 | 0.00 | 0.24 | 0.00 |
| BSU12840 | <i>pit</i>     | 0.71 | 0.00 | 1.01 | 0.99 |
| BSU12850 | <i>ykaA</i>    | 0.59 | 0.02 | 1.04 | 0.82 |
| BSU12860 | <i>ykbA</i>    | 0.44 | 0.00 | 0.46 | 0.00 |
| BSU13010 | <i>ykgB</i>    | 0.96 | 0.07 | 1.27 | 0.02 |
| BSU13020 | <i>ykgA</i>    | 1.33 | 0.11 | 0.94 | 0.62 |
| BSU13030 | <i>ykhA</i>    | 0.78 | 0.04 | 0.84 | 0.15 |
| BSU13110 | <i>purU</i>    | 0.66 | 0.00 | 0.71 | 0.06 |
| BSU13120 | <i>proB</i>    | 0.46 | 0.01 | 0.49 | 0.00 |
| BSU13130 | <i>proA</i>    | 0.57 | 0.00 | 0.94 | 0.67 |
| BSU13140 | <i>ohrA</i>    | 1.37 | 0.05 | 1.30 | 0.05 |
| BSU13150 | <i>ohrR</i>    | 2.06 | 0.01 | 1.47 | 0.11 |
| BSU13160 | <i>ohrB</i>    | 1.00 | 1.00 | 0.99 | 0.92 |
| BSU13169 | <i>ykzN</i>    | 0.97 | 0.91 | 0.79 | 0.30 |
| BSU13200 | <i>rsbRB</i>   | 0.99 | 0.98 | 1.07 | 0.75 |
| BSU13280 | <i>ykoJ</i>    | 0.96 | 0.70 | 1.23 | 0.30 |
| BSU13300 | <i>mgtE</i>    | 0.72 | 0.03 | 2.25 | 0.00 |
| BSU13340 | <i>ykoM</i>    | 1.26 | 0.08 | 1.01 | 0.92 |
| BSU13430 | <i>ykoX</i>    | 0.31 | 0.00 | 0.37 | 0.00 |
| BSU13480 | <i>ykrK</i>    | 1.30 | 0.20 | 1.53 | 0.09 |
| BSU13490 | <i>ykrL</i>    | 0.61 | 0.00 | 0.80 | 0.09 |
| BSU13540 | <i>ogt</i>     | 0.74 | 0.08 | 0.99 | 0.87 |
| BSU13620 | <i>mtnD</i>    | 0.89 | 0.40 | 0.56 | 0.09 |
| BSU13630 | <i>ykvA</i>    | 1.47 | 0.03 | 1.38 | 0.14 |
| BSU13640 | <i>spo0E</i>   | 0.88 | 0.78 | 1.03 | 0.89 |
| BSU13660 | <i>kinD</i>    | 0.50 | 0.00 | 0.84 | 0.24 |
| BSU13670 | <i>mhqR</i>    | 1.04 | 0.89 | 1.06 | 0.85 |
| BSU13680 | <i>motB</i>    | 1.09 | 0.74 | 1.07 | 0.87 |
| BSU13690 | <i>motA</i>    | 0.60 | 0.09 | 0.51 | 0.02 |
| BSU13700 | <i>clpE</i>    | 0.42 | 0.01 | 0.71 | 0.01 |
| BSU13720 | <i>queC</i>    | 0.66 | 0.01 | 0.68 | 0.02 |
| BSU13730 | <i>queD</i>    | 0.78 | 0.06 | 0.85 | 0.05 |
| BSU13740 | <i>queE</i>    | 0.68 | 0.01 | 0.84 | 0.01 |

|          |              |      |      |      |      |
|----------|--------------|------|------|------|------|
| BSU13750 | <i>ykvM</i>  | 0.77 | 0.01 | 0.86 | 0.12 |
| BSU13810 | <i>ykvS</i>  | 0.74 | 0.10 | 1.10 | 0.83 |
| BSU13819 | <i>yksz</i>  | 1.35 | 0.29 | 1.51 | 0.16 |
| BSU13860 | <i>ykvY</i>  | 0.49 | 0.00 | 0.53 | 0.00 |
| BSU13870 | <i>ykvZ</i>  | 0.74 | 0.02 | 0.91 | 0.19 |
| BSU13880 | <i>glcT</i>  | 0.13 | 0.00 | 0.28 | 0.01 |
| BSU13890 | <i>ptsG</i>  | 0.85 | 0.40 | 0.99 | 0.86 |
| BSU13900 | <i>ptsH</i>  | 0.82 | 0.03 | 0.68 | 0.06 |
| BSU13910 | <i>ptsI</i>  | 0.78 | 0.07 | 0.86 | 0.19 |
| BSU13920 | <i>splA</i>  | 0.91 | 0.34 | 0.97 | 0.59 |
| BSU13930 | <i>splB</i>  | 0.92 | 0.30 | 1.15 | 0.17 |
| BSU13950 | <i>mcpC</i>  | 0.80 | 0.22 | 0.82 | 0.15 |
| BSU13960 | <i>ykwC</i>  | 1.13 | 0.12 | 1.04 | 0.87 |
| BSU13980 | <i>pbpH</i>  | 0.49 | 0.01 | 0.84 | 0.13 |
| BSU14000 | <i>patA</i>  | 0.51 | 0.00 | 0.92 | 0.47 |
| BSU14009 | <i>ykszT</i> | 0.78 | 0.40 | 0.91 | 0.81 |
| BSU14010 | <i>cheV</i>  | 0.55 | 0.00 | 0.38 | 0.00 |
| BSU14020 | <i>ykyB</i>  | 0.89 | 0.38 | 2.69 | 0.00 |
| BSU14030 | <i>ykuC</i>  | 0.91 | 0.19 | 0.91 | 0.38 |
| BSU14071 | <i>fadG</i>  | 0.69 | 0.19 | 1.08 | 0.89 |
| BSU14072 | <i>ykszU</i> | 1.39 | 0.18 | 1.91 | 0.11 |
| BSU14080 | <i>ykuH</i>  | 0.61 | 0.23 | 0.44 | 0.11 |
| BSU14090 | <i>ykuI</i>  | 0.47 | 0.00 | 0.76 | 0.23 |
| BSU14100 | <i>ykuJ</i>  | 0.75 | 0.19 | 0.86 | 0.35 |
| BSU14110 | <i>ykuK</i>  | 4.36 | 0.00 | 1.07 | 0.42 |
| BSU14120 | <i>ykszF</i> | 1.50 | 0.01 | 1.58 | 0.02 |
| BSU14130 | <i>ykuL</i>  | 1.22 | 0.32 | 1.10 | 0.80 |
| BSU14140 | <i>ccpC</i>  | 0.70 | 0.11 | 1.02 | 0.88 |
| BSU14150 | <i>ykuN</i>  | 0.53 | 0.16 | 0.55 | 0.03 |
| BSU14160 | <i>ykuO</i>  | 0.83 | 0.48 | 0.89 | 0.33 |
| BSU14170 | <i>ykuP</i>  | 1.36 | 0.19 | 2.03 | 0.04 |
| BSU14180 | <i>dapH</i>  | 0.80 | 0.14 | 0.80 | 0.18 |
| BSU14190 | <i>dapL</i>  | 0.63 | 0.00 | 0.91 | 0.09 |
| BSU14200 | <i>ykuS</i>  | 1.62 | 0.00 | 1.30 | 0.24 |
| BSU14210 | <i>ykuT</i>  | 1.28 | 0.08 | 2.67 | 0.00 |
| BSU14240 | <i>rok</i>   | 0.79 | 0.28 | 0.58 | 0.09 |
| BSU14260 | <i>mobA</i>  | 1.12 | 0.28 | 0.87 | 0.15 |
| BSU14270 | <i>moeB</i>  | 0.56 | 0.00 | 0.68 | 0.02 |
| BSU14280 | <i>moeA</i>  | 0.61 | 0.04 | 0.71 | 0.06 |
| BSU14290 | <i>mobB</i>  | 0.83 | 0.19 | 1.02 | 0.97 |
| BSU14300 | <i>moaE</i>  | 0.89 | 0.33 | 0.82 | 0.23 |
| BSU14310 | <i>moaD</i>  | 2.42 | 0.01 | 2.24 | 0.00 |
| BSU14340 | <i>yknW</i>  | 0.74 | 0.01 | 0.89 | 0.43 |
| BSU14350 | <i>yknX</i>  | 1.32 | 0.02 | 1.24 | 0.30 |
| BSU14360 | <i>yknY</i>  | 0.91 | 0.37 | 0.72 | 0.24 |
| BSU14370 | <i>yknZ</i>  | 1.09 | 0.63 | 1.25 | 0.40 |
| BSU14380 | <i>fruR</i>  | 1.00 | 1.00 | 0.91 | 0.41 |

|          |              |      |      |      |      |
|----------|--------------|------|------|------|------|
| BSU14390 | <i>fruK</i>  | 0.85 | 0.02 | 0.78 | 0.04 |
| BSU14400 | <i>fruA</i>  | 0.68 | 0.01 | 0.97 | 0.81 |
| BSU14410 | <i>sipT</i>  | 0.83 | 0.21 | 1.02 | 0.81 |
| BSU14420 | <i>ykoA</i>  | 1.43 | 0.25 | 1.73 | 0.11 |
| BSU14430 | <i>ykpA</i>  | 0.44 | 0.00 | 0.67 | 0.00 |
| BSU14440 | <i>ykpB</i>  | 1.06 | 0.85 | 1.10 | 0.23 |
| BSU14450 | <i>ampS</i>  | 0.40 | 0.00 | 0.52 | 0.00 |
| BSU14460 | <i>ykpC</i>  | 1.84 | 0.00 | 2.06 | 0.08 |
| BSU14470 | <i>mreBH</i> | 0.64 | 0.00 | 0.70 | 0.01 |
| BSU14480 | <i>abh</i>   | 1.80 | 0.00 | 1.83 | 0.16 |
| BSU14490 | <i>kinC</i>  | 0.67 | 0.01 | 0.61 | 0.06 |
| BSU14500 | <i>ykqA</i>  | 1.13 | 0.30 | 1.02 | 0.93 |
| BSU14510 | <i>ktrC</i>  | 1.18 | 0.10 | 1.09 | 0.32 |
| BSU14520 | <i>adeC</i>  | 0.43 | 0.00 | 0.52 | 0.00 |
| BSU14530 | <i>rnjA</i>  | 0.49 | 0.00 | 0.65 | 0.00 |
| BSU14540 | <i>yzkG</i>  | 0.64 | 0.06 | 0.74 | 0.30 |
| BSU14550 | <i>ykrA</i>  | 0.86 | 0.43 | 0.79 | 0.09 |
| BSU14560 | <i>def</i>   | 0.67 | 0.00 | 0.93 | 0.35 |
| BSU14569 | <i>yzkV</i>  | 1.33 | 0.44 | 1.27 | 0.41 |
| BSU14580 | <i>pdhA</i>  | 0.67 | 0.00 | 1.02 | 0.73 |
| BSU14590 | <i>pdhB</i>  | 0.71 | 0.04 | 0.90 | 0.37 |
| BSU14600 | <i>pdhC</i>  | 0.74 | 0.10 | 0.97 | 0.45 |
| BSU14610 | <i>pdhD</i>  | 0.99 | 0.93 | 1.12 | 0.50 |
| BSU14640 | <i>yktA</i>  | 1.35 | 0.02 | 1.43 | 0.06 |
| BSU14650 | <i>yktB</i>  | 0.66 | 0.01 | 0.87 | 0.36 |
| BSU14660 | <i>yzkI</i>  | 1.28 | 0.52 | 1.23 | 0.31 |
| BSU14670 | <i>suhB</i>  | 0.46 | 0.00 | 0.43 | 0.00 |
| BSU14680 | <i>yzkC</i>  | 0.99 | 0.82 | 1.27 | 0.07 |
| BSU14760 | <i>ylaF</i>  | 0.92 | 0.68 | 0.74 | 0.26 |
| BSU14770 | <i>bipA</i>  | 0.44 | 0.00 | 0.53 | 0.00 |
| BSU14780 | <i>ylaH</i>  | 2.05 | 0.00 | 2.27 | 0.00 |
| BSU14790 | <i>ylaI</i>  | 0.97 | 0.83 | 1.31 | 0.49 |
| BSU14810 | <i>ylaK</i>  | 0.01 | 0.00 | 0.17 | 0.00 |
| BSU14820 | <i>ylaL</i>  | 0.67 | 0.00 | 1.12 | 0.26 |
| BSU14840 | <i>ylaN</i>  | 1.11 | 0.54 | 1.72 | 0.01 |
| BSU14850 | <i>ftsW</i>  | 0.51 | 0.00 | 0.46 | 0.04 |
| BSU14860 | <i>pycA</i>  | 0.49 | 0.00 | 0.64 | 0.01 |
| BSU14870 | <i>ctaA</i>  | 0.90 | 0.40 | 0.99 | 0.85 |
| BSU14880 | <i>ctaB</i>  | 0.68 | 0.00 | 1.00 | 0.86 |
| BSU14920 | <i>ctaF</i>  | 1.10 | 0.58 | 1.03 | 0.87 |
| BSU14940 | <i>ylbA</i>  | 1.23 | 0.24 | 1.16 | 0.14 |
| BSU14950 | <i>ylbB</i>  | 0.43 | 0.00 | 0.93 | 0.60 |
| BSU14990 | <i>ylbF</i>  | 0.65 | 0.07 | 0.97 | 0.75 |
| BSU15000 | <i>ylbG</i>  | 1.36 | 0.04 | 1.87 | 0.05 |
| BSU15010 | <i>ylbH</i>  | 0.81 | 0.21 | 0.92 | 0.28 |
| BSU15020 | <i>coaD</i>  | 1.42 | 0.01 | 2.02 | 0.00 |
| BSU15040 | <i>ylbK</i>  | 2.07 | 0.00 | 1.59 | 0.01 |

|          |               |       |      |       |      |
|----------|---------------|-------|------|-------|------|
| BSU15050 | <i>yblL</i>   | 0.50  | 0.02 | 0.79  | 0.00 |
| BSU15069 | <i>ylzH</i>   | 60.08 | 0.00 | 40.33 | 0.01 |
| BSU15070 | <i>yblN</i>   | 0.90  | 0.26 | 1.50  | 0.23 |
| BSU15080 | <i>rpmF</i>   | 1.35  | 0.18 | 1.69  | 0.06 |
| BSU15100 | <i>yblP</i>   | 1.01  | 0.96 | 0.85  | 0.35 |
| BSU15110 | <i>yblQ</i>   | 0.55  | 0.00 | 0.42  | 0.00 |
| BSU15120 | <i>yllA</i>   | 0.47  | 0.00 | 0.66  | 0.00 |
| BSU15130 | <i>yllB</i>   | 1.18  | 0.31 | 4.36  | 0.00 |
| BSU15140 | <i>mraW</i>   | 0.72  | 0.02 | 1.15  | 0.17 |
| BSU15150 | <i>ftsL</i>   | 1.17  | 0.12 | 1.45  | 0.06 |
| BSU15160 | <i>pbpB</i>   | 1.00  | 0.96 | 0.88  | 0.23 |
| BSU15180 | <i>murE</i>   | 0.61  | 0.01 | 0.56  | 0.00 |
| BSU15190 | <i>mraY</i>   | 0.54  | 0.00 | 0.47  | 0.00 |
| BSU15200 | <i>murD</i>   | 0.86  | 0.15 | 0.79  | 0.06 |
| BSU15210 | <i>spoVE</i>  | 1.06  | 0.63 | 1.76  | 0.01 |
| BSU15220 | <i>murG</i>   | 0.23  | 0.00 | 0.33  | 0.01 |
| BSU15230 | <i>murB</i>   | 0.48  | 0.00 | 0.85  | 0.10 |
| BSU15240 | <i>divIB</i>  | 0.86  | 0.03 | 1.07  | 0.52 |
| BSU15250 | <i>ylxW</i>   | 0.84  | 0.01 | 0.82  | 0.25 |
| BSU15260 | <i>ylxX</i>   | 0.96  | 0.60 | 0.84  | 0.09 |
| BSU15270 | <i>sbp</i>    | 2.09  | 0.01 | 3.24  | 0.04 |
| BSU15280 | <i>ftsA</i>   | 0.68  | 0.05 | 0.83  | 0.05 |
| BSU15290 | <i>ftsZ</i>   | 0.42  | 0.00 | 0.65  | 0.02 |
| BSU15370 | <i>ylmD</i>   | 0.71  | 0.03 | 0.83  | 0.13 |
| BSU15380 | <i>ylmE</i>   | 0.84  | 0.25 | 1.04  | 0.71 |
| BSU15390 | <i>sepF</i>   | 0.64  | 0.00 | 0.49  | 0.00 |
| BSU15400 | <i>ylmG</i>   | 1.34  | 0.01 | 1.32  | 0.17 |
| BSU15410 | <i>ylmH</i>   | 0.54  | 0.00 | 0.68  | 0.03 |
| BSU15420 | <i>divIVA</i> | 0.61  | 0.00 | 0.77  | 0.14 |
| BSU15430 | <i>ileS</i>   | 0.35  | 0.00 | 0.65  | 0.00 |
| BSU15450 | <i>lspA</i>   | 0.63  | 0.06 | 1.26  | 0.39 |
| BSU15460 | <i>rluD</i>   | 0.45  | 0.01 | 0.51  | 0.00 |
| BSU15470 | <i>pyrR</i>   | 0.91  | 0.49 | 1.06  | 0.58 |
| BSU15480 | <i>pyrP</i>   | 0.50  | 0.00 | 0.72  | 0.11 |
| BSU15490 | <i>pyrB</i>   | 0.74  | 0.13 | 0.79  | 0.03 |
| BSU15500 | <i>pyrC</i>   | 0.77  | 0.14 | 0.83  | 0.16 |
| BSU15510 | <i>pyrAA</i>  | 0.63  | 0.13 | 0.76  | 0.06 |
| BSU15520 | <i>carB</i>   | 0.85  | 0.61 | 0.94  | 0.42 |
| BSU15530 | <i>pyrK</i>   | 1.22  | 0.69 | 0.89  | 0.26 |
| BSU15540 | <i>pyrD</i>   | 1.03  | 0.95 | 1.07  | 0.68 |
| BSU15550 | <i>pyrF</i>   | 0.97  | 0.87 | 0.77  | 0.06 |
| BSU15560 | <i>pyrE</i>   | 1.11  | 0.87 | 1.27  | 0.01 |
| BSU15570 | <i>cysH</i>   | 1.19  | 0.45 | 1.26  | 0.11 |
| BSU15630 | <i>sirC</i>   | 1.36  | 0.20 | 1.34  | 0.01 |
| BSU15640 | <i>yloA</i>   | 0.40  | 0.00 | 0.62  | 0.00 |
| BSU15660 | <i>yloC</i>   | 1.17  | 0.27 | 1.19  | 0.05 |
| BSU15670 | <i>ylzA</i>   | 0.85  | 0.16 | 0.93  | 0.26 |

|          |              |      |      |      |      |
|----------|--------------|------|------|------|------|
| BSU15680 | <i>gmk</i>   | 0.87 | 0.16 | 1.23 | 0.11 |
| BSU15690 | <i>rpoZ</i>  | 1.83 | 0.00 | 1.56 | 0.10 |
| BSU15700 | <i>coaBC</i> | 0.61 | 0.00 | 0.76 | 0.04 |
| BSU15710 | <i>priA</i>  | 2.20 | 0.00 | 1.49 | 0.02 |
| BSU15720 | <i>def</i>   | 0.62 | 0.00 | 0.58 | 0.05 |
| BSU15730 | <i>fmt</i>   | 0.54 | 0.01 | 0.61 | 0.01 |
| BSU15740 | <i>rsmB</i>  | 0.82 | 0.02 | 0.75 | 0.00 |
| BSU15750 | <i>yloN</i>  | 1.01 | 0.84 | 1.00 | 0.90 |
| BSU15760 | <i>prpC</i>  | 1.10 | 0.41 | 1.10 | 0.26 |
| BSU15770 | <i>prkC</i>  | 0.82 | 0.06 | 0.88 | 0.10 |
| BSU15780 | <i>yloQ</i>  | 0.89 | 0.10 | 0.92 | 0.06 |
| BSU15790 | <i>rpe</i>   | 0.83 | 0.19 | 1.04 | 0.65 |
| BSU15800 | <i>thiN</i>  | 0.71 | 0.01 | 1.00 | 0.77 |
| BSU15810 | <i>spoVM</i> | 1.96 | 0.01 | 1.89 | 0.12 |
| BSU15820 | <i>rpmB</i>  | 1.35 | 0.12 | 1.42 | 0.18 |
| BSU15830 | <i>yloU</i>  | 0.69 | 0.00 | 0.72 | 0.02 |
| BSU15840 | <i>yloV</i>  | 0.65 | 0.01 | 0.77 | 0.02 |
| BSU15850 | <i>sdaAB</i> | 0.75 | 0.10 | 0.96 | 0.37 |
| BSU15860 | <i>sdaAA</i> | 0.73 | 0.00 | 0.80 | 0.22 |
| BSU15870 | <i>recG</i>  | 1.64 | 0.02 | 1.17 | 0.11 |
| BSU15880 | <i>ylpC</i>  | 0.96 | 0.65 | 0.78 | 0.11 |
| BSU15890 | <i>plsX</i>  | 0.91 | 0.41 | 0.89 | 0.07 |
| BSU15900 | <i>fabD</i>  | 0.64 | 0.01 | 0.58 | 0.00 |
| BSU15910 | <i>fabG</i>  | 1.02 | 0.83 | 1.10 | 0.28 |
| BSU15920 | <i>acpP</i>  | 1.31 | 0.41 | 1.18 | 0.29 |
| BSU15930 | <i>rnc</i>   | 1.24 | 0.15 | 2.25 | 0.05 |
| BSU15940 | <i>smc</i>   | 0.52 | 0.01 | 0.56 | 0.00 |
| BSU15950 | <i>ftsY</i>  | 0.87 | 0.16 | 0.83 | 0.28 |
| BSU15970 | <i>ylxM</i>  | 0.97 | 0.77 | 1.41 | 0.14 |
| BSU15980 | <i>ffh</i>   | 0.70 | 0.06 | 0.73 | 0.02 |
| BSU15990 | <i>rpsP</i>  | 0.72 | 0.06 | 0.69 | 0.03 |
| BSU16000 | <i>ylqC</i>  | 2.54 | 0.01 | 2.82 | 0.00 |
| BSU16010 | <i>ylqD</i>  | 1.03 | 0.83 | 1.14 | 0.16 |
| BSU16020 | <i>rimM</i>  | 0.84 | 0.06 | 1.08 | 0.21 |
| BSU16030 | <i>trmD</i>  | 0.83 | 0.12 | 0.95 | 0.41 |
| BSU16040 | <i>rplS</i>  | 1.11 | 0.58 | 1.33 | 0.17 |
| BSU16050 | <i>rbgA</i>  | 0.82 | 0.06 | 0.85 | 0.20 |
| BSU16060 | <i>rnhB</i>  | 1.03 | 0.99 | 0.98 | 0.72 |
| BSU16070 | <i>ylqG</i>  | 0.92 | 0.59 | 1.03 | 0.76 |
| BSU16080 | <i>ylqH</i>  | 1.79 | 0.10 | 2.09 | 0.01 |
| BSU16090 | <i>sucC</i>  | 0.79 | 0.00 | 0.97 | 0.53 |
| BSU16100 | <i>sucD</i>  | 1.41 | 0.04 | 1.35 | 0.09 |
| BSU16110 | <i>dprA</i>  | 1.36 | 0.24 | 7.16 | 0.00 |
| BSU16120 | <i>topA</i>  | 0.26 | 0.00 | 0.43 | 0.00 |
| BSU16130 | <i>gid</i>   | 0.56 | 0.00 | 0.84 | 0.12 |
| BSU16140 | <i>xerC</i>  | 1.03 | 0.81 | 0.70 | 0.15 |
| BSU16150 | <i>clpQ</i>  | 0.75 | 0.06 | 0.77 | 0.10 |

|          |             |      |      |      |      |
|----------|-------------|------|------|------|------|
| BSU16160 | <i>hslU</i> | 0.69 | 0.00 | 1.01 | 0.99 |
| BSU16170 | <i>codY</i> | 1.21 | 0.14 | 1.14 | 0.67 |
| BSU16180 | <i>flgB</i> | 0.70 | 0.01 | 0.73 | 0.24 |
| BSU16190 | <i>flgC</i> | 0.76 | 0.02 | 0.65 | 0.00 |
| BSU16200 | <i>fliE</i> | 0.92 | 0.32 | 1.00 | 0.97 |
| BSU16210 | <i>fliF</i> | 0.89 | 0.14 | 0.82 | 0.17 |
| BSU16220 | <i>fliG</i> | 1.01 | 0.94 | 0.94 | 0.46 |
| BSU16230 | <i>fliH</i> | 1.12 | 0.29 | 1.22 | 0.21 |
| BSU16240 | <i>fliI</i> | 1.06 | 0.62 | 1.46 | 0.01 |
| BSU16250 | <i>fliJ</i> | 0.94 | 0.68 | 0.92 | 0.78 |
| BSU16260 | <i>ylxF</i> | 1.06 | 0.69 | 1.10 | 0.45 |
| BSU16270 | <i>fliK</i> | 0.83 | 0.09 | 0.87 | 0.08 |
| BSU16280 | <i>flgD</i> | 1.06 | 0.31 | 1.21 | 0.51 |
| BSU16290 | <i>flgG</i> | 0.94 | 0.52 | 1.13 | 0.10 |
| BSU16299 | <i>ylzI</i> | 1.10 | 0.49 | 1.10 | 0.91 |
| BSU16300 | <i>fliL</i> | 0.74 | 0.01 | 0.71 | 0.27 |
| BSU16310 | <i>fliM</i> | 0.94 | 0.53 | 0.80 | 0.07 |
| BSU16320 | <i>fliY</i> | 0.80 | 0.09 | 0.92 | 0.18 |
| BSU16330 | <i>cheY</i> | 0.87 | 0.15 | 1.12 | 0.39 |
| BSU16340 | <i>fliZ</i> | 2.05 | 0.00 | 0.95 | 0.77 |
| BSU16350 | <i>fliP</i> | 1.12 | 0.29 | 1.25 | 0.39 |
| BSU16360 | <i>fliQ</i> | 1.41 | 0.12 | 1.44 | 0.17 |
| BSU16370 | <i>fliR</i> | 1.05 | 0.75 | 0.91 | 0.53 |
| BSU16380 | <i>flhB</i> | 1.17 | 0.28 | 1.15 | 0.25 |
| BSU16390 | <i>flhA</i> | 1.05 | 0.72 | 1.07 | 0.18 |
| BSU16400 | <i>flhF</i> | 1.02 | 0.80 | 0.94 | 0.78 |
| BSU16410 | <i>ylxH</i> | 1.15 | 0.32 | 1.33 | 0.02 |
| BSU16420 | <i>cheB</i> | 0.87 | 0.22 | 0.76 | 0.04 |
| BSU16430 | <i>cheA</i> | 0.88 | 0.23 | 0.96 | 0.51 |
| BSU16440 | <i>cheW</i> | 1.03 | 0.82 | 0.91 | 0.42 |
| BSU16450 | <i>cheC</i> | 0.93 | 0.52 | 0.86 | 0.23 |
| BSU16460 | <i>cheD</i> | 0.82 | 0.23 | 0.90 | 0.36 |
| BSU16470 | <i>sigD</i> | 0.94 | 0.54 | 1.33 | 0.42 |
| BSU16480 | <i>ylxL</i> | 0.92 | 0.05 | 0.96 | 0.85 |
| BSU16490 | <i>rpsB</i> | 1.08 | 0.30 | 2.15 | 0.01 |
| BSU16500 | <i>tsf</i>  | 0.92 | 0.28 | 1.13 | 0.21 |
| BSU16510 | <i>pyrH</i> | 0.77 | 0.01 | 1.22 | 0.10 |
| BSU16520 | <i>frr</i>  | 1.04 | 0.62 | 1.20 | 0.08 |
| BSU16530 | <i>uppS</i> | 0.84 | 0.04 | 0.84 | 0.21 |
| BSU16540 | <i>cdsA</i> | 0.92 | 0.43 | 0.92 | 0.75 |
| BSU16550 | <i>dxr</i>  | 0.64 | 0.00 | 0.64 | 0.00 |
| BSU16560 | <i>rseP</i> | 0.68 | 0.00 | 0.84 | 0.01 |
| BSU16570 | <i>proS</i> | 0.70 | 0.04 | 0.78 | 0.08 |
| BSU16580 | <i>polC</i> | 0.37 | 0.00 | 0.54 | 0.00 |
| BSU16590 | <i>ylxS</i> | 0.87 | 0.02 | 1.45 | 0.05 |
| BSU16600 | <i>nusA</i> | 0.64 | 0.01 | 0.72 | 0.02 |
| BSU16610 | <i>ylxR</i> | 0.88 | 0.43 | 1.04 | 0.70 |

|          |                |      |      |        |      |
|----------|----------------|------|------|--------|------|
| BSU16620 | <i>ylxQ</i>    | 1.09 | 0.57 | 1.13   | 0.18 |
| BSU16630 | <i>infB</i>    | 0.52 | 0.00 | 0.57   | 0.01 |
| BSU16640 | <i>ylxP</i>    | 0.98 | 0.81 | 1.06   | 0.79 |
| BSU16650 | <i>rbfA</i>    | 2.03 | 0.01 | 2.18   | 0.00 |
| BSU16660 | <i>truB</i>    | 0.66 | 0.01 | 0.79   | 0.01 |
| BSU16670 | <i>ribC</i>    | 0.84 | 0.18 | 1.11   | 0.25 |
| BSU16680 | <i>rpsO</i>    | 1.62 | 0.04 | 1.97   | 0.01 |
| BSU16690 | <i>pnpA</i>    | 0.77 | 0.01 | 105.93 | 0.00 |
| BSU16700 | <i>ylxY</i>    | 0.90 | 0.13 | 0.73   | 0.27 |
| BSU16710 | <i>mlpA</i>    | 0.87 | 0.08 | 0.71   | 0.06 |
| BSU16750 | <i>asd</i>     | 0.59 | 0.01 | 0.85   | 0.07 |
| BSU16760 | <i>dapG</i>    | 0.58 | 0.00 | 0.59   | 0.00 |
| BSU16770 | <i>dapA</i>    | 0.76 | 0.00 | 0.72   | 0.06 |
| BSU16780 | <i>rnjB</i>    | 0.54 | 0.00 | 0.74   | 0.01 |
| BSU16800 | <i>spolIIE</i> | 0.35 | 0.00 | 0.32   | 0.00 |
| BSU16810 | <i>ymfC</i>    | 1.71 | 0.03 | 2.89   | 0.00 |
| BSU16845 | <i>ymfF</i>    | 0.60 | 0.00 | 0.75   | 0.04 |
| BSU16860 | <i>ymfH</i>    | 0.83 | 0.01 | 1.16   | 0.01 |
| BSU16870 | <i>fabG</i>    | 0.86 | 0.23 | 1.17   | 0.18 |
| BSU16880 | <i>ymfJ</i>    | 1.90 | 0.00 | 1.96   | 0.00 |
| BSU16910 | <i>ymfM</i>    | 1.17 | 0.48 | 1.21   | 0.14 |
| BSU16920 | <i>pgsA</i>    | 0.53 | 0.00 | 0.51   | 0.00 |
| BSU16930 | <i>cinA</i>    | 0.86 | 0.12 | 1.04   | 0.69 |
| BSU16940 | <i>recA</i>    | 0.59 | 0.01 | 0.64   | 0.01 |
| BSU16950 | <i>pbpX</i>    | 0.52 | 0.01 | 0.77   | 0.25 |
| BSU16960 | <i>ymdA</i>    | 0.75 | 0.02 | 0.83   | 0.16 |
| BSU16970 | <i>ymdB</i>    | 0.77 | 0.03 | 0.83   | 0.50 |
| BSU16980 | <i>spoVS</i>   | 1.43 | 0.06 | 2.10   | 0.01 |
| BSU16990 | <i>tdh</i>     | 1.35 | 0.03 | 2.29   | 0.00 |
| BSU17000 | <i>kbl</i>     | 0.67 | 0.07 | 0.82   | 0.08 |
| BSU17010 | <i>ymcB</i>    | 0.51 | 0.01 | 0.70   | 0.00 |
| BSU17020 | <i>ymcA</i>    | 1.50 | 0.04 | 1.52   | 0.01 |
| BSU17040 | <i>mutS</i>    | 0.36 | 0.00 | 0.40   | 0.00 |
| BSU17050 | <i>mutL</i>    | 0.68 | 0.04 | 1.03   | 0.76 |
| BSU17230 | <i>pksS</i>    | 1.29 | 0.24 | 3.16   | 0.01 |
| BSU17280 | <i>ymaD</i>    | 0.86 | 0.24 | 0.79   | 0.11 |
| BSU17340 | <i>hfq</i>     | 0.82 | 0.37 | 0.97   | 0.92 |
| BSU17360 | <i>ymzA</i>    | 0.67 | 0.00 | 0.80   | 0.40 |
| BSU17370 | <i>nrdI</i>    | 0.86 | 0.14 | 1.61   | 0.04 |
| BSU17380 | <i>nrdE</i>    | 0.27 | 0.00 | 0.37   | 0.00 |
| BSU17390 | <i>nrdF</i>    | 0.74 | 0.00 | 1.11   | 0.42 |
| BSU17400 | <i>ymaB</i>    | 1.40 | 0.02 | 1.80   | 0.02 |
| BSU17430 | <i>ynbA</i>    | 0.61 | 0.00 | 0.77   | 0.09 |
| BSU17440 | <i>ynbB</i>    | 0.70 | 0.05 | 1.03   | 0.81 |
| BSU17450 | <i>glnR</i>    | 0.63 | 0.06 | 0.92   | 0.47 |
| BSU17460 | <i>glnA</i>    | 0.93 | 0.55 | 0.84   | 0.26 |
| BSU17500 | <i>ynaB</i>    | 1.65 | 0.11 | 1.40   | 0.50 |

|          |              |      |      |      |      |
|----------|--------------|------|------|------|------|
| BSU17510 | <i>ynaC</i>  | 1.27 | 0.44 | 1.29 | 0.51 |
| BSU17590 | <i>xylR</i>  | 0.82 | 0.34 | 1.03 | 0.95 |
| BSU17600 | <i>xylA</i>  | 0.73 | 0.01 | 1.16 | 0.25 |
| BSU17610 | <i>xylB</i>  | 0.76 | 0.15 | 1.10 | 0.63 |
| BSU17670 | <i>cotU</i>  | 0.90 | 0.77 | 0.55 | 0.31 |
| BSU17690 | <i>yncM</i>  | 0.80 | 0.02 | 1.61 | 0.01 |
| BSU17700 | <i>cotC</i>  | 0.88 | 0.67 | 0.77 | 0.44 |
| BSU17710 | <i>tatAC</i> | 1.19 | 0.07 | 1.32 | 0.64 |
| BSU17730 | <i>yndB</i>  | 1.66 | 0.00 | 1.28 | 0.16 |
| BSU17840 | <i>yndN</i>  | 0.84 | 0.67 | 0.79 | 0.47 |
| BSU17850 | <i>lexA</i>  | 0.48 | 0.00 | 0.46 | 0.00 |
| BSU17880 | <i>ynzC</i>  | 1.08 | 0.42 | 1.31 | 0.44 |
| BSU17890 | <i>tkt</i>   | 0.71 | 0.00 | 0.79 | 0.10 |
| BSU17910 | <i>yneF</i>  | 1.02 | 0.95 | 1.48 | 0.18 |
| BSU17950 | <i>yneJ</i>  | 1.14 | 0.55 | 0.97 | 0.95 |
| BSU17960 | <i>yneK</i>  | 0.97 | 0.43 | 0.90 | 0.56 |
| BSU18000 | <i>citB</i>  | 0.56 | 0.05 | 0.77 | 0.02 |
| BSU18010 | <i>yneN</i>  | 1.32 | 0.17 | 1.40 | 0.06 |
| BSU18060 | <i>yneR</i>  | 1.72 | 0.00 | 2.12 | 0.00 |
| BSU18070 | <i>yneS</i>  | 0.64 | 0.05 | 0.98 | 0.63 |
| BSU18080 | <i>yneT</i>  | 0.79 | 0.33 | 0.80 | 0.09 |
| BSU18090 | <i>parE</i>  | 0.48 | 0.00 | 0.43 | 0.00 |
| BSU18100 | <i>parC</i>  | 0.62 | 0.00 | 0.76 | 0.02 |
| BSU18110 | <i>ynfC</i>  | 0.63 | 0.01 | 1.28 | 0.37 |
| BSU18120 | <i>alsT</i>  | 0.50 | 0.02 | 0.56 | 0.00 |
| BSU18190 | <i>yngC</i>  | 0.49 | 0.00 | 0.94 | 0.58 |
| BSU18350 | <i>dacC</i>  | 0.81 | 0.07 | 1.05 | 0.80 |
| BSU18370 | <i>yoeA</i>  | 0.94 | 0.51 | 1.47 | 0.00 |
| BSU18380 | <i>iseA</i>  | 0.73 | 0.02 | 0.94 | 0.54 |
| BSU18500 | <i>fabG</i>  | 0.85 | 0.05 | 0.95 | 0.20 |
| BSU18510 | <i>yoxC</i>  | 0.65 | 0.09 | 0.58 | 0.03 |
| BSU18580 | <i>yoaF</i>  | 1.09 | 0.29 | 0.87 | 0.69 |
| BSU18590 | <i>yoaG</i>  | 1.11 | 0.68 | 1.09 | 0.83 |
| BSU18630 | <i>exlX</i>  | 1.14 | 0.33 | 1.23 | 0.05 |
| BSU18660 | <i>yoaM</i>  | 1.00 | 0.89 | 1.19 | 0.66 |
| BSU18669 | <i>yoaS</i>  | 1.08 | 0.65 | 2.75 | 0.03 |
| BSU18800 | <i>penP</i>  | 0.53 | 0.01 | 0.70 | 0.08 |
| BSU18840 | <i>xynA</i>  | 1.08 | 0.21 | 0.87 | 0.49 |
| BSU18849 | <i>yozV</i>  | 1.25 | 0.27 | 0.91 | 0.71 |
| BSU18910 | <i>rapK</i>  | 0.01 | 0.00 | 0.08 | 0.04 |
| BSU18920 | <i>phrK</i>  | 2.20 | 0.01 | 2.14 | 0.05 |
| BSU18970 | <i>yobI</i>  | 0.47 | 0.03 | 0.77 | 0.69 |
| BSU18980 | <i>yobJ</i>  | 0.56 | 0.18 | 0.59 | 0.44 |
| BSU19130 | <i>yocA</i>  | 1.33 | 0.04 | 1.71 | 0.09 |
| BSU19140 | <i>yozB</i>  | 0.76 | 0.31 | 0.87 | 0.52 |
| BSU19210 | <i>yocH</i>  | 1.06 | 0.65 | 4.35 | 0.01 |
| BSU19230 | <i>yocJ</i>  | 1.21 | 0.03 | 1.33 | 0.21 |



|          |             |      |      |      |      |
|----------|-------------|------|------|------|------|
| BSU19240 | <i>yocK</i> | 1.01 | 0.99 | 1.14 | 0.16 |
| BSU19250 | <i>yocL</i> | 0.91 | 0.27 | 1.05 | 0.64 |
| BSU19259 | <i>yoyB</i> | 1.17 | 0.30 | 0.95 | 0.46 |
| BSU19260 | <i>yocM</i> | 1.33 | 0.18 | 0.99 | 0.84 |
| BSU19270 | <i>yozN</i> | 0.88 | 0.22 | 0.76 | 0.45 |
| BSU19280 | <i>yocN</i> | 1.81 | 0.02 | 1.93 | 0.01 |
| BSU19290 | <i>yozO</i> | 0.95 | 0.70 | 0.94 | 0.97 |
| BSU19300 | <i>yozC</i> | 0.63 | 0.00 | 0.69 | 0.41 |
| BSU19310 | <i>dhaS</i> | 0.86 | 0.27 | 1.00 | 0.89 |
| BSU19340 | <i>yocR</i> | 0.61 | 0.01 | 1.22 | 0.15 |
| BSU19360 | <i>odhB</i> | 1.08 | 0.33 | 1.47 | 0.04 |
| BSU19370 | <i>sucA</i> | 1.05 | 0.50 | 1.28 | 0.02 |
| BSU19380 | <i>yojO</i> | 0.68 | 0.01 | 0.89 | 0.05 |
| BSU19390 | <i>yojN</i> | 0.67 | 0.01 | 0.65 | 0.00 |
| BSU19460 | <i>yojG</i> | 1.12 | 0.27 | 1.50 | 0.02 |
| BSU19470 | <i>yojF</i> | 0.94 | 0.43 | 1.22 | 0.04 |
| BSU19479 | <i>yoyC</i> | 0.79 | 0.05 | 0.80 | 0.24 |
| BSU19480 | <i>yojE</i> | 0.93 | 0.26 | 1.08 | 0.75 |
| BSU19540 | <i>yodB</i> | 0.46 | 0.00 | 0.69 | 0.02 |
| BSU19550 | <i>yodC</i> | 1.21 | 0.00 | 1.61 | 0.01 |
| BSU19590 | <i>ctpA</i> | 0.80 | 0.07 | 0.79 | 0.11 |
| BSU19610 | <i>yodI</i> | 0.86 | 0.73 | 1.15 | 0.35 |
| BSU19620 | <i>yodJ</i> | 0.92 | 0.43 | 1.14 | 0.50 |
| BSU19630 | <i>deoD</i> | 0.93 | 0.38 | 1.10 | 0.43 |
| BSU19650 | <i>yodM</i> | 0.56 | 0.01 | 3.15 | 0.00 |
| BSU19770 | <i>cgeC</i> | 1.13 | 0.66 | 1.16 | 0.52 |
| BSU19780 | <i>cgeA</i> | 0.81 | 0.02 | 0.80 | 0.16 |
| BSU19790 | <i>cgeB</i> | 3.24 | 0.00 | 1.71 | 0.01 |
| BSU19840 | <i>yotL</i> | 1.25 | 0.57 | 1.10 | 0.93 |
| BSU20190 | <i>yosA</i> | 0.56 | 0.29 | 0.56 | 0.02 |
| BSU20420 | <i>yorD</i> | 1.00 | 0.96 | 1.29 | 0.43 |
| BSU20440 | <i>yorB</i> | 0.83 | 0.16 | 0.71 | 0.29 |
| BSU20760 | <i>yopU</i> | 1.54 | 0.08 | 1.37 | 0.49 |
| BSU20770 | <i>yopT</i> | 0.98 | 0.83 | 2.12 | 0.42 |
| BSU20780 | <i>yopS</i> | 1.00 | 0.97 | 1.05 | 0.82 |
| BSU20790 | <i>yopR</i> | 0.94 | 0.80 | 1.12 | 0.93 |
| BSU20800 | <i>yopQ</i> | 0.58 | 0.02 | 0.59 | 0.30 |
| BSU20820 | <i>yopO</i> | 1.26 | 0.08 | 1.09 | 0.91 |
| BSU20850 | <i>yopL</i> | 0.62 | 0.39 | 0.77 | 0.48 |
| BSU20860 | <i>yopK</i> | 0.76 | 0.06 | 0.90 | 0.72 |
| BSU20929 | <i>yoyI</i> | 1.09 | 0.37 | 0.93 | 0.57 |
| BSU20930 | <i>yopD</i> | 1.15 | 0.07 | 1.23 | 0.60 |
| BSU20940 | <i>yopC</i> | 0.50 | 0.06 | 0.54 | 0.29 |
| BSU20960 | <i>yopA</i> | 0.33 | 0.01 | 0.37 | 0.13 |
| BSU20990 | <i>yonU</i> | 1.56 | 0.01 | 1.55 | 0.26 |
| BSU20999 | <i>yoyJ</i> | 0.55 | 0.03 | 0.61 | 0.09 |
| BSU21000 | <i>yonT</i> | 0.93 | 0.80 | 1.08 | 0.81 |

|          |             |      |      |      |      |
|----------|-------------|------|------|------|------|
| BSU21020 | <i>yonR</i> | 1.15 | 0.93 | 1.65 | 0.27 |
| BSU21050 | <i>yonN</i> | 0.45 | 0.00 | 0.42 | 0.02 |
| BSU21080 | <i>yonI</i> | 1.34 | 0.45 | 1.40 | 0.52 |
| BSU21140 | <i>yonC</i> | 1.09 | 0.55 | 0.92 | 0.80 |
| BSU21150 | <i>yonB</i> | 0.76 | 0.00 | 0.79 | 0.26 |
| BSU21160 | <i>yonA</i> | 1.19 | 0.41 | 1.33 | 0.47 |
| BSU21170 | <i>yomZ</i> | 0.75 | 0.03 | 0.86 | 0.66 |
| BSU21180 | <i>yomY</i> | 1.25 | 0.59 | 1.24 | 0.52 |
| BSU21220 | <i>yomU</i> | 0.65 | 0.03 | 0.78 | 0.40 |
| BSU21229 | <i>youA</i> | 0.92 | 0.66 | 1.09 | 0.90 |
| BSU21230 | <i>yomT</i> | 1.46 | 0.08 | 1.30 | 0.28 |
| BSU21320 | <i>yomL</i> | 1.33 | 0.00 | 2.34 | 0.08 |
| BSU21329 | <i>youB</i> | 0.66 | 0.07 | 0.88 | 0.58 |
| BSU21340 | <i>yomJ</i> | 0.70 | 0.22 | 0.67 | 0.24 |
| BSU21440 | <i>bdbB</i> | 0.82 | 0.36 | 0.94 | 0.91 |
| BSU21450 | <i>yolJ</i> | 0.71 | 0.18 | 0.65 | 0.42 |
| BSU21460 | <i>bdbA</i> | 0.57 | 0.06 | 0.78 | 0.67 |
| BSU21470 | <i>sunT</i> | 1.09 | 0.72 | 8.17 | 0.07 |
| BSU21480 | <i>sunA</i> | 1.15 | 0.59 | 0.95 | 0.73 |
| BSU21490 | <i>sunI</i> | 0.59 | 0.17 | 0.67 | 0.68 |
| BSU21530 | <i>yolB</i> | 1.91 | 0.01 | 2.79 | 0.06 |
| BSU21540 | <i>yolA</i> | 0.81 | 0.09 | 0.91 | 0.66 |
| BSU21550 | <i>yokL</i> | 0.95 | 0.83 | 1.13 | 0.85 |
| BSU21560 | <i>yokK</i> | 0.75 | 0.29 | 0.79 | 0.47 |
| BSU21590 | <i>yokH</i> | 1.38 | 0.17 | 2.04 | 0.39 |
| BSU21600 | <i>yokG</i> | 0.63 | 0.02 | 0.82 | 0.44 |
| BSU21610 | <i>yokF</i> | 0.62 | 0.02 | 0.86 | 0.42 |
| BSU21620 | <i>yokE</i> | 0.60 | 0.01 | 0.80 | 0.42 |
| BSU21680 | <i>yppQ</i> | 1.32 | 0.24 | 1.18 | 0.12 |
| BSU21690 | <i>msrA</i> | 0.83 | 0.14 | 1.55 | 0.06 |
| BSU21700 | <i>yppP</i> | 0.57 | 0.03 | 0.65 | 0.16 |
| BSU21720 | <i>yppM</i> | 1.94 | 0.00 | 1.77 | 0.00 |
| BSU21730 | <i>yppS</i> | 0.68 | 0.00 | 0.81 | 0.30 |
| BSU21740 | <i>yppR</i> | 1.04 | 0.71 | 1.48 | 0.07 |
| BSU21760 | <i>yppP</i> | 1.30 | 0.12 | 1.27 | 0.11 |
| BSU21770 | <i>ilvA</i> | 0.42 | 0.00 | 0.39 | 0.01 |
| BSU21780 | <i>yplP</i> | 0.70 | 0.05 | 0.56 | 0.01 |
| BSU21790 | <i>yplQ</i> | 0.94 | 0.72 | 1.34 | 0.05 |
| BSU21800 | <i>ypkP</i> | 1.34 | 0.01 | 0.93 | 0.60 |
| BSU21810 | <i>dfrA</i> | 0.80 | 0.02 | 1.07 | 0.89 |
| BSU21820 | <i>thyA</i> | 0.68 | 0.00 | 0.58 | 0.00 |
| BSU21830 | <i>yppQ</i> | 1.06 | 0.33 | 1.31 | 0.08 |
| BSU21840 | <i>yppP</i> | 0.43 | 0.00 | 0.50 | 0.00 |
| BSU21850 | <i>yppP</i> | 0.87 | 0.21 | 0.86 | 0.13 |
| BSU21860 | <i>yppP</i> | 0.67 | 0.02 | 0.97 | 0.85 |
| BSU21880 | <i>yppR</i> | 0.42 | 0.00 | 0.50 | 0.00 |
| BSU21920 | <i>ugtP</i> | 0.36 | 0.00 | 0.54 | 0.01 |

|          |             |      |      |      |      |
|----------|-------------|------|------|------|------|
| BSU21930 | <i>cspD</i> | 1.52 | 0.01 | 1.97 | 0.02 |
| BSU21940 | <i>degR</i> | 0.66 | 0.04 | 0.08 | 0.04 |
| BSU22000 | <i>sspL</i> | 1.56 | 0.05 | 1.15 | 0.48 |
| BSU22010 | <i>exoA</i> | 0.49 | 0.00 | 0.68 | 0.01 |
| BSU22019 | <i>ypzF</i> | 2.28 | 0.02 | 2.49 | 0.02 |
| BSU22020 | <i>ypbS</i> | 0.83 | 0.01 | 0.82 | 0.12 |
| BSU22060 | <i>pbuX</i> | 0.70 | 0.22 | 1.06 | 0.56 |
| BSU22080 | <i>ypwA</i> | 0.79 | 0.04 | 0.86 | 0.30 |
| BSU22130 | <i>kdul</i> | 1.06 | 0.57 | 0.93 | 0.23 |
| BSU22150 | <i>ypvA</i> | 0.49 | 0.00 | 0.86 | 0.04 |
| BSU22160 | <i>yptA</i> | 1.42 | 0.03 | 1.63 | 0.09 |
| BSU22169 | <i>ypzG</i> | 0.99 | 0.94 | 1.04 | 0.74 |
| BSU22170 | <i>ypsC</i> | 0.76 | 0.10 | 0.64 | 0.00 |
| BSU22180 | <i>ypsB</i> | 0.61 | 0.06 | 0.71 | 0.57 |
| BSU22190 | <i>ypsA</i> | 1.67 | 0.03 | 1.88 | 0.04 |
| BSU22200 | <i>cotD</i> | 0.82 | 0.20 | 0.86 | 0.20 |
| BSU22210 | <i>yprB</i> | 1.03 | 0.59 | 1.03 | 0.99 |
| BSU22220 | <i>yprA</i> | 0.50 | 0.00 | 0.51 | 0.00 |
| BSU22230 | <i>ypqE</i> | 0.81 | 0.03 | 1.10 | 0.37 |
| BSU22260 | <i>yppF</i> | 0.79 | 0.52 | 0.78 | 0.22 |
| BSU22270 | <i>yppE</i> | 1.08 | 0.35 | 1.33 | 0.17 |
| BSU22300 | <i>yppC</i> | 4.16 | 0.00 | 3.87 | 0.00 |
| BSU22310 | <i>recU</i> | 0.71 | 0.03 | 1.23 | 0.43 |
| BSU22320 | <i>ponA</i> | 0.33 | 0.00 | 0.56 | 0.01 |
| BSU22330 | <i>ypoC</i> | 1.88 | 0.00 | 2.15 | 0.00 |
| BSU22340 | <i>nth</i>  | 0.73 | 0.04 | 0.63 | 0.02 |
| BSU22350 | <i>dnaD</i> | 1.04 | 0.72 | 0.86 | 0.53 |
| BSU22360 | <i>asnC</i> | 0.76 | 0.05 | 0.87 | 0.17 |
| BSU22370 | <i>aspB</i> | 0.51 | 0.00 | 0.90 | 0.07 |
| BSU22380 | <i>ypmB</i> | 0.83 | 0.20 | 0.91 | 0.51 |
| BSU22390 | <i>ypmA</i> | 1.03 | 0.47 | 1.04 | 0.92 |
| BSU22400 | <i>dinG</i> | 0.32 | 0.00 | 0.72 | 0.01 |
| BSU22410 | <i>panD</i> | 2.81 | 0.00 | 2.50 | 0.00 |
| BSU22420 | <i>panC</i> | 0.77 | 0.00 | 0.96 | 0.32 |
| BSU22430 | <i>panB</i> | 0.75 | 0.01 | 0.87 | 0.27 |
| BSU22440 | <i>birA</i> | 1.44 | 0.01 | 0.94 | 0.58 |
| BSU22450 | <i>cca</i>  | 1.16 | 0.04 | 1.24 | 0.10 |
| BSU22460 | <i>ypjH</i> | 1.08 | 0.23 | 1.14 | 0.20 |
| BSU22470 | <i>ypjG</i> | 0.79 | 0.05 | 0.93 | 0.47 |
| BSU22480 | <i>mgsA</i> | 0.94 | 0.46 | 0.84 | 0.14 |
| BSU22490 | <i>dapB</i> | 0.57 | 0.01 | 0.76 | 0.01 |
| BSU22500 | <i>ypjD</i> | 0.85 | 0.58 | 0.86 | 0.43 |
| BSU22510 | <i>ypjC</i> | 1.31 | 0.10 | 1.59 | 0.05 |
| BSU22540 | <i>qcrC</i> | 0.60 | 0.00 | 0.87 | 0.03 |
| BSU22550 | <i>qcrB</i> | 1.12 | 0.37 | 1.05 | 0.36 |
| BSU22560 | <i>qcrA</i> | 0.74 | 0.02 | 0.69 | 0.00 |
| BSU22570 | <i>ypiF</i> | 1.07 | 0.69 | 1.01 | 1.00 |

|          |             |      |      |      |      |
|----------|-------------|------|------|------|------|
| BSU22580 | <i>ypiB</i> | 0.75 | 0.03 | 1.08 | 0.77 |
| BSU22590 | <i>ypiA</i> | 0.44 | 0.01 | 0.60 | 0.03 |
| BSU22600 | <i>aroE</i> | 0.68 | 0.07 | 0.81 | 0.04 |
| BSU22610 | <i>tyrA</i> | 0.76 | 0.06 | 1.02 | 0.97 |
| BSU22620 | <i>hisC</i> | 0.65 | 0.03 | 1.00 | 0.90 |
| BSU22630 | <i>trpA</i> | 0.12 | 0.00 | 0.73 | 0.14 |
| BSU22640 | <i>trpB</i> | 0.93 | 0.71 | 0.65 | 0.01 |
| BSU22650 | <i>trpF</i> | 1.07 | 0.79 | 0.85 | 0.04 |
| BSU22660 | <i>trpC</i> | 0.71 | 0.15 | 0.89 | 0.12 |
| BSU22670 | <i>trpD</i> | 1.55 | 0.07 | 1.03 | 0.78 |
| BSU22680 | <i>trpE</i> | 0.75 | 0.12 | 0.59 | 0.06 |
| BSU22690 | <i>aroH</i> | 0.90 | 0.15 | 0.81 | 0.22 |
| BSU22700 | <i>aroB</i> | 0.73 | 0.00 | 0.80 | 0.04 |
| BSU22710 | <i>aroF</i> | 0.50 | 0.02 | 0.54 | 0.00 |
| BSU22730 | <i>ndk</i>  | 1.12 | 0.39 | 1.52 | 0.00 |
| BSU22740 | <i>hepT</i> | 0.72 | 0.03 | 1.06 | 0.93 |
| BSU22750 | <i>ubiE</i> | 0.65 | 0.01 | 0.83 | 0.15 |
| BSU22760 | <i>hepS</i> | 0.88 | 0.45 | 0.83 | 0.58 |
| BSU22770 | <i>mtrB</i> | 1.17 | 0.09 | 1.20 | 0.10 |
| BSU22780 | <i>folE</i> | 0.94 | 0.55 | 0.86 | 0.21 |
| BSU22790 | <i>hbs</i>  | 1.17 | 0.11 | 1.37 | 0.03 |
| BSU22810 | <i>yphF</i> | 1.21 | 0.00 | 1.45 | 0.05 |
| BSU22820 | <i>yphE</i> | 0.67 | 0.06 | 0.75 | 0.01 |
| BSU22830 | <i>gpsA</i> | 0.67 | 0.00 | 0.78 | 0.01 |
| BSU22840 | <i>engA</i> | 0.67 | 0.00 | 0.62 | 0.00 |
| BSU22870 | <i>fni</i>  | 7.48 | 0.00 | 2.78 | 0.00 |
| BSU22880 | <i>rpsA</i> | 0.74 | 0.00 | 0.86 | 0.15 |
| BSU22890 | <i>cmk</i>  | 0.47 | 0.00 | 0.59 | 0.00 |
| BSU22900 | <i>ypfB</i> | 1.22 | 0.41 | 0.99 | 0.94 |
| BSU22940 | <i>prsW</i> | 1.02 | 0.84 | 1.24 | 0.35 |
| BSU22950 | <i>ypdA</i> | 0.63 | 0.00 | 0.79 | 0.18 |
| BSU22960 | <i>gudB</i> | 0.70 | 0.01 | 1.22 | 0.15 |
| BSU22970 | <i>ypbH</i> | 0.92 | 0.36 | 0.99 | 0.77 |
| BSU22980 | <i>ypbG</i> | 0.50 | 0.00 | 0.61 | 0.00 |
| BSU23000 | <i>ypbE</i> | 5.16 | 0.00 | 1.75 | 0.05 |
| BSU23010 | <i>ypbD</i> | 0.76 | 0.01 | 0.79 | 0.07 |
| BSU23020 | <i>recQ</i> | 0.49 | 0.00 | 0.52 | 0.00 |
| BSU23040 | <i>fer</i>  | 1.68 | 0.02 | 1.86 | 0.03 |
| BSU23050 | <i>fmnP</i> | 1.10 | 0.70 | 1.47 | 0.23 |
| BSU23060 | <i>ypzE</i> | 0.64 | 0.04 | 0.69 | 0.20 |
| BSU23070 | <i>serA</i> | 0.47 | 0.00 | 0.56 | 0.00 |
| BSU23090 | <i>rsiX</i> | 0.21 | 0.00 | 0.97 | 0.60 |
| BSU23100 | <i>sigX</i> | 1.42 | 0.06 | 0.70 | 0.16 |
| BSU23110 | <i>resE</i> | 1.09 | 0.29 | 1.35 | 0.01 |
| BSU23120 | <i>resD</i> | 0.73 | 0.03 | 0.81 | 0.01 |
| BSU23130 | <i>resC</i> | 1.05 | 0.52 | 1.03 | 0.72 |
| BSU23140 | <i>resB</i> | 0.91 | 0.20 | 1.04 | 0.81 |

|          |             |      |      |      |      |
|----------|-------------|------|------|------|------|
| BSU23150 | <i>resA</i> | 1.14 | 0.06 | 1.42 | 0.01 |
| BSU23160 | <i>rluB</i> | 0.91 | 0.24 | 0.96 | 0.53 |
| BSU23200 | <i>ypul</i> | 1.42 | 0.01 | 1.63 | 0.01 |
| BSU23210 | <i>spcB</i> | 0.67 | 0.01 | 1.08 | 0.79 |
| BSU23220 | <i>scpA</i> | 0.74 | 0.01 | 0.97 | 0.65 |
| BSU23240 | <i>ypzK</i> | 1.28 | 0.06 | 1.19 | 0.57 |
| BSU23250 | <i>ribH</i> | 0.71 | 0.01 | 0.85 | 0.22 |
| BSU23260 | <i>ribA</i> | 0.66 | 0.00 | 0.84 | 0.07 |
| BSU23270 | <i>ribE</i> | 0.73 | 0.01 | 0.93 | 0.16 |
| BSU23280 | <i>ribD</i> | 1.47 | 0.01 | 1.48 | 0.03 |
| BSU23300 | <i>ypuD</i> | 1.03 | 0.96 | 1.19 | 0.40 |
| BSU23310 | <i>sipS</i> | 0.90 | 0.18 | 1.15 | 0.36 |
| BSU23350 | <i>ypzD</i> | 0.60 | 0.01 | 0.73 | 0.43 |
| BSU23360 | <i>ppiB</i> | 1.39 | 0.09 | 1.47 | 0.14 |
| BSU23370 | <i>ypuA</i> | 1.11 | 0.26 | 1.81 | 0.01 |
| BSU23380 | <i>lysA</i> | 0.51 | 0.02 | 0.63 | 0.00 |
| BSU23490 | <i>pupG</i> | 0.69 | 0.00 | 0.94 | 0.56 |
| BSU23500 | <i>drm</i>  | 0.83 | 0.05 | 0.72 | 0.01 |
| BSU23510 | <i>xerD</i> | 1.36 | 0.00 | 1.10 | 0.07 |
| BSU23520 | <i>fur</i>  | 0.82 | 0.14 | 1.13 | 0.42 |
| BSU23550 | <i>mleA</i> | 0.81 | 0.08 | 1.12 | 0.11 |
| BSU23560 | <i>mleN</i> | 0.63 | 0.00 | 0.58 | 0.00 |
| BSU23570 | <i>aspA</i> | 0.57 | 0.00 | 0.73 | 0.00 |
| BSU23580 | <i>ansA</i> | 0.30 | 0.00 | 0.44 | 0.00 |
| BSU23590 | <i>ansR</i> | 0.58 | 0.02 | 0.92 | 0.14 |
| BSU23600 | <i>yqxK</i> | 1.27 | 0.12 | 1.16 | 0.09 |
| BSU23610 | <i>nudF</i> | 0.80 | 0.00 | 0.84 | 0.23 |
| BSU23620 | <i>yqkF</i> | 0.29 | 0.00 | 0.48 | 0.00 |
| BSU23650 | <i>yqkC</i> | 1.83 | 0.00 | 2.08 | 0.00 |
| BSU23660 | <i>yqkB</i> | 0.30 | 0.00 | 0.27 | 0.00 |
| BSU23720 | <i>yqzH</i> | 0.65 | 0.06 | 0.64 | 0.04 |
| BSU23740 | <i>yqjU</i> | 0.43 | 0.00 | 0.37 | 0.00 |
| BSU23750 | <i>yqjT</i> | 0.74 | 0.05 | 0.67 | 0.04 |
| BSU23760 | <i>coaA</i> | 0.64 | 0.00 | 0.84 | 0.12 |
| BSU23820 | <i>yqjM</i> | 1.06 | 0.42 | 1.15 | 0.10 |
| BSU23830 | <i>yqjL</i> | 1.19 | 0.16 | 1.18 | 0.29 |
| BSU23850 | <i>zwf</i>  | 0.50 | 0.01 | 0.55 | 0.00 |
| BSU23860 | <i>yqjI</i> | 0.80 | 0.09 | 0.81 | 0.10 |
| BSU23880 | <i>yqzJ</i> | 0.66 | 0.00 | 0.81 | 0.21 |
| BSU23890 | <i>yqjG</i> | 1.56 | 0.01 | 1.63 | 0.06 |
| BSU23900 | <i>yqjF</i> | 1.22 | 0.06 | 1.32 | 0.03 |
| BSU23910 | <i>yqjE</i> | 0.69 | 0.04 | 1.07 | 0.57 |
| BSU23920 | <i>yqjD</i> | 0.18 | 0.00 | 0.13 | 0.00 |
| BSU23950 | <i>yqjA</i> | 0.60 | 0.00 | 1.30 | 0.02 |
| BSU23990 | <i>yqiW</i> | 0.68 | 0.02 | 0.86 | 0.00 |
| BSU24000 | <i>bmrU</i> | 0.70 | 0.02 | 0.47 | 0.00 |
| BSU24010 | <i>bmr</i>  | 1.02 | 0.98 | 1.00 | 0.99 |

|          |              |      |      |      |      |
|----------|--------------|------|------|------|------|
| BSU24030 | <i>bkdB</i>  | 0.66 | 0.01 | 1.09 | 0.57 |
| BSU24040 | <i>bkdAB</i> | 0.89 | 0.45 | 1.00 | 0.97 |
| BSU24050 | <i>bkdAA</i> | 0.65 | 0.04 | 0.66 | 0.03 |
| BSU24060 | <i>lpdV</i>  | 0.94 | 0.70 | 0.85 | 0.18 |
| BSU24070 | <i>buk</i>   | 1.08 | 0.49 | 0.97 | 0.76 |
| BSU24080 | <i>bcd</i>   | 0.79 | 0.21 | 0.75 | 0.12 |
| BSU24090 | <i>ptb</i>   | 0.95 | 0.38 | 1.19 | 0.42 |
| BSU24100 | <i>bkdR</i>  | 0.59 | 0.00 | 1.09 | 0.27 |
| BSU24110 | <i>yqzF</i>  | 1.01 | 0.90 | 1.23 | 0.14 |
| BSU24210 | <i>yqiG</i>  | 0.91 | 0.37 | 0.87 | 0.04 |
| BSU24220 | <i>spo0A</i> | 0.53 | 0.00 | 0.76 | 0.01 |
| BSU24240 | <i>recN</i>  | 0.64 | 0.00 | 0.94 | 0.47 |
| BSU24250 | <i>ahrC</i>  | 0.68 | 0.02 | 0.83 | 0.10 |
| BSU24260 | <i>yqxC</i>  | 1.04 | 0.49 | 0.80 | 0.00 |
| BSU24270 | <i>dxs</i>   | 0.38 | 0.00 | 0.42 | 0.00 |
| BSU24280 | <i>ispA</i>  | 0.68 | 0.00 | 0.67 | 0.04 |
| BSU24290 | <i>xseB</i>  | 0.99 | 0.99 | 1.03 | 0.76 |
| BSU24300 | <i>xseA</i>  | 0.73 | 0.03 | 1.06 | 0.48 |
| BSU24310 | <i>fold</i>  | 1.12 | 0.23 | 1.53 | 0.01 |
| BSU24320 | <i>nusB</i>  | 0.80 | 0.10 | 1.04 | 0.69 |
| BSU24330 | <i>yqhY</i>  | 0.93 | 0.62 | 0.93 | 0.59 |
| BSU24340 | <i>accC</i>  | 0.39 | 0.00 | 0.44 | 0.00 |
| BSU24350 | <i>accB</i>  | 0.41 | 0.01 | 0.42 | 0.00 |
| BSU24450 | <i>efp</i>   | 1.06 | 0.64 | 1.34 | 0.00 |
| BSU24460 | <i>yqhT</i>  | 0.39 | 0.00 | 0.12 | 0.00 |
| BSU24470 | <i>yqhS</i>  | 0.91 | 0.16 | 0.89 | 0.31 |
| BSU24490 | <i>yqhQ</i>  | 0.59 | 0.00 | 0.69 | 0.00 |
| BSU24500 | <i>yqhP</i>  | 0.73 | 0.07 | 0.96 | 0.54 |
| BSU24520 | <i>mntR</i>  | 1.28 | 0.08 | 1.89 | 0.05 |
| BSU24530 | <i>yqhM</i>  | 0.30 | 0.00 | 0.42 | 0.01 |
| BSU24540 | <i>yqhL</i>  | 0.64 | 0.02 | 0.53 | 0.04 |
| BSU24550 | <i>gcvPB</i> | 0.94 | 0.74 | 1.10 | 0.47 |
| BSU24560 | <i>gcvPA</i> | 0.81 | 0.40 | 0.84 | 0.15 |
| BSU24570 | <i>gcvT</i>  | 0.82 | 0.15 | 1.01 | 0.88 |
| BSU24600 | <i>sinI</i>  | 0.91 | 0.22 | 0.86 | 0.45 |
| BSU24610 | <i>sinR</i>  | 1.06 | 0.33 | 1.50 | 0.09 |
| BSU24620 | <i>tasA</i>  | 1.02 | 0.97 | 1.07 | 0.86 |
| BSU24760 | <i>rsbRD</i> | 0.80 | 0.16 | 0.89 | 0.37 |
| BSU24770 | <i>mgsR</i>  | 0.70 | 0.11 | 0.87 | 0.53 |
| BSU24780 | <i>yqgY</i>  | 1.28 | 0.18 | 1.32 | 0.59 |
| BSU24790 | <i>yqgX</i>  | 1.03 | 0.82 | 0.96 | 0.64 |
| BSU24800 | <i>yqgW</i>  | 1.49 | 0.26 | 1.52 | 0.17 |
| BSU24810 | <i>yqgV</i>  | 1.31 | 0.06 | 1.35 | 0.03 |
| BSU24820 | <i>yqgU</i>  | 0.75 | 0.08 | 1.24 | 0.01 |
| BSU24840 | <i>yqgS</i>  | 0.71 | 0.00 | 1.34 | 0.13 |
| BSU24850 | <i>glcK</i>  | 0.76 | 0.01 | 0.85 | 0.15 |
| BSU24860 | <i>yqgQ</i>  | 0.89 | 0.49 | 0.96 | 0.79 |

|          |             |      |      |      |      |
|----------|-------------|------|------|------|------|
| BSU24880 | <i>yqgO</i> | 2.28 | 0.01 | 2.09 | 0.07 |
| BSU24890 | <i>yqgN</i> | 0.80 | 0.03 | 0.86 | 0.08 |
| BSU24900 | <i>rpmG</i> | 1.28 | 0.55 | 1.33 | 0.41 |
| BSU24930 | <i>yqzD</i> | 0.65 | 0.00 | 0.86 | 0.29 |
| BSU24940 | <i>yqzC</i> | 1.23 | 0.12 | 1.37 | 0.06 |
| BSU24990 | <i>pstS</i> | 0.94 | 0.84 | 0.93 | 0.46 |
| BSU25000 | <i>pbpA</i> | 0.44 | 0.00 | 0.70 | 0.01 |
| BSU25020 | <i>sodA</i> | 1.08 | 0.80 | 1.29 | 0.05 |
| BSU25030 | <i>yqgC</i> | 0.98 | 0.79 | 1.03 | 0.93 |
| BSU25040 | <i>yqgB</i> | 0.88 | 0.36 | 1.47 | 0.48 |
| BSU25050 | <i>yqgA</i> | 0.74 | 0.01 | 0.91 | 0.83 |
| BSU25070 | <i>ispG</i> | 0.39 | 0.01 | 0.43 | 0.00 |
| BSU25080 | <i>yqfX</i> | 1.40 | 0.04 | 1.27 | 0.12 |
| BSU25090 | <i>yqfW</i> | 0.92 | 0.59 | 1.16 | 0.43 |
| BSU25100 | <i>zur</i>  | 1.17 | 0.29 | 1.16 | 0.48 |
| BSU25110 | <i>yqfU</i> | 0.42 | 0.00 | 0.47 | 0.01 |
| BSU25130 | <i>yqfS</i> | 1.14 | 0.30 | 1.41 | 0.01 |
| BSU25140 | <i>csHb</i> | 0.70 | 0.05 | 0.64 | 0.00 |
| BSU25160 | <i>ispH</i> | 0.62 | 0.03 | 0.81 | 0.06 |
| BSU25170 | <i>yqfO</i> | 0.69 | 0.01 | 0.92 | 0.30 |
| BSU25180 | <i>trmK</i> | 0.55 | 0.00 | 0.65 | 0.00 |
| BSU25190 | <i>cccA</i> | 1.51 | 0.02 | 1.28 | 0.21 |
| BSU25200 | <i>sigA</i> | 0.83 | 0.05 | 0.97 | 0.63 |
| BSU25210 | <i>dnaG</i> | 1.42 | 0.00 | 0.94 | 0.32 |
| BSU25220 | <i>antE</i> | 0.88 | 0.14 | 0.80 | 0.20 |
| BSU25230 | <i>yqxD</i> | 0.77 | 0.00 | 0.86 | 0.32 |
| BSU25240 | <i>yqfL</i> | 0.82 | 0.00 | 1.01 | 0.81 |
| BSU25250 | <i>ccpN</i> | 0.83 | 0.02 | 1.04 | 0.71 |
| BSU25260 | <i>glyS</i> | 0.68 | 0.02 | 0.90 | 0.02 |
| BSU25270 | <i>glyQ</i> | 0.64 | 0.02 | 0.75 | 0.02 |
| BSU25280 | <i>recO</i> | 1.26 | 0.02 | 1.21 | 0.48 |
| BSU25289 | <i>yqzL</i> | 1.02 | 0.91 | 0.82 | 0.51 |
| BSU25290 | <i>era</i>  | 0.70 | 0.00 | 0.63 | 0.00 |
| BSU25300 | <i>cdd</i>  | 0.92 | 0.58 | 1.16 | 0.25 |
| BSU25310 | <i>dgkA</i> | 1.88 | 0.00 | 1.54 | 0.01 |
| BSU25320 | <i>yqfG</i> | 0.81 | 0.02 | 0.75 | 0.01 |
| BSU25330 | <i>yqfF</i> | 0.42 | 0.00 | 0.54 | 0.00 |
| BSU25340 | <i>phoH</i> | 0.81 | 0.07 | 0.69 | 0.04 |
| BSU25370 | <i>yqfB</i> | 1.64 | 0.04 | 1.77 | 0.00 |
| BSU25380 | <i>yqfA</i> | 0.85 | 0.25 | 0.75 | 0.03 |
| BSU25390 | <i>yqeZ</i> | 0.94 | 0.48 | 0.88 | 0.07 |
| BSU25400 | <i>yqeY</i> | 1.89 | 0.00 | 2.30 | 0.01 |
| BSU25410 | <i>rpsU</i> | 0.84 | 0.07 | 0.83 | 0.20 |
| BSU25430 | <i>rimO</i> | 0.65 | 0.00 | 0.96 | 0.55 |
| BSU25440 | <i>yqeU</i> | 0.56 | 0.00 | 0.49 | 0.00 |
| BSU25450 | <i>prmA</i> | 1.47 | 0.00 | 0.81 | 0.10 |
| BSU25460 | <i>dnal</i> | 0.76 | 0.05 | 0.84 | 0.20 |

|          |              |      |      |      |      |
|----------|--------------|------|------|------|------|
| BSU25470 | <i>dnaK</i>  | 0.73 | 0.09 | 0.90 | 0.34 |
| BSU25480 | <i>grpE</i>  | 0.80 | 0.15 | 0.70 | 0.04 |
| BSU25490 | <i>hrcA</i>  | 0.63 | 0.03 | 0.88 | 0.29 |
| BSU25500 | <i>hemN</i>  | 0.58 | 0.00 | 0.62 | 0.00 |
| BSU25510 | <i>lepA</i>  | 0.25 | 0.00 | 0.36 | 0.00 |
| BSU25550 | <i>rpsT</i>  | 1.72 | 0.01 | 1.78 | 0.05 |
| BSU25560 | <i>holA</i>  | 0.59 | 0.01 | 1.00 | 0.70 |
| BSU25569 | <i>yqzM</i>  | 0.84 | 0.62 | 0.68 | 0.27 |
| BSU25580 | <i>comEB</i> | 0.37 | 0.00 | 0.59 | 0.00 |
| BSU25610 | <i>yqeM</i>  | 1.32 | 0.01 | 1.27 | 0.04 |
| BSU25620 | <i>yqeL</i>  | 0.76 | 0.00 | 0.74 | 0.04 |
| BSU25630 | <i>yqeK</i>  | 0.74 | 0.00 | 0.92 | 0.53 |
| BSU25640 | <i>nadD</i>  | 1.08 | 0.51 | 1.12 | 0.23 |
| BSU25650 | <i>yqeI</i>  | 0.91 | 0.38 | 0.98 | 0.85 |
| BSU25660 | <i>aroE</i>  | 1.02 | 0.79 | 0.95 | 0.34 |
| BSU25670 | <i>yqeH</i>  | 0.40 | 0.00 | 0.52 | 0.00 |
| BSU25680 | <i>yqeG</i>  | 0.66 | 0.01 | 0.63 | 0.05 |
| BSU25690 | <i>sda</i>   | 1.10 | 0.16 | 1.44 | 0.52 |
| BSU25700 | <i>yqeF</i>  | 0.55 | 0.01 | 0.75 | 0.01 |
| BSU25720 | <i>yqeD</i>  | 1.38 | 0.07 | 1.48 | 0.07 |
| BSU25740 | <i>yqeB</i>  | 0.67 | 0.05 | 0.70 | 0.09 |
| BSU25840 | <i>phrE</i>  | 1.12 | 0.73 | 1.38 | 0.18 |
| BSU25870 | <i>yqcF</i>  | 1.08 | 0.17 | 1.51 | 0.28 |
| BSU26050 | <i>yqdB</i>  | 0.26 | 0.09 | 0.61 | 0.21 |
| BSU26230 | <i>yqaP</i>  | 0.54 | 0.00 | 0.68 | 0.46 |
| BSU26610 | <i>yrkA</i>  | 0.63 | 0.01 | 0.92 | 0.52 |
| BSU26640 | <i>yrdP</i>  | 0.55 | 0.05 | 0.89 | 0.82 |
| BSU26650 | <i>czcD</i>  | 0.52 | 0.05 | 0.54 | 0.02 |
| BSU26680 | <i>yrdK</i>  | 1.63 | 0.02 | 1.47 | 0.00 |
| BSU26760 | <i>yrdC</i>  | 0.36 | 0.00 | 0.66 | 0.20 |
| BSU26820 | <i>yrdD</i>  | 1.08 | 0.22 | 1.82 | 0.00 |
| BSU26890 | <i>csn</i>   | 0.64 | 0.02 | 0.80 | 0.11 |
| BSU26900 | <i>yraL</i>  | 1.44 | 0.04 | 4.07 | 0.02 |
| BSU27020 | <i>yraA</i>  | 0.71 | 0.01 | 0.91 | 0.26 |
| BSU27100 | <i>yrhP</i>  | 0.95 | 0.62 | 3.11 | 0.01 |
| BSU27150 | <i>yrhK</i>  | 0.94 | 0.56 | 0.77 | 0.39 |
| BSU27160 | <i>cypB</i>  | 0.61 | 0.02 | 0.76 | 0.03 |
| BSU27180 | <i>yrhH</i>  | 0.70 | 0.13 | 1.00 | 0.96 |
| BSU27190 | <i>yrzI</i>  | 0.69 | 0.08 | 0.67 | 0.28 |
| BSU27200 | <i>yrhG</i>  | 0.90 | 0.14 | 1.06 | 0.37 |
| BSU27210 | <i>yrhF</i>  | 0.89 | 0.67 | 1.07 | 0.69 |
| BSU27220 | <i>yrhE</i>  | 0.26 | 0.00 | 0.29 | 0.00 |
| BSU27230 | <i>yrhD</i>  | 1.30 | 0.21 | 1.50 | 0.00 |
| BSU27270 | <i>mtn</i>   | 0.98 | 0.87 | 1.53 | 0.03 |
| BSU27280 | <i>yrrT</i>  | 0.04 | 0.00 | 0.01 | 0.00 |
| BSU27290 | <i>yrzA</i>  | 1.07 | 0.71 | 1.22 | 0.64 |
| BSU27300 | <i>yrrS</i>  | 0.81 | 0.15 | 1.14 | 0.39 |



|          |              |      |      |      |      |
|----------|--------------|------|------|------|------|
| BSU27320 | <i>greA</i>  | 0.87 | 0.09 | 1.12 | 0.38 |
| BSU27330 | <i>udk</i>   | 1.05 | 0.69 | 1.01 | 0.93 |
| BSU27340 | <i>yrrO</i>  | 0.57 | 0.00 | 0.68 | 0.00 |
| BSU27350 | <i>yrrN</i>  | 0.73 | 0.00 | 1.08 | 0.49 |
| BSU27360 | <i>yrrM</i>  | 0.84 | 0.00 | 1.33 | 0.03 |
| BSU27370 | <i>yrrL</i>  | 0.90 | 0.51 | 0.97 | 0.84 |
| BSU27380 | <i>yrzB</i>  | 1.43 | 0.00 | 1.31 | 0.09 |
| BSU27390 | <i>yrrK</i>  | 0.34 | 0.00 | 0.45 | 0.00 |
| BSU27400 | <i>yrzL</i>  | 0.87 | 0.05 | 0.94 | 0.40 |
| BSU27410 | <i>alaS</i>  | 0.53 | 0.00 | 0.48 | 0.00 |
| BSU27468 | <i>yrzQ</i>  | 2.89 | 0.03 | 3.23 | 0.02 |
| BSU27469 | <i>yrzR</i>  | 0.86 | 0.54 | 0.98 | 0.87 |
| BSU27470 | <i>yrrD</i>  | 0.56 | 0.00 | 0.49 | 0.00 |
| BSU27480 | <i>yrrC</i>  | 0.56 | 0.00 | 0.89 | 0.07 |
| BSU27490 | <i>yrrB</i>  | 0.69 | 0.01 | 0.76 | 0.07 |
| BSU27500 | <i>mnmA</i>  | 0.77 | 0.13 | 1.09 | 0.33 |
| BSU27510 | <i>iscS</i>  | 0.47 | 0.01 | 0.37 | 0.01 |
| BSU27520 | <i>cymR</i>  | 0.49 | 0.01 | 0.37 | 0.00 |
| BSU27540 | <i>yrvM</i>  | 0.64 | 0.01 | 0.90 | 0.40 |
| BSU27550 | <i>aspS</i>  | 0.49 | 0.00 | 0.55 | 0.01 |
| BSU27560 | <i>hisS</i>  | 0.59 | 0.00 | 0.48 | 0.00 |
| BSU27570 | <i>yrzK</i>  | 1.52 | 0.12 | 1.55 | 0.06 |
| BSU27580 | <i>yrvJ</i>  | 0.93 | 0.51 | 1.01 | 0.97 |
| BSU27590 | <i>yrvI</i>  | 2.05 | 0.00 | 2.34 | 0.02 |
| BSU27600 | <i>relA</i>  | 0.36 | 0.00 | 0.49 | 0.00 |
| BSU27610 | <i>apt</i>   | 0.82 | 0.08 | 0.92 | 0.47 |
| BSU27620 | <i>recJ</i>  | 0.50 | 0.00 | 0.81 | 0.05 |
| BSU27630 | <i>yrvD</i>  | 1.14 | 0.40 | 1.61 | 0.15 |
| BSU27640 | <i>yrvC</i>  | 0.90 | 0.09 | 0.96 | 0.57 |
| BSU27650 | <i>secDF</i> | 0.48 | 0.00 | 0.76 | 0.00 |
| BSU27660 | <i>comN</i>  | 0.56 | 0.01 | 0.49 | 0.02 |
| BSU27700 | <i>yajC</i>  | 1.73 | 0.04 | 1.80 | 0.05 |
| BSU27710 | <i>tgt</i>   | 0.48 | 0.00 | 0.48 | 0.00 |
| BSU27720 | <i>queA</i>  | 0.59 | 0.00 | 0.68 | 0.00 |
| BSU27729 | <i>yrzS</i>  | 1.01 | 0.95 | 1.47 | 0.41 |
| BSU27730 | <i>ruvB</i>  | 0.67 | 0.03 | 0.77 | 0.16 |
| BSU27740 | <i>ruvA</i>  | 0.61 | 0.00 | 0.58 | 0.01 |
| BSU27750 | <i>bofC</i>  | 1.47 | 0.00 | 1.51 | 0.01 |
| BSU27760 | <i>csbX</i>  | 1.59 | 0.00 | 1.24 | 0.14 |
| BSU27770 | <i>yrbE</i>  | 0.08 | 0.00 | 0.30 | 0.00 |
| BSU27785 | <i>yrzF</i>  | 1.33 | 0.16 | 3.08 | 0.02 |
| BSU27820 | <i>yrbC</i>  | 0.91 | 0.65 | 1.11 | 0.56 |
| BSU27840 | <i>safA</i>  | 0.93 | 0.68 | 1.04 | 0.66 |
| BSU27890 | <i>nadR</i>  | 1.03 | 0.67 | 0.97 | 0.63 |
| BSU27900 | <i>pheA</i>  | 1.28 | 0.07 | 1.86 | 0.00 |
| BSU27910 | <i>pheB</i>  | 0.96 | 0.71 | 1.11 | 0.55 |
| BSU27920 | <i>obgE</i>  | 0.52 | 0.01 | 0.74 | 0.02 |

|          |              |      |      |      |      |
|----------|--------------|------|------|------|------|
| BSU27930 | <i>spo0B</i> | 0.86 | 0.21 | 0.87 | 0.24 |
| BSU27940 | <i>rpmA</i>  | 1.65 | 0.02 | 2.03 | 0.00 |
| BSU27950 | <i>ysxB</i>  | 1.08 | 0.45 | 1.07 | 0.45 |
| BSU27960 | <i>rplU</i>  | 0.77 | 0.12 | 0.89 | 0.14 |
| BSU27990 | <i>minD</i>  | 0.72 | 0.00 | 0.94 | 0.58 |
| BSU28000 | <i>minC</i>  | 0.97 | 0.51 | 1.01 | 0.96 |
| BSU28010 | <i>mreD</i>  | 1.21 | 0.01 | 1.67 | 0.06 |
| BSU28020 | <i>mreC</i>  | 0.71 | 0.00 | 0.82 | 0.11 |
| BSU28030 | <i>mreB</i>  | 0.39 | 0.00 | 0.49 | 0.00 |
| BSU28040 | <i>radC</i>  | 1.31 | 0.10 | 1.11 | 0.14 |
| BSU28050 | <i>maf</i>   | 0.37 | 0.00 | 0.64 | 0.01 |
| BSU28080 | <i>folC</i>  | 0.69 | 0.00 | 0.89 | 0.04 |
| BSU28090 | <i>valS</i>  | 0.22 | 0.00 | 0.55 | 0.00 |
| BSU28120 | <i>hemL</i>  | 0.76 | 0.15 | 0.91 | 0.11 |
| BSU28130 | <i>hemB</i>  | 0.84 | 0.48 | 0.86 | 0.02 |
| BSU28140 | <i>hemD</i>  | 0.89 | 0.60 | 0.76 | 0.01 |
| BSU28150 | <i>hemC</i>  | 1.02 | 0.99 | 0.84 | 0.06 |
| BSU28160 | <i>hemX</i>  | 2.15 | 0.00 | 1.27 | 0.13 |
| BSU28170 | <i>hemA</i>  | 0.58 | 0.02 | 0.82 | 0.07 |
| BSU28190 | <i>engB</i>  | 1.43 | 0.01 | 1.63 | 0.00 |
| BSU28200 | <i>lonA</i>  | 0.42 | 0.00 | 0.45 | 0.00 |
| BSU28220 | <i>clpX</i>  | 0.62 | 0.00 | 0.96 | 0.79 |
| BSU28230 | <i>tig</i>   | 0.69 | 0.01 | 0.86 | 0.02 |
| BSU28280 | <i>leuA</i>  | 1.21 | 0.41 | 2.82 | 0.00 |
| BSU28290 | <i>ilvC</i>  | 0.98 | 0.72 | 0.68 | 0.07 |
| BSU28300 | <i>ilvH</i>  | 0.98 | 0.79 | 1.21 | 0.39 |
| BSU28310 | <i>ilvB</i>  | 1.11 | 0.35 | 1.19 | 0.42 |
| BSU28350 | <i>ysnB</i>  | 1.38 | 0.03 | 1.56 | 0.00 |
| BSU28360 | <i>ysnA</i>  | 0.66 | 0.05 | 1.01 | 0.94 |
| BSU28370 | <i>rph</i>   | 0.93 | 0.57 | 1.24 | 0.29 |
| BSU28390 | <i>racE</i>  | 0.70 | 0.00 | 1.05 | 0.63 |
| BSU28400 | <i>ysmB</i>  | 0.71 | 0.02 | 1.01 | 0.99 |
| BSU28410 | <i>gerE</i>  | 1.95 | 0.03 | 1.94 | 0.00 |
| BSU28420 | <i>ysmA</i>  | 0.61 | 0.00 | 0.62 | 0.11 |
| BSU28430 | <i>sdhB</i>  | 1.13 | 0.18 | 1.44 | 0.08 |
| BSU28440 | <i>sdhA</i>  | 0.56 | 0.00 | 0.74 | 0.09 |
| BSU28450 | <i>sdhC</i>  | 1.15 | 0.18 | 1.04 | 0.66 |
| BSU28460 | <i>yslB</i>  | 1.30 | 0.00 | 2.01 | 0.04 |
| BSU28490 | <i>uvrC</i>  | 0.39 | 0.00 | 0.56 | 0.00 |
| BSU28500 | <i>trxA</i>  | 0.79 | 0.00 | 0.94 | 0.59 |
| BSU28520 | <i>etfA</i>  | 1.16 | 0.14 | 1.50 | 0.04 |
| BSU28530 | <i>etfB</i>  | 1.01 | 0.99 | 0.99 | 0.85 |
| BSU28540 | <i>ysiB</i>  | 0.62 | 0.01 | 0.72 | 0.04 |
| BSU28550 | <i>fadR</i>  | 0.57 | 0.00 | 0.59 | 0.02 |
| BSU28560 | <i>lcfA</i>  | 1.28 | 0.00 | 1.35 | 0.01 |
| BSU28570 | <i>yshE</i>  | 1.15 | 0.16 | 1.57 | 0.20 |
| BSU28580 | <i>mutSB</i> | 0.64 | 0.02 | 0.78 | 0.01 |

|          |             |      |      |      |      |
|----------|-------------|------|------|------|------|
| BSU28590 | <i>yshC</i> | 0.52 | 0.00 | 0.51 | 0.01 |
| BSU28600 | <i>yshB</i> | 0.99 | 0.90 | 1.25 | 0.47 |
| BSU28610 | <i>yshA</i> | 0.55 | 0.01 | 0.85 | 0.30 |
| BSU28620 | <i>rnhC</i> | 1.15 | 0.18 | 1.78 | 0.00 |
| BSU28630 | <i>pheT</i> | 0.51 | 0.00 | 0.85 | 0.12 |
| BSU28640 | <i>pheS</i> | 0.37 | 0.00 | 0.42 | 0.00 |
| BSU28650 | <i>ysgA</i> | 0.36 | 0.00 | 0.23 | 0.00 |
| BSU28700 | <i>yseE</i> | 1.98 | 0.00 | 1.65 | 0.00 |
| BSU28710 | <i>cstA</i> | 0.37 | 0.00 | 0.55 | 0.01 |
| BSU28820 | <i>ysdC</i> | 0.68 | 0.05 | 0.81 | 0.21 |
| BSU28830 | <i>ysdB</i> | 1.26 | 0.01 | 1.55 | 0.21 |
| BSU28840 | <i>ysdA</i> | 1.80 | 0.01 | 1.69 | 0.03 |
| BSU28850 | <i>rplT</i> | 1.07 | 0.82 | 1.54 | 0.01 |
| BSU28860 | <i>rpml</i> | 0.76 | 0.01 | 0.79 | 0.03 |
| BSU28870 | <i>infC</i> | 0.80 | 0.11 | 0.98 | 0.71 |
| BSU28900 | <i>ysbB</i> | 0.90 | 0.63 | 0.98 | 0.98 |
| BSU28910 | <i>ysbA</i> | 0.58 | 0.08 | 0.54 | 0.10 |
| BSU28920 | <i>lytT</i> | 1.61 | 0.01 | 1.83 | 0.01 |
| BSU28940 | <i>ysaA</i> | 1.14 | 0.18 | 1.16 | 0.07 |
| BSU28950 | <i>thrS</i> | 0.42 | 0.00 | 0.66 | 0.05 |
| BSU28960 | <i>ytxC</i> | 1.04 | 0.62 | 1.03 | 0.63 |
| BSU28970 | <i>ytxB</i> | 1.05 | 0.46 | 1.11 | 0.27 |
| BSU28980 | <i>dnal</i> | 0.54 | 0.00 | 0.57 | 0.00 |
| BSU29000 | <i>nrpR</i> | 0.90 | 0.03 | 1.31 | 0.11 |
| BSU29010 | <i>speD</i> | 1.36 | 0.00 | 3.28 | 0.02 |
| BSU29060 | <i>coaE</i> | 1.25 | 0.06 | 1.38 | 0.00 |
| BSU29070 | <i>ytaF</i> | 0.80 | 0.01 | 0.83 | 0.08 |
| BSU29080 | <i>mutM</i> | 0.89 | 0.09 | 1.15 | 0.39 |
| BSU29090 | <i>polA</i> | 0.37 | 0.00 | 0.41 | 0.00 |
| BSU29100 | <i>phoR</i> | 0.42 | 0.00 | 0.58 | 0.00 |
| BSU29110 | <i>phoP</i> | 0.81 | 0.00 | 0.90 | 0.45 |
| BSU29120 | <i>mdh</i>  | 1.55 | 0.01 | 1.69 | 0.04 |
| BSU29130 | <i>icd</i>  | 0.70 | 0.01 | 0.68 | 0.04 |
| BSU29140 | <i>citZ</i> | 0.92 | 0.13 | 1.40 | 0.07 |
| BSU29150 | <i>ytwI</i> | 1.55 | 0.01 | 1.80 | 0.12 |
| BSU29160 | <i>ytvI</i> | 0.90 | 0.21 | 1.09 | 0.12 |
| BSU29170 | <i>fxsA</i> | 1.29 | 0.05 | 1.25 | 0.17 |
| BSU29180 | <i>pyk</i>  | 0.69 | 0.04 | 0.80 | 0.08 |
| BSU29190 | <i>pfkA</i> | 0.48 | 0.00 | 0.72 | 0.04 |
| BSU29200 | <i>accA</i> | 0.94 | 0.48 | 0.98 | 0.75 |
| BSU29210 | <i>accD</i> | 0.92 | 0.07 | 0.96 | 0.72 |
| BSU29220 | <i>ytsJ</i> | 0.68 | 0.02 | 0.87 | 0.22 |
| BSU29230 | <i>dnaE</i> | 0.15 | 0.00 | 0.10 | 0.00 |
| BSU29249 | <i>ytzJ</i> | 0.76 | 0.21 | 0.82 | 0.50 |
| BSU29250 | <i>nrnA</i> | 0.57 | 0.00 | 0.93 | 0.20 |
| BSU29260 | <i>ytpl</i> | 0.89 | 0.05 | 0.71 | 0.08 |
| BSU29270 | <i>ytol</i> | 0.23 | 0.00 | 0.23 | 0.00 |

|          |             |      |      |      |      |
|----------|-------------|------|------|------|------|
| BSU29410 | <i>ytkL</i> | 0.83 | 0.20 | 0.88 | 0.21 |
| BSU29420 | <i>fabG</i> | 0.48 | 0.01 | 0.60 | 0.00 |
| BSU29460 | <i>moaB</i> | 0.83 | 0.24 | 1.26 | 0.24 |
| BSU29470 | <i>ackA</i> | 0.95 | 0.42 | 1.03 | 0.92 |
| BSU29480 | <i>ytxK</i> | 0.98 | 0.77 | 1.07 | 0.72 |
| BSU29490 | <i>tpx</i>  | 0.92 | 0.41 | 0.85 | 0.08 |
| BSU29520 | <i>yteJ</i> | 1.64 | 0.00 | 1.74 | 0.01 |
| BSU29530 | <i>sppA</i> | 0.74 | 0.00 | 0.93 | 0.27 |
| BSU29540 | <i>ppnK</i> | 0.85 | 0.23 | 0.94 | 0.31 |
| BSU29550 | <i>ytcJ</i> | 0.74 | 0.01 | 1.22 | 0.35 |
| BSU29560 | <i>ytcl</i> | 0.56 | 0.00 | 0.75 | 0.01 |
| BSU29570 | <i>sspA</i> | 1.17 | 0.22 | 1.01 | 0.97 |
| BSU29580 | <i>ytbJ</i> | 0.48 | 0.00 | 0.62 | 0.01 |
| BSU29590 | <i>iscS</i> | 0.73 | 0.01 | 0.66 | 0.00 |
| BSU29600 | <i>braB</i> | 0.64 | 0.00 | 0.83 | 0.12 |
| BSU29610 | <i>ezrA</i> | 0.41 | 0.00 | 0.52 | 0.00 |
| BSU29620 | <i>hisJ</i> | 0.80 | 0.07 | 1.70 | 0.01 |
| BSU29630 | <i>yttP</i> | 1.62 | 0.01 | 3.92 | 0.00 |
| BSU29640 | <i>ytsP</i> | 1.22 | 0.43 | 1.21 | 0.31 |
| BSU29650 | <i>ytrP</i> | 0.47 | 0.00 | 0.37 | 0.00 |
| BSU29660 | <i>rpsD</i> | 1.02 | 0.85 | 1.59 | 0.02 |
| BSU29670 | <i>tyrS</i> | 0.54 | 0.00 | 0.61 | 0.00 |
| BSU29679 | <i>ytzK</i> | 0.55 | 0.03 | 0.08 | 0.01 |
| BSU29680 | <i>acsA</i> | 0.58 | 0.00 | 0.79 | 0.28 |
| BSU29720 | <i>ytxE</i> | 1.08 | 0.62 | 1.56 | 0.03 |
| BSU29740 | <i>ccpA</i> | 0.40 | 0.00 | 0.49 | 0.00 |
| BSU29750 | <i>aroA</i> | 0.42 | 0.01 | 0.40 | 0.00 |
| BSU29760 | <i>ytxJ</i> | 2.16 | 0.00 | 2.53 | 0.01 |
| BSU29770 | <i>ytxH</i> | 0.80 | 0.05 | 0.78 | 0.11 |
| BSU29780 | <i>ytxG</i> | 0.74 | 0.01 | 0.86 | 0.46 |
| BSU29790 | <i>murC</i> | 0.55 | 0.00 | 0.73 | 0.01 |
| BSU29805 | <i>ytpS</i> | 0.29 | 0.00 | 0.39 | 0.00 |
| BSU29820 | <i>ytpR</i> | 0.85 | 0.10 | 0.89 | 0.24 |
| BSU29830 | <i>ytpQ</i> | 0.52 | 0.00 | 0.68 | 0.01 |
| BSU29840 | <i>ytpP</i> | 0.97 | 0.78 | 1.08 | 0.25 |
| BSU29850 | <i>ytoQ</i> | 1.02 | 0.85 | 1.61 | 0.01 |
| BSU29860 | <i>ytoP</i> | 0.40 | 0.00 | 0.72 | 0.02 |
| BSU29870 | <i>ytzB</i> | 0.75 | 0.21 | 0.84 | 0.41 |
| BSU29880 | <i>mals</i> | 0.95 | 0.58 | 1.03 | 0.97 |
| BSU29890 | <i>ytnP</i> | 1.09 | 0.39 | 1.26 | 0.18 |
| BSU29900 | <i>trmB</i> | 0.98 | 0.69 | 1.64 | 0.02 |
| BSU29910 | <i>ytzH</i> | 0.83 | 0.19 | 0.65 | 0.03 |
| BSU29920 | <i>ytmP</i> | 0.95 | 0.60 | 0.66 | 0.03 |
| BSU29940 | <i>ytIR</i> | 1.14 | 0.25 | 1.01 | 1.00 |
| BSU29950 | <i>ytIQ</i> | 0.73 | 0.02 | 0.77 | 0.09 |
| BSU29960 | <i>ytIP</i> | 0.65 | 0.00 | 0.98 | 0.74 |
| BSU29970 | <i>ytkP</i> | 0.83 | 0.04 | 1.18 | 0.06 |

|          |              |      |      |      |      |
|----------|--------------|------|------|------|------|
| BSU29980 | <i>ytjP</i>  | 0.78 | 0.13 | 0.97 | 0.64 |
| BSU29990 | <i>pbuO</i>  | 1.67 | 0.01 | 2.30 | 0.00 |
| BSU30000 | <i>ythQ</i>  | 1.39 | 0.00 | 1.62 | 0.01 |
| BSU30010 | <i>ythP</i>  | 1.21 | 0.08 | 1.13 | 0.33 |
| BSU30020 | <i>ytzE</i>  | 1.39 | 0.00 | 2.46 | 0.05 |
| BSU30035 | <i>ytzG</i>  | 0.91 | 0.15 | 0.95 | 0.57 |
| BSU30050 | <i>ytgP</i>  | 0.43 | 0.00 | 0.63 | 0.00 |
| BSU30060 | <i>ytfP</i>  | 0.45 | 0.00 | 0.82 | 0.04 |
| BSU30070 | <i>opuD</i>  | 0.48 | 0.00 | 0.98 | 0.70 |
| BSU30310 | <i>ytwF</i>  | 1.59 | 0.05 | 1.13 | 0.73 |
| BSU30320 | <i>leuS</i>  | 0.45 | 0.00 | 0.86 | 0.27 |
| BSU30410 | <i>ytrF</i>  | 0.78 | 0.14 | 1.15 | 0.45 |
| BSU30420 | <i>ytrE</i>  | 0.70 | 0.03 | 0.61 | 0.00 |
| BSU30430 | <i>ytrD</i>  | 0.78 | 0.11 | 1.04 | 0.91 |
| BSU30440 | <i>ytrC</i>  | 0.80 | 0.25 | 1.03 | 0.91 |
| BSU30450 | <i>ytrB</i>  | 0.59 | 0.00 | 0.53 | 0.01 |
| BSU30470 | <i>ytzC</i>  | 1.32 | 0.06 | 1.32 | 0.22 |
| BSU30480 | <i>ytqA</i>  | 0.41 | 0.00 | 0.64 | 0.02 |
| BSU30490 | <i>ytqB</i>  | 1.18 | 0.18 | 1.21 | 0.22 |
| BSU30500 | <i>ytpB</i>  | 1.10 | 0.38 | 2.24 | 0.00 |
| BSU30510 | <i>ytpA</i>  | 0.79 | 0.02 | 1.00 | 0.97 |
| BSU30520 | <i>ytoA</i>  | 1.21 | 0.05 | 1.97 | 0.01 |
| BSU30530 | <i>ytnA</i>  | 0.54 | 0.00 | 0.63 | 0.01 |
| BSU30540 | <i>asnB</i>  | 0.35 | 0.00 | 0.91 | 0.30 |
| BSU30550 | <i>metK</i>  | 0.71 | 0.04 | 0.94 | 0.47 |
| BSU30560 | <i>pckA</i>  | 0.35 | 0.02 | 0.32 | 0.02 |
| BSU30570 | <i>ytmB</i>  | 0.96 | 0.82 | 1.21 | 0.36 |
| BSU30630 | <i>ytkD</i>  | 0.99 | 0.70 | 2.87 | 0.02 |
| BSU30650 | <i>dps</i>   | 1.19 | 0.07 | 1.21 | 0.04 |
| BSU30659 | <i>ytzI</i>  | 0.76 | 0.01 | 0.73 | 0.05 |
| BSU30660 | <i>ytkA</i>  | 0.57 | 0.00 | 0.60 | 0.00 |
| BSU30670 | <i>luxS</i>  | 1.31 | 0.03 | 1.74 | 0.00 |
| BSU30680 | <i>ytjA</i>  | 0.95 | 0.52 | 0.85 | 0.32 |
| BSU30690 | <i>ytiB</i>  | 0.52 | 0.01 | 0.51 | 0.00 |
| BSU30700 | <i>rpmE2</i> | 1.36 | 0.26 | 1.29 | 0.27 |
| BSU30740 | <i>mntD</i>  | 1.54 | 0.18 | 1.72 | 0.01 |
| BSU30750 | <i>mntC</i>  | 0.66 | 0.21 | 0.81 | 0.14 |
| BSU30760 | <i>mntB</i>  | 0.91 | 0.70 | 0.90 | 0.48 |
| BSU30770 | <i>mntA</i>  | 0.99 | 0.90 | 3.37 | 0.00 |
| BSU30780 | <i>menC</i>  | 0.76 | 0.08 | 0.86 | 0.07 |
| BSU30790 | <i>menE</i>  | 0.79 | 0.24 | 0.91 | 0.08 |
| BSU30800 | <i>menB</i>  | 0.87 | 0.15 | 1.18 | 0.27 |
| BSU30810 | <i>ytxM</i>  | 0.56 | 0.02 | 0.50 | 0.00 |
| BSU30820 | <i>menD</i>  | 0.64 | 0.06 | 0.94 | 0.52 |
| BSU30830 | <i>menF</i>  | 0.95 | 0.62 | 0.97 | 0.68 |
| BSU30930 | <i>ytaB</i>  | 1.00 | 0.94 | 1.54 | 0.01 |
| BSU30990 | <i>thiT</i>  | 1.19 | 0.08 | 1.67 | 0.03 |

|          |             |      |      |      |      |
|----------|-------------|------|------|------|------|
| BSU31000 | <i>yuaI</i> | 1.69 | 0.00 | 1.95 | 0.00 |
| BSU31010 | <i>yuaG</i> | 1.31 | 0.06 | 1.16 | 0.23 |
| BSU31020 | <i>yuaF</i> | 1.13 | 0.27 | 0.99 | 0.95 |
| BSU31030 | <i>yuaE</i> | 1.06 | 0.65 | 0.92 | 0.54 |
| BSU31040 | <i>yuaD</i> | 0.83 | 0.07 | 0.64 | 0.01 |
| BSU31080 | <i>yuaB</i> | 1.45 | 0.02 | 1.71 | 0.01 |
| BSU31110 | <i>yubF</i> | 1.29 | 0.22 | 1.29 | 0.17 |
| BSU31150 | <i>yubB</i> | 0.83 | 0.08 | 1.04 | 0.92 |
| BSU31160 | <i>yubA</i> | 0.45 | 0.00 | 0.48 | 0.01 |
| BSU31170 | <i>yulF</i> | 0.64 | 0.00 | 1.12 | 0.08 |
| BSU31210 | <i>yulB</i> | 0.71 | 0.10 | 0.82 | 0.05 |
| BSU31240 | <i>mcpA</i> | 0.45 | 0.02 | 0.52 | 0.01 |
| BSU31260 | <i>mcpB</i> | 0.39 | 0.01 | 0.56 | 0.01 |
| BSU31279 | <i>yuzH</i> | 3.53 | 0.00 | 2.27 | 0.01 |
| BSU31280 | <i>yugU</i> | 0.84 | 0.19 | 0.63 | 0.01 |
| BSU31310 | <i>yugP</i> | 0.29 | 0.00 | 0.37 | 0.00 |
| BSU31330 | <i>yugN</i> | 1.25 | 0.22 | 1.24 | 0.24 |
| BSU31340 | <i>yugM</i> | 1.14 | 0.37 | 2.09 | 0.01 |
| BSU31350 | <i>pgi</i>  | 0.50 | 0.00 | 0.64 | 0.01 |
| BSU31360 | <i>yugK</i> | 1.01 | 0.90 | 1.05 | 0.32 |
| BSU31370 | <i>yugJ</i> | 1.09 | 0.08 | 2.07 | 0.01 |
| BSU31380 | <i>yuzA</i> | 1.00 | 1.00 | 1.24 | 0.03 |
| BSU31390 | <i>yugI</i> | 0.87 | 0.39 | 0.90 | 0.57 |
| BSU31400 | <i>alaT</i> | 0.75 | 0.00 | 0.99 | 0.91 |
| BSU31410 | <i>yugG</i> | 0.75 | 0.10 | 0.53 | 0.00 |
| BSU31430 | <i>yugE</i> | 1.19 | 0.04 | 1.20 | 0.18 |
| BSU31440 | <i>patB</i> | 1.06 | 0.61 | 1.30 | 0.07 |
| BSU31460 | <i>kapB</i> | 1.27 | 0.01 | 1.11 | 0.45 |
| BSU31490 | <i>pbpD</i> | 0.39 | 0.00 | 0.50 | 0.00 |
| BSU31500 | <i>yuxK</i> | 1.68 | 0.00 | 1.93 | 0.00 |
| BSU31510 | <i>yufK</i> | 0.70 | 0.06 | 0.92 | 0.70 |
| BSU31530 | <i>yufM</i> | 0.94 | 0.42 | 1.06 | 0.96 |
| BSU31580 | <i>maeN</i> | 0.75 | 0.14 | 0.90 | 0.35 |
| BSU31600 | <i>mrpA</i> | 0.71 | 0.05 | 0.80 | 0.03 |
| BSU31610 | <i>mrpB</i> | 1.01 | 0.91 | 0.91 | 0.11 |
| BSU31620 | <i>mrpC</i> | 1.00 | 0.92 | 0.94 | 0.55 |
| BSU31630 | <i>mrpD</i> | 0.90 | 0.54 | 0.91 | 0.04 |
| BSU31640 | <i>mrpE</i> | 0.92 | 0.27 | 0.86 | 0.44 |
| BSU31650 | <i>mrpF</i> | 1.00 | 0.92 | 0.98 | 0.93 |
| BSU31660 | <i>mrpG</i> | 1.60 | 0.00 | 1.97 | 0.01 |
| BSU31670 | <i>yuxO</i> | 1.96 | 0.00 | 2.25 | 0.00 |
| BSU31680 | <i>comA</i> | 0.78 | 0.03 | 1.29 | 0.07 |
| BSU31690 | <i>comP</i> | 0.69 | 0.23 | 0.44 | 0.07 |
| BSU31700 | <i>comX</i> | 0.86 | 0.72 | 0.88 | 0.90 |
| BSU31710 | <i>comQ</i> | 1.20 | 0.92 | 6.98 | 0.02 |
| BSU31730 | <i>yuzC</i> | 0.94 | 0.69 | 1.08 | 0.32 |
| BSU31740 | <i>yuxH</i> | 0.68 | 0.02 | 1.77 | 0.01 |

|          |              |      |      |      |      |
|----------|--------------|------|------|------|------|
| BSU31750 | <i>yueK</i>  | 0.71 | 0.00 | 0.96 | 0.66 |
| BSU31760 | <i>pncA</i>  | 0.83 | 0.02 | 0.84 | 0.11 |
| BSU31770 | <i>yuel</i>  | 1.40 | 0.00 | 1.26 | 0.02 |
| BSU31780 | <i>yueH</i>  | 0.52 | 0.00 | 0.64 | 0.00 |
| BSU31790 | <i>yueG</i>  | 1.87 | 0.02 | 1.96 | 0.03 |
| BSU31800 | <i>yueF</i>  | 0.58 | 0.03 | 0.45 | 0.01 |
| BSU31820 | <i>yuzF</i>  | 1.12 | 0.43 | 0.93 | 0.41 |
| BSU31830 | <i>yueE</i>  | 0.87 | 0.10 | 0.98 | 0.79 |
| BSU31840 | <i>yueD</i>  | 0.86 | 0.05 | 1.06 | 0.76 |
| BSU31850 | <i>yueC</i>  | 0.81 | 0.13 | 0.73 | 0.04 |
| BSU31860 | <i>yueB</i>  | 0.74 | 0.04 | 0.51 | 0.01 |
| BSU31875 | <i>yukB</i>  | 0.69 | 0.01 | 0.77 | 0.08 |
| BSU31890 | <i>yukC</i>  | 0.98 | 0.87 | 1.36 | 0.03 |
| BSU31900 | <i>yukD</i>  | 0.87 | 0.23 | 0.69 | 0.05 |
| BSU31910 | <i>yukE</i>  | 1.28 | 0.17 | 1.86 | 0.03 |
| BSU31930 | <i>ald</i>   | 0.73 | 0.01 | 0.64 | 0.03 |
| BSU31945 | <i>yukJ</i>  | 0.92 | 0.11 | 4.21 | 0.00 |
| BSU31959 | <i>ybdZ</i>  | 1.87 | 0.04 | 2.11 | 0.01 |
| BSU31960 | <i>dhbF</i>  | 1.10 | 0.74 | 1.55 | 0.02 |
| BSU31970 | <i>dhbB</i>  | 0.89 | 0.35 | 0.88 | 0.09 |
| BSU31980 | <i>dhbE</i>  | 1.00 | 0.99 | 1.01 | 0.90 |
| BSU31990 | <i>dhbC</i>  | 0.86 | 0.39 | 0.80 | 0.25 |
| BSU32000 | <i>dhbA</i>  | 0.69 | 0.08 | 0.76 | 0.11 |
| BSU32010 | <i>besA</i>  | 1.03 | 0.88 | 1.51 | 0.01 |
| BSU32030 | <i>bioYB</i> | 1.04 | 0.57 | 1.95 | 0.01 |
| BSU32050 | <i>yuiE</i>  | 0.78 | 0.12 | 0.73 | 0.05 |
| BSU32060 | <i>yuiD</i>  | 0.90 | 0.39 | 1.61 | 0.00 |
| BSU32080 | <i>yuiB</i>  | 1.19 | 0.31 | 0.99 | 0.97 |
| BSU32110 | <i>yumC</i>  | 0.45 | 0.00 | 0.55 | 0.00 |
| BSU32130 | <i>guaC</i>  | 0.97 | 0.70 | 0.74 | 0.02 |
| BSU32160 | <i>yutM</i>  | 0.79 | 0.06 | 0.67 | 0.04 |
| BSU32170 | <i>dapF</i>  | 0.26 | 0.00 | 0.22 | 0.00 |
| BSU32180 | <i>yutK</i>  | 0.97 | 0.72 | 1.62 | 0.02 |
| BSU32190 | <i>yuzB</i>  | 1.05 | 0.79 | 1.33 | 0.27 |
| BSU32200 | <i>yutJ</i>  | 0.56 | 0.01 | 1.02 | 0.90 |
| BSU32220 | <i>yutI</i>  | 0.45 | 0.03 | 0.40 | 0.03 |
| BSU32230 | <i>yuxL</i>  | 1.04 | 0.81 | 0.94 | 0.66 |
| BSU32240 | <i>thrB</i>  | 1.12 | 0.76 | 1.14 | 0.43 |
| BSU32250 | <i>thrC</i>  | 0.83 | 0.32 | 0.90 | 0.46 |
| BSU32260 | <i>hom</i>   | 0.54 | 0.01 | 0.67 | 0.06 |
| BSU32290 | <i>yutF</i>  | 1.01 | 0.78 | 0.95 | 0.62 |
| BSU32300 | <i>yutE</i>  | 0.77 | 0.01 | 0.73 | 0.02 |
| BSU32310 | <i>yutD</i>  | 0.63 | 0.00 | 0.93 | 0.70 |
| BSU32330 | <i>lipA</i>  | 0.39 | 0.01 | 0.54 | 0.00 |
| BSU32350 | <i>yunB</i>  | 1.01 | 0.87 | 1.32 | 0.04 |
| BSU32360 | <i>yunC</i>  | 1.39 | 0.08 | 1.35 | 0.09 |
| BSU32370 | <i>yunD</i>  | 0.73 | 0.02 | 0.85 | 0.27 |

|          |             |      |      |      |      |
|----------|-------------|------|------|------|------|
| BSU32380 | <i>yunE</i> | 0.63 | 0.01 | 0.64 | 0.01 |
| BSU32390 | <i>yunF</i> | 0.77 | 0.01 | 1.09 | 0.13 |
| BSU32400 | <i>yunG</i> | 0.77 | 0.09 | 0.67 | 0.01 |
| BSU32560 | <i>frlR</i> | 0.63 | 0.00 | 0.66 | 0.00 |
| BSU32620 | <i>yurQ</i> | 1.18 | 0.00 | 1.50 | 0.01 |
| BSU32630 | <i>yurR</i> | 0.62 | 0.03 | 0.75 | 0.19 |
| BSU32640 | <i>sspG</i> | 0.51 | 0.02 | 0.70 | 0.09 |
| BSU32650 | <i>yurS</i> | 1.53 | 0.02 | 2.02 | 0.02 |
| BSU32660 | <i>yurT</i> | 0.97 | 0.74 | 1.02 | 0.87 |
| BSU32669 | <i>yuzN</i> | 0.54 | 0.03 | 0.74 | 0.14 |
| BSU32670 | <i>sufB</i> | 0.77 | 0.07 | 0.83 | 0.10 |
| BSU32680 | <i>iscU</i> | 1.02 | 0.84 | 1.06 | 0.15 |
| BSU32690 | <i>sufS</i> | 0.92 | 0.65 | 0.95 | 0.49 |
| BSU32700 | <i>sufD</i> | 0.67 | 0.09 | 0.69 | 0.04 |
| BSU32710 | <i>sufC</i> | 0.63 | 0.02 | 0.69 | 0.01 |
| BSU32719 | <i>yuzK</i> | 1.86 | 0.11 | 1.79 | 0.17 |
| BSU32730 | <i>metN</i> | 0.83 | 0.13 | 1.41 | 0.17 |
| BSU32740 | <i>metP</i> | 0.66 | 0.00 | 0.66 | 0.03 |
| BSU32750 | <i>metQ</i> | 0.69 | 0.00 | 0.88 | 0.41 |
| BSU32770 | <i>yusE</i> | 1.05 | 0.80 | 2.81 | 0.00 |
| BSU32780 | <i>yusF</i> | 2.28 | 0.01 | 1.04 | 0.54 |
| BSU32790 | <i>yusG</i> | 2.08 | 0.00 | 1.71 | 0.01 |
| BSU32800 | <i>yusH</i> | 0.84 | 0.10 | 0.91 | 0.10 |
| BSU32810 | <i>yusI</i> | 0.49 | 0.01 | 0.63 | 0.07 |
| BSU32870 | <i>yusO</i> | 0.66 | 0.00 | 0.58 | 0.00 |
| BSU32880 | <i>yusP</i> | 0.72 | 0.03 | 0.81 | 0.06 |
| BSU32930 | <i>yusU</i> | 1.32 | 0.11 | 1.17 | 0.11 |
| BSU32940 | <i>yusV</i> | 0.27 | 0.00 | 0.37 | 0.01 |
| BSU32990 | <i>mrgA</i> | 0.94 | 0.86 | 0.83 | 0.25 |
| BSU33000 | <i>htrB</i> | 0.46 | 0.00 | 0.48 | 0.01 |
| BSU33010 | <i>cssR</i> | 0.71 | 0.03 | 0.88 | 0.27 |
| BSU33020 | <i>cssS</i> | 0.80 | 0.06 | 0.34 | 0.01 |
| BSU33029 | <i>yuzO</i> | 1.11 | 0.63 | 0.94 | 0.64 |
| BSU33030 | <i>yuxN</i> | 0.78 | 0.07 | 0.55 | 0.04 |
| BSU33040 | <i>fumC</i> | 0.55 | 0.00 | 0.80 | 0.04 |
| BSU33049 | <i>yvzF</i> | 0.64 | 0.14 | 0.77 | 0.32 |
| BSU33080 | <i>liaR</i> | 1.59 | 0.04 | 0.92 | 0.12 |
| BSU33090 | <i>liaS</i> | 0.87 | 0.17 | 0.86 | 0.44 |
| BSU33100 | <i>liaF</i> | 0.82 | 0.02 | 0.96 | 0.59 |
| BSU33110 | <i>liaG</i> | 0.99 | 0.90 | 0.79 | 0.14 |
| BSU33120 | <i>liaH</i> | 1.26 | 0.27 | 1.06 | 0.59 |
| BSU33130 | <i>liaI</i> | 0.51 | 0.02 | 0.55 | 0.01 |
| BSU33150 | <i>yvqK</i> | 1.10 | 0.61 | 1.43 | 0.00 |
| BSU33160 | <i>yvrA</i> | 0.94 | 0.72 | 0.82 | 0.10 |
| BSU33170 | <i>yvrB</i> | 2.48 | 0.00 | 1.81 | 0.02 |
| BSU33180 | <i>yvrC</i> | 0.61 | 0.00 | 0.83 | 0.06 |
| BSU33190 | <i>yvrD</i> | 0.88 | 0.10 | 0.90 | 0.42 |



|          |              |       |      |       |      |
|----------|--------------|-------|------|-------|------|
| BSU33200 | <i>yvrE</i>  | 1.10  | 0.47 | 0.99  | 0.87 |
| BSU33210 | <i>yvrG</i>  | 0.57  | 0.01 | 0.75  | 0.03 |
| BSU33240 | <i>oxdC</i>  | 1.03  | 0.77 | 0.69  | 0.02 |
| BSU33260 | <i>yvrN</i>  | 0.85  | 0.30 | 0.93  | 0.64 |
| BSU33270 | <i>yvrO</i>  | 0.64  | 0.02 | 0.78  | 0.08 |
| BSU33290 | <i>fhuC</i>  | 0.86  | 0.02 | 1.14  | 0.01 |
| BSU33300 | <i>fhuG</i>  | 0.58  | 0.00 | 0.65  | 0.03 |
| BSU33310 | <i>fhuB</i>  | 0.51  | 0.00 | 0.47  | 0.07 |
| BSU33320 | <i>fhuD</i>  | 0.43  | 0.00 | 0.71  | 0.01 |
| BSU33350 | <i>yvsG</i>  | 0.57  | 0.05 | 1.30  | 0.09 |
| BSU33370 | <i>yvgK</i>  | 0.93  | 0.19 | 1.00  | 0.95 |
| BSU33380 | <i>yvgL</i>  | 0.67  | 0.00 | 0.61  | 0.00 |
| BSU33390 | <i>yvgM</i>  | 1.28  | 0.16 | 1.36  | 0.01 |
| BSU33400 | <i>yvgN</i>  | 1.02  | 0.77 | 1.16  | 0.25 |
| BSU33420 | <i>nhaK</i>  | 0.48  | 0.00 | 0.75  | 0.12 |
| BSU33430 | <i>yvgQ</i>  | 0.60  | 0.02 | 0.82  | 0.30 |
| BSU33460 | <i>yvgT</i>  | 0.54  | 0.00 | 0.73  | 0.27 |
| BSU33470 | <i>bdbC</i>  | 1.39  | 0.01 | 1.57  | 0.01 |
| BSU33480 | <i>bdbD</i>  | 0.75  | 0.01 | 1.64  | 0.06 |
| BSU33490 | <i>copB</i>  | 0.39  | 0.05 | 0.52  | 0.01 |
| BSU33500 | <i>copA</i>  | 0.58  | 0.01 | 0.68  | 0.08 |
| BSU33510 | <i>copZ</i>  | 1.33  | 0.09 | 1.23  | 0.13 |
| BSU33520 | <i>csor</i>  | 0.52  | 0.04 | 0.73  | 0.03 |
| BSU33530 | <i>yvaA</i>  | 0.63  | 0.00 | 0.93  | 0.53 |
| BSU33540 | <i>yvaB</i>  | 0.94  | 0.60 | 0.88  | 0.06 |
| BSU33590 | <i>yvaG</i>  | 1.08  | 0.76 | 1.11  | 0.71 |
| BSU33600 | <i>smpB</i>  | 0.93  | 0.20 | 0.90  | 0.08 |
| BSU33610 | <i>rnr</i>   | 0.74  | 0.05 | 0.74  | 0.15 |
| BSU33620 | <i>yvaK</i>  | 0.44  | 0.00 | 0.52  | 0.00 |
| BSU33630 | <i>secG</i>  | 0.99  | 0.99 | 0.98  | 0.97 |
| BSU33660 | <i>rghRA</i> | 0.53  | 0.00 | 0.52  | 0.00 |
| BSU33670 | <i>rghRB</i> | 2.79  | 0.00 | 1.82  | 0.01 |
| BSU33680 | <i>yvaP</i>  | 1.08  | 0.30 | 1.41  | 0.03 |
| BSU33700 | <i>opuBD</i> | 23.71 | 0.00 | 24.30 | 0.00 |
| BSU33710 | <i>opuBC</i> | 0.25  | 0.00 | 0.36  | 0.01 |
| BSU33740 | <i>yvaV</i>  | 1.05  | 0.40 | 1.39  | 0.05 |
| BSU33780 | <i>sdpl</i>  | 0.64  | 0.30 | 0.60  | 0.55 |
| BSU33790 | <i>sdpR</i>  | 0.74  | 0.31 | 0.83  | 0.69 |
| BSU33800 | <i>opuCD</i> | 1.32  | 0.17 | 1.34  | 0.07 |
| BSU33810 | <i>opuCC</i> | 0.97  | 0.82 | 0.96  | 0.78 |
| BSU33820 | <i>opuCB</i> | 1.05  | 0.73 | 0.83  | 0.38 |
| BSU33860 | <i>yvbH</i>  | 0.84  | 0.07 | 0.92  | 0.65 |
| BSU33870 | <i>yvbl</i>  | 1.00  | 0.86 | 1.36  | 0.16 |
| BSU33880 | <i>yvbl</i>  | 0.57  | 0.00 | 0.79  | 0.03 |
| BSU33900 | <i>eno</i>   | 0.95  | 0.79 | 1.15  | 0.25 |
| BSU33910 | <i>pgm</i>   | 1.10  | 0.72 | 1.06  | 0.72 |
| BSU33920 | <i>tpiA</i>  | 0.95  | 0.81 | 0.80  | 0.04 |

|          |              |      |      |      |      |
|----------|--------------|------|------|------|------|
| BSU33930 | <i>pgk</i>   | 1.14 | 0.60 | 1.19 | 0.33 |
| BSU33940 | <i>gapA</i>  | 1.03 | 0.95 | 1.10 | 0.17 |
| BSU33950 | <i>cggR</i>  | 2.19 | 0.01 | 3.65 | 0.00 |
| BSU33970 | <i>araR</i>  | 0.88 | 0.16 | 1.01 | 0.72 |
| BSU34020 | <i>yvbX</i>  | 0.59 | 0.00 | 0.99 | 0.87 |
| BSU34030 | <i>yvbY</i>  | 1.07 | 0.49 | 1.14 | 0.37 |
| BSU34040 | <i>yvfW</i>  | 0.65 | 0.03 | 0.72 | 0.06 |
| BSU34050 | <i>yvfV</i>  | 0.48 | 0.00 | 0.33 | 0.01 |
| BSU34110 | <i>rsbP</i>  | 1.03 | 0.51 | 1.00 | 0.84 |
| BSU34180 | <i>yvfl</i>  | 1.54 | 0.05 | 0.86 | 0.26 |
| BSU34190 | <i>yvfH</i>  | 0.92 | 0.41 | 1.10 | 0.78 |
| BSU34200 | <i>sigL</i>  | 1.79 | 0.00 | 3.32 | 0.00 |
| BSU34210 | <i>yvfG</i>  | 1.49 | 0.00 | 2.03 | 0.07 |
| BSU34430 | <i>racX</i>  | 1.07 | 0.28 | 1.20 | 0.31 |
| BSU34440 | <i>pbpE</i>  | 0.71 | 0.02 | 0.69 | 0.09 |
| BSU34480 | <i>yvdT</i>  | 1.34 | 0.03 | 1.01 | 0.88 |
| BSU34540 | <i>clpP</i>  | 1.17 | 0.42 | 1.03 | 0.84 |
| BSU34640 | <i>yvdD</i>  | 0.85 | 0.12 | 1.11 | 0.52 |
| BSU34650 | <i>yvdC</i>  | 1.00 | 0.96 | 0.88 | 0.40 |
| BSU34680 | <i>yvcT</i>  | 0.93 | 0.37 | 1.21 | 0.02 |
| BSU34690 | <i>yvcS</i>  | 0.89 | 0.16 | 0.88 | 0.17 |
| BSU34700 | <i>yvcR</i>  | 0.92 | 0.10 | 1.12 | 0.52 |
| BSU34710 | <i>yvcQ</i>  | 0.62 | 0.00 | 0.83 | 0.05 |
| BSU34730 | <i>yvcN</i>  | 0.98 | 0.90 | 1.44 | 0.01 |
| BSU34740 | <i>crh</i>   | 0.86 | 0.12 | 0.96 | 0.43 |
| BSU34750 | <i>whiA</i>  | 0.95 | 0.58 | 0.79 | 0.15 |
| BSU34760 | <i>yvcK</i>  | 0.94 | 0.47 | 0.86 | 0.16 |
| BSU34770 | <i>yvcJ</i>  | 0.62 | 0.02 | 0.68 | 0.00 |
| BSU34780 | <i>yvcI</i>  | 0.67 | 0.01 | 0.76 | 0.02 |
| BSU34790 | <i>trxB</i>  | 0.35 | 0.00 | 0.45 | 0.00 |
| BSU34800 | <i>cwlO</i>  | 0.21 | 0.00 | 0.22 | 0.00 |
| BSU34810 | <i>yvcD</i>  | 0.66 | 0.01 | 0.69 | 0.00 |
| BSU34820 | <i>bmrA</i>  | 0.29 | 0.00 | 0.32 | 0.00 |
| BSU34960 | <i>yvoF</i>  | 1.43 | 0.06 | 1.56 | 0.00 |
| BSU34970 | <i>hprP</i>  | 0.93 | 0.50 | 0.89 | 0.23 |
| BSU34980 | <i>yvoD</i>  | 0.79 | 0.14 | 0.75 | 0.05 |
| BSU34990 | <i>lgt</i>   | 0.68 | 0.01 | 0.71 | 0.00 |
| BSU35000 | <i>hprK</i>  | 0.56 | 0.00 | 0.55 | 0.02 |
| BSU35010 | <i>nagA</i>  | 0.60 | 0.06 | 0.45 | 0.01 |
| BSU35020 | <i>nagBA</i> | 1.08 | 0.55 | 1.36 | 0.15 |
| BSU35030 | <i>yvoA</i>  | 1.42 | 0.12 | 1.11 | 0.39 |
| BSU35060 | <i>cypX</i>  | 0.27 | 0.01 | 0.67 | 0.01 |
| BSU35080 | <i>yvmB</i>  | 0.44 | 0.00 | 0.47 | 0.01 |
| BSU35090 | <i>yvmA</i>  | 0.75 | 0.02 | 1.07 | 0.22 |
| BSU35100 | <i>yvID</i>  | 2.03 | 0.00 | 2.13 | 0.00 |
| BSU35110 | <i>yvIC</i>  | 1.02 | 0.83 | 0.94 | 0.54 |
| BSU35120 | <i>yvIB</i>  | 0.92 | 0.35 | 0.73 | 0.01 |

|          |             |      |      |      |      |
|----------|-------------|------|------|------|------|
| BSU35130 | <i>yvIA</i> | 0.62 | 0.01 | 0.64 | 0.00 |
| BSU35160 | <i>uvrA</i> | 0.72 | 0.10 | 1.08 | 0.68 |
| BSU35170 | <i>uvrB</i> | 0.74 | 0.02 | 0.55 | 0.01 |
| BSU35180 | <i>csbA</i> | 1.01 | 1.00 | 1.29 | 0.40 |
| BSU35220 | <i>minI</i> | 0.57 | 0.01 | 0.44 | 0.00 |
| BSU35250 | <i>ftsX</i> | 0.70 | 0.05 | 1.09 | 0.01 |
| BSU35260 | <i>ftsE</i> | 0.28 | 0.00 | 0.23 | 0.00 |
| BSU35270 | <i>cccB</i> | 2.00 | 0.00 | 2.85 | 0.00 |
| BSU35280 | <i>yvjA</i> | 0.57 | 0.00 | 0.73 | 0.02 |
| BSU35290 | <i>prfB</i> | 0.70 | 0.05 | 0.70 | 0.08 |
| BSU35300 | <i>secA</i> | 0.46 | 0.00 | 0.54 | 0.00 |
| BSU35310 | <i>yvyD</i> | 0.85 | 0.41 | 1.94 | 0.01 |
| BSU35319 | <i>yvzG</i> | 1.38 | 0.03 | 1.24 | 0.40 |
| BSU35320 | <i>fliT</i> | 0.98 | 0.91 | 0.93 | 0.44 |
| BSU35330 | <i>fliS</i> | 0.91 | 0.55 | 0.91 | 0.49 |
| BSU35340 | <i>fliD</i> | 0.74 | 0.04 | 0.62 | 0.01 |
| BSU35350 | <i>yvyC</i> | 0.79 | 0.17 | 1.77 | 0.10 |
| BSU35360 | <i>hag</i>  | 1.34 | 0.01 | 1.68 | 0.01 |
| BSU35370 | <i>csrA</i> | 2.25 | 0.00 | 3.11 | 0.00 |
| BSU35380 | <i>yviF</i> | 0.67 | 0.00 | 0.66 | 0.09 |
| BSU35400 | <i>flgL</i> | 0.98 | 0.89 | 1.21 | 0.13 |
| BSU35410 | <i>flgK</i> | 0.67 | 0.05 | 0.64 | 0.00 |
| BSU35420 | <i>yvyG</i> | 0.86 | 0.38 | 0.95 | 0.52 |
| BSU35430 | <i>flgM</i> | 1.03 | 0.88 | 1.05 | 0.87 |
| BSU35440 | <i>yvyF</i> | 0.75 | 0.05 | 0.80 | 0.30 |
| BSU35480 | <i>yviA</i> | 0.60 | 0.00 | 0.87 | 0.13 |
| BSU35490 | <i>degU</i> | 0.91 | 0.27 | 1.38 | 0.00 |
| BSU35500 | <i>degS</i> | 0.39 | 0.00 | 0.26 | 0.01 |
| BSU35510 | <i>yvyE</i> | 1.04 | 0.76 | 2.98 | 0.00 |
| BSU35520 | <i>yvhJ</i> | 0.47 | 0.00 | 0.56 | 0.01 |
| BSU35530 | <i>tagO</i> | 1.02 | 0.87 | 1.28 | 0.17 |
| BSU35620 | <i>lytC</i> | 0.53 | 0.00 | 0.86 | 0.33 |
| BSU35630 | <i>lytB</i> | 0.96 | 0.58 | 1.66 | 0.08 |
| BSU35640 | <i>lytA</i> | 0.76 | 0.15 | 0.78 | 0.27 |
| BSU35650 | <i>lytR</i> | 0.67 | 0.04 | 0.74 | 0.05 |
| BSU35660 | <i>mnaA</i> | 0.49 | 0.00 | 0.58 | 0.00 |
| BSU35670 | <i>gtaB</i> | 0.91 | 0.16 | 1.05 | 0.76 |
| BSU35690 | <i>ggaA</i> | 0.37 | 0.10 | 0.47 | 0.22 |
| BSU35700 | <i>tagH</i> | 0.52 | 0.00 | 0.75 | 0.21 |
| BSU35710 | <i>tagG</i> | 0.66 | 0.11 | 0.95 | 0.83 |
| BSU35720 | <i>tagF</i> | 0.51 | 0.01 | 0.89 | 0.73 |
| BSU35730 | <i>tagE</i> | 0.52 | 0.02 | 0.69 | 0.35 |
| BSU35740 | <i>tagD</i> | 0.52 | 0.02 | 0.61 | 0.26 |
| BSU35750 | <i>tagA</i> | 0.56 | 0.02 | 0.65 | 0.12 |
| BSU35760 | <i>tagB</i> | 1.04 | 0.94 | 1.91 | 0.39 |
| BSU35780 | <i>lytD</i> | 0.40 | 0.01 | 0.86 | 0.22 |
| BSU35790 | <i>yvyI</i> | 1.12 | 0.33 | 1.52 | 0.05 |

|          |             |      |      |      |      |
|----------|-------------|------|------|------|------|
| BSU35830 | <i>ywtG</i> | 0.54 | 0.01 | 0.43 | 0.01 |
| BSU35840 | <i>ywtF</i> | 0.46 | 0.00 | 0.78 | 0.13 |
| BSU35850 | <i>ywtE</i> | 0.58 | 0.00 | 0.97 | 0.72 |
| BSU35860 | <i>pgdS</i> | 0.41 | 0.00 | 0.47 | 0.01 |
| BSU35910 | <i>rbsR</i> | 1.76 | 0.09 | 1.08 | 0.66 |
| BSU35920 | <i>rbsK</i> | 0.49 | 0.03 | 0.79 | 0.18 |
| BSU35930 | <i>rbsD</i> | 1.21 | 0.54 | 1.10 | 0.70 |
| BSU35940 | <i>rbsA</i> | 0.55 | 0.09 | 0.94 | 0.73 |
| BSU35950 | <i>rbsC</i> | 0.75 | 0.27 | 0.96 | 0.87 |
| BSU35960 | <i>rbsB</i> | 0.74 | 0.18 | 0.86 | 0.49 |
| BSU35970 | <i>ywsB</i> | 1.07 | 0.74 | 1.44 | 0.30 |
| BSU35980 | <i>ywsA</i> | 1.58 | 0.13 | 0.54 | 0.00 |
| BSU35990 | <i>ywrO</i> | 0.70 | 0.01 | 0.77 | 0.02 |
| BSU36000 | <i>alsD</i> | 1.10 | 0.48 | 1.26 | 0.07 |
| BSU36010 | <i>alsS</i> | 0.74 | 0.02 | 0.72 | 0.03 |
| BSU36020 | <i>alsR</i> | 1.41 | 0.05 | 1.98 | 0.01 |
| BSU36070 | <i>cotG</i> | 0.88 | 0.37 | 0.67 | 0.56 |
| BSU36080 | <i>ywrF</i> | 0.73 | 0.02 | 0.95 | 0.49 |
| BSU36090 | <i>ywrE</i> | 0.79 | 0.32 | 0.93 | 0.93 |
| BSU36110 | <i>ywrC</i> | 0.55 | 0.00 | 0.57 | 0.01 |
| BSU36120 | <i>ywrB</i> | 1.10 | 0.10 | 1.00 | 0.85 |
| BSU36130 | <i>ywrA</i> | 1.26 | 0.12 | 1.64 | 0.07 |
| BSU36170 | <i>ywqL</i> | 0.83 | 0.10 | 0.85 | 0.07 |
| BSU36230 | <i>ywqF</i> | 0.91 | 0.25 | 2.07 | 0.00 |
| BSU36250 | <i>ptkA</i> | 0.74 | 0.05 | 0.66 | 0.04 |
| BSU36269 | <i>ywzD</i> | 1.65 | 0.07 | 1.40 | 0.34 |
| BSU36280 | <i>ywqA</i> | 0.41 | 0.00 | 0.59 | 0.01 |
| BSU36290 | <i>ywpJ</i> | 0.40 | 0.00 | 0.69 | 0.15 |
| BSU36330 | <i>ywpF</i> | 0.70 | 0.01 | 1.04 | 0.97 |
| BSU36360 | <i>mscL</i> | 1.49 | 0.02 | 1.17 | 0.23 |
| BSU36370 | <i>fabZ</i> | 0.92 | 0.13 | 0.91 | 0.48 |
| BSU36380 | <i>rapD</i> | 1.04 | 0.89 | 1.31 | 0.55 |
| BSU36390 | <i>flhP</i> | 0.70 | 0.01 | 0.92 | 0.08 |
| BSU36400 | <i>flhO</i> | 0.50 | 0.01 | 0.60 | 0.01 |
| BSU36410 | <i>mbl</i>  | 0.60 | 0.00 | 0.94 | 0.28 |
| BSU36480 | <i>ywoD</i> | 0.95 | 0.43 | 0.93 | 0.47 |
| BSU36490 | <i>ywoC</i> | 0.79 | 0.04 | 0.81 | 0.18 |
| BSU36510 | <i>amtB</i> | 0.32 | 0.01 | 0.41 | 0.01 |
| BSU36520 | <i>glnK</i> | 1.60 | 0.06 | 1.64 | 0.12 |
| BSU36530 | <i>bcrC</i> | 0.55 | 0.02 | 0.65 | 0.02 |
| BSU36560 | <i>ywnH</i> | 0.45 | 0.00 | 0.65 | 0.05 |
| BSU36570 | <i>ywnG</i> | 0.47 | 0.00 | 0.50 | 0.00 |
| BSU36580 | <i>ywnF</i> | 0.59 | 0.12 | 0.81 | 0.39 |
| BSU36590 | <i>clsA</i> | 0.63 | 0.01 | 0.83 | 0.25 |
| BSU36610 | <i>ywnC</i> | 1.00 | 0.99 | 0.98 | 0.89 |
| BSU36630 | <i>ywnA</i> | 1.06 | 0.63 | 1.56 | 0.14 |
| BSU36670 | <i>csbD</i> | 1.12 | 0.67 | 1.06 | 0.81 |

|          |              |      |      |      |      |
|----------|--------------|------|------|------|------|
| BSU36690 | <i>rapB</i>  | 0.66 | 0.03 | 1.04 | 0.95 |
| BSU36700 | <i>moaA</i>  | 0.71 | 0.04 | 0.87 | 0.04 |
| BSU36710 | <i>fdhD</i>  | 0.77 | 0.05 | 1.06 | 0.42 |
| BSU36720 | <i>ywmE</i>  | 0.41 | 0.01 | 0.35 | 0.00 |
| BSU36760 | <i>murAA</i> | 0.34 | 0.00 | 0.40 | 0.00 |
| BSU36770 | <i>ywmB</i>  | 0.54 | 0.01 | 2.34 | 0.00 |
| BSU36780 | <i>ywzB</i>  | 0.97 | 0.61 | 1.48 | 0.04 |
| BSU36790 | <i>ywmA</i>  | 3.48 | 0.00 | 3.84 | 0.02 |
| BSU36800 | <i>atpC</i>  | 1.65 | 0.01 | 1.68 | 0.05 |
| BSU36810 | <i>atpD</i>  | 0.57 | 0.02 | 0.63 | 0.01 |
| BSU36820 | <i>atpG</i>  | 0.95 | 0.57 | 0.92 | 0.11 |
| BSU36830 | <i>atpA</i>  | 0.64 | 0.03 | 0.92 | 0.55 |
| BSU36840 | <i>atpH</i>  | 0.90 | 0.25 | 0.86 | 0.05 |
| BSU36850 | <i>atpF</i>  | 0.87 | 0.11 | 0.80 | 0.04 |
| BSU36860 | <i>atpE</i>  | 1.12 | 0.30 | 0.89 | 0.38 |
| BSU36870 | <i>atpB</i>  | 0.61 | 0.00 | 0.77 | 0.05 |
| BSU36880 | <i>atpI</i>  | 0.91 | 0.29 | 4.80 | 0.00 |
| BSU36890 | <i>upp</i>   | 1.06 | 0.50 | 1.15 | 0.48 |
| BSU36900 | <i>glyA</i>  | 0.83 | 0.17 | 1.12 | 0.42 |
| BSU36910 | <i>ywlG</i>  | 1.44 | 0.04 | 1.37 | 0.07 |
| BSU36920 | <i>ywlF</i>  | 0.50 | 0.00 | 0.69 | 0.06 |
| BSU36930 | <i>ywlE</i>  | 0.71 | 0.01 | 0.77 | 0.02 |
| BSU36950 | <i>ywlC</i>  | 0.41 | 0.00 | 0.42 | 0.01 |
| BSU36990 | <i>ywkF</i>  | 2.20 | 0.00 | 2.44 | 0.00 |
| BSU37000 | <i>prmC</i>  | 2.34 | 0.03 | 1.30 | 0.09 |
| BSU37010 | <i>prfA</i>  | 0.44 | 0.01 | 0.52 | 0.00 |
| BSU37020 | <i>ywkD</i>  | 0.62 | 0.00 | 0.91 | 0.21 |
| BSU37030 | <i>racA</i>  | 1.82 | 0.01 | 2.03 | 0.00 |
| BSU37060 | <i>tdk</i>   | 1.04 | 0.83 | 1.03 | 0.92 |
| BSU37070 | <i>rpmE</i>  | 1.17 | 0.24 | 1.54 | 0.13 |
| BSU37080 | <i>rho</i>   | 0.56 | 0.00 | 0.65 | 0.01 |
| BSU37090 | <i>glpX</i>  | 0.87 | 0.40 | 1.26 | 0.26 |
| BSU37100 | <i>murAB</i> | 0.80 | 0.07 | 0.80 | 0.23 |
| BSU37110 | <i>ywjH</i>  | 0.92 | 0.13 | 1.11 | 0.21 |
| BSU37120 | <i>fbaA</i>  | 0.90 | 0.01 | 0.98 | 0.64 |
| BSU37130 | <i>spo0F</i> | 0.48 | 0.00 | 0.39 | 0.00 |
| BSU37140 | <i>ywjG</i>  | 0.99 | 0.82 | 1.04 | 0.84 |
| BSU37150 | <i>pyrG</i>  | 0.48 | 0.00 | 0.62 | 0.10 |
| BSU37160 | <i>rpoE</i>  | 0.39 | 0.00 | 0.36 | 0.00 |
| BSU37210 | <i>ywjC</i>  | 0.86 | 0.41 | 0.82 | 0.47 |
| BSU37220 | <i>ywjB</i>  | 1.25 | 0.14 | 1.65 | 0.04 |
| BSU37230 | <i>ywjA</i>  | 0.78 | 0.14 | 0.70 | 0.15 |
| BSU37240 | <i>ywiE</i>  | 0.89 | 0.33 | 0.59 | 0.01 |
| BSU37250 | <i>narI</i>  | 1.38 | 0.67 | 1.10 | 0.60 |
| BSU37260 | <i>narJ</i>  | 1.27 | 0.83 | 1.23 | 0.29 |
| BSU37270 | <i>narH</i>  | 1.14 | 0.80 | 1.05 | 0.80 |
| BSU37280 | <i>narG</i>  | 1.16 | 0.93 | 0.70 | 0.12 |

|          |             |      |      |      |      |
|----------|-------------|------|------|------|------|
| BSU37310 | <i>fnr</i>  | 0.89 | 0.46 | 1.10 | 0.24 |
| BSU37330 | <i>argS</i> | 0.45 | 0.02 | 0.53 | 0.01 |
| BSU37340 | <i>ywiB</i> | 0.73 | 0.06 | 1.08 | 0.73 |
| BSU37350 | <i>sboA</i> | 1.36 | 0.49 | 1.18 | 0.43 |
| BSU37360 | <i>sboX</i> | 1.82 | 0.16 | 2.07 | 0.15 |
| BSU37370 | <i>albA</i> | 0.57 | 0.01 | 0.36 | 0.00 |
| BSU37380 | <i>albB</i> | 1.11 | 0.70 | 1.18 | 0.08 |
| BSU37390 | <i>albC</i> | 1.96 | 0.07 | 2.29 | 0.00 |
| BSU37460 | <i>rapF</i> | 0.53 | 0.00 | 2.68 | 0.02 |
| BSU37470 | <i>phrF</i> | 2.27 | 0.03 | 2.14 | 0.05 |
| BSU37490 | <i>speB</i> | 0.60 | 0.04 | 0.74 | 0.22 |
| BSU37500 | <i>speE</i> | 0.28 | 0.00 | 0.43 | 0.00 |
| BSU37520 | <i>ywhD</i> | 0.67 | 0.00 | 0.88 | 0.35 |
| BSU37530 | <i>ywhC</i> | 0.43 | 0.00 | 0.44 | 0.00 |
| BSU37540 | <i>ywhB</i> | 1.73 | 0.01 | 1.39 | 0.08 |
| BSU37550 | <i>ywhA</i> | 0.65 | 0.01 | 0.38 | 0.02 |
| BSU37590 | <i>ywgA</i> | 1.31 | 0.05 | 1.77 | 0.00 |
| BSU37600 | <i>ywfO</i> | 0.43 | 0.00 | 0.69 | 0.01 |
| BSU37640 | <i>ywfL</i> | 0.75 | 0.08 | 1.33 | 0.02 |
| BSU37660 | <i>eutD</i> | 0.84 | 0.21 | 0.96 | 0.54 |
| BSU37670 | <i>ywfl</i> | 0.73 | 0.02 | 0.67 | 0.00 |
| BSU37690 | <i>ywfG</i> | 0.85 | 0.16 | 0.96 | 0.69 |
| BSU37780 | <i>rocA</i> | 0.73 | 0.01 | 0.79 | 0.08 |
| BSU37800 | <i>yweA</i> | 1.26 | 0.01 | 1.66 | 0.01 |
| BSU37930 | <i>ywdK</i> | 1.72 | 0.00 | 2.04 | 0.00 |
| BSU37940 | <i>ywdJ</i> | 0.58 | 0.00 | 0.71 | 0.03 |
| BSU37950 | <i>ywdI</i> | 0.51 | 0.00 | 0.38 | 0.00 |
| BSU37970 | <i>ung</i>  | 0.99 | 0.83 | 1.17 | 0.62 |
| BSU37980 | <i>ywdF</i> | 0.59 | 0.00 | 0.59 | 0.03 |
| BSU38020 | <i>thiD</i> | 0.59 | 0.02 | 0.77 | 0.12 |
| BSU38030 | <i>ywdA</i> | 1.40 | 0.12 | 1.52 | 0.18 |
| BSU38040 | <i>sacA</i> | 0.63 | 0.03 | 0.97 | 0.76 |
| BSU38050 | <i>sacP</i> | 0.40 | 0.00 | 0.46 | 0.03 |
| BSU38060 | <i>ywcl</i> | 1.16 | 0.38 | 0.93 | 0.47 |
| BSU38070 | <i>sacT</i> | 0.15 | 0.00 | 0.33 | 0.00 |
| BSU38100 | <i>ywcH</i> | 0.50 | 0.01 | 0.77 | 0.07 |
| BSU38110 | <i>nfrA</i> | 1.12 | 0.18 | 1.07 | 0.41 |
| BSU38120 | <i>rodA</i> | 0.35 | 0.00 | 0.43 | 0.02 |
| BSU38140 | <i>qoxD</i> | 2.74 | 0.01 | 2.60 | 0.01 |
| BSU38150 | <i>qoxC</i> | 0.73 | 0.03 | 0.69 | 0.01 |
| BSU38160 | <i>qoxB</i> | 0.68 | 0.06 | 0.76 | 0.01 |
| BSU38170 | <i>qoxA</i> | 0.99 | 0.85 | 0.80 | 0.06 |
| BSU38180 | <i>ywzA</i> | 0.77 | 0.18 | 0.69 | 0.03 |
| BSU38190 | <i>galT</i> | 0.96 | 0.72 | 1.19 | 0.17 |
| BSU38200 | <i>galK</i> | 0.72 | 0.00 | 0.57 | 0.01 |
| BSU38210 | <i>ywcD</i> | 0.63 | 0.06 | 0.61 | 0.03 |
| BSU38229 | <i>slrA</i> | 1.28 | 0.04 | 1.17 | 0.55 |

|          |             |      |      |       |      |
|----------|-------------|------|------|-------|------|
| BSU38250 | <i>ywbO</i> | 0.80 | 0.02 | 0.92  | 0.36 |
| BSU38260 | <i>efeN</i> | 0.82 | 0.20 | 1.18  | 0.09 |
| BSU38270 | <i>efeM</i> | 0.83 | 0.22 | 0.78  | 0.04 |
| BSU38280 | <i>efeU</i> | 0.29 | 0.00 | 0.30  | 0.00 |
| BSU38290 | <i>thiE</i> | 0.93 | 0.62 | 1.08  | 0.65 |
| BSU38300 | <i>thiM</i> | 0.69 | 0.13 | 0.84  | 0.48 |
| BSU38310 | <i>ywbl</i> | 0.36 | 0.00 | 0.36  | 0.00 |
| BSU38320 | <i>ywbH</i> | 0.67 | 0.01 | 0.55  | 0.02 |
| BSU38330 | <i>lrgB</i> | 0.87 | 0.46 | 0.97  | 0.69 |
| BSU38340 | <i>ywbF</i> | 0.88 | 0.19 | 10.80 | 0.00 |
| BSU38350 | <i>ywbE</i> | 2.24 | 0.01 | 1.95  | 0.07 |
| BSU38360 | <i>ywbD</i> | 0.44 | 0.00 | 0.55  | 0.00 |
| BSU38370 | <i>ywbC</i> | 0.61 | 0.00 | 0.85  | 0.13 |
| BSU38430 | <i>gspA</i> | 0.77 | 0.08 | 0.70  | 0.04 |
| BSU38480 | <i>ywaC</i> | 1.03 | 0.98 | 1.24  | 0.41 |
| BSU38490 | <i>menA</i> | 0.48 | 0.00 | 0.66  | 0.05 |
| BSU38499 | <i>ywzH</i> | 0.75 | 0.00 | 0.82  | 0.34 |
| BSU38500 | <i>dltA</i> | 0.55 | 0.00 | 0.58  | 0.00 |
| BSU38510 | <i>dltB</i> | 0.81 | 0.00 | 0.98  | 0.73 |
| BSU38520 | <i>dltC</i> | 0.93 | 0.35 | 0.85  | 0.55 |
| BSU38530 | <i>dltD</i> | 0.75 | 0.00 | 0.82  | 0.01 |
| BSU38540 | <i>dltE</i> | 1.18 | 0.03 | 1.25  | 0.33 |
| BSU38550 | <i>ywaA</i> | 0.76 | 0.02 | 0.83  | 0.12 |
| BSU38560 | <i>licH</i> | 0.83 | 0.57 | 1.24  | 0.30 |
| BSU38570 | <i>licA</i> | 0.78 | 0.40 | 1.01  | 0.94 |
| BSU38640 | <i>yxIH</i> | 0.47 | 0.01 | 1.07  | 0.57 |
| BSU38650 | <i>yxIG</i> | 0.96 | 0.89 | 1.03  | 0.94 |
| BSU38660 | <i>yxIF</i> | 0.90 | 0.35 | 1.00  | 0.97 |
| BSU38670 | <i>yxIE</i> | 1.12 | 0.29 | 0.92  | 0.43 |
| BSU38680 | <i>yxID</i> | 0.97 | 0.69 | 1.01  | 0.92 |
| BSU38690 | <i>yxIC</i> | 0.83 | 0.14 | 0.77  | 0.21 |
| BSU38700 | <i>sigY</i> | 0.58 | 0.00 | 0.79  | 0.01 |
| BSU38730 | <i>cydD</i> | 1.27 | 0.68 | 1.24  | 0.27 |
| BSU38740 | <i>cydC</i> | 1.17 | 0.84 | 0.88  | 0.38 |
| BSU38750 | <i>cydB</i> | 0.99 | 0.86 | 0.82  | 0.08 |
| BSU38760 | <i>cydA</i> | 0.48 | 0.00 | 0.36  | 0.00 |
| BSU38770 | <i>cimH</i> | 3.31 | 0.01 | 2.26  | 0.00 |
| BSU38790 | <i>yxzE</i> | 1.20 | 0.44 | 1.17  | 0.17 |
| BSU38810 | <i>msmX</i> | 0.81 | 0.09 | 0.53  | 0.01 |
| BSU38850 | <i>yxkC</i> | 0.88 | 0.20 | 1.15  | 0.63 |
| BSU38860 | <i>galE</i> | 0.48 | 0.01 | 0.56  | 0.02 |
| BSU38890 | <i>yxjN</i> | 0.75 | 0.03 | 0.75  | 0.04 |
| BSU38920 | <i>pepT</i> | 0.67 | 0.06 | 1.58  | 0.00 |
| BSU38930 | <i>yxjJ</i> | 1.03 | 0.90 | 1.92  | 0.12 |
| BSU38940 | <i>yxjI</i> | 0.79 | 0.40 | 0.85  | 0.33 |
| BSU38950 | <i>yxjH</i> | 0.92 | 0.45 | 0.95  | 0.73 |
| BSU38960 | <i>yxjG</i> | 0.69 | 0.04 | 0.93  | 0.63 |

|          |             |      |      |      |      |
|----------|-------------|------|------|------|------|
| BSU39010 | <i>yxjB</i> | 1.68 | 0.00 | 3.30 | 0.00 |
| BSU39020 | <i>yxjA</i> | 0.42 | 0.02 | 0.56 | 0.04 |
| BSU39040 | <i>yxjS</i> | 1.54 | 0.00 | 1.70 | 0.02 |
| BSU39050 | <i>katE</i> | 0.61 | 0.00 | 0.47 | 0.01 |
| BSU39070 | <i>bglS</i> | 0.79 | 0.13 | 1.02 | 0.91 |
| BSU39080 | <i>licT</i> | 0.85 | 0.19 | 1.22 | 0.08 |
| BSU39110 | <i>deaD</i> | 0.79 | 0.02 | 0.97 | 0.69 |
| BSU39120 | <i>yxjM</i> | 0.81 | 0.12 | 1.01 | 0.92 |
| BSU39139 | <i>yxzJ</i> | 1.06 | 0.86 | 1.05 | 0.78 |
| BSU39140 | <i>yxjK</i> | 0.79 | 0.11 | 0.82 | 0.09 |
| BSU39150 | <i>yxjI</i> | 0.90 | 0.10 | 1.02 | 0.69 |
| BSU39160 | <i>yxjL</i> | 1.17 | 0.27 | 1.31 | 0.05 |
| BSU39170 | <i>yxzG</i> | 0.93 | 0.59 | 0.94 | 0.54 |
| BSU39180 | <i>yxjH</i> | 1.43 | 0.16 | 1.48 | 0.16 |
| BSU39190 | <i>yxjG</i> | 0.93 | 0.72 | 0.99 | 0.98 |
| BSU39200 | <i>yxzC</i> | 0.78 | 0.33 | 0.85 | 0.44 |
| BSU39210 | <i>yxjF</i> | 1.00 | 0.98 | 0.98 | 0.71 |
| BSU39220 | <i>yxjG</i> | 1.59 | 0.09 | 2.84 | 0.21 |
| BSU39230 | <i>wapA</i> | 0.71 | 0.02 | 0.84 | 0.10 |
| BSU39250 | <i>yxjE</i> | 1.37 | 0.08 | 1.81 | 0.00 |
| BSU39260 | <i>bglH</i> | 0.50 | 0.03 | 0.76 | 0.12 |
| BSU39270 | <i>bglP</i> | 0.99 | 0.89 | 0.82 | 0.45 |
| BSU39280 | <i>yxjE</i> | 1.48 | 0.13 | 1.69 | 0.24 |
| BSU39290 | <i>yxjD</i> | 0.88 | 0.76 | 0.70 | 0.73 |
| BSU39400 | <i>pdp</i>  | 0.92 | 0.59 | 1.06 | 0.72 |
| BSU39410 | <i>nupC</i> | 0.85 | 0.29 | 0.87 | 0.19 |
| BSU39420 | <i>deoC</i> | 0.57 | 0.01 | 0.62 | 0.01 |
| BSU39430 | <i>deoR</i> | 1.50 | 0.02 | 0.94 | 0.71 |
| BSU39440 | <i>yxjB</i> | 0.47 | 0.01 | 0.35 | 0.00 |
| BSU39550 | <i>yxjH</i> | 1.02 | 0.95 | 1.21 | 0.22 |
| BSU39560 | <i>yxjG</i> | 0.71 | 0.02 | 0.83 | 0.09 |
| BSU39570 | <i>yxjF</i> | 0.90 | 0.37 | 1.04 | 0.75 |
| BSU39580 | <i>yxjE</i> | 1.37 | 0.11 | 1.37 | 0.01 |
| BSU39600 | <i>yxjC</i> | 1.22 | 0.16 | 1.52 | 0.07 |
| BSU39610 | <i>yxjB</i> | 0.75 | 0.04 | 0.92 | 0.30 |
| BSU39670 | <i>iolJ</i> | 0.81 | 0.12 | 1.00 | 0.99 |
| BSU39680 | <i>iolI</i> | 0.98 | 0.79 | 1.02 | 0.91 |
| BSU39690 | <i>iolH</i> | 1.06 | 0.66 | 0.93 | 0.59 |
| BSU39700 | <i>iolG</i> | 0.83 | 0.05 | 0.94 | 0.58 |
| BSU39710 | <i>iolF</i> | 0.98 | 0.57 | 0.93 | 0.66 |
| BSU39720 | <i>iolE</i> | 1.01 | 0.92 | 0.94 | 0.59 |
| BSU39730 | <i>iolD</i> | 0.80 | 0.06 | 0.93 | 0.75 |
| BSU39740 | <i>iolC</i> | 0.74 | 0.05 | 0.90 | 0.48 |
| BSU39770 | <i>iolR</i> | 0.36 | 0.00 | 0.52 | 0.00 |
| BSU39780 | <i>iolS</i> | 1.28 | 0.04 | 1.29 | 0.05 |
| BSU39790 | <i>yxjE</i> | 0.54 | 0.01 | 0.58 | 0.00 |
| BSU39800 | <i>yxjD</i> | 1.95 | 0.00 | 2.02 | 0.00 |



|          |             |      |      |      |      |
|----------|-------------|------|------|------|------|
| BSU39810 | <i>csbC</i> | 0.79 | 0.01 | 0.58 | 0.07 |
| BSU39820 | <i>htpG</i> | 0.51 | 0.00 | 0.57 | 0.00 |
| BSU39830 | <i>ycxA</i> | 1.46 | 0.08 | 1.62 | 0.08 |
| BSU39840 | <i>ycxB</i> | 0.80 | 0.12 | 0.80 | 0.26 |
| BSU39940 | <i>ycxA</i> | 0.76 | 0.18 | 0.84 | 0.17 |
| BSU39960 | <i>ycxA</i> | 0.86 | 0.06 | 0.93 | 0.80 |
| BSU39990 | <i>ycxA</i> | 1.50 | 0.03 | 1.60 | 0.05 |
| BSU40000 | <i>ycxA</i> | 0.63 | 0.02 | 0.68 | 0.17 |
| BSU40030 | <i>ycxB</i> | 0.67 | 0.11 | 0.66 | 0.02 |
| BSU40050 | <i>gntR</i> | 0.53 | 0.06 | 0.51 | 0.02 |
| BSU40060 | <i>gntK</i> | 0.52 | 0.04 | 0.57 | 0.02 |
| BSU40070 | <i>gntP</i> | 0.10 | 0.00 | 0.42 | 0.01 |
| BSU40080 | <i>gntZ</i> | 0.76 | 0.02 | 0.97 | 0.69 |
| BSU40090 | <i>ahpC</i> | 0.66 | 0.03 | 0.59 | 0.02 |
| BSU40100 | <i>ahpF</i> | 0.69 | 0.19 | 0.73 | 0.15 |
| BSU40110 | <i>bglA</i> | 0.62 | 0.01 | 1.13 | 0.19 |
| BSU40120 | <i>yyzE</i> | 1.05 | 0.79 | 1.71 | 0.08 |
| BSU40140 | <i>yydJ</i> | 0.69 | 0.33 | 0.66 | 0.60 |
| BSU40190 | <i>fbp</i>  | 0.28 | 0.00 | 0.48 | 0.00 |
| BSU40200 | <i>yydD</i> | 0.89 | 0.74 | 0.74 | 0.74 |
| BSU40210 | <i>yydC</i> | 1.08 | 0.91 | 1.14 | 0.94 |
| BSU40220 | <i>yydB</i> | 0.93 | 0.66 | 1.14 | 0.86 |
| BSU40230 | <i>yydA</i> | 0.53 | 0.00 | 0.92 | 0.10 |
| BSU40300 | <i>rapG</i> | 0.23 | 0.00 | 0.66 | 0.01 |
| BSU40310 | <i>phrG</i> | 1.53 | 0.01 | 2.48 | 0.09 |
| BSU40320 | <i>argI</i> | 0.96 | 0.82 | 1.36 | 0.09 |
| BSU40330 | <i>rocE</i> | 0.75 | 0.15 | 0.67 | 0.02 |
| BSU40340 | <i>rocD</i> | 0.95 | 0.69 | 0.85 | 0.22 |
| BSU40360 | <i>htrC</i> | 1.10 | 0.42 | 1.26 | 0.15 |
| BSU40370 | <i>yycJ</i> | 0.80 | 0.16 | 0.97 | 0.85 |
| BSU40380 | <i>yycI</i> | 1.11 | 0.06 | 1.09 | 0.17 |
| BSU40390 | <i>walH</i> | 0.90 | 0.07 | 0.93 | 0.13 |
| BSU40400 | <i>walK</i> | 0.91 | 0.14 | 0.91 | 0.09 |
| BSU40410 | <i>walR</i> | 0.78 | 0.12 | 0.51 | 0.00 |
| BSU40420 | <i>purA</i> | 0.89 | 0.41 | 0.79 | 0.19 |
| BSU40440 | <i>dnaC</i> | 0.32 | 0.01 | 0.41 | 0.00 |
| BSU40470 | <i>yycC</i> | 0.45 | 0.00 | 0.46 | 0.04 |
| BSU40480 | <i>yycB</i> | 0.78 | 0.19 | 0.99 | 0.88 |
| BSU40500 | <i>rplI</i> | 0.90 | 0.33 | 1.21 | 0.01 |
| BSU40510 | <i>yybT</i> | 0.37 | 0.00 | 0.53 | 0.01 |
| BSU40520 | <i>yybS</i> | 0.94 | 0.66 | 0.92 | 0.58 |
| BSU40529 | <i>yyzH</i> | 1.14 | 0.65 | 1.16 | 0.50 |
| BSU40550 | <i>ppaC</i> | 0.72 | 0.00 | 0.76 | 0.07 |
| BSU40580 | <i>yybN</i> | 0.69 | 0.00 | 0.72 | 0.37 |
| BSU40590 | <i>yybM</i> | 1.46 | 0.36 | 1.20 | 0.89 |
| BSU40620 | <i>yybJ</i> | 0.60 | 0.04 | 0.60 | 0.44 |
| BSU40650 | <i>yybG</i> | 0.58 | 0.02 | 0.92 | 0.71 |

|          |                |      |      |      |      |
|----------|----------------|------|------|------|------|
| BSU40660 | <i>yybF</i>    | 0.71 | 0.17 | 0.84 | 0.01 |
| BSU40750 | <i>yyaQ</i>    | 0.83 | 0.18 | 0.97 | 0.90 |
| BSU40760 | <i>yyaP</i>    | 0.82 | 0.31 | 0.86 | 0.81 |
| BSU40780 | <i>tetL</i>    | 0.46 | 0.01 | 0.47 | 0.06 |
| BSU40820 | <i>yyaL</i>    | 0.67 | 0.02 | 0.67 | 0.01 |
| BSU40830 | <i>yyaK</i>    | 0.97 | 0.70 | 0.87 | 0.52 |
| BSU40880 | <i>exoAA</i>   | 0.95 | 0.69 | 1.05 | 0.69 |
| BSU40890 | <i>rpsR</i>    | 1.85 | 0.01 | 2.00 | 0.01 |
| BSU40900 | <i>ssbA</i>    | 0.95 | 0.09 | 0.93 | 0.07 |
| BSU40910 | <i>rpsF</i>    | 0.66 | 0.01 | 1.31 | 0.20 |
| BSU40920 | <i>yyaF</i>    | 0.54 | 0.00 | 0.57 | 0.00 |
| BSU40930 | <i>yyaE</i>    | 0.36 | 0.00 | 0.64 | 0.00 |
| BSU40939 | <i>yyzM</i>    | 1.24 | 0.11 | 1.18 | 0.47 |
| BSU40960 | <i>parB</i>    | 0.91 | 0.24 | 1.29 | 0.42 |
| BSU40970 | <i>parA</i>    | 0.64 | 0.00 | 0.74 | 0.03 |
| BSU40980 | <i>yyaB</i>    | 1.48 | 0.05 | 1.53 | 0.42 |
| BSU40990 | <i>noc</i>     | 1.32 | 0.10 | 1.20 | 0.13 |
| BSU41000 | <i>gidB</i>    | 0.86 | 0.09 | 0.85 | 0.15 |
| BSU41010 | <i>gidA</i>    | 0.42 | 0.00 | 0.61 | 0.00 |
| BSU41020 | <i>trmE</i>    | 0.38 | 0.00 | 0.36 | 0.00 |
| BSU41030 | <i>jag</i>     | 1.22 | 0.12 | 1.33 | 0.01 |
| BSU41040 | <i>spolIII</i> | 0.49 | 0.00 | 0.60 | 0.03 |
| BSU41050 | <i>rnpA</i>    | 1.10 | 0.32 | 1.04 | 0.83 |
| BSU41060 | <i>rpmH</i>    | 1.00 | 0.95 | 1.22 | 0.61 |

**Table S4. Genes with RR > 1.5**

| Gene name    | 5'/3' ratio in WT | 5'/3' ratio in <i>pnpA</i> | Ratio of ratios | P value |
|--------------|-------------------|----------------------------|-----------------|---------|
| <i>rapA</i>  | 3.2               | 33.6                       | 10.5            | 0.02    |
| <i>sunT</i>  | 1.1               | 8.2                        | 7.5             | 0.00    |
| <i>yabE</i>  | 0.4               | 2.2                        | 5.6             | 0.00    |
| <i>atpI</i>  | 0.9               | 4.8                        | 5.3             | 0.00    |
| <i>ygaE</i>  | 0.8               | 4.3                        | 5.1             | 0.00    |
| <i>rapF</i>  | 0.5               | 2.7                        | 5.0             | 0.04    |
| <i>yukJ</i>  | 0.9               | 4.2                        | 4.6             | 0.00    |
| <i>rsiX</i>  | 0.2               | 1.0                        | 4.6             | 0.02    |
| <i>gntP</i>  | 0.1               | 0.4                        | 4.4             | 0.00    |
| <i>ywmB</i>  | 0.5               | 2.3                        | 4.3             | 0.01    |
| <i>opuE</i>  | 1.3               | 5.4                        | 4.3             | 0.00    |
| <i>yocH</i>  | 1.1               | 4.4                        | 4.1             | 0.01    |
| <i>yIIb</i>  | 1.2               | 4.4                        | 3.7             | 0.01    |
| <i>yrbE</i>  | 0.1               | 0.3                        | 3.6             | 0.00    |
| <i>mntA</i>  | 1.0               | 3.4                        | 3.4             | 0.00    |
| <i>yrhP</i>  | 0.9               | 3.1                        | 3.3             | 0.01    |
| <i>mgtE</i>  | 0.7               | 2.3                        | 3.1             | 0.00    |
| <i>ykyB</i>  | 0.9               | 2.7                        | 3.0             | 0.00    |
| <i>yerB</i>  | 0.6               | 1.8                        | 2.9             | 0.00    |
| <i>yvyE</i>  | 1.0               | 3.0                        | 2.9             | 0.00    |
| <i>rapC</i>  | 0.3               | 0.8                        | 2.8             | 0.00    |
| <i>mecA</i>  | 1.2               | 3.3                        | 2.7             | 0.00    |
| <i>dat</i>   | 0.7               | 1.9                        | 2.7             | 0.01    |
| <i>asnB</i>  | 0.3               | 0.9                        | 2.6             | 0.00    |
| <i>pgcA</i>  | 0.4               | 0.9                        | 2.6             | 0.00    |
| <i>yuxH</i>  | 0.7               | 1.8                        | 2.6             | 0.01    |
| <i>yoZS</i>  | 1.1               | 2.8                        | 2.6             | 0.05    |
| <i>valS</i>  | 0.2               | 0.6                        | 2.5             | 0.00    |
| <i>amyE</i>  | 0.2               | 0.6                        | 2.5             | 0.00    |
| <i>yttP</i>  | 1.6               | 3.9                        | 2.4             | 0.02    |
| <i>speD</i>  | 1.4               | 3.3                        | 2.4             | 0.03    |
| <i>pepT</i>  | 0.7               | 1.6                        | 2.4             | 0.00    |
| <i>cbiO</i>  | 0.9               | 2.1                        | 2.4             | 0.00    |
| <i>yqdB</i>  | 0.3               | 0.6                        | 2.3             | 0.00    |
| <i>yrzF</i>  | 1.3               | 3.1                        | 2.3             | 0.02    |
| <i>glpK</i>  | 0.3               | 0.6                        | 2.3             | 0.00    |
| <i>ltaSA</i> | 0.3               | 0.7                        | 2.3             | 0.04    |
| <i>dinG</i>  | 0.3               | 0.7                        | 2.3             | 0.00    |
| <i>ywqF</i>  | 0.9               | 2.1                        | 2.3             | 0.00    |
| <i>yvyD</i>  | 0.9               | 1.9                        | 2.3             | 0.03    |
| <i>yitS</i>  | 0.7               | 1.6                        | 2.3             | 0.01    |
| <i>groES</i> | 0.7               | 1.7                        | 2.3             | 0.00    |
| <i>yxIH</i>  | 0.5               | 1.1                        | 2.2             | 0.00    |
| <i>yczI</i>  | 1.0               | 2.2                        | 2.2             | 0.00    |

|              |     |     |     |      |
|--------------|-----|-----|-----|------|
| <i>swrC</i>  | 0.3 | 0.6 | 2.1 | 0.00 |
| <i>glcT</i>  | 0.1 | 0.3 | 2.1 | 0.00 |
| <i>ykuT</i>  | 1.3 | 2.7 | 2.1 | 0.00 |
| <i>ydiH</i>  | 0.4 | 0.8 | 2.1 | 0.00 |
| <i>yhdT</i>  | 0.9 | 1.8 | 2.0 | 0.00 |
| <i>opuD</i>  | 0.5 | 1.0 | 2.0 | 0.00 |
| <i>opuAA</i> | 0.5 | 1.0 | 2.0 | 0.04 |
| <i>rpsB</i>  | 1.1 | 2.2 | 2.0 | 0.00 |
| <i>lspA</i>  | 0.6 | 1.3 | 2.0 | 0.01 |
| <i>rpsF</i>  | 0.7 | 1.3 | 2.0 | 0.02 |
| <i>yxjB</i>  | 1.7 | 3.3 | 2.0 | 0.01 |
| <i>sigH</i>  | 0.9 | 1.8 | 2.0 | 0.01 |
| <i>yclQ</i>  | 0.8 | 1.5 | 1.9 | 0.01 |
| <i>ycgQ</i>  | 0.6 | 1.1 | 1.9 | 0.00 |
| <i>yngC</i>  | 0.5 | 0.9 | 1.9 | 0.00 |
| <i>leuS</i>  | 0.4 | 0.9 | 1.9 | 0.00 |
| <i>ydgJ</i>  | 0.7 | 1.3 | 1.9 | 0.01 |
| <i>yfhP</i>  | 0.5 | 0.9 | 1.9 | 0.00 |
| <i>yugJ</i>  | 1.1 | 2.1 | 1.9 | 0.00 |
| <i>nrdI</i>  | 0.9 | 1.6 | 1.9 | 0.03 |
| <i>yqgS</i>  | 0.7 | 1.3 | 1.9 | 0.00 |
| <i>metS</i>  | 0.3 | 0.5 | 1.9 | 0.00 |
| <i>ileS</i>  | 0.4 | 0.7 | 1.9 | 0.00 |
| <i>bkdR</i>  | 0.6 | 1.1 | 1.8 | 0.00 |
| <i>yxbB</i>  | 1.2 | 2.2 | 1.8 | 0.00 |
| <i>yhdY</i>  | 0.5 | 0.9 | 1.8 | 0.02 |
| <i>lysS</i>  | 0.6 | 1.1 | 1.8 | 0.00 |
| <i>ytfP</i>  | 0.4 | 0.8 | 1.8 | 0.00 |
| <i>yugM</i>  | 1.1 | 2.1 | 1.8 | 0.01 |
| <i>ytoP</i>  | 0.4 | 0.7 | 1.8 | 0.00 |
| <i>bglA</i>  | 0.6 | 1.1 | 1.8 | 0.00 |
| <i>yheG</i>  | 1.3 | 2.3 | 1.8 | 0.00 |
| <i>yuiD</i>  | 0.9 | 1.6 | 1.8 | 0.01 |
| <i>ywfL</i>  | 0.7 | 1.3 | 1.8 | 0.01 |
| <i>yhcX</i>  | 0.5 | 0.9 | 1.8 | 0.01 |
| <i>dnaA</i>  | 0.4 | 0.7 | 1.8 | 0.01 |
| <i>aspB</i>  | 0.5 | 0.9 | 1.8 | 0.00 |
| <i>ytzE</i>  | 1.4 | 2.5 | 1.8 | 0.03 |
| <i>purR</i>  | 0.3 | 0.4 | 1.8 | 0.00 |
| <i>ypvA</i>  | 0.5 | 0.9 | 1.8 | 0.00 |
| <i>yulF</i>  | 0.6 | 1.1 | 1.8 | 0.00 |
| <i>ykaA</i>  | 0.6 | 1.0 | 1.8 | 0.00 |
| <i>murB</i>  | 0.5 | 0.8 | 1.8 | 0.01 |
| <i>ftsH</i>  | 0.4 | 0.6 | 1.8 | 0.00 |
| <i>tagF</i>  | 0.5 | 0.9 | 1.7 | 0.00 |
| <i>yfmC</i>  | 0.6 | 1.1 | 1.7 | 0.01 |
| <i>maf</i>   | 0.4 | 0.6 | 1.7 | 0.02 |

|              |     |     |     |      |
|--------------|-----|-----|-----|------|
| <i>yydA</i>  | 0.5 | 0.9 | 1.7 | 0.00 |
| <i>gudB</i>  | 0.7 | 1.2 | 1.7 | 0.00 |
| <i>yabD</i>  | 0.6 | 1.0 | 1.7 | 0.00 |
| <i>recU</i>  | 0.7 | 1.2 | 1.7 | 0.00 |
| <i>clpC</i>  | 0.5 | 0.9 | 1.7 | 0.00 |
| <i>rbsA</i>  | 0.5 | 0.9 | 1.7 | 0.02 |
| <i>ydiF</i>  | 0.4 | 0.7 | 1.7 | 0.00 |
| <i>metN</i>  | 0.8 | 1.4 | 1.7 | 0.01 |
| <i>tdh</i>   | 1.3 | 2.3 | 1.7 | 0.03 |
| <i>ywtF</i>  | 0.5 | 0.8 | 1.7 | 0.00 |
| <i>kinD</i>  | 0.5 | 0.8 | 1.7 | 0.01 |
| <i>ponA</i>  | 0.3 | 0.6 | 1.7 | 0.00 |
| <i>fbp</i>   | 0.3 | 0.5 | 1.7 | 0.00 |
| <i>topA</i>  | 0.3 | 0.4 | 1.7 | 0.02 |
| <i>ylaL</i>  | 0.7 | 1.1 | 1.7 | 0.00 |
| <i>clpE</i>  | 0.4 | 0.7 | 1.7 | 0.00 |
| <i>yrpD</i>  | 1.1 | 1.8 | 1.7 | 0.01 |
| <i>trmB</i>  | 1.0 | 1.6 | 1.7 | 0.00 |
| <i>ndoA</i>  | 1.3 | 2.1 | 1.7 | 0.03 |
| <i>pheT</i>  | 0.5 | 0.9 | 1.7 | 0.00 |
| <i>cggR</i>  | 2.2 | 3.6 | 1.7 | 0.01 |
| <i>dtpT</i>  | 0.3 | 0.5 | 1.7 | 0.00 |
| <i>spoVE</i> | 1.1 | 1.8 | 1.7 | 0.00 |
| <i>ylbN</i>  | 0.9 | 1.5 | 1.7 | 0.04 |
| <i>ylxS</i>  | 0.9 | 1.4 | 1.7 | 0.04 |
| <i>yqkF</i>  | 0.3 | 0.5 | 1.7 | 0.01 |
| <i>comA</i>  | 0.8 | 1.3 | 1.7 | 0.01 |
| <i>ybaS</i>  | 0.6 | 1.0 | 1.6 | 0.01 |
| <i>proA</i>  | 0.6 | 0.9 | 1.6 | 0.01 |
| <i>ytcJ</i>  | 0.7 | 1.2 | 1.6 | 0.03 |
| <i>yqgU</i>  | 0.8 | 1.2 | 1.6 | 0.00 |
| <i>nrnA</i>  | 0.6 | 0.9 | 1.6 | 0.00 |
| <i>ydiL</i>  | 0.6 | 0.9 | 1.6 | 0.01 |
| <i>khtS</i>  | 0.9 | 1.5 | 1.6 | 0.00 |
| <i>recX</i>  | 0.6 | 0.9 | 1.6 | 0.00 |
| <i>fhuD</i>  | 0.4 | 0.7 | 1.6 | 0.01 |
| <i>ypuA</i>  | 1.1 | 1.8 | 1.6 | 0.03 |
| <i>ytoA</i>  | 1.2 | 2.0 | 1.6 | 0.01 |
| <i>wprA</i>  | 0.7 | 1.1 | 1.6 | 0.02 |
| <i>rbsK</i>  | 0.5 | 0.8 | 1.6 | 0.00 |
| <i>recJ</i>  | 0.5 | 0.8 | 1.6 | 0.02 |
| <i>yitL</i>  | 0.3 | 0.5 | 1.6 | 0.01 |
| <i>mprF</i>  | 0.4 | 0.7 | 1.6 | 0.03 |
| <i>ydbl</i>  | 0.4 | 0.7 | 1.6 | 0.02 |
| <i>mraW</i>  | 0.7 | 1.2 | 1.6 | 0.01 |
| <i>ykul</i>  | 0.5 | 0.8 | 1.6 | 0.00 |
| <i>yheN</i>  | 0.9 | 1.4 | 1.6 | 0.02 |

|              |     |     |     |      |
|--------------|-----|-----|-----|------|
| <i>pbpA</i>  | 0.4 | 0.7 | 1.6 | 0.00 |
| <i>yrrC</i>  | 0.6 | 0.9 | 1.6 | 0.00 |
| <i>ywfO</i>  | 0.4 | 0.7 | 1.6 | 0.03 |
| <i>pyrH</i>  | 0.8 | 1.2 | 1.6 | 0.01 |
| <i>yrrM</i>  | 0.8 | 1.3 | 1.6 | 0.01 |
| <i>ytoQ</i>  | 1.0 | 1.6 | 1.6 | 0.00 |
| <i>ansR</i>  | 0.6 | 0.9 | 1.6 | 0.00 |
| <i>yflE</i>  | 0.5 | 0.8 | 1.6 | 0.02 |
| <i>ylbL</i>  | 0.5 | 0.8 | 1.6 | 0.01 |
| <i>secDF</i> | 0.5 | 0.8 | 1.6 | 0.00 |
| <i>mbl</i>   | 0.6 | 0.9 | 1.6 | 0.01 |
| <i>yckB</i>  | 0.5 | 0.7 | 1.6 | 0.02 |
| <i>thrS</i>  | 0.4 | 0.7 | 1.6 | 0.01 |
| <i>yloA</i>  | 0.4 | 0.6 | 1.6 | 0.00 |
| <i>rpsD</i>  | 1.0 | 1.6 | 1.6 | 0.01 |
| <i>fadG</i>  | 0.7 | 1.1 | 1.6 | 0.01 |
| <i>ftsX</i>  | 0.7 | 1.1 | 1.6 | 0.00 |
| <i>ybeC</i>  | 0.6 | 0.9 | 1.6 | 0.01 |
| <i>mtn</i>   | 1.0 | 1.5 | 1.6 | 0.01 |
| <i>ylaN</i>  | 1.1 | 1.7 | 1.6 | 0.04 |
| <i>ywch</i>  | 0.5 | 0.8 | 1.6 | 0.00 |
| <i>yerQ</i>  | 0.7 | 1.1 | 1.6 | 0.00 |
| <i>dacA</i>  | 0.3 | 0.5 | 1.6 | 0.00 |
| <i>sacA</i>  | 0.6 | 1.0 | 1.6 | 0.02 |
| <i>ycnK</i>  | 1.0 | 1.5 | 1.5 | 0.00 |
| <i>yqjE</i>  | 0.7 | 1.1 | 1.5 | 0.03 |
| <i>coaX</i>  | 0.4 | 0.7 | 1.5 | 0.03 |
| <i>ftsZ</i>  | 0.4 | 0.6 | 1.5 | 0.01 |
| <i>clpX</i>  | 0.6 | 1.0 | 1.5 | 0.03 |
| <i>yshA</i>  | 0.6 | 0.8 | 1.5 | 0.03 |
| <i>hisC</i>  | 0.6 | 1.0 | 1.5 | 0.00 |
| <i>pel</i>   | 0.7 | 1.1 | 1.5 | 0.00 |
| <i>dgk</i>   | 0.7 | 1.0 | 1.5 | 0.04 |
| <i>pfkA</i>  | 0.5 | 0.7 | 1.5 | 0.01 |
| <i>ykpA</i>  | 0.4 | 0.7 | 1.5 | 0.01 |
| <i>degU</i>  | 0.9 | 1.4 | 1.5 | 0.02 |
| <i>pdhA</i>  | 0.7 | 1.0 | 1.5 | 0.00 |
| <i>mutL</i>  | 0.7 | 1.0 | 1.5 | 0.00 |
| <i>bglH</i>  | 0.5 | 0.8 | 1.5 | 0.00 |
| <i>yerH</i>  | 0.6 | 1.0 | 1.5 | 0.03 |
| <i>uvrA</i>  | 0.7 | 1.1 | 1.5 | 0.03 |
| <i>ytIP</i>  | 0.7 | 1.0 | 1.5 | 0.02 |
| <i>gyrB</i>  | 0.5 | 0.7 | 1.5 | 0.00 |
